# Supplementary material for: Proteogenomic Study of the Effect of an Improved Mixed Diet of Live Preys on the Aquaculture of Octopus vulgaris Paralarvae
Source: Frontiers journal article supplement (doi:10.3389/fmars.2021.817701), 2022-02-17
Supplement: Table_1.XLSX [file Table_1.XLSX]

## Sheet: Hoja1
	Supplementary Table 1. List of primers used in this study including the nucleotide sequence where primers were designed (Cluster) and the efficiency of the reaction.
	Gene Name	Cluster	Forward Primer	Reverse Primer	Efficiency (%)
	Dual-tyrosine PR Kinase	Cluster-58773.138998	GTCTTCGAGGTGGCTTTATG	GGGAATCTGCTGACTTCTTG	92.6974
	Four-joinbox	Cluster-58773.245007	CCAAGAGATATCAAGTGGAGTG	TTGGTTCAAGACCCTCAATC	98.8009
	Lysozyme	Cluster-132596.0	CCTTGAATGTATGTGTCAGGTAG	AAATAGTCGCCCGCATTC	105.35
	Chitinase 3	Cluster-58773.163432	GCTCTAAGACAGGGCTCGAA	CCAGCAAAACTCAACAGCAA	96.5682
	Cytosolic-phospholipase	Cluster-58773.34812	CGAAAGTGCCGAGTGTATGA	GAAACCACCTCCAGATCCAA	106.666
	Setmar	Cluster-58773.89227	CTGTATCTCTGCAACCTGTAAG	CATGGCAATAACTAAGCCAATC	99.8636
	MCM5	Cluster-58773.116525	TGTGTGTGTGTGTCCTTATTC	CCTTGGGTGTAGGTTAGAAATC	96.5643
	Microphthalmia-TF	Cluster-58773.165018	CCAATATGGTGGCACTTCAG	GCTACTGCTGGTAAAGGTAAAG	97.5527
	S1 peptidase	Cluster-58773.185615	TCTGGAGGTCCACTCTATTG	AAGCACTGACTTCTCCATTAC	100.923
	Pyruvate carboxylase	Cluster-58773.135223	CCAATGCTGTCGGCTATAC	AGAATCAAACACTCGGAAGAC	96.8419
	Glutamine synthetase	Cluster-58773.160657	CATCGTGTTGCTGAAGATTTG	AAGGTACTGAAGTTGGTATGTG	93.0698
	Carnitine O-palmitoyltransferase 1	Cluster-58773.137252	CTAGACAGAGAGGAGATCAAGCC	TGATGACTCTGTGTGTACCAGG	93.06
