# Supplementary material for: Proteogenomic Study of the Effect of an Improved Mixed Diet of Live Preys on the Aquaculture of Octopus vulgaris Paralarvae
Source: Frontiers journal article supplement (doi:10.3389/fmars.2021.817701), 2022-02-17
Supplement: Table_2.XLSX [file Table_2.XLSX]

## Sheet: Supplemenatry Table 2
Supplementary Table 2: List of differentially expressed genes including the fold change value (M vs A) and their annotation against Nt, Nr, Pfam, GO, Swiss-Prot, KOG and KO databases. GO enrichment analysis in up- and down-regulated genes. Significant differences were considered at adjusted p-value < 0.05.

## Sheet: Down-regulated genes (M vs A)
Differentially down-regulated genes (M vs A)
gene_id	OPM_20_readcount	OPA_20_readcount	log2FoldChange	padj	Gene Length	NR GI	NR ID	NR Evalue	NR Description	NT GI	NT ID	NT Evalue	NT Description	KO ID	KO Name	KO Description	Http Link	Swissprot ID	Swissprot Evalue	Swissprot Description	PFAM ID	PFAM description	Gene Ontology Biological Pathway	BP Description	Gene Ontology Molecular Function	MF Description	Gene Ontology Cellular Component	CC Description	KOG ID	KOG Description
Cluster-58773.60960	1789.55	10685.1	-2.5779	7.9695e-35	728	871246464	XP_012940508.1	3.9e-37	PREDICTED: uncharacterized protein LOC101848762 [Aplysia californica]	961131012	XM_014930487.1	0	PREDICTED: Octopus bimaculoides cartilage matrix protein-like (LOC106880508), mRNA	--	--	--	--	Q99715	1.8e-24	Collagen alpha-1(XII) chain OS=Homo sapiens GN=COL12A1 PE=1 SV=2	PF03623	Focal adhesion targeting region	GO:0007165//GO:0006468//GO:0007172	signal transduction//protein phosphorylation//signal complex assembly	GO:0004713//GO:0004871	protein tyrosine kinase activity//signal transducer activity	GO:0005925	focal adhesion	--	--
Cluster-58773.60962	4299.44	17645.8	-2.0371	2.943e-29	1787	762116501	XP_011441088.1	3.9e-70	PREDICTED: collagen alpha-4(VI) chain-like [Crassostrea gigas]	961131012	XM_014930487.1	0	PREDICTED: Octopus bimaculoides cartilage matrix protein-like (LOC106880508), mRNA	--	--	--	--	A6H584	1.8e-38	Collagen alpha-5(VI) chain OS=Mus musculus GN=Col6a5 PE=1 SV=4	--	--	--	--	--	--	--	--	--	--
Cluster-58773.162111	19361.1	68033.8	-1.8131	1.0843e-28	971	675369799	KFM62701.1	1.9e-07	Laminin subunit alpha-2, partial [Stegodyphus mimosarum]	961072884	XM_014928522.1	0	PREDICTED: Octopus bimaculoides uncharacterized LOC106879085 (LOC106879085), mRNA	--	--	--	--	--	--	--	PF03273//PF05130//PF01442//PF05791//PF05192//PF04513//PF01817	Baculovirus gp64 envelope glycoprotein family//FlgN protein//Apolipoprotein A1/A4/E domain//Bacillus haemolytic enterotoxin (HBL)//MutS domain III//Baculovirus polyhedron envelope protein, PEP, C terminus//Chorismate mutase type II	GO:0006869//GO:0044780//GO:0019048//GO:0042157//GO:0009405//GO:0006298//GO:0046417	lipid transport//bacterial-type flagellum assembly//modulation by virus of host morphology or physiology//lipoprotein metabolic process//pathogenesis//mismatch repair//chorismate metabolic process	GO:0030983//GO:0005198//GO:0005524//GO:0008289	mismatched DNA binding//structural molecule activity//ATP binding//lipid binding	GO:0019031//GO:0016020//GO:0005576//GO:0019028	viral envelope//membrane//extracellular region//viral capsid	--	--
Cluster-58773.173978	2996.08	12268	-2.0338	4.5027e-28	1632	676485144	XP_009063566.1	1.1e-100	hypothetical protein LOTGIDRAFT_130303, partial [Lottia gigantea]>gi|556097185|gb|ESO85837.1| hypothetical protein LOTGIDRAFT_130303, partial [Lottia gigantea]	961140602	XR_001411057.1	2.52985e-116	PREDICTED: Octopus bimaculoides uncharacterized LOC106882972 (LOC106882972), transcript variant X1, ncRNA	--	--	--	--	Q13231	8.4e-91	Chitotriosidase-1 OS=Homo sapiens GN=CHIT1 PE=1 SV=1	PF00704//PF01607	Glycosyl hydrolases family 18//Chitin binding Peritrophin-A domain	GO:0006030//GO:0005975	chitin metabolic process//carbohydrate metabolic process	GO:0004553//GO:0008061	hydrolase activity, hydrolyzing O-glycosyl compounds//chitin binding	GO:0005576	extracellular region	KOG2806	Chitinase
Cluster-58773.106394	1839.18	8242.11	-2.164	4.6408e-28	1106	595744435	AHM92582.1	5.2e-89	chitotriosidase [Euprymna scolopes]	961092278	XR_001409566.1	0	PREDICTED: Octopus bimaculoides uncharacterized LOC106870765 (LOC106870765), ncRNA	--	--	--	--	Q13231	7.7e-48	Chitotriosidase-1 OS=Homo sapiens GN=CHIT1 PE=1 SV=1	PF01555//PF00704	DNA methylase//Glycosyl hydrolases family 18	GO:0005975//GO:0006306	carbohydrate metabolic process//DNA methylation	GO:0004553//GO:0008170//GO:0003677	hydrolase activity, hydrolyzing O-glycosyl compounds//N-methyltransferase activity//DNA binding	--	--	KOG2806	Chitinase
Cluster-58773.163432	2267.54	9660.86	-2.091	2.1194e-27	1330	762102165	XP_011433571.1	4.8e-89	PREDICTED: probable chitinase 3 [Crassostrea gigas]	961092204	XM_014916934.1	0	PREDICTED: Octopus bimaculoides chitotriosidase-1-like (LOC106870744), mRNA	--	--	--	--	Q13231	9.9e-82	Chitotriosidase-1 OS=Homo sapiens GN=CHIT1 PE=1 SV=1	PF00704	Glycosyl hydrolases family 18	GO:0005975	carbohydrate metabolic process	GO:0004553	hydrolase activity, hydrolyzing O-glycosyl compounds	--	--	KOG2806	Chitinase
Cluster-58773.212366	5256.13	19438.1	-1.8868	1.4621e-26	2706	762116501	XP_011441088.1	1.9e-92	PREDICTED: collagen alpha-4(VI) chain-like [Crassostrea gigas]	961116978	XM_014925627.1	0	PREDICTED: Octopus bimaculoides cartilage matrix protein-like (LOC106876883), mRNA	--	--	--	--	Q8C6K9	1.1e-58	Collagen alpha-6(VI) chain OS=Mus musculus GN=Col6a6 PE=1 SV=2	PF00483	Nucleotidyl transferase	GO:0009058	biosynthetic process	GO:0016779	nucleotidyltransferase activity	--	--	--	--
Cluster-58773.128327	3750.77	14205.4	-1.9212	5.6593e-26	1004	--	--	--	--	961093511	XM_014917379.1	0	PREDICTED: Octopus bimaculoides uncharacterized LOC106871090 (LOC106871090), transcript variant X1, mRNA	--	--	--	--	--	--	--	PF01607	Chitin binding Peritrophin-A domain	GO:0006030	chitin metabolic process	GO:0008061	chitin binding	GO:0005576	extracellular region	--	--
Cluster-58773.164825	10777.6	36010.2	-1.7404	6.3014e-26	961	--	--	--	--	961127748	XM_014929354.1	0	PREDICTED: Octopus bimaculoides uncharacterized LOC106879679 (LOC106879679), mRNA	--	--	--	--	--	--	--	PF00811	Ependymin	GO:0007160	cell-matrix adhesion	GO:0005509	calcium ion binding	GO:0005576	extracellular region	--	--
Cluster-58773.162109	9484.91	39149.8	-2.0453	1.716e-25	730	--	--	--	--	961083089	XR_001409299.1	3.24502e-77	PREDICTED: Octopus bimaculoides uncharacterized LOC106868468 (LOC106868468), ncRNA	--	--	--	--	--	--	--	PF01031	Dynamin central region	--	--	GO:0005525	GTP binding	--	--	--	--
Cluster-58773.135700	8315.1	26851.3	-1.6912	1.6555e-23	997	283837550	BAI66447.1	2.7e-89	serine protease 1 [Heterololigo bleekeri]	961139148	XM_014933316.1	0	PREDICTED: Octopus bimaculoides chymotrypsin-1-like (LOC106882587), mRNA	--	--	--	--	P40313	1.7e-30	Chymotrypsin-like protease CTRL-1 OS=Homo sapiens GN=CTRL PE=2 SV=1	PF00089	Trypsin	GO:0006508	proteolysis	GO:0004252	serine-type endopeptidase activity	--	--	--	--
Cluster-58773.185589	122.18	1272.66	-3.3808	1.1924e-22	827	405975065	EKC39661.1	1.9e-56	hypothetical protein CGI_10025118 [Crassostrea gigas]	961073214	XM_014929670.1	0	PREDICTED: Octopus bimaculoides uncharacterized LOC106879916 (LOC106879916), mRNA	--	--	--	--	--	--	--	PF03067	Chitin binding domain	--	--	--	--	GO:0019028	viral capsid	--	--
Cluster-58773.144077	7848.35	25024.2	-1.6729	1.6514e-22	408	--	--	--	--	--	--	--	--	--	--	--	--	--	--	--	--	--	--	--	--	--	--	--	--	--
Cluster-58773.178638	391.016	2078.21	-2.41	8.9081e-22	1657	451173798	AGF33810.1	3e-72	astacin-like metalloprotease [Sepiella maindroni]	961100726	XM_014919841.1	0	PREDICTED: Octopus bimaculoides meprin A subunit alpha-like (LOC106872749), mRNA	--	--	--	--	B3EWZ6	1.6e-28	MAM and LDL-receptor class A domain-containing protein 2 (Fragment) OS=Acropora millepora PE=1 SV=1	PF00629//PF01400	MAM domain, meprin/A5/mu//Astacin (Peptidase family M12A)	GO:0006508	proteolysis	GO:0004222	metalloendopeptidase activity	GO:0016020	membrane	KOG3714	Meprin A metalloprotease
Cluster-58773.140830	18486.1	54153.4	-1.5506	1.323e-21	786	676441940	XP_009049647.1	2.4e-40	hypothetical protein LOTGIDRAFT_238761 [Lottia gigantea]>gi|556111034|gb|ESO99685.1| hypothetical protein LOTGIDRAFT_238761 [Lottia gigantea]	961078913	XR_001409144.1	5.74376e-90	PREDICTED: Octopus bimaculoides uncharacterized LOC106867424 (LOC106867424), ncRNA	--	--	--	--	P81439	2.3e-09	Equistatin OS=Actinia equina PE=1 SV=1	PF14865	Macin	GO:0006952	defense response	--	--	--	--	--	--
Cluster-58773.164160	2263.07	8347.42	-1.8831	1.5913e-21	1268	405966888	EKC32120.1	4.3e-63	Collagen alpha-3(VI) chain [Crassostrea gigas]	961118709	XM_014926223.1	0	PREDICTED: Octopus bimaculoides collagen alpha-6(VI) chain-like (LOC106877343), mRNA	--	--	--	--	A2AX52	1.4e-45	Collagen alpha-4(VI) chain OS=Mus musculus GN=Col6a4 PE=1 SV=2	--	--	--	--	--	--	--	--	--	--
Cluster-58773.140091	5699.64	20893.2	-1.8741	5.6893e-21	798	291242935	XP_002741349.1	1.4e-27	PREDICTED: epididymal secretory protein E1-like [Saccoglossus kowalevskii]	--	--	--	--	--	--	--	--	Q9VQ62	2.3e-25	Protein NPC2 homolog OS=Drosophila melanogaster GN=Npc2a PE=2 SV=1	PF09171	Domain of unknown function (DUF1886)	GO:0006284	base-excision repair	GO:0003906//GO:0016799	DNA-(apurinic or apyrimidinic site) lyase activity//hydrolase activity, hydrolyzing N-glycosyl compounds	--	--	--	--
Cluster-58773.138035	2631.17	12183.3	-2.2111	1.4248e-20	574	--	--	--	--	961092097	XM_014916897.1	0	PREDICTED: Octopus bimaculoides uncharacterized LOC106870726 (LOC106870726), mRNA	--	--	--	--	--	--	--	--	--	--	--	--	--	--	--	--	--
Cluster-58773.174310	1874.75	6832.09	-1.8656	3.3531e-19	1038	198419836	XP_002127695.1	2.5e-21	PREDICTED: epididymal secretory protein E1-like [Ciona intestinalis]	961075971	XM_014935279.1	0	PREDICTED: Octopus bimaculoides ecdysteroid-regulated 16 kDa protein-like (LOC106884063), mRNA	--	--	--	--	Q25481	1.1e-19	Ecdysteroid-regulated 16 kDa protein OS=Manduca sexta GN=ESR16 PE=2 SV=1	--	--	--	--	--	--	--	--	--	--
Cluster-58773.106395	4940.4	15290.7	-1.63	3.4045e-19	1166	595744435	AHM92582.1	5.4e-145	chitotriosidase [Euprymna scolopes]	961092264	XM_014916957.1	0	PREDICTED: Octopus bimaculoides acidic mammalian chitinase-like (LOC106870760), mRNA	--	--	--	--	Q13231	5.5e-60	Chitotriosidase-1 OS=Homo sapiens GN=CHIT1 PE=1 SV=1	PF01607//PF00704	Chitin binding Peritrophin-A domain//Glycosyl hydrolases family 18	GO:0005975//GO:0006030	carbohydrate metabolic process//chitin metabolic process	GO:0008061//GO:0004553	chitin binding//hydrolase activity, hydrolyzing O-glycosyl compounds	GO:0005576	extracellular region	KOG2806	Chitinase
Cluster-58773.167085	1707.45	6080.05	-1.8606	2.7022e-18	2074	733387118	AIZ97492.1	2.8e-152	putative chitotriosidase [Euprymna scolopes]	961075566	XM_014935140.1	0	PREDICTED: Octopus bimaculoides acidic mammalian chitinase-like (LOC106883980), mRNA	--	--	--	--	Q95M17	1e-101	Acidic mammalian chitinase OS=Bos taurus GN=CHIA PE=1 SV=1	PF00704	Glycosyl hydrolases family 18	GO:0055114//GO:0006313//GO:0015074//GO:0006260	oxidation-reduction process//transposition, DNA-mediated//DNA integration//DNA replication	GO:0016616//GO:0003677	oxidoreductase activity, acting on the CH-OH group of donors, NAD or NADP as acceptor//DNA binding	GO:0005634	nucleus	KOG2806	Chitinase
Cluster-58773.181926	4155.92	15092.9	-1.8322	2.7022e-18	1844	510862104	EPB77486.1	5.1e-49	transposase [Ancylostoma ceylanicum]	--	--	--	--	--	--	--	--	P35072	3e-44	Transposable element Tcb1 transposase OS=Caenorhabditis briggsae PE=3 SV=1	PF01498//PF09329//PF02866	Transposase//Primase zinc finger//lactate/malate dehydrogenase, alpha/beta C-terminal domain	GO:0005975	carbohydrate metabolic process	GO:0004553	hydrolase activity, hydrolyzing O-glycosyl compounds	--	--	--	--
Cluster-58773.155221	4028.12	17194.6	-2.0938	3.4262e-18	1128	762092086	XP_011428466.1	3.2e-46	PREDICTED: periostin-like [Crassostrea gigas]>gi|405960569|gb|EKC26483.1| Transforming growth factor-beta-induced protein ig-h3 [Crassostrea gigas]	961114993	XM_014924881.1	0	PREDICTED: Octopus bimaculoides periostin-like (LOC106876370), mRNA	--	--	--	--	Q15063	2e-14	Periostin OS=Homo sapiens GN=POSTN PE=1 SV=2	--	--	--	--	--	--	--	--	--	--
Cluster-58773.174521	7577.37	21711.6	-1.5187	2.0182e-17	327	--	--	--	--	--	--	--	--	--	--	--	--	--	--	--	--	--	--	--	--	--	--	--	--	--
Cluster-58773.178193	2700.06	8560.34	-1.6647	5.0058e-17	1289	676432943	XP_009046739.1	1.7e-11	hypothetical protein LOTGIDRAFT_171922 [Lottia gigantea]>gi|556113947|gb|ESP02599.1| hypothetical protein LOTGIDRAFT_171922 [Lottia gigantea]	961141686	XM_014934197.1	0	PREDICTED: Octopus bimaculoides uncharacterized LOC106883259 (LOC106883259), transcript variant X2, mRNA	--	--	--	--	--	--	--	--	--	--	--	--	--	--	--	--	--
Cluster-58773.60959	115.889	722.079	-2.6394	5.7518e-17	509	762116501	XP_011441088.1	6.8e-28	PREDICTED: collagen alpha-4(VI) chain-like [Crassostrea gigas]	961131012	XM_014930487.1	0	PREDICTED: Octopus bimaculoides cartilage matrix protein-like (LOC106880508), mRNA	--	--	--	--	Q60847	3.2e-17	Collagen alpha-1(XII) chain OS=Mus musculus GN=Col12a1 PE=2 SV=3	--	--	--	--	--	--	--	--	--	--
Cluster-58773.117162	5029.67	23107.7	-2.1998	9.8732e-17	4146	780132053	XP_011679402.1	1.5e-202	PREDICTED: deleted in malignant brain tumors 1 protein, partial [Strongylocentrotus purpuratus]	961075121	XM_014934994.1	0	PREDICTED: Octopus bimaculoides deleted in malignant brain tumors 1 protein-like (LOC106883855), mRNA	--	--	--	--	Q9NR16	1e-129	Scavenger receptor cysteine-rich type 1 protein M160 OS=Homo sapiens GN=CD163L1 PE=1 SV=2	PF02325//PF15494//PF00530//PF09272	YGGT family//Scavenger receptor cysteine-rich domain//Scavenger receptor cysteine-rich domain//Hepsin, SRCR	GO:0007165	signal transduction	GO:0005044//GO:0070008//GO:0004252	scavenger receptor activity//serine-type exopeptidase activity//serine-type endopeptidase activity	GO:0016020	membrane	--	--
Cluster-58773.106392	867.241	3223.95	-1.8943	3.1291e-16	1681	595744435	AHM92582.1	8.6e-237	chitotriosidase [Euprymna scolopes]	961092264	XM_014916957.1	0	PREDICTED: Octopus bimaculoides acidic mammalian chitinase-like (LOC106870760), mRNA	K01183	E3.2.1.14	chitinase	http://www.genome.jp/dbget-bin/www_bget?ko:K01183	Q13231	4.2e-114	Chitotriosidase-1 OS=Homo sapiens GN=CHIT1 PE=1 SV=1	PF01607//PF00704	Chitin binding Peritrophin-A domain//Glycosyl hydrolases family 18	GO:0006030//GO:0005975	chitin metabolic process//carbohydrate metabolic process	GO:0004553//GO:0008061	hydrolase activity, hydrolyzing O-glycosyl compounds//chitin binding	GO:0005576	extracellular region	KOG2806	Chitinase
Cluster-58773.164824	1507.84	5395.62	-1.8393	4.7733e-16	686	--	--	--	--	961127748	XM_014929354.1	0	PREDICTED: Octopus bimaculoides uncharacterized LOC106879679 (LOC106879679), mRNA	--	--	--	--	--	--	--	PF00811	Ependymin	GO:0007160	cell-matrix adhesion	GO:0005509	calcium ion binding	GO:0005576	extracellular region	--	--
Cluster-58773.132042	9971.53	30045.7	-1.5913	5.4126e-16	1809	492370606	AGL33705.1	4.4e-61	cathepsin L2 [Sinonovacula constricta]	961087008	XM_014915124.1	0	PREDICTED: Octopus bimaculoides cathepsin L1-like (LOC106869401), mRNA	--	--	--	--	Q28944	9.1e-54	Cathepsin L1 OS=Sus scrofa GN=CTSL PE=2 SV=1	PF00112//PF03051	Papain family cysteine protease//Peptidase C1-like family	GO:0006508	proteolysis	GO:0004197//GO:0008234	cysteine-type endopeptidase activity//cysteine-type peptidase activity	--	--	KOG1543	Cysteine proteinase Cathepsin L
Cluster-58773.60958	144.112	806.521	-2.4845	7.3338e-16	777	762116501	XP_011441088.1	1e-43	PREDICTED: collagen alpha-4(VI) chain-like [Crassostrea gigas]	961131012	XM_014930487.1	0	PREDICTED: Octopus bimaculoides cartilage matrix protein-like (LOC106880508), mRNA	--	--	--	--	A6H584	2e-26	Collagen alpha-5(VI) chain OS=Mus musculus GN=Col6a5 PE=1 SV=4	--	--	--	--	--	--	--	--	--	--
Cluster-58773.162108	1055.3	3764.95	-1.835	8.8252e-16	655	675369799	KFM62701.1	5.9e-08	Laminin subunit alpha-2, partial [Stegodyphus mimosarum]	961083091	XR_001409300.1	0	PREDICTED: Octopus bimaculoides uncharacterized LOC106868469 (LOC106868469), ncRNA	--	--	--	--	--	--	--	PF04108//PF05427//PF01031//PF04513//PF05130//PF01442	Autophagy protein Apg17//Acidic fibroblast growth factor binding (FIBP)//Dynamin central region//Baculovirus polyhedron envelope protein, PEP, C terminus//FlgN protein//Apolipoprotein A1/A4/E domain	GO:0006869//GO:0044780//GO:0006914//GO:0042157	lipid transport//bacterial-type flagellum assembly//autophagy//lipoprotein metabolic process	GO:0005525//GO:0017134//GO:0008289//GO:0005198	GTP binding//fibroblast growth factor binding//lipid binding//structural molecule activity	GO:0005576//GO:0019031//GO:0019028	extracellular region//viral envelope//viral capsid	--	--
Cluster-58773.114694	3551.23	10527.6	-1.5678	2.2162e-15	958	676484286	XP_009063297.1	5.9e-65	hypothetical protein LOTGIDRAFT_235629 [Lottia gigantea]>gi|556097398|gb|ESO86050.1| hypothetical protein LOTGIDRAFT_235629 [Lottia gigantea]	961068114	XM_014912076.1	0	PREDICTED: Octopus bimaculoides uncharacterized LOC106867257 (LOC106867257), mRNA	--	--	--	--	--	--	--	PF02533	Photosystem II 4 kDa reaction centre component	GO:0015979	photosynthesis	--	--	GO:0009523//GO:0009539	photosystem II//photosystem II reaction center	--	--
Cluster-58773.141200	1362.69	5560.46	-2.0287	2.5128e-15	1108	676484289	XP_009063298.1	9.2e-78	hypothetical protein LOTGIDRAFT_235630 [Lottia gigantea]>gi|556097399|gb|ESO86051.1| hypothetical protein LOTGIDRAFT_235630 [Lottia gigantea]	961081515	XM_014913208.1	0	PREDICTED: Octopus bimaculoides uncharacterized LOC106868092 (LOC106868092), mRNA	--	--	--	--	--	--	--	--	--	--	--	--	--	--	--	--	--
Cluster-58773.181884	1405.77	4583.59	-1.7051	4.7001e-15	1119	762116184	XP_011440915.1	2.6e-24	PREDICTED: acidic phospholipase A2-like [Crassostrea gigas]	961071950	XM_014925368.1	0	PREDICTED: Octopus bimaculoides basic phospholipase A2 Ts-G6D49-like (LOC106876697), transcript variant X2, mRNA	--	--	--	--	C1JAR9	2.2e-21	Phospholipase A2 Scol/Pla OS=Scolopendra viridis PE=1 SV=1	PF08398	Parvovirus coat protein VP1	--	--	GO:0005198	structural molecule activity	GO:0019028	viral capsid	KOG4087	Phospholipase A2
Cluster-58773.185592	1593.87	5394.01	-1.7588	7.8613e-15	1701	443684652	ELT88524.1	4.7e-65	hypothetical protein CAPTEDRAFT_135197, partial [Capitella teleta]	961073214	XM_014929670.1	0	PREDICTED: Octopus bimaculoides uncharacterized LOC106879916 (LOC106879916), mRNA	--	--	--	--	--	--	--	PF03067	Chitin binding domain	--	--	--	--	GO:0019028	viral capsid	--	--
Cluster-58773.160865	771.533	2760.64	-1.8392	1.6471e-14	806	675369805	KFM62707.1	2.9e-09	Laminin subunit alpha-2, partial [Stegodyphus mimosarum]	961072884	XM_014928522.1	0	PREDICTED: Octopus bimaculoides uncharacterized LOC106879085 (LOC106879085), mRNA	--	--	--	--	--	--	--	PF03273//PF02881//PF01442//PF05791//PF04513//PF01817	Baculovirus gp64 envelope glycoprotein family//SRP54-type protein, helical bundle domain//Apolipoprotein A1/A4/E domain//Bacillus haemolytic enterotoxin (HBL)//Baculovirus polyhedron envelope protein, PEP, C terminus//Chorismate mutase type II	GO:0042157//GO:0009405//GO:0046417//GO:0006869//GO:0019048//GO:0006614	lipoprotein metabolic process//pathogenesis//chorismate metabolic process//lipid transport//modulation by virus of host morphology or physiology//SRP-dependent cotranslational protein targeting to membrane	GO:0005198//GO:0008289//GO:0005525	structural molecule activity//lipid binding//GTP binding	GO:0019028//GO:0019031//GO:0016020//GO:0005576	viral capsid//viral envelope//membrane//extracellular region	--	--
Cluster-58773.38315	128.779	754.366	-2.5504	1.7829e-13	880	780095614	XP_011674594.1	1.1e-33	PREDICTED: deleted in malignant brain tumors 1 protein-like, partial [Strongylocentrotus purpuratus]	961075118	XM_014934993.1	0	PREDICTED: Octopus bimaculoides scavenger receptor cysteine-rich type 1 protein M130-like (LOC106883854), mRNA	K09624	PRSS12	protease, serine, 12 (neurotrypsin, motopsin)	http://www.genome.jp/dbget-bin/www_bget?ko:K09624	Q5G267	1.3e-34	Neurotrypsin OS=Macaca mulatta GN=PRSS12 PE=3 SV=1	PF15494//PF00530//PF02325	Scavenger receptor cysteine-rich domain//Scavenger receptor cysteine-rich domain//YGGT family	GO:0007165	signal transduction	GO:0005044	scavenger receptor activity	GO:0016020	membrane	--	--
Cluster-58773.179893	3640.28	13782.7	-1.9207	3.093e-13	667	--	--	--	--	961075615	XM_014935158.1	0	PREDICTED: Octopus bimaculoides uncharacterized LOC106883995 (LOC106883995), mRNA	--	--	--	--	--	--	--	--	--	--	--	--	--	--	--	--	--
Cluster-58773.162110	893.961	2957.62	-1.7262	6.16e-13	1572	--	--	--	--	961072884	XM_014928522.1	0	PREDICTED: Octopus bimaculoides uncharacterized LOC106879085 (LOC106879085), mRNA	--	--	--	--	--	--	--	PF04513//PF01817//PF00214//PF03273//PF02881	Baculovirus polyhedron envelope protein, PEP, C terminus//Chorismate mutase type II//Calcitonin / CGRP / IAPP family//Baculovirus gp64 envelope glycoprotein family//SRP54-type protein, helical bundle domain	GO:0046417//GO:0007165//GO:0006614//GO:0019048	chorismate metabolic process//signal transduction//SRP-dependent cotranslational protein targeting to membrane//modulation by virus of host morphology or physiology	GO:0005179//GO:0005198//GO:0005525	hormone activity//structural molecule activity//GTP binding	GO:0019028//GO:0019031//GO:0005576	viral capsid//viral envelope//extracellular region	--	--
Cluster-58773.146985	266.243	1120.79	-2.0737	9.1363e-13	1003	762092086	XP_011428466.1	6.4e-46	PREDICTED: periostin-like [Crassostrea gigas]>gi|405960569|gb|EKC26483.1| Transforming growth factor-beta-induced protein ig-h3 [Crassostrea gigas]	961114993	XM_014924881.1	0	PREDICTED: Octopus bimaculoides periostin-like (LOC106876370), mRNA	--	--	--	--	Q15582	1.3e-14	Transforming growth factor-beta-induced protein ig-h3 OS=Homo sapiens GN=TGFBI PE=1 SV=1	--	--	--	--	--	--	--	--	--	--
Cluster-58773.180067	2302	6562.34	-1.5113	1.0861e-12	572	762149465	XP_011412673.1	6.5e-19	PREDICTED: peritrophin-44-like [Crassostrea gigas]>gi|405977497|gb|EKC41942.1| hypothetical protein CGI_10011118 [Crassostrea gigas]	--	--	--	--	--	--	--	--	--	--	--	PF01607//PF16525	Chitin binding Peritrophin-A domain//Haemophore, haem-binding	GO:0006030	chitin metabolic process	GO:0008061//GO:0020037	chitin binding//heme binding	GO:0005576	extracellular region	--	--
Cluster-58773.109327	26.097	221.711	-3.0867	1.365e-12	2014	762155897	XP_011416061.1	1.3e-82	PREDICTED: uncharacterized protein LOC105320006 [Crassostrea gigas]>gi|405967023|gb|EKC32237.1| Putative tyrosinase-like protein tyr-3 [Crassostrea gigas]	961075600	XM_014935153.1	0	PREDICTED: Octopus bimaculoides uncharacterized LOC106883990 (LOC106883990), partial mRNA	--	--	--	--	Q19673	1.2e-33	Putative tyrosinase-like protein tyr-3 OS=Caenorhabditis elegans GN=tyr-3 PE=3 SV=5	PF00264	Common central domain of tyrosinase	GO:0008152	metabolic process	GO:0016491	oxidoreductase activity	--	--	--	--
Cluster-58773.132528	2239.58	6366.72	-1.5073	1.5023e-12	312	--	--	--	--	--	--	--	--	--	--	--	--	--	--	--	--	--	--	--	--	--	--	--	--	--
Cluster-58773.181888	328.394	1434.5	-2.127	1.9803e-12	719	390358724	XP_003729324.1	1.1e-15	PREDICTED: acidic phospholipase A2 BpirPLA2-I [Strongylocentrotus purpuratus]	961071960	XM_014925392.1	0	PREDICTED: Octopus bimaculoides basic phospholipase A2 Ts-G6D49-like (LOC106876697), transcript variant X5, mRNA	--	--	--	--	C1JAR9	1.1e-15	Phospholipase A2 Scol/Pla OS=Scolopendra viridis PE=1 SV=1	PF06951//PF08398	Group XII secretory phospholipase A2 precursor (PLA2G12)//Parvovirus coat protein VP1	GO:0016042//GO:0009395	lipid catabolic process//phospholipid catabolic process	GO:0005509//GO:0005198//GO:0004623	calcium ion binding//structural molecule activity//phospholipase A2 activity	GO:0019028//GO:0005576	viral capsid//extracellular region	KOG4087	Phospholipase A2
Cluster-58773.69125	711.976	2473.8	-1.7968	2.2081e-12	1477	762116501	XP_011441088.1	4.1e-65	PREDICTED: collagen alpha-4(VI) chain-like [Crassostrea gigas]	961118709	XM_014926223.1	0	PREDICTED: Octopus bimaculoides collagen alpha-6(VI) chain-like (LOC106877343), mRNA	--	--	--	--	A6NMZ7	1.7e-42	Collagen alpha-6(VI) chain OS=Homo sapiens GN=COL6A6 PE=1 SV=2	PF13085	2Fe-2S iron-sulfur cluster binding domain	GO:0006118	obsolete electron transport	GO:0051536//GO:0009055	iron-sulfur cluster binding//electron carrier activity	--	--	--	--
Cluster-58773.117160	229.368	973.332	-2.0853	2.5475e-12	925	780132053	XP_011679402.1	4.5e-54	PREDICTED: deleted in malignant brain tumors 1 protein, partial [Strongylocentrotus purpuratus]	961075121	XM_014934994.1	0	PREDICTED: Octopus bimaculoides deleted in malignant brain tumors 1 protein-like (LOC106883855), mRNA	--	--	--	--	Q5G271	4.3e-52	Neurotrypsin OS=Pan troglodytes GN=PRSS12 PE=3 SV=1	PF09272//PF00530//PF15494	Hepsin, SRCR//Scavenger receptor cysteine-rich domain//Scavenger receptor cysteine-rich domain	GO:0007165	signal transduction	GO:0004252//GO:0005044//GO:0070008	serine-type endopeptidase activity//scavenger receptor activity//serine-type exopeptidase activity	GO:0016020	membrane	--	--
Cluster-58773.109990	430.35	1581.65	-1.8778	4.7084e-12	614	--	--	--	--	961075618	XM_014935159.1	0	PREDICTED: Octopus bimaculoides uncharacterized LOC106883997 (LOC106883997), mRNA	--	--	--	--	--	--	--	PF00093	von Willebrand factor type C domain	--	--	GO:0005515	protein binding	--	--	--	--
Cluster-58773.138034	518.617	2469.82	-2.2517	7.7646e-12	609	--	--	--	--	961092097	XM_014916897.1	2.01462e-98	PREDICTED: Octopus bimaculoides uncharacterized LOC106870726 (LOC106870726), mRNA	--	--	--	--	--	--	--	--	--	--	--	--	--	--	--	--	--
Cluster-58773.180255	696.923	3311.39	-2.2484	9.4268e-12	1019	--	--	--	--	961129017	XM_014929792.1	0	PREDICTED: Octopus bimaculoides uncharacterized LOC106880006 (LOC106880006), transcript variant X1, mRNA	--	--	--	--	--	--	--	--	--	--	--	--	--	--	--	--	--
Cluster-58773.138036	2097.45	10047.2	-2.2601	1.0646e-11	708	--	--	--	--	961092097	XM_014916897.1	2.15398e-163	PREDICTED: Octopus bimaculoides uncharacterized LOC106870726 (LOC106870726), mRNA	--	--	--	--	--	--	--	--	--	--	--	--	--	--	--	--	--
Cluster-58773.127224	7.3156	117.131	-4.001	1.4325e-11	428	676460157	XP_009055532.1	1.1e-15	hypothetical protein LOTGIDRAFT_209446 [Lottia gigantea]>gi|556105261|gb|ESO93913.1| hypothetical protein LOTGIDRAFT_209446 [Lottia gigantea]	961128807	XM_014929716.1	4.63905e-148	PREDICTED: Octopus bimaculoides zinc metalloproteinase nas-15-like (LOC106879956), mRNA	--	--	--	--	P55115	1.7e-06	Zinc metalloproteinase nas-15 OS=Caenorhabditis elegans GN=nas-15 PE=2 SV=2	PF01400	Astacin (Peptidase family M12A)	GO:0006508	proteolysis	GO:0004222	metalloendopeptidase activity	--	--	--	--
Cluster-58773.161234	506.205	2096.64	-2.0503	2.4407e-11	1840	676460842	XP_009055753.1	3.2e-99	hypothetical protein LOTGIDRAFT_215949 [Lottia gigantea]>gi|556104901|gb|ESO93553.1| hypothetical protein LOTGIDRAFT_215949 [Lottia gigantea]	961123128	XM_014927752.1	0	PREDICTED: Octopus bimaculoides inactive pancreatic lipase-related protein 1-like (LOC106878524), mRNA	K14074	PNLIPRP1, PLRP1	pancreatic lipase-related protein 1	http://www.genome.jp/dbget-bin/www_bget?ko:K14074	P54315	2.6e-72	Inactive pancreatic lipase-related protein 1 OS=Homo sapiens GN=PNLIPRP1 PE=1 SV=1	--	--	--	--	--	--	--	--	--	--
Cluster-58773.179191	7242.35	23836.5	-1.7186	2.4977e-11	1550	260818781	XP_002604561.1	5e-114	hypothetical protein BRAFLDRAFT_280591 [Branchiostoma floridae]>gi|229289888|gb|EEN60572.1| hypothetical protein BRAFLDRAFT_280591 [Branchiostoma floridae]	961142270	XM_014934400.1	0	PREDICTED: Octopus bimaculoides legumain-like (LOC106883408), partial mRNA	K01369	LGMN	legumain	http://www.genome.jp/dbget-bin/www_bget?ko:K01369	Q9R0J8	1.2e-107	Legumain OS=Rattus norvegicus GN=Lgmn PE=1 SV=1	PF01650	Peptidase C13 family	GO:0006508	proteolysis	GO:0008233	peptidase activity	--	--	KOG1349	Gpi-anchor transamidase
Cluster-58773.135695	588.463	1941.84	-1.7224	2.5454e-11	635	283837550	BAI66447.1	7.3e-72	serine protease 1 [Heterololigo bleekeri]	961139148	XM_014933316.1	3.4496e-111	PREDICTED: Octopus bimaculoides chymotrypsin-1-like (LOC106882587), mRNA	--	--	--	--	P40313	4.6e-29	Chymotrypsin-like protease CTRL-1 OS=Homo sapiens GN=CTRL PE=2 SV=1	PF00089	Trypsin	GO:0006508	proteolysis	GO:0004252	serine-type endopeptidase activity	--	--	--	--
Cluster-58773.145423	591.259	2957.81	-2.3227	2.7012e-11	919	762154995	XP_011415586.1	1.8e-34	PREDICTED: transforming growth factor-beta-induced protein ig-h3-like [Crassostrea gigas]>gi|405972547|gb|EKC37310.1| Transforming growth factor-beta-induced protein ig-h3 [Crassostrea gigas]	961114995	XM_014924882.1	5.15208e-101	PREDICTED: Octopus bimaculoides stabilin-2-like (LOC106876371), mRNA	--	--	--	--	Q8R4U0	9.4e-15	Stabilin-2 OS=Mus musculus GN=Stab2 PE=1 SV=1	--	--	--	--	--	--	--	--	--	--
Cluster-58773.127225	1165.88	3712.44	-1.6709	2.7616e-11	786	676460157	XP_009055532.1	3e-59	hypothetical protein LOTGIDRAFT_209446 [Lottia gigantea]>gi|556105261|gb|ESO93913.1| hypothetical protein LOTGIDRAFT_209446 [Lottia gigantea]	961128807	XM_014929716.1	0	PREDICTED: Octopus bimaculoides zinc metalloproteinase nas-15-like (LOC106879956), mRNA	--	--	--	--	P55115	2.8e-44	Zinc metalloproteinase nas-15 OS=Caenorhabditis elegans GN=nas-15 PE=2 SV=2	PF01400//PF00413	Astacin (Peptidase family M12A)//Matrixin	GO:0006508	proteolysis	GO:0008270//GO:0004222	zinc ion binding//metalloendopeptidase activity	GO:0031012	extracellular matrix	KOG3714	Meprin A metalloprotease
Cluster-58773.47482	348.593	1274.54	-1.8704	3.0043e-11	714	443711424	ELU05212.1	2.1e-06	hypothetical protein CAPTEDRAFT_211623 [Capitella teleta]	--	--	--	--	--	--	--	--	--	--	--	PF13833//PF13202//PF13499//PF13405//PF10591//PF05480//PF00036	EF-hand domain pair//EF hand//EF-hand domain pair//EF-hand domain//Secreted protein acidic and rich in cysteine Ca binding region//Staphylococcus haemolytic protein//EF hand	GO:0007165//GO:0009405	signal transduction//pathogenesis	GO:0005509	calcium ion binding	GO:0005578	proteinaceous extracellular matrix	--	--
Cluster-58773.191042	448.44	1679.02	-1.9046	5.121e-11	538	871205606	XP_012935252.1	2.5e-12	PREDICTED: peritrophin-1-like [Aplysia californica]	961089968	XM_014916155.1	3.66355e-125	PREDICTED: Octopus bimaculoides uncharacterized LOC106870155 (LOC106870155), mRNA	--	--	--	--	--	--	--	PF01607	Chitin binding Peritrophin-A domain	GO:0006030	chitin metabolic process	GO:0008061	chitin binding	GO:0005576	extracellular region	--	--
Cluster-58773.157033	1422.22	3993.31	-1.4894	6.3449e-11	3031	762135132	XP_011450810.1	1.3e-171	PREDICTED: neuroendocrine convertase 1-like isoform X5 [Crassostrea gigas]	961109887	XM_014923026.1	0	PREDICTED: Octopus bimaculoides neuroendocrine convertase 1-like (LOC106875064), mRNA	K01359	PCSK1	proprotein convertase subtilisin/kexin type 1	http://www.genome.jp/dbget-bin/www_bget?ko:K01359	P29120	1.1e-165	Neuroendocrine convertase 1 OS=Homo sapiens GN=PCSK1 PE=1 SV=2	PF01483//PF00082	Proprotein convertase P-domain//Subtilase family	GO:0006508	proteolysis	GO:0004252	serine-type endopeptidase activity	--	--	KOG3525	Subtilisin-like proprotein convertase
Cluster-58773.119417	2944.78	7618.6	-1.3714	9.04e-11	1204	336455288	AEI59124.1	2.8e-19	cysteine proteases inhibitor [Haliotis discus hannai]	961075974	XR_001411194.1	8.49475e-125	PREDICTED: Octopus bimaculoides uncharacterized LOC106884064 (LOC106884064), ncRNA	--	--	--	--	Q7M429	2e-09	L-cystatin OS=Tachypleus tridentatus PE=1 SV=1	PF00031	Cystatin domain	--	--	GO:0004869	cysteine-type endopeptidase inhibitor activity	--	--	--	--
Cluster-58773.252310	0.0001	27.8498	-18.0873	2.4969e-10	6442	762078874	XP_011456241.1	9.1e-85	PREDICTED: sperm-associated antigen 17-like isoform X9 [Crassostrea gigas]	961068349	XM_014912939.1	0	PREDICTED: Octopus bimaculoides sperm-associated antigen 17-like (LOC106867864), transcript variant X4, mRNA	--	--	--	--	Q5S003	3.2e-69	Sperm-associated antigen 17 OS=Mus musculus GN=Spag17 PE=1 SV=2	PF01787	Ilarvirus coat protein	GO:0006413	translational initiation	GO:0003723	RNA binding	GO:0019012	virion	--	--
Cluster-58773.163428	317.505	1138.08	-1.8417	2.6331e-10	338	405974136	EKC38804.1	4.8e-14	Putative chitinase 3 [Crassostrea gigas]	961092213	XM_014916938.1	2.12555e-155	PREDICTED: Octopus bimaculoides chitotriosidase-1-like (LOC106870747), mRNA	--	--	--	--	Q9D7Q1	4.2e-13	Chitotriosidase-1 OS=Mus musculus GN=Chit1 PE=1 SV=2	PF01607//PF00704	Chitin binding Peritrophin-A domain//Glycosyl hydrolases family 18	GO:0005975//GO:0006030	carbohydrate metabolic process//chitin metabolic process	GO:0008061//GO:0004553	chitin binding//hydrolase activity, hydrolyzing O-glycosyl compounds	GO:0005576	extracellular region	KOG2806	Chitinase
Cluster-58773.113564	361.423	1776.12	-2.297	3.0366e-10	2494	595744435	AHM92582.1	1.2e-133	chitotriosidase [Euprymna scolopes]	961071618	XM_014924159.1	0	PREDICTED: Octopus bimaculoides chitotriosidase-1-like (LOC106875857), mRNA	--	--	--	--	Q6RY07	4.8e-114	Acidic mammalian chitinase OS=Rattus norvegicus GN=Chia PE=2 SV=1	PF01607//PF07525//PF00704	Chitin binding Peritrophin-A domain//SOCS box//Glycosyl hydrolases family 18	GO:0006030//GO:0035556//GO:0005975	chitin metabolic process//intracellular signal transduction//carbohydrate metabolic process	GO:0004553//GO:0008061	hydrolase activity, hydrolyzing O-glycosyl compounds//chitin binding	GO:0005576	extracellular region	KOG2806	Chitinase
Cluster-58773.178194	101.015	468.554	-2.2136	3.7037e-10	1110	--	--	--	--	961141689	XM_014934198.1	0	PREDICTED: Octopus bimaculoides uncharacterized LOC106883259 (LOC106883259), transcript variant X3, mRNA	--	--	--	--	--	--	--	--	--	--	--	--	--	--	--	--	--
Cluster-58773.163425	85.9566	415.088	-2.2717	3.9703e-10	893	762102165	XP_011433571.1	9.6e-78	PREDICTED: probable chitinase 3 [Crassostrea gigas]	961092204	XM_014916934.1	0	PREDICTED: Octopus bimaculoides chitotriosidase-1-like (LOC106870744), mRNA	--	--	--	--	Q13231	5.3e-71	Chitotriosidase-1 OS=Homo sapiens GN=CHIT1 PE=1 SV=1	PF00704	Glycosyl hydrolases family 18	GO:0005975	carbohydrate metabolic process	GO:0004553	hydrolase activity, hydrolyzing O-glycosyl compounds	--	--	KOG2806	Chitinase
Cluster-58773.132079	33.3267	677.565	-4.3456	4.2508e-10	1100	557026740	XP_006013482.1	9.6e-104	PREDICTED: inositol oxygenase [Latimeria chalumnae]	961089521	XM_014915996.1	0	PREDICTED: Octopus bimaculoides inositol oxygenase-like (LOC106870030), mRNA	--	--	--	--	Q5REY9	1.1e-102	Inositol oxygenase OS=Pongo abelii GN=MIOX PE=2 SV=1	PF05153	Myo-inositol oxygenase	GO:0055114//GO:0019310	oxidation-reduction process//inositol catabolic process	GO:0050113//GO:0005506	inositol oxygenase activity//iron ion binding	GO:0005737	cytoplasm	--	--
Cluster-58773.155848	0.390086	54.3684	-7.1228	5.6179e-10	270	--	--	--	--	--	--	--	--	--	--	--	--	--	--	--	--	--	--	--	--	--	--	--	--	--
Cluster-58773.179190	305.448	1155.23	-1.9192	5.6513e-10	627	56388620	AAH87708.1	2.1e-79	Legumain [Rattus norvegicus]>gi|149025377|gb|EDL81744.1| legumain, isoform CRA_a [Rattus norvegicus]	961142270	XM_014934400.1	0	PREDICTED: Octopus bimaculoides legumain-like (LOC106883408), partial mRNA	--	--	--	--	Q9R0J8	8.8e-81	Legumain OS=Rattus norvegicus GN=Lgmn PE=1 SV=1	PF00656//PF01650//PF00895	Caspase domain//Peptidase C13 family//ATP synthase protein 8	GO:0015986//GO:0006508//GO:0040015//GO:0001101//GO:0015992//GO:0043524	ATP synthesis coupled proton transport//proteolysis//negative regulation of multicellular organism growth//response to acid chemical//proton transport//negative regulation of neuron apoptotic process	GO:0008233//GO:0015078//GO:0004197	peptidase activity//hydrogen ion transmembrane transporter activity//cysteine-type endopeptidase activity	GO:0000276//GO:0005770//GO:0005764//GO:0045177	mitochondrial proton-transporting ATP synthase complex, coupling factor F(o)//late endosome//lysosome//apical part of cell	KOG1349	Gpi-anchor transamidase
Cluster-58773.177608	859.231	2906.06	-1.7579	7.5423e-10	765	34979807	AAQ83892.1	3.4e-47	interferon gamma-inducible protein 30 [Branchiostoma belcheri tsingtauense]	961103175	XM_014920706.1	0	PREDICTED: Octopus bimaculoides gamma-interferon-inducible lysosomal thiol reductase-like (LOC106873375), mRNA	K08059	IFI30, GILT	interferon, gamma-inducible protein 30	http://www.genome.jp/dbget-bin/www_bget?ko:K08059	A6QPN6	6.4e-25	Gamma-interferon-inducible lysosomal thiol reductase OS=Bos taurus GN=IFI30 PE=2 SV=1	--	--	--	--	--	--	--	--	--	--
Cluster-58773.128329	202.337	772.32	-1.9324	8.3639e-10	671	--	--	--	--	961093514	XM_014917380.1	5.58059e-174	PREDICTED: Octopus bimaculoides uncharacterized LOC106871090 (LOC106871090), transcript variant X2, mRNA	--	--	--	--	--	--	--	--	--	--	--	--	--	--	--	--	--
Cluster-58773.140831	723.728	2176.83	-1.5887	8.7173e-10	690	676441940	XP_009049647.1	2.1e-40	hypothetical protein LOTGIDRAFT_238761 [Lottia gigantea]>gi|556111034|gb|ESO99685.1| hypothetical protein LOTGIDRAFT_238761 [Lottia gigantea]	961078913	XR_001409144.1	8.50383e-78	PREDICTED: Octopus bimaculoides uncharacterized LOC106867424 (LOC106867424), ncRNA	--	--	--	--	P81439	2e-09	Equistatin OS=Actinia equina PE=1 SV=1	PF14865	Macin	GO:0006952	defense response	--	--	--	--	--	--
Cluster-58773.140087	311.596	1072.42	-1.7831	1.2782e-09	606	291242935	XP_002741349.1	1.1e-27	PREDICTED: epididymal secretory protein E1-like [Saccoglossus kowalevskii]	--	--	--	--	--	--	--	--	Q9VQ62	1.7e-25	Protein NPC2 homolog OS=Drosophila melanogaster GN=Npc2a PE=2 SV=1	PF09171	Domain of unknown function (DUF1886)	GO:0006284	base-excision repair	GO:0016799//GO:0003906	hydrolase activity, hydrolyzing N-glycosyl compounds//DNA-(apurinic or apyrimidinic site) lyase activity	--	--	--	--
Cluster-58773.113210	310.446	1116.65	-1.8468	1.2834e-09	2266	676434770	XP_009047338.1	3.5e-116	hypothetical protein LOTGIDRAFT_111301, partial [Lottia gigantea]>gi|556113528|gb|ESP02180.1| hypothetical protein LOTGIDRAFT_111301, partial [Lottia gigantea]	961081242	XM_014913116.1	0	PREDICTED: Octopus bimaculoides ammonium transporter Rh type B-like (LOC106868020), partial mRNA	--	--	--	--	Q6XL41	8.3e-105	Ammonium transporter Rh type C OS=Gallus gallus GN=RHCG PE=2 SV=1	PF00909	Ammonium Transporter Family	GO:0015696	ammonium transport	GO:0008519	ammonium transmembrane transporter activity	GO:0016020	membrane	KOG3796	Ammonium transporter RHBG
Cluster-58773.158098	2205.2	6278.62	-1.5095	1.3304e-09	1363	147900644	NP_001088499.1	3.8e-65	carboxypeptidase A1 (pancreatic) precursor [Xenopus laevis]>gi|54311498|gb|AAH84831.1| LOC495367 protein [Xenopus laevis]	961102166	XM_014920349.1	0	PREDICTED: Octopus bimaculoides carboxypeptidase A2-like (LOC106873122), partial mRNA	--	--	--	--	P19222	4.4e-61	Carboxypeptidase A2 OS=Rattus norvegicus GN=Cpa2 PE=1 SV=1	PF02244//PF00246	Carboxypeptidase activation peptide//Zinc carboxypeptidase	GO:0006508	proteolysis	GO:0008270//GO:0004180//GO:0004181	zinc ion binding//carboxypeptidase activity//metallocarboxypeptidase activity	--	--	KOG2650	Zinc carboxypeptidase
Cluster-58773.160453	0.0001	74.2024	-19.5011	1.6271e-09	1528	688593276	XP_009291038.1	2.3e-111	PREDICTED: uncharacterized protein LOC100537186 [Danio rerio]	961100155	XM_014919638.1	0	PREDICTED: Octopus bimaculoides uncharacterized LOC106872601 (LOC106872601), mRNA	--	--	--	--	--	--	--	--	--	--	--	--	--	--	--	--	--
Cluster-58773.179864	2.51779	58.6462	-4.5418	2.7865e-09	685	--	--	--	--	--	--	--	--	--	--	--	--	--	--	--	PF17122	Zinc-finger	--	--	GO:0008270//GO:0005515	zinc ion binding//protein binding	--	--	--	--
Cluster-58773.179181	397.12	1297.37	-1.7079	2.7865e-09	750	260818781	XP_002604561.1	9.7e-31	hypothetical protein BRAFLDRAFT_280591 [Branchiostoma floridae]>gi|229289888|gb|EEN60572.1| hypothetical protein BRAFLDRAFT_280591 [Branchiostoma floridae]	961084389	XR_001409330.1	1.56417e-70	PREDICTED: Octopus bimaculoides uncharacterized LOC106868778 (LOC106868778), ncRNA	--	--	--	--	Q99538	1.3e-25	Legumain OS=Homo sapiens GN=LGMN PE=1 SV=1	PF01650	Peptidase C13 family	GO:0006508	proteolysis	GO:0008233	peptidase activity	--	--	--	--
Cluster-58773.132048	4138.79	9944.41	-1.2647	2.7865e-09	450	196002275	XP_002111005.1	8.6e-51	expressed hypothetical protein [Trichoplax adhaerens]>gi|190586956|gb|EDV27009.1| expressed hypothetical protein [Trichoplax adhaerens]	961087008	XM_014915124.1	2.3376e-126	PREDICTED: Octopus bimaculoides cathepsin L1-like (LOC106869401), mRNA	--	--	--	--	Q26636	1.3e-46	Cathepsin L OS=Sarcophaga peregrina PE=1 SV=1	PF03051//PF00112	Peptidase C1-like family//Papain family cysteine protease	GO:0006508	proteolysis	GO:0004197//GO:0008234	cysteine-type endopeptidase activity//cysteine-type peptidase activity	--	--	KOG1543	Cysteine proteinase Cathepsin L
Cluster-58773.174506	1026.33	3382.28	-2.9553	3.2151e-09	974	--	--	--	--	961127745	XM_014929353.1	0	PREDICTED: Octopus bimaculoides uncharacterized LOC106879678 (LOC106879678), mRNA	--	--	--	--	--	--	--	PF00811	Ependymin	--	--	--	--	--	--	--	--
Cluster-58773.83743	963.687	7474.05	-1.7205	3.2151e-09	378	--	--	--	--	--	--	--	--	--	--	--	--	--	--	--	--	--	GO:0007160	cell-matrix adhesion	GO:0005509	calcium ion binding	GO:0005576	extracellular region	--	--
Cluster-58773.132046	743.509	2228.54	-1.5837	3.4575e-09	708	492370606	AGL33705.1	1.6e-88	cathepsin L2 [Sinonovacula constricta]	961087008	XM_014915124.1	0	PREDICTED: Octopus bimaculoides cathepsin L1-like (LOC106869401), mRNA	K01365	CTSL	cathepsin L	http://www.genome.jp/dbget-bin/www_bget?ko:K01365	Q26636	5.8e-73	Cathepsin L OS=Sarcophaga peregrina PE=1 SV=1	PF03051//PF00112	Peptidase C1-like family//Papain family cysteine protease	GO:0006508	proteolysis	GO:0004197//GO:0008234	cysteine-type endopeptidase activity//cysteine-type peptidase activity	--	--	KOG1543	Cysteine proteinase Cathepsin L
Cluster-58773.133005	1354.39	3615.72	-1.4166	3.682e-09	569	--	--	--	--	961109357	XM_014922843.1	0	PREDICTED: Octopus bimaculoides uncharacterized LOC106874926 (LOC106874926), mRNA	--	--	--	--	--	--	--	--	--	--	--	--	--	--	--	--	--
Cluster-58773.153740	0.341242	49.7167	-7.1868	3.7291e-09	677	--	--	--	--	--	--	--	--	--	--	--	--	--	--	--	PF04889//PF09026//PF15761	Cwf15/Cwc15 cell cycle control protein//Centromere protein B dimerisation domain//Immortalisation up-regulated protein	GO:0006355//GO:0000398	regulation of transcription, DNA-templated//mRNA splicing, via spliceosome	GO:0003682//GO:0003677	chromatin binding//DNA binding	GO:0005634//GO:0000775//GO:0000785//GO:0005681	nucleus//chromosome, centromeric region//chromatin//spliceosomal complex	--	--
Cluster-58773.173973	131.195	526.003	-2.0034	5.15e-09	705	676485144	XP_009063566.1	1.4e-42	hypothetical protein LOTGIDRAFT_130303, partial [Lottia gigantea]>gi|556097185|gb|ESO85837.1| hypothetical protein LOTGIDRAFT_130303, partial [Lottia gigantea]	961132073	XM_014930866.1	4.98208e-110	PREDICTED: Octopus bimaculoides chitotriosidase-1-like (LOC106880768), partial mRNA	--	--	--	--	Q95M17	1.1e-31	Acidic mammalian chitinase OS=Bos taurus GN=CHIA PE=1 SV=1	PF00704//PF01607	Glycosyl hydrolases family 18//Chitin binding Peritrophin-A domain	GO:0005975//GO:0006030	carbohydrate metabolic process//chitin metabolic process	GO:0008061//GO:0004553	chitin binding//hydrolase activity, hydrolyzing O-glycosyl compounds	GO:0005576	extracellular region	KOG2806	Chitinase
Cluster-58773.144901	157.756	601.835	-1.9317	6.1347e-09	512	443684652	ELT88524.1	9.2e-49	hypothetical protein CAPTEDRAFT_135197, partial [Capitella teleta]	961073211	XM_014929659.1	0	PREDICTED: Octopus bimaculoides uncharacterized LOC106879907 (LOC106879907), mRNA	--	--	--	--	--	--	--	PF03067	Chitin binding domain	--	--	--	--	GO:0019028	viral capsid	--	--
Cluster-58773.233734	16.3666	133.782	-3.0311	6.6372e-09	298	780099492	XP_011675059.1	7.5e-19	PREDICTED: scavenger receptor cysteine-rich domain-containing group B protein [Strongylocentrotus purpuratus]	--	--	--	--	--	--	--	--	G3V801	5.9e-19	Neurotrypsin OS=Rattus norvegicus GN=Prss12 PE=1 SV=1	PF00530//PF15494	Scavenger receptor cysteine-rich domain//Scavenger receptor cysteine-rich domain	GO:0007165	signal transduction	GO:0005044	scavenger receptor activity	GO:0016020	membrane	--	--
Cluster-58773.86296	0.0001	21.9134	-17.7415	8.8994e-09	1173	871210934	XP_012944525.1	7.3e-33	PREDICTED: uncharacterized protein LOC101862702 isoform X1 [Aplysia californica]	961126307	XM_014928852.1	0	PREDICTED: Octopus bimaculoides UBX domain-containing protein 1-like (LOC106879342), partial mRNA	--	--	--	--	Q6NXA9	5e-13	UBX domain-containing protein 1 OS=Danio rerio GN=ubxn1 PE=2 SV=1	PF04636//PF00789//PF11744	PA26 p53-induced protein (sestrin)//UBX domain//Aluminium activated malate transporter	GO:1901031//GO:0015743	regulation of response to reactive oxygen species//malate transport	GO:0005515	protein binding	GO:0005634	nucleus	KOG2689	Predicted ubiquitin regulatory protein
Cluster-58773.129608	227.904	899.417	-1.9806	8.9569e-09	369	--	--	--	--	--	--	--	--	--	--	--	--	--	--	--	PF00050//PF07648	Kazal-type serine protease inhibitor domain//Kazal-type serine protease inhibitor domain	--	--	GO:0005515	protein binding	--	--	--	--
Cluster-58773.39174	1246.18	3312.1	-1.4102	9.2971e-09	955	676484289	XP_009063298.1	6.7e-77	hypothetical protein LOTGIDRAFT_235630 [Lottia gigantea]>gi|556097399|gb|ESO86051.1| hypothetical protein LOTGIDRAFT_235630 [Lottia gigantea]	961108301	XM_014922480.1	0	PREDICTED: Octopus bimaculoides uncharacterized LOC106874678 (LOC106874678), mRNA	--	--	--	--	--	--	--	--	--	--	--	--	--	--	--	--	--
Cluster-58773.141511	1.6577	328.844	-7.6321	1.9231e-08	4624	762137694	XP_011452142.1	3.6e-128	PREDICTED: rap1 GTPase-activating protein 1-like isoform X2 [Crassostrea gigas]	961142692	XM_014934550.1	0	PREDICTED: Octopus bimaculoides rap1 GTPase-activating protein 1-like (LOC106883520), partial mRNA	--	--	--	--	P47736	2.4e-103	Rap1 GTPase-activating protein 1 OS=Homo sapiens GN=RAP1GAP PE=1 SV=2	PF09726//PF02183//PF15070//PF02145//PF02166//PF04111//PF15202//PF02188//PF06005	Transmembrane protein//Homeobox associated leucine zipper//Putative golgin subfamily A member 2-like protein 5//Rap/ran-GAP//Androgen receptor//Autophagy protein Apg6//Adipogenin//GoLoco motif//Protein of unknown function (DUF904)	GO:0007165//GO:0000917//GO:0043093//GO:0006355//GO:0051056//GO:0030521//GO:0006914//GO:0045444	signal transduction//barrier septum assembly//FtsZ-dependent cytokinesis//regulation of transcription, DNA-templated//regulation of small GTPase mediated signal transduction//androgen receptor signaling pathway//autophagy//fat cell differentiation	GO:0030695//GO:0003700//GO:0005096//GO:0004882//GO:0003677//GO:0005496//GO:0043565	GTPase regulator activity//transcription factor activity, sequence-specific DNA binding//GTPase activator activity//androgen receptor activity//DNA binding//steroid binding//sequence-specific DNA binding	GO:0005794//GO:0005737//GO:0005634//GO:0016021//GO:0005667	Golgi apparatus//cytoplasm//nucleus//integral component of membrane//transcription factor complex	KOG3686	Rap1-GTPase-activating protein (Rap1GAP)
Cluster-58773.173980	31.9756	187.697	-2.5534	2.1986e-08	562	355329697	BAL14142.1	1.1e-50	chitinase 2 [Pagrus major]	961132073	XM_014930866.1	6.60667e-103	PREDICTED: Octopus bimaculoides chitotriosidase-1-like (LOC106880768), partial mRNA	K01183	E3.2.1.14	chitinase	http://www.genome.jp/dbget-bin/www_bget?ko:K01183	Q13231	2.1e-49	Chitotriosidase-1 OS=Homo sapiens GN=CHIT1 PE=1 SV=1	PF00704	Glycosyl hydrolases family 18	GO:0005975	carbohydrate metabolic process	GO:0004553	hydrolase activity, hydrolyzing O-glycosyl compounds	--	--	KOG2806	Chitinase
Cluster-58773.185697	2283.63	5702.54	-1.3203	2.9654e-08	556	--	--	--	--	--	--	--	--	--	--	--	--	--	--	--	--	--	--	--	--	--	--	--	--	--
Cluster-58773.118898	1695.29	5065.82	-1.5793	3.0164e-08	532	762092088	XP_011428468.1	4.3e-17	PREDICTED: transforming growth factor-beta-induced protein ig-h3-like [Crassostrea gigas]>gi|405960571|gb|EKC26485.1| Transforming growth factor-beta-induced protein ig-h3 [Crassostrea gigas]	961114995	XM_014924882.1	5.80569e-153	PREDICTED: Octopus bimaculoides stabilin-2-like (LOC106876371), mRNA	--	--	--	--	P55906	5.8e-09	Transforming growth factor-beta-induced protein ig-h3 OS=Bos taurus GN=TGFBI PE=1 SV=2	PF07660//PF02805	Secretin and TonB N terminus short domain//Metal binding domain of Ada	GO:0006281//GO:0006355	DNA repair//regulation of transcription, DNA-templated	GO:0003677//GO:0008270//GO:0008168	DNA binding//zinc ion binding//methyltransferase activity	GO:0019867	outer membrane	--	--
Cluster-58773.199707	42.9053	309.405	-2.8503	4.7128e-08	2769	762145363	XP_011455958.1	2.3e-263	PREDICTED: heat shock protein 70 B2-like [Crassostrea gigas]>gi|405964547|gb|EKC30018.1| Heat shock protein 70 B2 [Crassostrea gigas]	562816233	KF195923.1	0	Octopus vulgaris heat shock protein 70 (HSP70) mRNA, complete cds	--	--	--	--	P41827	2.4e-255	Heat shock protein 70 B2 OS=Anopheles albimanus GN=HSP70B2 PE=3 SV=1	PF01968//PF05699//PF06964//PF12019//PF02782//PF06723	Hydantoinase/oxoprolinase//hAT family C-terminal dimerisation region//Alpha-L-arabinofuranosidase C-terminus//Type II transport protein GspH//FGGY family of carbohydrate kinases, C-terminal domain//MreB/Mbl protein	GO:0005975//GO:0015031//GO:0046373//GO:0000902//GO:0015628//GO:0009117	carbohydrate metabolic process//protein transport//L-arabinose metabolic process//cell morphogenesis//protein secretion by the type II secretion system//nucleotide metabolic process	GO:0046556//GO:0046983//GO:0016787//GO:0016773//GO:0008565	alpha-L-arabinofuranosidase activity//protein dimerization activity//hydrolase activity//phosphotransferase activity, alcohol group as acceptor//protein transporter activity	GO:0015627	type II protein secretion system complex	KOG0101	Molecular chaperones HSP70/HSC70, HSP70 superfamily
Cluster-58773.178637	35.5167	194.084	-2.4501	6.2886e-08	966	451173798	AGF33810.1	9e-106	astacin-like metalloprotease [Sepiella maindroni]	961100726	XM_014919841.1	0	PREDICTED: Octopus bimaculoides meprin A subunit alpha-like (LOC106872749), mRNA	--	--	--	--	Q16819	1.5e-34	Meprin A subunit alpha OS=Homo sapiens GN=MEP1A PE=1 SV=2	PF00629//PF01400	MAM domain, meprin/A5/mu//Astacin (Peptidase family M12A)	GO:0006508	proteolysis	GO:0004222	metalloendopeptidase activity	GO:0016020	membrane	KOG3714	Meprin A metalloprotease
Cluster-58773.83742	1351.23	4965.29	-1.8776	7.8224e-08	1278	--	--	--	--	--	--	--	--	--	--	--	--	--	--	--	--	--	--	--	--	--	--	--	--	--
Cluster-58773.174326	122.554	478.121	-1.964	8.5445e-08	617	195999794	XP_002109765.1	6.1e-23	expressed hypothetical protein [Trichoplax adhaerens]>gi|190587889|gb|EDV27931.1| expressed hypothetical protein [Trichoplax adhaerens]	961075971	XM_014935279.1	0	PREDICTED: Octopus bimaculoides ecdysteroid-regulated 16 kDa protein-like (LOC106884063), mRNA	--	--	--	--	Q25481	3.2e-19	Ecdysteroid-regulated 16 kDa protein OS=Manduca sexta GN=ESR16 PE=2 SV=1	--	--	--	--	--	--	--	--	--	--
Cluster-58773.212365	201.448	686.023	-1.7678	1.0926e-07	545	762116501	XP_011441088.1	5.1e-21	PREDICTED: collagen alpha-4(VI) chain-like [Crassostrea gigas]	961116978	XM_014925627.1	0	PREDICTED: Octopus bimaculoides cartilage matrix protein-like (LOC106876883), mRNA	--	--	--	--	A2AX52	1.7e-16	Collagen alpha-4(VI) chain OS=Mus musculus GN=Col6a4 PE=1 SV=2	--	--	--	--	--	--	--	--	--	--
Cluster-58773.163431	596.863	1654.24	-1.4707	1.27e-07	476	405974136	EKC38804.1	1.1e-08	Putative chitinase 3 [Crassostrea gigas]	961092213	XM_014916938.1	6.47964e-172	PREDICTED: Octopus bimaculoides chitotriosidase-1-like (LOC106870747), mRNA	--	--	--	--	--	--	--	PF01607	Chitin binding Peritrophin-A domain	GO:0006030	chitin metabolic process	GO:0008061	chitin binding	GO:0005576	extracellular region	--	--
Cluster-58773.163191	102.442	411.485	-2.006	1.2726e-07	300	--	--	--	--	961083089	XR_001409299.1	7.4416e-80	PREDICTED: Octopus bimaculoides uncharacterized LOC106868468 (LOC106868468), ncRNA	--	--	--	--	--	--	--	--	--	--	--	--	--	--	--	--	--
Cluster-58773.247167	241.384	784.375	-1.7002	1.2907e-07	1625	595744435	AHM92582.1	2e-105	chitotriosidase [Euprymna scolopes]	961106707	XM_014921926.1	0	PREDICTED: Octopus bimaculoides chitotriosidase-1-like (LOC106874265), mRNA	--	--	--	--	Q13231	1.6e-97	Chitotriosidase-1 OS=Homo sapiens GN=CHIT1 PE=1 SV=1	PF05365//PF00704	Ubiquinol-cytochrome C reductase, UQCRX/QCR9 like//Glycosyl hydrolases family 18	GO:0006122//GO:0005975	mitochondrial electron transport, ubiquinol to cytochrome c//carbohydrate metabolic process	GO:0004553	hydrolase activity, hydrolyzing O-glycosyl compounds	GO:0005743//GO:0005750	mitochondrial inner membrane//mitochondrial respiratory chain complex III	KOG2806	Chitinase
Cluster-58773.56132	155.128	541.609	-1.8038	1.582e-07	2352	871233387	XP_012938109.1	2.8e-145	PREDICTED: uncharacterized protein LOC101859330 [Aplysia californica]	961123565	XM_014927906.1	0	PREDICTED: Octopus bimaculoides uncharacterized LOC106878628 (LOC106878628), mRNA	--	--	--	--	--	--	--	PF01349	Flavivirus non-structural protein NS4B	GO:0006396//GO:0006144//GO:0006370//GO:0009451	RNA processing//purine nucleobase metabolic process//7-methylguanosine mRNA capping//RNA modification	GO:0017111//GO:0016817//GO:0070008//GO:0004252//GO:0003968//GO:0004482//GO:0004483	nucleoside-triphosphatase activity//hydrolase activity, acting on acid anhydrides//serine-type exopeptidase activity//serine-type endopeptidase activity//RNA-directed RNA polymerase activity//mRNA (guanine-N7-)-methyltransferase activity//mRNA (nucleoside-2'-O-)-methyltransferase activity	GO:0031379	RNA-directed RNA polymerase complex	--	--
Cluster-58773.167086	132.9	503.559	-1.9218	1.9515e-07	716	733387118	AIZ97492.1	2.4e-79	putative chitotriosidase [Euprymna scolopes]	961075566	XM_014935140.1	0	PREDICTED: Octopus bimaculoides acidic mammalian chitinase-like (LOC106883980), mRNA	--	--	--	--	Q95M17	8.8e-53	Acidic mammalian chitinase OS=Bos taurus GN=CHIA PE=1 SV=1	PF00704	Glycosyl hydrolases family 18	GO:0005975	carbohydrate metabolic process	GO:0004553	hydrolase activity, hydrolyzing O-glycosyl compounds	--	--	KOG2806	Chitinase
Cluster-58773.182396	563.057	1592.23	-1.4997	2.0875e-07	2047	815792129	XP_012216650.1	6.7e-58	PREDICTED: papilin isoform X3 [Linepithema humile]	961101403	XM_014920084.1	0	PREDICTED: Octopus bimaculoides papilin-like (LOC106872908), mRNA	--	--	--	--	Q868Z9	6.4e-56	Papilin OS=Drosophila melanogaster GN=Ppn PE=1 SV=2	PF05986	ADAM-TS Spacer 1	--	--	GO:0004222	metalloendopeptidase activity	GO:0031012	extracellular matrix	KOG3538	Disintegrin metalloproteinases with thrombospondin repeats
Cluster-58773.178191	103.221	408.242	-1.9837	2.0987e-07	1212	--	--	--	--	961141684	XR_001411104.1	0	PREDICTED: Octopus bimaculoides uncharacterized LOC106883259 (LOC106883259), transcript variant X1, misc_RNA	--	--	--	--	--	--	--	--	--	--	--	--	--	--	--	--	--
Cluster-58773.181928	170.503	600.926	-1.8174	2.4257e-07	531	23598405	AAN35173.1	1.5e-25	ganglioside GM2 activator precursor [Euprymna scolopes]	--	--	--	--	--	--	--	--	--	--	--	--	--	--	--	--	--	--	--	--	--
Cluster-58773.108885	1459.12	6486.76	-2.1524	2.5079e-07	3588	667467110	B3EWZ9.1	5.5e-281	RecName: Full=Hephaestin-like protein; Flags: Precursor [Acropora millepora]	961090747	XM_014916428.1	0	PREDICTED: Octopus bimaculoides hephaestin-like protein (LOC106870385), mRNA	--	--	--	--	B3EWZ9	2.3e-282	Hephaestin-like protein OS=Acropora millepora PE=1 SV=1	PF07731//PF07732	Multicopper oxidase//Multicopper oxidase	GO:0055114	oxidation-reduction process	GO:0005507//GO:0016491	copper ion binding//oxidoreductase activity	--	--	KOG1263	Multicopper oxidases
Cluster-58773.153413	6660.89	13721.9	-1.0427	2.6292e-07	1665	443692853	ELT94358.1	2.9e-112	hypothetical protein CAPTEDRAFT_221292 [Capitella teleta]	961104290	XM_014921090.1	0	PREDICTED: Octopus bimaculoides cathepsin B-like (LOC106873643), transcript variant X1, mRNA	--	--	--	--	P07858	3.2e-106	Cathepsin B OS=Homo sapiens GN=CTSB PE=1 SV=3	PF00112//PF08127//PF03051	Papain family cysteine protease//Peptidase family C1 propeptide//Peptidase C1-like family	GO:0006508//GO:0050790	proteolysis//regulation of catalytic activity	GO:0008234//GO:0004197	cysteine-type peptidase activity//cysteine-type endopeptidase activity	--	--	KOG1543	Cysteine proteinase Cathepsin L
Cluster-58773.69126	555.748	1618.05	-1.5418	3.0648e-07	1409	762116501	XP_011441088.1	1.3e-65	PREDICTED: collagen alpha-4(VI) chain-like [Crassostrea gigas]	961118709	XM_014926223.1	0	PREDICTED: Octopus bimaculoides collagen alpha-6(VI) chain-like (LOC106877343), mRNA	--	--	--	--	A6NMZ7	2.8e-42	Collagen alpha-6(VI) chain OS=Homo sapiens GN=COL6A6 PE=1 SV=2	--	--	--	--	--	--	--	--	--	--
Cluster-58773.163702	7308.67	24721.7	-1.7581	3.4375e-07	1937	762098834	XP_011431819.1	4.7e-37	PREDICTED: uncharacterized protein LOC105331373 [Crassostrea gigas]	961089968	XM_014916155.1	0	PREDICTED: Octopus bimaculoides uncharacterized LOC106870155 (LOC106870155), mRNA	--	--	--	--	--	--	--	PF05480//PF01607	Staphylococcus haemolytic protein//Chitin binding Peritrophin-A domain	GO:0006030//GO:0009405	chitin metabolic process//pathogenesis	GO:0008061	chitin binding	GO:0005576	extracellular region	--	--
Cluster-58773.143478	7.60412	75.9067	-3.3194	3.8041e-07	810	524886695	XP_005099940.1	9.5e-40	PREDICTED: uncharacterized protein LOC101860820 [Aplysia californica]	961111510	XM_014923595.1	9.04662e-153	PREDICTED: Octopus bimaculoides phosphonoacetaldehyde hydrolase-like (LOC106875443), mRNA	--	--	--	--	A0LMC1	6.3e-23	Phosphonoacetaldehyde hydrolase OS=Syntrophobacter fumaroxidans (strain DSM 10017 / MPOB) GN=phnX PE=3 SV=1	--	--	--	--	--	--	--	--	--	--
Cluster-58773.135144	192.932	628.279	-1.7033	4.8543e-07	1540	260810891	XP_002600156.1	9.8e-70	hypothetical protein BRAFLDRAFT_66664 [Branchiostoma floridae]>gi|229285442|gb|EEN56168.1| hypothetical protein BRAFLDRAFT_66664 [Branchiostoma floridae]	961132091	XM_014930870.1	0	PREDICTED: Octopus bimaculoides plancitoxin-1-like (LOC106880775), mRNA	--	--	--	--	Q75WF2	2.2e-72	Plancitoxin-1 OS=Acanthaster planci PE=1 SV=1	PF09297//PF03265	NADH pyrophosphatase zinc ribbon domain//Deoxyribonuclease II	GO:0006308//GO:0006259	DNA catabolic process//DNA metabolic process	GO:0046872//GO:0016787//GO:0004531	metal ion binding//hydrolase activity//deoxyribonuclease II activity	--	--	--	--
Cluster-58773.181886	16.8951	110.367	-2.7076	4.9102e-07	1318	762116184	XP_011440915.1	3.1e-24	PREDICTED: acidic phospholipase A2-like [Crassostrea gigas]	961071957	XM_014925385.1	0	PREDICTED: Octopus bimaculoides basic phospholipase A2 Ts-G6D49-like (LOC106876697), transcript variant X4, mRNA	--	--	--	--	C1JAR9	2.5e-21	Phospholipase A2 Scol/Pla OS=Scolopendra viridis PE=1 SV=1	PF08398	Parvovirus coat protein VP1	--	--	GO:0005198	structural molecule activity	GO:0019028	viral capsid	KOG4087	Phospholipase A2
Cluster-58773.120245	0.0001	45.1641	-18.7848	5.5958e-07	2007	--	--	--	--	961114646	XM_014924707.1	0	PREDICTED: Octopus bimaculoides glycoprotein 3-alpha-L-fucosyltransferase A-like (LOC106876232), transcript variant X1, mRNA	--	--	--	--	--	--	--	--	--	--	--	--	--	--	--	--	--
Cluster-58773.220277	9.31249	157.249	-4.0777	5.9841e-07	6925	68159936	AAY86556.1	1.3e-230	chitin synthase [Atrina rigida]	961092325	XM_014916976.1	0	PREDICTED: Octopus bimaculoides uncharacterized LOC106870779 (LOC106870779), mRNA	--	--	--	--	Q8NEV4	7.1e-107	Myosin-IIIa OS=Homo sapiens GN=MYO3A PE=2 SV=2	PF13506//PF00437//PF00063	Glycosyl transferase family 21//Type II/IV secretion system protein//Myosin head (motor domain)	GO:0006810	transport	GO:0005524//GO:0003774//GO:0016757	ATP binding//motor activity//transferase activity, transferring glycosyl groups	GO:0016459	myosin complex	KOG4229	Myosin VII, myosin IXB and related myosins
Cluster-58773.191044	316.229	1195.08	-1.9181	5.9841e-07	608	762098834	XP_011431819.1	1.8e-11	PREDICTED: uncharacterized protein LOC105331373 [Crassostrea gigas]	961089968	XM_014916155.1	4.05596e-145	PREDICTED: Octopus bimaculoides uncharacterized LOC106870155 (LOC106870155), mRNA	--	--	--	--	--	--	--	--	--	--	--	--	--	--	--	--	--
Cluster-58773.135698	425.924	1411.89	-2.0435	6.3206e-07	979	283837550	BAI66447.1	1.4e-82	serine protease 1 [Heterololigo bleekeri]	961139148	XM_014933316.1	1.42512e-151	PREDICTED: Octopus bimaculoides chymotrypsin-1-like (LOC106882587), mRNA	K09632	CTRL	chymotrypsin-like protease	http://www.genome.jp/dbget-bin/www_bget?ko:K09632	P40313	1.7e-30	Chymotrypsin-like protease CTRL-1 OS=Homo sapiens GN=CTRL PE=2 SV=1	PF00089	Trypsin	--	--	--	--	--	--	--	--
Cluster-58773.73325	1909.38	7871.4	-1.729	6.3206e-07	1280	591384433	XP_007066670.1	1.8e-61	PREDICTED: melanotransferrin [Chelonia mydas]	961101194	XM_014920009.1	5.1453e-162	PREDICTED: Octopus bimaculoides melanotransferrin-like (LOC106872872), transcript variant X1, mRNA	--	--	--	--	O97490	1.2e-57	Melanotransferrin OS=Oryctolagus cuniculus GN=MELTF PE=2 SV=1	--	--	GO:0006508	proteolysis	GO:0004252	serine-type endopeptidase activity	--	--	--	--
Cluster-58773.91432	1278.13	3209.39	-1.3283	8.1208e-07	2659	556592513	AGZ63441.1	2e-296	catalase [Octopus vulgaris]	961124143	XM_014928104.1	0	PREDICTED: Octopus bimaculoides catalase-like (LOC106878775), mRNA	--	--	--	--	P00432	7.2e-217	Catalase OS=Bos taurus GN=CAT PE=1 SV=3	PF00199	Catalase	GO:0015947//GO:0006804//GO:0006979//GO:0006568//GO:0055114	methane metabolic process//obsolete peroxidase reaction//response to oxidative stress//tryptophan metabolic process//oxidation-reduction process	GO:0004096//GO:0020037	catalase activity//heme binding	--	--	KOG0047	Catalase
Cluster-58773.54539	738.17	2380.57	-1.6893	8.6524e-07	981	195999794	XP_002109765.1	1.4e-26	expressed hypothetical protein [Trichoplax adhaerens]>gi|190587889|gb|EDV27931.1| expressed hypothetical protein [Trichoplax adhaerens]	961083563	XM_014913903.1	0	PREDICTED: Octopus bimaculoides ecdysteroid-regulated 16 kDa protein-like (LOC106868578), mRNA	K13443	NPC2	Niemann-Pick C2 protein	http://www.genome.jp/dbget-bin/www_bget?ko:K13443	Q9VQ62	1.8e-19	Protein NPC2 homolog OS=Drosophila melanogaster GN=Npc2a PE=2 SV=1	--	--	--	--	--	--	--	--	--	--
Cluster-58773.107092	1.95043	32.8218	-4.0728	9.9573e-07	1057	--	--	--	--	961094637	XM_014917767.1	1.39166e-42	PREDICTED: Octopus bimaculoides cln5-like protein 1 (LOC106871359), mRNA	--	--	--	--	--	--	--	--	--	--	--	--	--	--	--	--	--
Cluster-58773.185590	137.24	481.884	-1.812	1.162e-06	526	871220807	XP_012935816.1	1.4e-12	PREDICTED: uncharacterized protein LOC101862713, partial [Aplysia californica]	961073214	XM_014929670.1	0	PREDICTED: Octopus bimaculoides uncharacterized LOC106879916 (LOC106879916), mRNA	--	--	--	--	--	--	--	PF03067	Chitin binding domain	--	--	--	--	GO:0019028	viral capsid	--	--
Cluster-58773.101138	217.605	692.042	-1.6691	1.2683e-06	1362	762170850	XP_011423863.1	8e-108	PREDICTED: probable peptidylglycine alpha-hydroxylating monooxygenase Y71G12B.4 [Crassostrea gigas]>gi|762170852|ref|XP_011423864.1| PREDICTED: probable peptidylglycine alpha-hydroxylating monooxygenase Y71G12B.4 [Crassostrea gigas]>gi|762170854|ref|XP_011423865.1| PREDICTED: probable peptidylglycine alpha-hydroxylating monooxygenase Y71G12B.4 [Crassostrea gigas]	961092486	XM_014917027.1	0	PREDICTED: Octopus bimaculoides probable peptidylglycine alpha-hydroxylating monooxygenase 1 (LOC106870812), transcript variant X2, mRNA	--	--	--	--	Q95XM2	2.6e-77	Probable peptidylglycine alpha-hydroxylating monooxygenase 1 OS=Caenorhabditis elegans GN=pghm-1 PE=1 SV=1	PF11722//PF01082	CCCH zinc finger in TRM13 protein//Copper type II ascorbate-dependent monooxygenase, N-terminal domain	GO:0055114	oxidation-reduction process	GO:0008168//GO:0004497//GO:0005507//GO:0016715	methyltransferase activity//monooxygenase activity//copper ion binding//oxidoreductase activity, acting on paired donors, with incorporation or reduction of molecular oxygen, reduced ascorbate as one donor, and incorporation of one atom of oxygen	--	--	KOG3567	Peptidylglycine alpha-amidating monooxygenase
Cluster-58773.194232	14.2568	91.7419	-2.6859	1.567e-06	437	--	--	--	--	961089971	XM_014916156.1	3.9929e-89	PREDICTED: Octopus bimaculoides uncharacterized LOC106870156 (LOC106870156), mRNA	--	--	--	--	--	--	--	--	--	--	--	--	--	--	--	--	--
Cluster-58773.76317	44.4851	214.441	-2.2692	1.7353e-06	2905	762151488	XP_011413729.1	3.7e-102	PREDICTED: mucin-4-like [Crassostrea gigas]	961118913	XM_014926294.1	0	PREDICTED: Octopus bimaculoides mucin-like protein (LOC106877401), mRNA	--	--	--	--	B3EWY9	1.2e-63	Mucin-like protein (Fragment) OS=Acropora millepora PE=1 SV=1	PF02975//PF00008//PF06119//PF00757	Methylamine dehydrogenase, L chain//EGF-like domain//Nidogen-like//Furin-like cysteine rich region	GO:0009308//GO:0055114//GO:0007160//GO:0006468//GO:0007169	amine metabolic process//oxidation-reduction process//cell-matrix adhesion//protein phosphorylation//transmembrane receptor protein tyrosine kinase signaling pathway	GO:0016638//GO:0005515//GO:0004714//GO:0005524	oxidoreductase activity, acting on the CH-NH2 group of donors//protein binding//transmembrane receptor protein tyrosine kinase activity//ATP binding	GO:0016020//GO:0042597	membrane//periplasmic space	KOG4291	Mucin/alpha-tectorin
Cluster-58773.182401	410.272	1160.81	-1.5005	1.7353e-06	1355	260803876	XP_002596815.1	4.6e-47	hypothetical protein BRAFLDRAFT_130590 [Branchiostoma floridae]>gi|229282075|gb|EEN52827.1| hypothetical protein BRAFLDRAFT_130590 [Branchiostoma floridae]	961101403	XM_014920084.1	0	PREDICTED: Octopus bimaculoides papilin-like (LOC106872908), mRNA	--	--	--	--	Q868Z9	1.4e-43	Papilin OS=Drosophila melanogaster GN=Ppn PE=1 SV=2	PF00014	Kunitz/Bovine pancreatic trypsin inhibitor domain	--	--	GO:0004867	serine-type endopeptidase inhibitor activity	--	--	KOG4597	Serine proteinase inhibitor (KU family) with thrombospondin repeats
Cluster-58773.88531	1644.29	4970.15	-1.5958	1.7582e-06	481	--	--	--	--	--	--	--	--	--	--	--	--	--	--	--	--	--	--	--	--	--	--	--	--	--
Cluster-58773.138043	749.308	3050.16	-2.0253	1.8394e-06	378	--	--	--	--	961092097	XM_014916897.1	4.7008e-43	PREDICTED: Octopus bimaculoides uncharacterized LOC106870726 (LOC106870726), mRNA	--	--	--	--	--	--	--	--	--	--	--	--	--	--	--	--	--
Cluster-58773.155053	287.895	858.021	-1.5755	1.9661e-06	966	147900644	NP_001088499.1	2.1e-54	carboxypeptidase A1 (pancreatic) precursor [Xenopus laevis]>gi|54311498|gb|AAH84831.1| LOC495367 protein [Xenopus laevis]	961102166	XM_014920349.1	2.91596e-178	PREDICTED: Octopus bimaculoides carboxypeptidase A2-like (LOC106873122), partial mRNA	--	--	--	--	P19222	1e-48	Carboxypeptidase A2 OS=Rattus norvegicus GN=Cpa2 PE=1 SV=1	PF00246//PF02244	Zinc carboxypeptidase//Carboxypeptidase activation peptide	GO:0006508	proteolysis	GO:0004181//GO:0008270//GO:0004180	metallocarboxypeptidase activity//zinc ion binding//carboxypeptidase activity	--	--	KOG2650	Zinc carboxypeptidase
Cluster-58773.145422	23.7263	135.901	-2.518	1.9713e-06	317	--	--	--	--	961114995	XM_014924882.1	8.37631e-40	PREDICTED: Octopus bimaculoides stabilin-2-like (LOC106876371), mRNA	--	--	--	--	--	--	--	--	--	--	--	--	--	--	--	--	--
Cluster-58773.159159	202.524	648.922	-1.68	1.9745e-06	925	--	--	--	--	961085712	XR_001409372.1	0	PREDICTED: Octopus bimaculoides uncharacterized LOC106869113 (LOC106869113), ncRNA	--	--	--	--	--	--	--	PF02827//PF00612	cAMP-dependent protein kinase inhibitor//IQ calmodulin-binding motif	GO:0045859//GO:0006469	regulation of protein kinase activity//negative regulation of protein kinase activity	GO:0005515//GO:0004862	protein binding//cAMP-dependent protein kinase inhibitor activity	GO:0005952	cAMP-dependent protein kinase complex	--	--
Cluster-58773.210986	2322.42	5101.23	-1.1352	2.0971e-06	2377	765826422	NP_001292263.1	8.7e-126	acid ceramidase-like precursor [Crassostrea gigas]>gi|392529008|gb|AFM78305.1| acid ceramidase [Crassostrea gigas]	961114888	XM_014924830.1	0	PREDICTED: Octopus bimaculoides acid ceramidase-like (LOC106876330), mRNA	--	--	--	--	Q9WV54	5.1e-113	Acid ceramidase OS=Mus musculus GN=Asah1 PE=1 SV=1	PF03091//PF06736	CutA1 divalent ion tolerance protein//Protein of unknown function (DUF1211)	GO:0006813//GO:0010038	potassium ion transport//response to metal ion	GO:0005267	potassium channel activity	--	--	--	--
Cluster-58773.148382	91.8258	351.567	-4.6309	2.3281e-06	416	746842338	XP_011051377.1	2.8e-19	PREDICTED: 4-aminobutyrate aminotransferase, mitochondrial isoform X1 [Acromyrmex echinatior]	961138470	XM_014933078.1	4.79383e-103	PREDICTED: Octopus bimaculoides 4-aminobutyrate aminotransferase, mitochondrial-like (LOC106882406), mRNA	--	--	--	--	P61922	3.6e-14	4-aminobutyrate aminotransferase, mitochondrial OS=Mus musculus GN=Abat PE=1 SV=1	PF00202	Aminotransferase class-III	--	--	--	--	--	--	KOG1405	4-aminobutyrate aminotransferase
Cluster-58773.179892	3.5451	87.8356	-1.9368	2.3281e-06	349	--	--	--	--	961075615	XM_014935158.1	4.93859e-127	PREDICTED: Octopus bimaculoides uncharacterized LOC106883995 (LOC106883995), mRNA	--	--	--	--	--	--	--	--	--	--	--	GO:0030170//GO:0008483	pyridoxal phosphate binding//transaminase activity	--	--	--	--
Cluster-58773.130942	275.386	803.715	-1.5452	2.559e-06	5222	762118923	XP_011442359.1	7.4e-170	PREDICTED: sphingosine-1-phosphate lyase 1-like [Crassostrea gigas]	961125157	XM_014928455.1	0	PREDICTED: Octopus bimaculoides sphingosine-1-phosphate lyase 1-like (LOC106879041), mRNA	--	--	--	--	O95470	5.5e-152	Sphingosine-1-phosphate lyase 1 OS=Homo sapiens GN=SGPL1 PE=1 SV=3	PF05398//PF00282	PufQ cytochrome subunit//Pyridoxal-dependent decarboxylase conserved domain	GO:0015979//GO:0030494//GO:0019752	photosynthesis//bacteriochlorophyll biosynthetic process//carboxylic acid metabolic process	GO:0030170//GO:0016831	pyridoxal phosphate binding//carboxy-lyase activity	--	--	--	--
Cluster-58773.208137	0.0001	16.0182	-17.2894	2.6847e-06	491	--	--	--	--	961086594	XM_014914977.1	0	PREDICTED: Octopus bimaculoides uncharacterized LOC106869300 (LOC106869300), transcript variant X2, mRNA	--	--	--	--	--	--	--	--	--	--	--	--	--	--	--	--	--
Cluster-58773.190114	5.15292	278.585	-5.7566	3.5561e-06	1108	762110080	XP_011437716.1	3.2e-91	PREDICTED: 4-aminobutyrate aminotransferase, mitochondrial-like [Crassostrea gigas]	961138470	XM_014933078.1	0	PREDICTED: Octopus bimaculoides 4-aminobutyrate aminotransferase, mitochondrial-like (LOC106882406), mRNA	--	--	--	--	P80147	3.5e-80	4-aminobutyrate aminotransferase, mitochondrial OS=Sus scrofa GN=ABAT PE=1 SV=2	PF00202	Aminotransferase class-III	--	--	GO:0008483//GO:0030170	transaminase activity//pyridoxal phosphate binding	--	--	KOG1405	4-aminobutyrate aminotransferase
Cluster-58773.115576	0.0001	27.678	-18.0784	3.9105e-06	2289	193643513	XP_001943927.1	3.4e-167	PREDICTED: serine/threonine-protein kinase PAK mbt [Acyrthosiphon pisum]	961118067	XM_014926002.1	0	PREDICTED: Octopus bimaculoides serine/threonine-protein kinase PAK 7-like (LOC106877174), transcript variant X1, mRNA	--	--	--	--	Q8BTW9	1.1e-144	Serine/threonine-protein kinase PAK 4 OS=Mus musculus GN=Pak4 PE=1 SV=1	PF07714//PF00069//PF05353	Protein tyrosine kinase//Protein kinase domain//Delta Atracotoxin	GO:0006810//GO:0006468//GO:0009405	transport//protein phosphorylation//pathogenesis	GO:0019871//GO:0005524//GO:0004672	sodium channel inhibitor activity//ATP binding//protein kinase activity	GO:0005576	extracellular region	KOG0578	p21-activated serine/threonine protein kinase
Cluster-58773.123091	187.568	566.868	-1.5956	5.3615e-06	2673	762168149	XP_011422433.1	2.6e-25	PREDICTED: amphoterin-induced protein 3-like [Crassostrea gigas]>gi|762168151|ref|XP_011422434.1| PREDICTED: amphoterin-induced protein 3-like [Crassostrea gigas]>gi|762168153|ref|XP_011422435.1| PREDICTED: amphoterin-induced protein 3-like [Crassostrea gigas]	961122969	XM_014927696.1	0	PREDICTED: Octopus bimaculoides leucine-rich repeat neuronal protein 3-like (LOC106878478), mRNA	--	--	--	--	O93233	1.8e-10	Phospholipase A2 inhibitor OS=Gloydius brevicaudus siniticus PE=1 SV=1	PF06596//PF13855	Photosystem II reaction centre X protein (PsbX)//Leucine rich repeat	GO:0015979	photosynthesis	GO:0005515	protein binding	GO:0009523//GO:0016020	photosystem II//membrane	KOG0619	FOG: Leucine rich repeat
Cluster-58773.118897	166.075	602.038	-1.858	5.4658e-06	645	762092088	XP_011428468.1	1.9e-35	PREDICTED: transforming growth factor-beta-induced protein ig-h3-like [Crassostrea gigas]>gi|405960571|gb|EKC26485.1| Transforming growth factor-beta-induced protein ig-h3 [Crassostrea gigas]	961114995	XM_014924882.1	0	PREDICTED: Octopus bimaculoides stabilin-2-like (LOC106876371), mRNA	--	--	--	--	Q15582	1.8e-17	Transforming growth factor-beta-induced protein ig-h3 OS=Homo sapiens GN=TGFBI PE=1 SV=1	PF02805	Metal binding domain of Ada	GO:0006355//GO:0006281	regulation of transcription, DNA-templated//DNA repair	GO:0008270//GO:0008168//GO:0003677	zinc ion binding//methyltransferase activity//DNA binding	--	--	KOG1437	Fasciclin and related adhesion glycoproteins
Cluster-58773.18922	6.6509	56.3648	-3.0832	6.9878e-06	619	--	--	--	--	--	--	--	--	--	--	--	--	--	--	--	--	--	--	--	--	--	--	--	--	--
Cluster-58773.141198	67.5538	265.911	-1.9768	6.9878e-06	735	676484289	XP_009063298.1	6.7e-69	hypothetical protein LOTGIDRAFT_235630 [Lottia gigantea]>gi|556097399|gb|ESO86051.1| hypothetical protein LOTGIDRAFT_235630 [Lottia gigantea]	961081515	XM_014913208.1	0	PREDICTED: Octopus bimaculoides uncharacterized LOC106868092 (LOC106868092), mRNA	--	--	--	--	--	--	--	--	--	--	--	--	--	--	--	--	--
Cluster-58773.158102	0.581028	21.497	-5.2094	8.041e-06	5090	156365753	XP_001626808.1	7.3e-122	predicted protein [Nematostella vectensis]>gi|156213697|gb|EDO34708.1| predicted protein [Nematostella vectensis]	961086452	XM_014914922.1	0	PREDICTED: Octopus bimaculoides GDP-Man:Man(3)GlcNAc(2)-PP-Dol alpha-1,2-mannosyltransferase-like (LOC106869257), transcript variant X2, mRNA	--	--	--	--	Q2TAA5	9.8e-122	GDP-Man:Man(3)GlcNAc(2)-PP-Dol alpha-1,2-mannosyltransferase OS=Homo sapiens GN=ALG11 PE=1 SV=2	PF01424	R3H domain	--	--	GO:0003676	nucleic acid binding	--	--	KOG1387	Glycosyltransferase
Cluster-58773.85842	0.0001	14.8156	-17.1768	9.1647e-06	871	762147517	XP_011457073.1	2.2e-127	PREDICTED: lysine-specific demethylase 7B-like isoform X1 [Crassostrea gigas]	961141202	XM_014934031.1	0	PREDICTED: Octopus bimaculoides lysine-specific demethylase 7B-like (LOC106883140), partial mRNA	--	--	--	--	P0CH95	1.5e-94	Histone lysine demethylase PHF8 OS=Danio rerio GN=phf8 PE=1 SV=1	--	--	--	--	--	--	--	--	KOG1633	F-box protein JEMMA and related proteins with JmjC, PHD, F-box and LRR domains
Cluster-58773.142478	0.0001	42.6538	-18.7023	1.0962e-05	3161	--	--	--	--	--	--	--	--	--	--	--	--	--	--	--	--	--	--	--	--	--	--	--	--	--
Cluster-58773.143482	201.069	833.416	-2.0513	1.1229e-05	2385	762132200	XP_011449282.1	7.7e-98	PREDICTED: uncharacterized protein LOC105343571 [Crassostrea gigas]	961111510	XM_014923595.1	0	PREDICTED: Octopus bimaculoides phosphonoacetaldehyde hydrolase-like (LOC106875443), mRNA	--	--	--	--	A0LMC1	3.3e-51	Phosphonoacetaldehyde hydrolase OS=Syntrophobacter fumaroxidans (strain DSM 10017 / MPOB) GN=phnX PE=3 SV=1	--	--	--	--	--	--	--	--	--	--
Cluster-58773.39695	5.75563	68.179	-3.5663	1.1296e-05	1305	699245937	XP_009859587.1	2.5e-13	PREDICTED: uncharacterized protein LOC100178034 isoform X1 [Ciona intestinalis]	--	--	--	--	--	--	--	--	--	--	--	--	--	--	--	--	--	--	--	--	--
Cluster-58773.201881	7.61005	73.9155	-3.2799	1.2501e-05	507	--	--	--	--	961089971	XM_014916156.1	2.63916e-131	PREDICTED: Octopus bimaculoides uncharacterized LOC106870156 (LOC106870156), mRNA	--	--	--	--	--	--	--	--	--	--	--	--	--	--	--	--	--
Cluster-58773.167082	48.3059	204.067	-2.0788	1.3214e-05	352	733387118	AIZ97492.1	3e-43	putative chitotriosidase [Euprymna scolopes]	961075566	XM_014935140.1	1.32854e-157	PREDICTED: Octopus bimaculoides acidic mammalian chitinase-like (LOC106883980), mRNA	--	--	--	--	Q9BZP6	5.3e-27	Acidic mammalian chitinase OS=Homo sapiens GN=CHIA PE=1 SV=1	PF00704	Glycosyl hydrolases family 18	GO:0005975	carbohydrate metabolic process	GO:0004553	hydrolase activity, hydrolyzing O-glycosyl compounds	--	--	KOG2806	Chitinase
Cluster-58773.144895	127.55	415.889	-1.7051	1.3416e-05	535	762166261	XP_011421442.1	1.1e-23	PREDICTED: uncharacterized protein LOC105324085 [Crassostrea gigas]>gi|405969616|gb|EKC34577.1| hypothetical protein CGI_10010463 [Crassostrea gigas]	961073211	XM_014929659.1	0	PREDICTED: Octopus bimaculoides uncharacterized LOC106879907 (LOC106879907), mRNA	--	--	--	--	--	--	--	PF01924//PF03067	Hydrogenase formation hypA family//Chitin binding domain	--	--	GO:0046872	metal ion binding	GO:0019028	viral capsid	--	--
Cluster-58773.229520	986.46	4616.99	-2.2266	1.3477e-05	929	405962288	EKC27980.1	7.3e-28	Transforming growth factor-beta-induced protein ig-h3 [Crassostrea gigas]	961114995	XM_014924882.1	0	PREDICTED: Octopus bimaculoides stabilin-2-like (LOC106876371), mRNA	--	--	--	--	Q8R4U0	1e-13	Stabilin-2 OS=Mus musculus GN=Stab2 PE=1 SV=1	--	--	--	--	--	--	--	--	--	--
Cluster-58773.168529	104.223	658.81	-2.6602	1.3592e-05	2361	676421672	XP_009043831.1	8.9e-14	hypothetical protein LOTGIDRAFT_152116 [Lottia gigantea]>gi|556116634|gb|ESP05286.1| hypothetical protein LOTGIDRAFT_152116 [Lottia gigantea]	961098811	XM_014919169.1	7.42567e-163	PREDICTED: Octopus bimaculoides pre-mRNA-splicing factor cwc2-like (LOC106872249), mRNA	--	--	--	--	--	--	--	--	--	--	--	--	--	--	--	--	--
Cluster-58773.193072	215.164	1434.24	-2.7368	1.3993e-05	5483	871240706	XP_012939441.1	6.4e-132	PREDICTED: heparan-alpha-glucosaminide N-acetyltransferase-like [Aplysia californica]	961141043	XM_014933978.1	0	PREDICTED: Octopus bimaculoides heparan-alpha-glucosaminide N-acetyltransferase-like (LOC106883086), mRNA	--	--	--	--	Q3UDW8	5.1e-108	Heparan-alpha-glucosaminide N-acetyltransferase OS=Mus musculus GN=Hgsnat PE=1 SV=2	--	--	--	--	--	--	--	--	KOG4683	Uncharacterized conserved protein
Cluster-58773.141409	823.859	1945.79	-1.2399	1.4581e-05	370	676460331	XP_009055588.1	5.1e-17	hypothetical protein LOTGIDRAFT_228660 [Lottia gigantea]>gi|556105325|gb|ESO93977.1| hypothetical protein LOTGIDRAFT_228660 [Lottia gigantea]	961093131	XM_014917243.1	5.26678e-127	PREDICTED: Octopus bimaculoides kielin/chordin-like protein (LOC106870995), transcript variant X2, mRNA	--	--	--	--	Q9IBG7	6.5e-07	Kielin/chordin-like protein OS=Xenopus laevis GN=kcp PE=2 SV=1	PF05375//PF00093	Pacifastin inhibitor (LCMII)//von Willebrand factor type C domain	--	--	GO:0005515//GO:0030414	protein binding//peptidase inhibitor activity	--	--	--	--
Cluster-58773.201746	1063.47	3576.66	-1.7498	1.6118e-05	1758	676464567	XP_009056962.1	1.6e-116	hypothetical protein LOTGIDRAFT_216931 [Lottia gigantea]>gi|556103755|gb|ESO92407.1| hypothetical protein LOTGIDRAFT_216931 [Lottia gigantea]	961099496	XM_014919409.1	0	PREDICTED: Octopus bimaculoides pancreatic triacylglycerol lipase-like (LOC106872413), mRNA	--	--	--	--	P17892	1.9e-80	Pancreatic lipase-related protein 2 OS=Mus musculus GN=Pnliprp2 PE=1 SV=2	PF01477//PF01674	PLAT/LH2 domain//Lipase (class 2)	--	--	GO:0016787//GO:0005515	hydrolase activity//protein binding	--	--	--	--
Cluster-58773.83744	102.158	332.942	-1.7045	1.8234e-05	1375	--	--	--	--	--	--	--	--	--	--	--	--	--	--	--	--	--	--	--	--	--	--	--	--	--
Cluster-58773.127223	137.618	426.891	-1.6332	2.0171e-05	770	676460157	XP_009055532.1	3e-59	hypothetical protein LOTGIDRAFT_209446 [Lottia gigantea]>gi|556105261|gb|ESO93913.1| hypothetical protein LOTGIDRAFT_209446 [Lottia gigantea]	961128807	XM_014929716.1	0	PREDICTED: Octopus bimaculoides zinc metalloproteinase nas-15-like (LOC106879956), mRNA	--	--	--	--	P55115	2.8e-44	Zinc metalloproteinase nas-15 OS=Caenorhabditis elegans GN=nas-15 PE=2 SV=2	PF01400//PF00413	Astacin (Peptidase family M12A)//Matrixin	GO:0006508	proteolysis	GO:0004222//GO:0008270	metalloendopeptidase activity//zinc ion binding	GO:0031012	extracellular matrix	KOG3714	Meprin A metalloprotease
Cluster-58773.214007	0.0001	46.1123	-18.8148	2.0664e-05	4305	762150908	XP_011413425.1	1.1e-97	PREDICTED: zinc finger protein 704-like [Crassostrea gigas]>gi|405963951|gb|EKC29482.1| hypothetical protein CGI_10025491 [Crassostrea gigas]	961138237	XM_014933000.1	0	PREDICTED: Octopus bimaculoides zinc finger protein 395-like (LOC106882352), mRNA	--	--	--	--	Q9ERQ3	1.8e-44	Zinc finger protein 704 OS=Mus musculus GN=Znf704 PE=1 SV=1	PF04960	Glutaminase	GO:0006541	glutamine metabolic process	GO:0004359	glutaminase activity	--	--	--	--
Cluster-58773.229259	97.9066	428.674	-2.1304	2.3638e-05	2633	524901768	XP_005107288.1	1.9e-52	PREDICTED: proton-coupled folate transporter-like [Aplysia californica]>gi|524901770|ref|XP_005107289.1| PREDICTED: proton-coupled folate transporter-like [Aplysia californica]>gi|524901772|ref|XP_005107290.1| PREDICTED: proton-coupled folate transporter-like [Aplysia californica]>gi|871259552|ref|XP_012942886.1| PREDICTED: proton-coupled folate transporter-like [Aplysia californica]	961135438	XM_014932043.1	0	PREDICTED: Octopus bimaculoides proton-coupled folate transporter-like (LOC106881588), mRNA	--	--	--	--	Q5F4B8	3.6e-43	Solute carrier family 46 member 3 OS=Gallus gallus GN=SLC46A3 PE=2 SV=1	PF07690//PF08545	Major Facilitator Superfamily//3-Oxoacyl-[acyl-carrier-protein (ACP)] synthase III	GO:0055085//GO:0006633//GO:0042967	transmembrane transport//fatty acid biosynthetic process//acyl-carrier-protein biosynthetic process	GO:0004315	3-oxoacyl-[acyl-carrier-protein] synthase activity	GO:0016021//GO:0005835	integral component of membrane//fatty acid synthase complex	--	--
Cluster-58773.148342	33.3071	146.166	-2.1337	2.3966e-05	1530	443734186	ELU18258.1	9e-92	hypothetical protein CAPTEDRAFT_90574 [Capitella teleta]	961069819	XM_014917963.1	0	PREDICTED: Octopus bimaculoides mitochondrial coenzyme A transporter SLC25A42-like (LOC106871468), transcript variant X3, mRNA	K15085	SLC25A42	solute carrier family 25, member 42	http://www.genome.jp/dbget-bin/www_bget?ko:K15085	Q8R0Y8	1.5e-89	Mitochondrial coenzyme A transporter SLC25A42 OS=Mus musculus GN=Slc25a42 PE=1 SV=1	--	--	--	--	--	--	--	--	KOG0752	Mitochondrial solute carrier protein
Cluster-58773.144075	213.428	658.056	-1.6245	2.4342e-05	529	--	--	--	--	--	--	--	--	--	--	--	--	--	--	--	--	--	--	--	--	--	--	--	--	--
Cluster-58773.180254	38.2703	165.91	-2.1161	2.5124e-05	715	--	--	--	--	961129017	XM_014929792.1	0	PREDICTED: Octopus bimaculoides uncharacterized LOC106880006 (LOC106880006), transcript variant X1, mRNA	--	--	--	--	--	--	--	--	--	--	--	--	--	--	--	--	--
Cluster-58773.179288	2024.95	6613.93	-1.7076	3.0851e-05	1615	676460842	XP_009055753.1	1.7e-101	hypothetical protein LOTGIDRAFT_215949 [Lottia gigantea]>gi|556104901|gb|ESO93553.1| hypothetical protein LOTGIDRAFT_215949 [Lottia gigantea]	961123112	XM_014927747.1	0	PREDICTED: Octopus bimaculoides pancreatic triacylglycerol lipase-like (LOC106878519), mRNA	--	--	--	--	Q64425	1.3e-67	Pancreatic triacylglycerol lipase (Fragment) OS=Myocastor coypus GN=PNLIP PE=2 SV=1	PF09472//PF01674//PF01477	Tetrahydromethanopterin S-methyltransferase, F subunit (MtrF)//Lipase (class 2)//PLAT/LH2 domain	GO:0015948//GO:0046656	methanogenesis//folic acid biosynthetic process	GO:0030269//GO:0016787//GO:0005515	tetrahydromethanopterin S-methyltransferase activity//hydrolase activity//protein binding	GO:0016020	membrane	--	--
Cluster-58773.99633	108.046	578.684	-2.4211	3.4507e-05	934	--	--	--	--	961104898	XM_014921309.1	1.84485e-115	PREDICTED: Octopus bimaculoides 70 kDa neurofilament protein-like (LOC106873794), mRNA	--	--	--	--	--	--	--	PF00038//PF06156//PF13851//PF11802	Intermediate filament protein//Protein of unknown function (DUF972)//Growth-arrest specific micro-tubule binding//Centromere-associated protein K	GO:0006260//GO:0048870	DNA replication//cell motility	GO:0005198	structural molecule activity	GO:0005634//GO:0005882//GO:0031514	nucleus//intermediate filament//motile cilium	--	--
Cluster-58773.43884	1480.1	3577.31	-1.2732	3.5082e-05	3485	676426752	XP_009044724.1	2.7e-253	hypothetical protein LOTGIDRAFT_170648 [Lottia gigantea]>gi|556115903|gb|ESP04555.1| hypothetical protein LOTGIDRAFT_170648 [Lottia gigantea]	961067798	XM_014934757.1	0	PREDICTED: Octopus bimaculoides hephaestin-like protein (LOC106883630), partial mRNA	--	--	--	--	B3EWZ9	2.4e-244	Hephaestin-like protein OS=Acropora millepora PE=1 SV=1	PF07732//PF06467//PF09514//PF07731	Multicopper oxidase//MYM-type Zinc finger with FCS sequence motif//SSXRD motif//Multicopper oxidase	GO:0055114//GO:0006355	oxidation-reduction process//regulation of transcription, DNA-templated	GO:0005507//GO:0016491//GO:0008270	copper ion binding//oxidoreductase activity//zinc ion binding	GO:0005634	nucleus	KOG1263	Multicopper oxidases
Cluster-58773.39805	23.8579	117.021	-2.2942	4.001e-05	399	378524204	F7J220.1	2.1e-08	RecName: Full=Scavenger receptor cysteine-rich domain superfamily protein; Short=ApSRCR1; Flags: Precursor [Patiria pectinifera]>gi|335057486|dbj|BAK39578.1| scavenger receptor cysteine-rich domain superfamily protein [Patiria pectinifera]	961075121	XM_014934994.1	1.68298e-87	PREDICTED: Octopus bimaculoides deleted in malignant brain tumors 1 protein-like (LOC106883855), mRNA	--	--	--	--	F7J220	8.8e-10	Scavenger receptor cysteine-rich domain superfamily protein OS=Patiria pectinifera GN=SRCR1 PE=1 SV=1	PF00530	Scavenger receptor cysteine-rich domain	GO:0007165	signal transduction	GO:0005044	scavenger receptor activity	GO:0016020	membrane	--	--
Cluster-58773.163696	1269.32	4344.81	-1.7752	4.2798e-05	397	355782603	EHH64524.1	1.1e-06	hypothetical protein EGM_17765, partial [Macaca fascicularis]	--	--	--	--	--	--	--	--	--	--	--	--	--	--	--	--	--	--	--	--	--
Cluster-58773.136963	826.959	1873.42	-1.1798	4.2798e-05	2534	676439520	XP_009048879.1	3.6e-279	hypothetical protein LOTGIDRAFT_225803 [Lottia gigantea]>gi|556111779|gb|ESP00431.1| hypothetical protein LOTGIDRAFT_225803 [Lottia gigantea]	961098493	XM_014919065.1	0	PREDICTED: Octopus bimaculoides delta-1-pyrroline-5-carboxylate synthase-like (LOC106872175), transcript variant X1, mRNA	--	--	--	--	Q5R4M8	3.3e-251	Delta-1-pyrroline-5-carboxylate synthase OS=Pongo abelii GN=ALDH18A1 PE=2 SV=1	PF09416//PF06221//PF00171	RNA helicase (UPF2 interacting domain)//Putative zinc finger motif, C2HC5-type//Aldehyde dehydrogenase family	GO:0055114//GO:0000184//GO:0006355//GO:0008152	oxidation-reduction process//nuclear-transcribed mRNA catabolic process, nonsense-mediated decay//regulation of transcription, DNA-templated//metabolic process	GO:0008270//GO:0005524//GO:0004386//GO:0003677//GO:0016491	zinc ion binding//ATP binding//helicase activity//DNA binding//oxidoreductase activity	GO:0005634//GO:0005737	nucleus//cytoplasm	KOG4165	Gamma-glutamyl phosphate reductase
Cluster-58773.113811	6.16962	49.3265	-2.9991	4.4242e-05	676	270016927	EFA13373.1	1.7e-21	hypothetical protein TcasGA2_TC001390 [Tribolium castaneum]	961101944	XM_014920270.1	5.49126e-10	PREDICTED: Octopus bimaculoides uncharacterized LOC106873055 (LOC106873055), transcript variant X2, mRNA	--	--	--	--	--	--	--	--	--	--	--	--	--	--	--	--	--
Cluster-58773.157438	352.438	1116.33	-1.6633	4.7257e-05	1294	--	--	--	--	--	--	--	--	--	--	--	--	--	--	--	--	--	--	--	--	--	--	--	--	--
Cluster-58773.132243	251.237	860.923	-1.7768	4.728e-05	1785	159006	AAA16244.1	1.2e-183	peroxidase-like protein, partial [Euprymna scolopes]	961130811	XM_014930415.1	0	PREDICTED: Octopus bimaculoides peroxidase-like protein (LOC106880475), partial mRNA	--	--	--	--	A1KZ92	6.2e-55	Peroxidasin-like protein OS=Homo sapiens GN=PXDNL PE=1 SV=3	--	--	--	--	--	--	--	--	KOG2408	Peroxidase/oxygenase
Cluster-58773.147322	308.834	858.671	-1.4753	5.2904e-05	1814	676461383	XP_009055926.1	1.2e-180	hypothetical protein LOTGIDRAFT_161773 [Lottia gigantea]>gi|556104570|gb|ESO93222.1| hypothetical protein LOTGIDRAFT_161773 [Lottia gigantea]	961130162	XM_014930186.1	0	PREDICTED: Octopus bimaculoides protein henna-like (LOC106880309), partial mRNA	--	--	--	--	P16331	1.4e-158	Phenylalanine-4-hydroxylase OS=Mus musculus GN=Pah PE=1 SV=4	PF02046//PF01842//PF00351	Cytochrome c oxidase subunit VIa//ACT domain//Biopterin-dependent aromatic amino acid hydroxylase	GO:0055114//GO:0008152//GO:0006123//GO:0015992	oxidation-reduction process//metabolic process//mitochondrial electron transport, cytochrome c to oxygen//proton transport	GO:0016714//GO:0004129//GO:0016597	oxidoreductase activity, acting on paired donors, with incorporation or reduction of molecular oxygen, reduced pteridine as one donor, and incorporation of one atom of oxygen//cytochrome-c oxidase activity//amino acid binding	GO:0045277//GO:0005743//GO:0005751	respiratory chain complex IV//mitochondrial inner membrane//mitochondrial respiratory chain complex IV	--	--
Cluster-58773.39611	993.5	3870.66	-1.962	5.8699e-05	2230	762154281	XP_011415204.1	8.6e-83	PREDICTED: A disintegrin and metalloproteinase with thrombospondin motifs 5-like isoform X1 [Crassostrea gigas]	961067758	XM_014933311.1	0	PREDICTED: Octopus bimaculoides A disintegrin and metalloproteinase with thrombospondin motifs 12-like (LOC106882557), mRNA	--	--	--	--	P58397	4e-35	A disintegrin and metalloproteinase with thrombospondin motifs 12 OS=Homo sapiens GN=ADAMTS12 PE=1 SV=2	PF01562//PF03419//PF05297//PF01421//PF00413//PF02031	Reprolysin family propeptide//Sporulation factor SpoIIGA//Herpesvirus latent membrane protein 1 (LMP1)//Reprolysin (M12B) family zinc metalloprotease//Matrixin//Streptomyces extracellular neutral proteinase (M7) family	GO:0030436//GO:0019087//GO:0006508	asexual sporulation//transformation of host cell by virus//proteolysis	GO:0004222//GO:0008270//GO:0004190	metalloendopeptidase activity//zinc ion binding//aspartic-type endopeptidase activity	GO:0005576//GO:0016021//GO:0031012	extracellular region//integral component of membrane//extracellular matrix	KOG3538	Disintegrin metalloproteinases with thrombospondin repeats
Cluster-58773.147325	631.759	1462.35	-1.2108	5.8699e-05	1903	762130732	XP_011448508.1	9.9e-181	PREDICTED: protein henna-like isoform X3 [Crassostrea gigas]>gi|405962622|gb|EKC28280.1| Protein henna [Crassostrea gigas]	961130162	XM_014930186.1	0	PREDICTED: Octopus bimaculoides protein henna-like (LOC106880309), partial mRNA	--	--	--	--	P16331	6.4e-159	Phenylalanine-4-hydroxylase OS=Mus musculus GN=Pah PE=1 SV=4	PF02046//PF01842//PF00351	Cytochrome c oxidase subunit VIa//ACT domain//Biopterin-dependent aromatic amino acid hydroxylase	GO:0015992//GO:0006123//GO:0008152//GO:0055114	proton transport//mitochondrial electron transport, cytochrome c to oxygen//metabolic process//oxidation-reduction process	GO:0004129//GO:0016597//GO:0016714	cytochrome-c oxidase activity//amino acid binding//oxidoreductase activity, acting on paired donors, with incorporation or reduction of molecular oxygen, reduced pteridine as one donor, and incorporation of one atom of oxygen	GO:0005751//GO:0005743//GO:0045277	mitochondrial respiratory chain complex IV//mitochondrial inner membrane//respiratory chain complex IV	--	--
Cluster-132596.0	40.854	169.166	-2.0499	6.3742e-05	775	13444983	CAC34834.1	1.1e-21	lysozyme [Chlamys islandica]	961096554	XM_014918442.1	0	PREDICTED: Octopus bimaculoides lysozyme-like (LOC106871800), mRNA	--	--	--	--	P83673	2.4e-24	Lysozyme 1 OS=Crassostrea virginica GN=lysoz1 PE=1 SV=3	PF05497	Destabilase	GO:0005975	carbohydrate metabolic process	GO:0003796	lysozyme activity	--	--	--	--
Cluster-58773.183196	41.0389	191.681	-2.2236	6.5862e-05	2807	676492942	XP_009066085.1	1.4e-90	hypothetical protein LOTGIDRAFT_197485 [Lottia gigantea]>gi|556094482|gb|ESO83135.1| hypothetical protein LOTGIDRAFT_197485 [Lottia gigantea]	961070226	XM_014919290.1	0	PREDICTED: Octopus bimaculoides solute carrier organic anion transporter family member 2A1-like (LOC106872338), mRNA	--	--	--	--	Q92959	2.9e-59	Solute carrier organic anion transporter family member 2A1 OS=Homo sapiens GN=SLCO2A1 PE=1 SV=2	PF04843//PF07690//PF01222//PF03137//PF00050//PF07648	Herpesvirus tegument protein, N-terminal conserved region//Major Facilitator Superfamily//Ergosterol biosynthesis ERG4/ERG24 family//Organic Anion Transporter Polypeptide (OATP) family//Kazal-type serine protease inhibitor domain//Kazal-type serine protease inhibitor domain	GO:0055085//GO:0006508//GO:0006810	transmembrane transport//proteolysis//transport	GO:0005515//GO:0005215//GO:0008233	protein binding//transporter activity//peptidase activity	GO:0016020//GO:0016021	membrane//integral component of membrane	KOG3626	Organic anion transporter
Cluster-58773.229261	111.138	345.428	-1.636	6.6219e-05	3483	762147333	XP_011456975.1	5.7e-49	PREDICTED: solute carrier family 46 member 3-like [Crassostrea gigas]	961135438	XM_014932043.1	0	PREDICTED: Octopus bimaculoides proton-coupled folate transporter-like (LOC106881588), mRNA	--	--	--	--	Q7ZWG6	4.8e-35	Proton-coupled folate transporter OS=Danio rerio GN=slc46a1 PE=2 SV=1	PF07690	Major Facilitator Superfamily	GO:0055085	transmembrane transport	--	--	GO:0016021	integral component of membrane	--	--
Cluster-58773.203696	9.0098	60.6641	-2.7513	6.7159e-05	255	--	--	--	--	--	--	--	--	--	--	--	--	--	--	--	--	--	--	--	--	--	--	--	--	--
Cluster-58773.89589	240.575	689.178	-1.5184	7.2154e-05	515	545210358	XP_005607982.1	6.9e-28	PREDICTED: neurotrypsin [Equus caballus]	961075121	XM_014934994.1	0	PREDICTED: Octopus bimaculoides deleted in malignant brain tumors 1 protein-like (LOC106883855), mRNA	--	--	--	--	O08762	2.1e-27	Neurotrypsin OS=Mus musculus GN=Prss12 PE=2 SV=1	PF00530//PF15494	Scavenger receptor cysteine-rich domain//Scavenger receptor cysteine-rich domain	GO:0007165	signal transduction	GO:0005044	scavenger receptor activity	GO:0016020	membrane	--	--
Cluster-58773.108886	38.7974	213.594	-2.7331	7.2491e-05	452	597751657	XP_007237709.1	8.1e-33	PREDICTED: hephaestin-like protein 1-like [Astyanax mexicanus]	961090747	XM_014916428.1	0	PREDICTED: Octopus bimaculoides hephaestin-like protein (LOC106870385), mRNA	--	--	--	--	Q6MZM0	6e-31	Hephaestin-like protein 1 OS=Homo sapiens GN=HEPHL1 PE=2 SV=2	PF07732	Multicopper oxidase	--	--	--	--	GO:0005739	mitochondrion	--	--
Cluster-58773.171615	10.1747	67.6511	-2.4608	7.2491e-05	555	--	--	--	--	961111798	XM_014923695.1	9.05117e-52	PREDICTED: Octopus bimaculoides uncharacterized protein RP689-like (LOC106875516), transcript variant X2, mRNA	--	--	--	--	--	--	--	PF08039	Mitochondrial proteolipid	--	--	GO:0005507	copper ion binding	--	--	--	--
Cluster-58773.235013	0.170621	13.3692	-6.292	7.3673e-05	947	699245937	XP_009859587.1	8e-14	PREDICTED: uncharacterized protein LOC100178034 isoform X1 [Ciona intestinalis]	961136447	XM_014932379.1	0	PREDICTED: Octopus bimaculoides uncharacterized LOC106881861 (LOC106881861), mRNA	--	--	--	--	--	--	--	PF01216	Calsequestrin	--	--	GO:0005509	calcium ion binding	--	--	--	--
Cluster-58773.176771	330.124	847.889	-1.3609	7.6712e-05	2552	395502464	XP_003755600.1	5.6e-70	PREDICTED: retinaldehyde-binding protein 1 [Sarcophilus harrisii]	961089098	XM_014915854.1	0	PREDICTED: Octopus bimaculoides retinaldehyde-binding protein 1-like (LOC106869923), mRNA	--	--	--	--	Q9Z275	4.4e-62	Retinaldehyde-binding protein 1 OS=Mus musculus GN=Rlbp1 PE=1 SV=3	PF01231	Indoleamine 2,3-dioxygenase	--	--	GO:0020037	heme binding	--	--	KOG1471	Phosphatidylinositol transfer protein SEC14 and related proteins
Cluster-58773.193073	17.797	125.029	-2.8126	7.898e-05	5223	871240706	XP_012939441.1	6.1e-132	PREDICTED: heparan-alpha-glucosaminide N-acetyltransferase-like [Aplysia californica]	961141043	XM_014933978.1	0	PREDICTED: Octopus bimaculoides heparan-alpha-glucosaminide N-acetyltransferase-like (LOC106883086), mRNA	--	--	--	--	Q3UDW8	4.9e-108	Heparan-alpha-glucosaminide N-acetyltransferase OS=Mus musculus GN=Hgsnat PE=1 SV=2	--	--	--	--	--	--	--	--	KOG4683	Uncharacterized conserved protein
Cluster-58773.210657	15.3217	83.5067	-2.4463	7.902e-05	2597	--	--	--	--	--	--	--	--	--	--	--	--	--	--	--	--	--	--	--	--	--	--	--	--	--
Cluster-58773.81184	1994.09	4019.11	-1.0111	7.995e-05	3553	--	--	--	--	961074876	XM_014934912.1	0	PREDICTED: Octopus bimaculoides uncharacterized LOC106883781 (LOC106883781), transcript variant X1, mRNA	--	--	--	--	--	--	--	PF01080//PF06305	Presenilin//Protein of unknown function (DUF1049)	--	--	GO:0004190	aspartic-type endopeptidase activity	GO:0005887//GO:0016021	integral component of plasma membrane//integral component of membrane	--	--
Cluster-58773.87232	0.0001	319.257	-21.6063	8.0682e-05	5332	762128436	XP_011447322.1	2.2e-214	PREDICTED: arf-GAP with Rho-GAP domain, ANK repeat and PH domain-containing protein 2-like isoform X4 [Crassostrea gigas]	961092195	XM_014916930.1	0	PREDICTED: Octopus bimaculoides arf-GAP with Rho-GAP domain, ANK repeat and PH domain-containing protein 1-like (LOC106870742), transcript variant X3, mRNA	--	--	--	--	Q8BZ05	7.9e-114	Arf-GAP with Rho-GAP domain, ANK repeat and PH domain-containing protein 2 OS=Mus musculus GN=Arap2 PE=1 SV=2	PF07647//PF00536//PF01412//PF00620	SAM domain (Sterile alpha motif)//SAM domain (Sterile alpha motif)//Putative GTPase activating protein for Arf//RhoGAP domain	GO:0007165	signal transduction	GO:0005096//GO:0005515	GTPase activator activity//protein binding	--	--	KOG1117	Rho- and Arf-GTPase activating protein ARAP3
Cluster-58773.131732	1721.74	3510.9	-1.028	8.0729e-05	1903	676486982	XP_009064151.1	2.1e-199	hypothetical protein LOTGIDRAFT_235910 [Lottia gigantea]>gi|556096586|gb|ESO85238.1| hypothetical protein LOTGIDRAFT_235910 [Lottia gigantea]	961114342	XM_014924576.1	0	PREDICTED: Octopus bimaculoides thioredoxin reductase 1, cytoplasmic-like (LOC106876152), mRNA	K00384	trxB	thioredoxin reductase (NADPH)	http://www.genome.jp/dbget-bin/www_bget?ko:K00384	Q16881	4.6e-189	Thioredoxin reductase 1, cytoplasmic OS=Homo sapiens GN=TXNRD1 PE=1 SV=3	PF01134//PF12831//PF02852//PF07992//PF00462//PF13417//PF00380//PF07156//PF00070//PF13409//PF01266	Glucose inhibited division protein A//FAD dependent oxidoreductase//Pyridine nucleotide-disulphide oxidoreductase, dimerisation domain//Pyridine nucleotide-disulphide oxidoreductase//Glutaredoxin//Glutathione S-transferase, N-terminal domain//Ribosomal protein S9/S16//Prenylcysteine lyase//Pyridine nucleotide-disulphide oxidoreductase//Glutathione S-transferase, N-terminal domain//FAD dependent o…	GO:0045454//GO:0006412//GO:0008033//GO:0006118//GO:0055114//GO:0030328//GO:0042254	cell redox homeostasis//translation//tRNA processing//obsolete electron transport//oxidation-reduction process//prenylcysteine catabolic process//ribosome biogenesis	GO:0050660//GO:0016491//GO:0005515//GO:0003735//GO:0015035//GO:0009055//GO:0016670	flavin adenine dinucleotide binding//oxidoreductase activity//protein binding//structural constituent of ribosome//protein disulfide oxidoreductase activity//electron carrier activity//oxidoreductase activity, acting on a sulfur group of donors, oxygen as acceptor	GO:0005840	ribosome	KOG4716	Thioredoxin reductase
Cluster-58773.198873	0.170621	18.6905	-6.7754	9.268e-05	2281	675380365	KFM73267.1	7e-32	Monocarboxylate transporter 9, partial [Stegodyphus mimosarum]	961118810	XM_014926259.1	0	PREDICTED: Octopus bimaculoides uncharacterized LOC106877371 (LOC106877371), partial mRNA	--	--	--	--	Q503M4	2e-13	Monocarboxylate transporter 12-B OS=Danio rerio GN=slc16a12b PE=2 SV=1	PF07690//PF00335	Major Facilitator Superfamily//Tetraspanin family	GO:0055085	transmembrane transport	--	--	GO:0016021	integral component of membrane	--	--
Cluster-58773.161292	715.24	1651.88	-1.2076	9.268e-05	267	--	--	--	--	961072881	XM_014928511.1	1.06842e-92	PREDICTED: Octopus bimaculoides uncharacterized LOC106879077 (LOC106879077), mRNA	--	--	--	--	--	--	--	--	--	--	--	--	--	--	--	--	--
Cluster-58773.202999	18.3874	93.7889	-2.3507	9.3007e-05	515	307196234	EFN77880.1	2.2e-10	hypothetical protein EAI_00561, partial [Harpegnathos saltator]	--	--	--	--	--	--	--	--	--	--	--	--	--	--	--	--	--	--	--	--	--
Cluster-58773.241847	45.7426	180.778	-1.9826	9.449e-05	1940	676465352	XP_009057216.1	1.1e-155	hypothetical protein LOTGIDRAFT_227502 [Lottia gigantea]>gi|556103443|gb|ESO92095.1| hypothetical protein LOTGIDRAFT_227502 [Lottia gigantea]	961105315	XM_014921444.1	0	PREDICTED: Octopus bimaculoides carboxypeptidase Q-like (LOC106873911), mRNA	--	--	--	--	Q9Y646	1.6e-149	Carboxypeptidase Q OS=Homo sapiens GN=CPQ PE=1 SV=1	PF01546	Peptidase family M20/M25/M40	GO:0008152	metabolic process	GO:0016787	hydrolase activity	--	--	KOG2195	Transferrin receptor and related proteins containing the protease-associated (PA) domain
Cluster-58773.154532	60.8576	215.257	-1.8225	9.5239e-05	238	--	--	--	--	961128249	XM_014929520.1	7.49631e-69	PREDICTED: Octopus bimaculoides uncharacterized LOC106879812 (LOC106879812), mRNA	--	--	--	--	--	--	--	--	--	--	--	--	--	--	--	--	--
Cluster-58773.161044	14.6734	191.361	-3.705	9.6782e-05	2688	--	--	--	--	--	--	--	--	--	--	--	--	--	--	--	--	--	--	--	--	--	--	--	--	--
Cluster-58773.134334	603.466	1382.68	-1.1961	9.8656e-05	465	--	--	--	--	--	--	--	--	--	--	--	--	--	--	--	PF01607	Chitin binding Peritrophin-A domain	GO:0006030	chitin metabolic process	GO:0008061	chitin binding	GO:0005576	extracellular region	--	--
Cluster-58773.174304	171.198	485.978	-1.5052	0.00013069	405	--	--	--	--	--	--	--	--	--	--	--	--	--	--	--	--	--	--	--	--	--	--	--	--	--
Cluster-58773.43960	507.701	1290.46	-1.3458	0.00013626	605	676460331	XP_009055588.1	2.7e-23	hypothetical protein LOTGIDRAFT_228660 [Lottia gigantea]>gi|556105325|gb|ESO93977.1| hypothetical protein LOTGIDRAFT_228660 [Lottia gigantea]	961125625	XR_001410602.1	5.4456e-114	PREDICTED: Octopus bimaculoides uncharacterized LOC106879171 (LOC106879171), ncRNA	--	--	--	--	Q9IBG7	1e-09	Kielin/chordin-like protein OS=Xenopus laevis GN=kcp PE=2 SV=1	PF00093//PF05375	von Willebrand factor type C domain//Pacifastin inhibitor (LCMII)	--	--	GO:0005515//GO:0030414	protein binding//peptidase inhibitor activity	--	--	--	--
Cluster-58773.106387	16.5137	86.7159	-2.3926	0.00014537	549	595744435	AHM92582.1	2.9e-40	chitotriosidase [Euprymna scolopes]	961092264	XM_014916957.1	9.69744e-176	PREDICTED: Octopus bimaculoides acidic mammalian chitinase-like (LOC106870760), mRNA	K01183	E3.2.1.14	chitinase	http://www.genome.jp/dbget-bin/www_bget?ko:K01183	Q6RY07	1.2e-20	Acidic mammalian chitinase OS=Rattus norvegicus GN=Chia PE=2 SV=1	PF00704	Glycosyl hydrolases family 18	GO:0005975	carbohydrate metabolic process	GO:0004553	hydrolase activity, hydrolyzing O-glycosyl compounds	--	--	KOG2806	Chitinase
Cluster-58773.135223	491.622	1645.42	-1.7428	0.00014585	4296	762084349	XP_011424659.1	0	PREDICTED: pyruvate carboxylase, mitochondrial-like isoform X4 [Crassostrea gigas]	961114947	XM_014924857.1	0	PREDICTED: Octopus bimaculoides pyruvate carboxylase, mitochondrial-like (LOC106876357), transcript variant X1, mRNA	--	--	--	--	Q29RK2	0	Pyruvate carboxylase, mitochondrial OS=Bos taurus GN=PC PE=2 SV=2	PF00682//PF02655//PF02196//PF02786//PF07478//PF05896	HMGL-like//ATP-grasp domain//Raf-like Ras-binding domain//Carbamoyl-phosphate synthase L chain, ATP binding domain//D-ala D-ala ligase C-terminus//Na(+)-translocating NADH-quinone reductase subunit A (NQRA)	GO:0046436//GO:0006118//GO:0007165//GO:0009252//GO:0055114//GO:0006814	D-alanine metabolic process//obsolete electron transport//signal transduction//peptidoglycan biosynthetic process//oxidation-reduction process//sodium ion transport	GO:0008716//GO:0016655//GO:0005524//GO:0005057//GO:0003824//GO:0046872	D-alanine-D-alanine ligase activity//oxidoreductase activity, acting on NAD(P)H, quinone or similar compound as acceptor//ATP binding//receptor signaling protein activity//catalytic activity//metal ion binding	--	--	KOG0369	Pyruvate carboxylase
Cluster-58773.162309	178.14	495.733	-1.4765	0.00015615	1116	52550954	AAU84460.1	7.8e-202	hemocyanin A-type [Enteroctopus dofleini]	52550953	AY751301.1	0	Octopus dofleini hemocyanin A-type (HA) gene, exons a through f2 and partial cds	--	--	--	--	O61363	1.2e-200	Hemocyanin G-type, units Oda to Odg OS=Enteroctopus dofleini GN=ODHCY PE=1 SV=1	PF00264	Common central domain of tyrosinase	GO:0008152	metabolic process	GO:0016491	oxidoreductase activity	--	--	--	--
Cluster-58773.109974	1.7699	24.896	-16.7561	0.00016043	2180	762142591	XP_011454520.1	8.3e-99	PREDICTED: inter-alpha-trypsin inhibitor heavy chain H3-like [Crassostrea gigas]	961127656	XM_014929321.1	0	PREDICTED: Octopus bimaculoides inter-alpha-trypsin inhibitor heavy chain H3-like (LOC106879656), partial mRNA	--	--	--	--	A6X935	8e-81	Inter alpha-trypsin inhibitor, heavy chain 4 OS=Mus musculus GN=Itih4 PE=1 SV=2	PF08496	Peptidase family S49 N-terminal	GO:0005975	carbohydrate metabolic process	GO:0004553	hydrolase activity, hydrolyzing O-glycosyl compounds	--	--	--	--
Cluster-58773.173979	1205.22	2865.57	-3.8142	0.00016043	2244	397455174	AFO53261.1	3.5e-92	chitinase-3 [Hyriopsis cumingii]	961132073	XM_014930866.1	3.47467e-121	PREDICTED: Octopus bimaculoides chitotriosidase-1-like (LOC106880768), partial mRNA	--	--	--	--	Q13231	6.1e-84	Chitotriosidase-1 OS=Homo sapiens GN=CHIT1 PE=1 SV=1	PF00704	Glycosyl hydrolases family 18	GO:0055114	oxidation-reduction process	GO:0020037//GO:0016705//GO:0005506	heme binding//oxidoreductase activity, acting on paired donors, with incorporation or reduction of molecular oxygen//iron ion binding	GO:0016020	membrane	KOG2806	Chitinase
Cluster-58773.145767	0.0001	11.0684	-1.2495	0.00016043	2321	229893916	ACQ90303.1	7e-96	cytochrome P450 [Hyriopsis cumingii]	961084563	XM_014914254.1	0	PREDICTED: Octopus bimaculoides cytochrome P450 3A31-like (LOC106868827), transcript variant X1, mRNA	--	--	--	--	Q29496	5e-89	Cytochrome P450 3A24 OS=Ovis aries GN=CYP3A24 PE=2 SV=1	PF00067//PF01445	Cytochrome P450//Viral small hydrophobic protein	--	--	GO:0004252	serine-type endopeptidase activity	GO:0005886	plasma membrane	KOG0158	Cytochrome P450 CYP3/CYP5/CYP6/CYP9 subfamilies
Cluster-58773.141748	746.817	1637.57	-1.1327	0.00016372	1601	--	--	--	--	--	--	--	--	--	--	--	--	--	--	--	--	--	--	--	--	--	--	--	--	--
Cluster-58773.161720	96.6556	311.058	-1.6863	0.00020905	1237	260824165	XP_002607038.1	2.1e-22	hypothetical protein BRAFLDRAFT_127065 [Branchiostoma floridae]>gi|229292384|gb|EEN63048.1| hypothetical protein BRAFLDRAFT_127065 [Branchiostoma floridae]	961084400	XM_014914200.1	0	PREDICTED: Octopus bimaculoides transforming growth factor-beta-induced protein ig-h3-like (LOC106868782), transcript variant X1, mRNA	--	--	--	--	P82198	1.1e-10	Transforming growth factor-beta-induced protein ig-h3 OS=Mus musculus GN=Tgfbi PE=1 SV=1	--	--	--	--	--	--	--	--	--	--
Cluster-58773.164156	85.716	273.829	-1.6756	0.00022455	573	871246464	XP_012940508.1	2.6e-28	PREDICTED: uncharacterized protein LOC101848762 [Aplysia californica]	961118709	XM_014926223.1	0	PREDICTED: Octopus bimaculoides collagen alpha-6(VI) chain-like (LOC106877343), mRNA	--	--	--	--	A2AX52	5.8e-23	Collagen alpha-4(VI) chain OS=Mus musculus GN=Col6a4 PE=1 SV=2	--	--	--	--	--	--	--	--	--	--
Cluster-58773.108883	32.3188	134.688	-2.0592	0.00022879	515	558214676	XP_006134469.1	2.7e-40	PREDICTED: hephaestin-like protein 1 isoform X5 [Pelodiscus sinensis]	961090747	XM_014916428.1	0	PREDICTED: Octopus bimaculoides hephaestin-like protein (LOC106870385), mRNA	--	--	--	--	B3EWZ9	5.2e-39	Hephaestin-like protein OS=Acropora millepora PE=1 SV=1	PF07732	Multicopper oxidase	--	--	GO:0005507	copper ion binding	--	--	--	--
Cluster-58773.219291	35.678	145.372	-2.0266	0.00024433	2141	762102668	XP_011433834.1	3.2e-18	PREDICTED: organic cation transporter protein-like isoform X1 [Crassostrea gigas]	961132469	XM_014931007.1	0	PREDICTED: Octopus bimaculoides organic cation transporter protein-like (LOC106880859), transcript variant X3, mRNA	--	--	--	--	Q7ZX53	2.8e-17	Solute carrier family 22 member 15-like OS=Xenopus laevis GN=slc22a15b PE=2 SV=1	PF07690	Major Facilitator Superfamily	GO:0055085	transmembrane transport	--	--	GO:0016021	integral component of membrane	KOG0255	Synaptic vesicle transporter SVOP and related transporters (major facilitator superfamily)
Cluster-58773.176191	17051.1	29954.3	-0.8129	0.0002527	4625	762092217	XP_011428535.1	5.3e-244	PREDICTED: uncharacterized protein LOC105329078 isoform X2 [Crassostrea gigas]	961071467	XM_014923581.1	0	PREDICTED: Octopus bimaculoides cysteine-rich motor neuron 1 protein-like (LOC106875429), mRNA	--	--	--	--	A6NMZ7	8.8e-69	Collagen alpha-6(VI) chain OS=Homo sapiens GN=COL6A6 PE=1 SV=2	PF00093	von Willebrand factor type C domain	--	--	GO:0005515	protein binding	--	--	--	--
Cluster-58773.137252	398.664	942.052	-1.2406	0.00025814	3308	405964190	EKC29705.1	2.4e-222	Carnitine O-palmitoyltransferase 1, liver isoform [Crassostrea gigas]	961136305	XM_014932331.1	0	PREDICTED: Octopus bimaculoides carnitine O-palmitoyltransferase 1, liver isoform-like (LOC106881816), mRNA	--	--	--	--	P32198	4.7e-149	Carnitine O-palmitoyltransferase 1, liver isoform OS=Rattus norvegicus GN=Cpt1a PE=1 SV=2	PF00755	Choline/Carnitine o-acyltransferase	--	--	GO:0016746	transferase activity, transferring acyl groups	--	--	KOG3716	Carnitine O-acyltransferase CPTI
Cluster-58773.233180	28.1869	200.238	-2.8286	0.00026779	926	159741	AAA16613.1	4.1e-23	omega-crystallin [Enteroctopus dofleini]	961104898	XM_014921309.1	7.87006e-169	PREDICTED: Octopus bimaculoides 70 kDa neurofilament protein-like (LOC106873794), mRNA	--	--	--	--	P31732	3.6e-14	Muscle cell intermediate filament protein OV71 (Fragment) OS=Onchocerca volvulus GN=OV71 PE=2 SV=1	PF08912//PF00038//PF07926//PF03255	Rho Binding//Intermediate filament protein//TPR/MLP1/MLP2-like protein//Acetyl co-enzyme A carboxylase carboxyltransferase alpha subunit	GO:0006606//GO:0006090//GO:0006633	protein import into nucleus//pyruvate metabolic process//fatty acid biosynthetic process	GO:0003989//GO:0005198//GO:0017048	acetyl-CoA carboxylase activity//structural molecule activity//Rho GTPase binding	GO:0009317//GO:0005882	acetyl-CoA carboxylase complex//intermediate filament	--	--
Cluster-58773.3592	75.0082	254.781	-1.7641	0.00027141	1401	676454209	XP_009053606.1	3.3e-72	hypothetical protein LOTGIDRAFT_116769, partial [Lottia gigantea]>gi|556107106|gb|ESO95758.1| hypothetical protein LOTGIDRAFT_116769, partial [Lottia gigantea]	961112443	XM_014923916.1	0	PREDICTED: Octopus bimaculoides uncharacterized LOC106875676 (LOC106875676), mRNA	--	--	--	--	--	--	--	PF01522	Polysaccharide deacetylase	GO:0005975//GO:0006807	carbohydrate metabolic process//nitrogen compound metabolic process	GO:0016810	hydrolase activity, acting on carbon-nitrogen (but not peptide) bonds	--	--	--	--
Cluster-58773.169115	62034.7	101592	-0.71164	0.00027546	1784	403314481	AFR36903.1	8.7e-62	ferritin [Sepiella maindroni]	961087923	XM_014915447.1	0	PREDICTED: Octopus bimaculoides soma ferritin-like (LOC106869632), mRNA	--	--	--	--	P42577	9.3e-51	Soma ferritin OS=Lymnaea stagnalis PE=2 SV=2	PF02915//PF00210//PF03232	Rubrerythrin//Ferritin-like domain//Ubiquinone biosynthesis protein COQ7	GO:0006744//GO:0055114//GO:0006879	ubiquinone biosynthetic process//oxidation-reduction process//cellular iron ion homeostasis	GO:0046872//GO:0008199//GO:0016491	metal ion binding//ferric iron binding//oxidoreductase activity	--	--	KOG2332	Ferritin
Cluster-81598.0	0.0001	10.3213	-16.6553	0.00030022	643	--	--	--	--	--	--	--	--	--	--	--	--	--	--	--	--	--	--	--	--	--	--	--	--	--
Cluster-58773.38572	4.86016	39.9727	-3.0399	0.00030022	653	871251229	XP_012941335.1	5.4e-62	PREDICTED: chitotriosidase-1-like [Aplysia californica]	961071618	XM_014924159.1	0	PREDICTED: Octopus bimaculoides chitotriosidase-1-like (LOC106875857), mRNA	--	--	--	--	Q6RY07	7.5e-59	Acidic mammalian chitinase OS=Rattus norvegicus GN=Chia PE=2 SV=1	PF00704	Glycosyl hydrolases family 18	GO:0005975	carbohydrate metabolic process	GO:0004553	hydrolase activity, hydrolyzing O-glycosyl compounds	--	--	KOG2806	Chitinase
Cluster-58773.162685	85.0439	341.933	-2.0074	0.00030022	1210	512931090	XP_004932222.1	1.3e-08	PREDICTED: putative uncharacterized protein DDB_G0282133 [Bombyx mori]>gi|827560081|ref|XP_012550980.1| PREDICTED: putative uncharacterized protein DDB_G0282133 [Bombyx mori]	961135497	XM_014932064.1	0	PREDICTED: Octopus bimaculoides putative transmembrane protein DDB_G0267530 (LOC106881601), partial mRNA	--	--	--	--	--	--	--	PF04505//PF10099//PF04893	Interferon-induced transmembrane protein//Anti-sigma-K factor rskA//Yip1 domain	GO:0009607	response to biotic stimulus	--	--	GO:0016020//GO:0016021//GO:0005886	membrane//integral component of membrane//plasma membrane	--	--
Cluster-58773.149251	6.3913	46.0698	-2.8496	0.00032349	1928	405967888	EKC33007.1	1e-07	NGFI-A-binding-like protein [Crassostrea gigas]	961078910	XM_014912299.1	0	PREDICTED: Octopus bimaculoides NGFI-A-binding protein 1-like (LOC106867422), transcript variant X7, mRNA	--	--	--	--	--	--	--	PF01708	Geminivirus putative movement protein	GO:0046740	transport of virus in host, cell to cell	--	--	GO:0016021	integral component of membrane	--	--
Cluster-58773.179284	24.3338	105.636	-2.1181	0.00032385	495	260805488	XP_002597619.1	2.5e-43	hypothetical protein BRAFLDRAFT_225844 [Branchiostoma floridae]>gi|229282884|gb|EEN53631.1| hypothetical protein BRAFLDRAFT_225844, partial [Branchiostoma floridae]	961123112	XM_014927747.1	0	PREDICTED: Octopus bimaculoides pancreatic triacylglycerol lipase-like (LOC106878519), mRNA	--	--	--	--	P54316	5.2e-36	Inactive pancreatic lipase-related protein 1 OS=Rattus norvegicus GN=Pnliprp1 PE=2 SV=1	PF01674//PF00975	Lipase (class 2)//Thioesterase domain	GO:0009058	biosynthetic process	GO:0016787//GO:0003824//GO:0016788	hydrolase activity//catalytic activity//hydrolase activity, acting on ester bonds	--	--	--	--
Cluster-58773.152782	2.38869	28.1056	-3.5566	0.00032896	3678	--	--	--	--	961078995	XM_014912327.1	1.70903e-71	PREDICTED: Octopus bimaculoides vacuolar protein sorting-associated protein 72 homolog (LOC106867449), mRNA	--	--	--	--	--	--	--	--	--	--	--	--	--	--	--	--	--
Cluster-58773.147728	267.186	743.101	-1.4757	0.0003568	1588	395504147	XP_003756418.1	2.5e-68	PREDICTED: retinol dehydrogenase 11 [Sarcophilus harrisii]	961128972	XM_014929776.1	0	PREDICTED: Octopus bimaculoides retinol dehydrogenase 11-like (LOC106879995), transcript variant X1, mRNA	--	--	--	--	Q9QYF1	1.8e-69	Retinol dehydrogenase 11 OS=Mus musculus GN=Rdh11 PE=1 SV=2	PF00106//PF03435//PF01959//PF01370	short chain dehydrogenase//Saccharopine dehydrogenase NADP binding domain//3-dehydroquinate synthase (EC 4.6.1.3)//NAD dependent epimerase/dehydratase family	GO:0008152//GO:0006571//GO:0055114//GO:0009073//GO:0009094//GO:0000162	metabolic process//tyrosine biosynthetic process//oxidation-reduction process//aromatic amino acid family biosynthetic process//L-phenylalanine biosynthetic process//tryptophan biosynthetic process	GO:0050662//GO:0003824//GO:0016491//GO:0003856	coenzyme binding//catalytic activity//oxidoreductase activity//3-dehydroquinate synthase activity	--	--	KOG1208	Dehydrogenases with different specificities (related to short-chain alcohol dehydrogenases)
Cluster-58773.152754	0.560706	17.7605	-4.9853	0.00037189	305	--	--	--	--	--	--	--	--	--	--	--	--	--	--	--	--	--	--	--	--	--	--	--	--	--
Cluster-58773.194233	4.38621	35.2171	-3.0052	0.00038012	429	--	--	--	--	961089971	XM_014916156.1	1.39774e-93	PREDICTED: Octopus bimaculoides uncharacterized LOC106870156 (LOC106870156), mRNA	--	--	--	--	--	--	--	--	--	--	--	--	--	--	--	--	--
Cluster-58773.179681	0.0001	16.3423	-17.3182	0.00038613	2701	762112485	XP_011438984.1	1.4e-79	PREDICTED: protocadherin-11 X-linked-like [Crassostrea gigas]>gi|762112487|ref|XP_011438985.1| PREDICTED: protocadherin-11 X-linked-like [Crassostrea gigas]	961100227	XM_014919666.1	0	PREDICTED: Octopus bimaculoides protocadherin gamma-C4-like (LOC106872615), transcript variant X8, mRNA	--	--	--	--	Q8TAB3	4.2e-63	Protocadherin-19 OS=Homo sapiens GN=PCDH19 PE=1 SV=3	PF00028	Cadherin domain	GO:0007156	homophilic cell adhesion via plasma membrane adhesion molecules	GO:0005509	calcium ion binding	GO:0016020	membrane	--	--
Cluster-58773.173431	74.3522	278.286	-1.9041	0.00043044	5359	762119519	XP_011442670.1	0	PREDICTED: copper-transporting ATPase 1-like isoform X2 [Crassostrea gigas]	961118700	XM_014926219.1	0	PREDICTED: Octopus bimaculoides copper-transporting ATPase 1-like (LOC106877342), transcript variant X1, mRNA	--	--	--	--	Q04656	0	Copper-transporting ATPase 1 OS=Homo sapiens GN=ATP7A PE=1 SV=3	PF00122//PF08777//PF05829//PF04574//PF00403//PF04443	E1-E2 ATPase//RNA binding motif//Adenovirus late L2 mu core protein (Protein X)//Protein of unknown function (DUF592)//Heavy-metal-associated domain//Acyl-protein synthetase, LuxE	GO:0006476//GO:0006342//GO:0006355//GO:0008218//GO:0006807//GO:0030001	protein deacetylation//chromatin silencing//regulation of transcription, DNA-templated//bioluminescence//nitrogen compound metabolic process//metal ion transport	GO:0046872//GO:0016811//GO:0003723//GO:0051287//GO:0000166//GO:0003677//GO:0047474//GO:0017136//GO:0008270	metal ion binding//hydrolase activity, acting on carbon-nitrogen (but not peptide) bonds, in linear amides//RNA binding//NAD binding//nucleotide binding//DNA binding//long-chain fatty acid luciferin component ligase activity//NAD-dependent histone deacetylase activity//zinc ion binding	GO:0019013//GO:0000118	viral nucleocapsid//histone deacetylase complex	KOG0207	Cation transport ATPase
Cluster-58773.163693	56.6093	400.531	-2.8228	0.00048957	674	762098834	XP_011431819.1	2.1e-08	PREDICTED: uncharacterized protein LOC105331373 [Crassostrea gigas]	961115829	XM_014925226.1	0	PREDICTED: Octopus bimaculoides cartilage matrix protein-like (LOC106876615), partial mRNA	--	--	--	--	--	--	--	--	--	--	--	--	--	--	--	--	--
Cluster-58773.123577	757.231	1848.96	-1.2879	0.00049477	1437	676490915	XP_009065425.1	1.3e-121	hypothetical protein LOTGIDRAFT_222286 [Lottia gigantea]>gi|556095193|gb|ESO83846.1| hypothetical protein LOTGIDRAFT_222286 [Lottia gigantea]	961073565	XM_014930807.1	0	PREDICTED: Octopus bimaculoides fatty acid hydroxylase domain-containing protein 2-like (LOC106880725), transcript variant X1, mRNA	--	--	--	--	Q9GKT2	7.3e-99	Fatty acid hydroxylase domain-containing protein 2 OS=Macaca fascicularis GN=FAXDC2 PE=2 SV=1	PF06459//PF04116	Ryanodine Receptor TM 4-6//Fatty acid hydroxylase superfamily	GO:0006874//GO:0055114//GO:0006633//GO:0006816	cellular calcium ion homeostasis//oxidation-reduction process//fatty acid biosynthetic process//calcium ion transport	GO:0005219//GO:0016491//GO:0005506	ryanodine-sensitive calcium-release channel activity//oxidoreductase activity//iron ion binding	GO:0016021//GO:0005622	integral component of membrane//intracellular	KOG0873	C-4 sterol methyl oxidase
Cluster-58773.169713	392.45	909.384	-1.2124	0.00051578	1563	443694096	ELT95313.1	1.9e-12	hypothetical protein CAPTEDRAFT_156850 [Capitella teleta]	961136438	XM_014932375.1	0	PREDICTED: Octopus bimaculoides macrophage migration inhibitory factor-like (LOC106881859), transcript variant X2, mRNA	--	--	--	--	Q76BK2	7.7e-09	Macrophage migration inhibitory factor OS=Xenopus laevis GN=mif PE=1 SV=1	PF08039	Mitochondrial proteolipid	--	--	--	--	GO:0005739	mitochondrion	--	--
Cluster-58773.180587	18.3656	131.794	-2.8432	0.00051673	3469	871272531	XP_012945368.1	2.4e-180	PREDICTED: phosphatidylinositol 4-phosphate 5-kinase type-1 alpha-like [Aplysia californica]	961140281	XM_014933710.1	0	PREDICTED: Octopus bimaculoides phosphatidylinositol 4-phosphate 5-kinase type-1 alpha-like (LOC106882892), transcript variant X4, mRNA	--	--	--	--	Q99755	7.6e-150	Phosphatidylinositol 4-phosphate 5-kinase type-1 alpha OS=Homo sapiens GN=PIP5K1A PE=1 SV=1	PF01504//PF02984//PF04049	Phosphatidylinositol-4-phosphate 5-Kinase//Cyclin, C-terminal domain//Anaphase promoting complex subunit 8 / Cdc23	GO:0046488//GO:0030071	phosphatidylinositol metabolic process//regulation of mitotic metaphase/anaphase transition	GO:0016307	phosphatidylinositol phosphate kinase activity	GO:0005680//GO:0005634	anaphase-promoting complex//nucleus	KOG0229	Phosphatidylinositol-4-phosphate 5-kinase
Cluster-58773.163694	821.007	1744.82	-2.5986	0.00058024	260	871259492	XP_005107268.2	3.8e-11	PREDICTED: uncharacterized protein LOC101847901 [Aplysia californica]	961089962	XM_014916152.1	1.70999e-100	PREDICTED: Octopus bimaculoides collagen alpha-1(XIV) chain-like (LOC106870153), partial mRNA	--	--	--	--	P32018	5.3e-08	Collagen alpha-1(XIV) chain OS=Gallus gallus GN=COL14A1 PE=1 SV=2	PF07196	Flagellin hook IN motif	GO:0006836//GO:0006812	neurotransmitter transport//cation transport	GO:0005328	neurotransmitter:sodium symporter activity	GO:0016021	integral component of membrane	--	--
Cluster-58773.119186	10.5799	64.0846	-1.6302	0.00058024	1071	--	--	--	--	961111996	XR_001410138.1	7.21542e-155	PREDICTED: Octopus bimaculoides uncharacterized LOC106875557 (LOC106875557), ncRNA	--	--	--	--	--	--	--	--	--	GO:0044781//GO:0006928	bacterial-type flagellum organization//movement of cell or subcellular component	--	--	GO:0009288	bacterial-type flagellum	--	--
Cluster-58773.99911	95.3345	295.11	-1.0876	0.00058024	2727	676476535	XP_009060824.1	9.3e-241	hypothetical protein LOTGIDRAFT_219163 [Lottia gigantea]>gi|556099762|gb|ESO88414.1| hypothetical protein LOTGIDRAFT_219163 [Lottia gigantea]	961098587	XM_014919096.1	0	PREDICTED: Octopus bimaculoides sodium-dependent proline transporter-like (LOC106872196), transcript variant X2, mRNA	K05038	SLC6A5S	solute carrier family 6 (neurotransmitter transporter, amino acid) member 5/7/9/14	http://www.genome.jp/dbget-bin/www_bget?ko:K05038	Q9Y345	8.3e-168	Sodium- and chloride-dependent glycine transporter 2 OS=Homo sapiens GN=SLC6A5 PE=1 SV=3	PF00209	Sodium:neurotransmitter symporter family	--	--	--	--	--	--	KOG3660	Sodium-neurotransmitter symporter
Cluster-58773.160866	8.51969	50.8461	-2.5773	0.00063867	798	--	--	--	--	961072884	XM_014928522.1	0	PREDICTED: Octopus bimaculoides uncharacterized LOC106879085 (LOC106879085), mRNA	--	--	--	--	--	--	--	PF01031//PF01817//PF05361//PF02881	Dynamin central region//Chorismate mutase type II//PKC-activated protein phosphatase-1 inhibitor//SRP54-type protein, helical bundle domain	GO:0042325//GO:0006614//GO:0046417	regulation of phosphorylation//SRP-dependent cotranslational protein targeting to membrane//chorismate metabolic process	GO:0005525	GTP binding	GO:0005737	cytoplasm	--	--
Cluster-58773.189753	0.0001	12.3631	-16.9157	0.0006633	2464	676434096	XP_009047115.1	8.1e-34	hypothetical protein LOTGIDRAFT_157086 [Lottia gigantea]>gi|556113305|gb|ESP01957.1| hypothetical protein LOTGIDRAFT_157086 [Lottia gigantea]	961128717	XM_014929684.1	0	PREDICTED: Octopus bimaculoides monocarboxylate transporter 2-like (LOC106879929), mRNA	--	--	--	--	G5E8K6	6.4e-18	Monocarboxylate transporter 6 OS=Mus musculus GN=Slc16a5 PE=3 SV=1	PF07690	Major Facilitator Superfamily	GO:0055085	transmembrane transport	--	--	GO:0016021	integral component of membrane	--	--
Cluster-58773.146042	10.3965	58.2564	-2.4863	0.0006633	692	676460842	XP_009055753.1	6.8e-55	hypothetical protein LOTGIDRAFT_215949 [Lottia gigantea]>gi|556104901|gb|ESO93553.1| hypothetical protein LOTGIDRAFT_215949 [Lottia gigantea]	961123128	XM_014927752.1	0	PREDICTED: Octopus bimaculoides inactive pancreatic lipase-related protein 1-like (LOC106878524), mRNA	--	--	--	--	Q17RR3	6.6e-37	Pancreatic lipase-related protein 3 OS=Homo sapiens GN=PNLIPRP3 PE=2 SV=2	--	--	--	--	--	--	--	--	--	--
Cluster-58773.219285	9.15143	51.7004	-2.4981	0.00069432	747	676473900	XP_009059970.1	1.9e-34	hypothetical protein LOTGIDRAFT_153985 [Lottia gigantea]>gi|556100267|gb|ESO88919.1| hypothetical protein LOTGIDRAFT_153985 [Lottia gigantea]	961132472	XR_001410786.1	0	PREDICTED: Octopus bimaculoides organic cation transporter protein-like (LOC106880859), transcript variant X4, misc_RNA	--	--	--	--	Q66J52	1.9e-26	Solute carrier family 22 member 6-B OS=Xenopus laevis GN=slc22a6-b PE=2 SV=1	PF05631//PF07690//PF00083	Sugar-tranasporters, 12 TM//Major Facilitator Superfamily//Sugar (and other) transporter	GO:0055085//GO:0015689	transmembrane transport//molybdate ion transport	GO:0015098//GO:0022857	molybdate ion transmembrane transporter activity//transmembrane transporter activity	GO:0016021	integral component of membrane	KOG0255	Synaptic vesicle transporter SVOP and related transporters (major facilitator superfamily)
Cluster-58773.26890	28.5124	113.335	-1.9909	0.00072607	1837	--	--	--	--	--	--	--	--	--	--	--	--	--	--	--	--	--	--	--	--	--	--	--	--	--
Cluster-58773.139891	661.769	1450.08	-1.1317	0.00073064	1077	762170314	XP_011423581.1	6.9e-38	PREDICTED: Williams-Beuren syndrome chromosomal region 27 protein-like isoform X2 [Crassostrea gigas]	961115003	XM_014924887.1	0	PREDICTED: Octopus bimaculoides uncharacterized LOC106876375 (LOC106876375), mRNA	--	--	--	--	Q8N6F8	1.5e-19	Williams-Beuren syndrome chromosomal region 27 protein OS=Homo sapiens GN=WBSCR27 PE=1 SV=2	PF07757//PF01209//PF05175//PF05891//PF08241	Predicted AdoMet-dependent methyltransferase//ubiE/COQ5 methyltransferase family//Methyltransferase small domain//AdoMet dependent proline di-methyltransferase//Methyltransferase domain	GO:0006480//GO:0008152	N-terminal protein amino acid methylation//metabolic process	GO:0008168	methyltransferase activity	--	--	--	--
Cluster-58773.100441	567.689	1209.83	-1.0916	0.00074539	2229	--	--	--	--	961095068	XM_014917920.1	0	PREDICTED: Octopus bimaculoides uncharacterized LOC106871447 (LOC106871447), mRNA	--	--	--	--	--	--	--	PF01734	Patatin-like phospholipase	GO:0006629	lipid metabolic process	--	--	--	--	--	--
Cluster-58773.133421	226.095	758.084	-1.7454	0.00075348	2028	676429600	XP_009045653.1	5.2e-103	hypothetical protein LOTGIDRAFT_237580 [Lottia gigantea]>gi|556115027|gb|ESP03679.1| hypothetical protein LOTGIDRAFT_237580 [Lottia gigantea]	961079387	XM_014912467.1	0	PREDICTED: Octopus bimaculoides motile sperm domain-containing protein 2-like (LOC106867559), mRNA	--	--	--	--	Q9CWP6	9.5e-68	Motile sperm domain-containing protein 2 OS=Mus musculus GN=Mospd2 PE=1 SV=2	--	--	--	--	--	--	--	--	KOG1471	Phosphatidylinositol transfer protein SEC14 and related proteins
Cluster-58773.187573	579.364	1555.48	-1.4248	0.00078203	2506	762133941	XP_011450186.1	1.9e-139	PREDICTED: 4-coumarate--CoA ligase-like [Crassostrea gigas]	961127907	XR_001410657.1	0	PREDICTED: Octopus bimaculoides uncharacterized LOC106879728 (LOC106879728), ncRNA	--	--	--	--	O24146	3.1e-100	4-coumarate--CoA ligase 2 OS=Nicotiana tabacum GN=4CL2 PE=1 SV=1	PF00501	AMP-binding enzyme	GO:0008152	metabolic process	GO:0003824	catalytic activity	--	--	KOG1176	Acyl-CoA synthetase
Cluster-58773.42742	14.8879	71.6487	-2.2668	0.00089632	642	557284512	XP_006025090.1	6.5e-52	PREDICTED: acidic mammalian chitinase-like [Alligator sinensis]	961071618	XM_014924159.1	4.77718e-70	PREDICTED: Octopus bimaculoides chitotriosidase-1-like (LOC106875857), mRNA	K01183	E3.2.1.14	chitinase	http://www.genome.jp/dbget-bin/www_bget?ko:K01183	Q91XA9	2.1e-45	Acidic mammalian chitinase OS=Mus musculus GN=Chia PE=1 SV=2	PF00704//PF01607	Glycosyl hydrolases family 18//Chitin binding Peritrophin-A domain	GO:0006030//GO:0005975	chitin metabolic process//carbohydrate metabolic process	GO:0004553//GO:0008061	hydrolase activity, hydrolyzing O-glycosyl compounds//chitin binding	GO:0005576	extracellular region	KOG2806	Chitinase
Cluster-58773.152893	0.0001	21.1436	-17.6899	0.00098427	1611	--	--	--	--	961076118	XM_014935325.1	0	PREDICTED: Octopus bimaculoides EF-hand calcium-binding domain-containing protein 14-like (LOC106884104), transcript variant X3, mRNA	--	--	--	--	--	--	--	--	--	--	--	--	--	--	--	--	--
Cluster-58773.145789	408.051	1055.72	-1.3714	0.00098661	2515	524915697	XP_005112640.1	1.7e-55	PREDICTED: cytochrome P450 3A24-like [Aplysia californica]>gi|524915699|ref|XP_005112641.1| PREDICTED: cytochrome P450 3A24-like [Aplysia californica]	961084570	XM_014914256.1	0	PREDICTED: Octopus bimaculoides cytochrome P450 3A31-like (LOC106868827), transcript variant X3, mRNA	--	--	--	--	O70537	6.5e-50	Cytochrome P450 3A31 OS=Mesocricetus auratus GN=CYP3A31 PE=2 SV=1	PF00067//PF01445	Cytochrome P450//Viral small hydrophobic protein	GO:0055114	oxidation-reduction process	GO:0005506//GO:0016705//GO:0020037	iron ion binding//oxidoreductase activity, acting on paired donors, with incorporation or reduction of molecular oxygen//heme binding	GO:0016020	membrane	KOG0158	Cytochrome P450 CYP3/CYP5/CYP6/CYP9 subfamilies
Cluster-58773.39608	15.975	81.1605	-2.345	0.0010194	449	--	--	--	--	961067758	XM_014933311.1	1.67961e-177	PREDICTED: Octopus bimaculoides A disintegrin and metalloproteinase with thrombospondin motifs 12-like (LOC106882557), mRNA	--	--	--	--	--	--	--	PF01562	Reprolysin family propeptide	GO:0006508	proteolysis	GO:0008270//GO:0004222	zinc ion binding//metalloendopeptidase activity	--	--	--	--
Cluster-58773.84427	306.75	803.896	-1.3899	0.001022	5087	847132402	XP_012819335.1	1.3e-89	PREDICTED: mucin-like protein [Xenopus (Silurana) tropicalis]	961139243	XM_014933350.1	0	PREDICTED: Octopus bimaculoides mucin-like protein (LOC106882610), partial mRNA	--	--	--	--	Q9DG42	5.9e-58	Protein yippee-like 1 OS=Coturnix coturnix japonica GN=YPEL1 PE=3 SV=1	PF07645//PF11606//PF06119//PF01333//PF00008//PF11857	Calcium-binding EGF domain//Family 31 carbohydrate binding protein//Nidogen-like//Apocytochrome F, C-terminal//EGF-like domain//Domain of unknown function (DUF3377)	GO:0007160//GO:0015979//GO:0006118	cell-matrix adhesion//photosynthesis//obsolete electron transport	GO:0009055//GO:0005515//GO:0005506//GO:0005509//GO:0033905//GO:0004222//GO:0020037	electron carrier activity//protein binding//iron ion binding//calcium ion binding//xylan endo-1,3-beta-xylosidase activity//metalloendopeptidase activity//heme binding	GO:0031361	integral component of thylakoid membrane	KOG3399	Predicted Yippee-type zinc-binding protein
Cluster-58773.39172	39.5203	143.261	-1.858	0.0010474	367	676484289	XP_009063298.1	2.9e-12	hypothetical protein LOTGIDRAFT_235630 [Lottia gigantea]>gi|556097399|gb|ESO86051.1| hypothetical protein LOTGIDRAFT_235630 [Lottia gigantea]	--	--	--	--	--	--	--	--	--	--	--	--	--	--	--	--	--	--	--	--	--
Cluster-58773.13254	0.193676	11.1391	-5.8458	0.0010625	675	--	--	--	--	--	--	--	--	--	--	--	--	--	--	--	--	--	--	--	--	--	--	--	--	--
Cluster-58773.118044	411.636	1082.06	-1.426	0.0010833	385	--	--	--	--	961067385	XM_014919550.1	5.50121e-127	PREDICTED: Octopus bimaculoides integumentary mucin A.1-like (LOC106872497), mRNA	--	--	--	--	--	--	--	--	--	GO:0007165//GO:0006355	signal transduction//regulation of transcription, DNA-templated	GO:0004871//GO:0003700	signal transducer activity//transcription factor activity, sequence-specific DNA binding	GO:0005634//GO:0005667	nucleus//transcription factor complex	--	--
Cluster-58773.39512	251.022	674.497	-1.3943	0.0010833	2447	675365232	KFM58134.1	5e-153	Signal transducer and activator of transcription 5A, partial [Stegodyphus mimosarum]	961070878	XM_014921538.1	0	PREDICTED: Octopus bimaculoides signal transducer and activator of transcription 5B-like (LOC106873988), mRNA	--	--	--	--	Q9TUZ0	2e-133	Signal transducer and activator of transcription 5B OS=Sus scrofa GN=STAT5B PE=2 SV=1	PF01017//PF02865//PF02864	STAT protein, all-alpha domain//STAT protein, protein interaction domain//STAT protein, DNA binding domain	--	--	--	--	--	--	KOG3667	STAT protein
Cluster-58773.147635	209.818	515.715	-1.2974	0.0011379	1795	676492788	XP_009066034.1	8.4e-81	hypothetical protein LOTGIDRAFT_236722 [Lottia gigantea]>gi|556094626|gb|ESO83279.1| hypothetical protein LOTGIDRAFT_236722 [Lottia gigantea]	961119809	XM_014926604.1	0	PREDICTED: Octopus bimaculoides lysoplasmalogenase-like protein TMEM86A (LOC106877659), partial mRNA	--	--	--	--	Q3MHQ7	1e-52	Lysoplasmalogenase-like protein TMEM86A OS=Bos taurus GN=TMEM86A PE=2 SV=1	PF07947	YhhN-like protein	--	--	--	--	GO:0016021	integral component of membrane	--	--
Cluster-58773.174509	7337.94	19072.2	-1.378	0.0012315	952	260829110	XP_002609505.1	2.1e-06	hypothetical protein BRAFLDRAFT_127655 [Branchiostoma floridae]>gi|229294862|gb|EEN65515.1| hypothetical protein BRAFLDRAFT_127655 [Branchiostoma floridae]	961127745	XM_014929353.1	0	PREDICTED: Octopus bimaculoides uncharacterized LOC106879678 (LOC106879678), mRNA	--	--	--	--	--	--	--	PF00811	Ependymin	GO:0007160	cell-matrix adhesion	GO:0005509	calcium ion binding	GO:0005576	extracellular region	--	--
Cluster-58773.201745	37.4245	137.449	-1.8768	0.001246	629	871238073	XP_005100208.2	1e-65	PREDICTED: pancreatic triacylglycerol lipase-like [Aplysia californica]	961099496	XM_014919409.1	0	PREDICTED: Octopus bimaculoides pancreatic triacylglycerol lipase-like (LOC106872413), mRNA	--	--	--	--	Q02157	1.5e-51	Pancreatic triacylglycerol lipase OS=Oryctolagus cuniculus GN=PNLIP PE=2 SV=1	--	--	--	--	--	--	--	--	--	--
Cluster-58773.240742	0.0001	12.4312	-16.9236	0.0012637	2260	--	--	--	--	--	--	--	--	--	--	--	--	--	--	--	--	--	--	--	--	--	--	--	--	--
Cluster-58773.91436	2.17926	21.9886	-3.3348	0.0012708	441	556592513	AGZ63441.1	1e-40	catalase [Octopus vulgaris]	961124143	XM_014928104.1	1.07457e-119	PREDICTED: Octopus bimaculoides catalase-like (LOC106878775), mRNA	--	--	--	--	P00432	1.3e-17	Catalase OS=Bos taurus GN=CAT PE=1 SV=3	--	--	--	--	--	--	--	--	KOG0047	Catalase
Cluster-58773.77817	0.0001	8.6089	-16.3935	0.0013394	501	--	--	--	--	961117159	XM_014925690.1	2.87697e-61	PREDICTED: Octopus bimaculoides tigger transposable element-derived protein 1-like (LOC106876935), mRNA	--	--	--	--	--	--	--	--	--	--	--	--	--	--	--	--	--
Cluster-58773.69124	41.3821	147.084	-1.8296	0.0013557	777	762116501	XP_011441088.1	2.2e-38	PREDICTED: collagen alpha-4(VI) chain-like [Crassostrea gigas]	961118709	XM_014926223.1	0	PREDICTED: Octopus bimaculoides collagen alpha-6(VI) chain-like (LOC106877343), mRNA	K16630	COL22A	collagen, type XXII, alpha	http://www.genome.jp/dbget-bin/www_bget?ko:K16630	A6NMZ7	6.2e-28	Collagen alpha-6(VI) chain OS=Homo sapiens GN=COL6A6 PE=1 SV=2	PF00920	Dehydratase family	GO:0008152	metabolic process	GO:0003824	catalytic activity	--	--	--	--
Cluster-58773.93060	25.1109	102.207	-2.0251	0.0013776	953	--	--	--	--	--	--	--	--	--	--	--	--	--	--	--	PF04505	Interferon-induced transmembrane protein	GO:0009607	response to biotic stimulus	--	--	GO:0016021	integral component of membrane	--	--
Cluster-58773.96121	929.887	1938.6	-1.0599	0.0013823	3790	762091411	XP_011428101.1	8.2e-86	PREDICTED: uncharacterized protein LOC105328789 [Crassostrea gigas]>gi|762091413|ref|XP_011428102.1| PREDICTED: uncharacterized protein LOC105328789 [Crassostrea gigas]>gi|405961225|gb|EKC27059.1| Mitosis inhibitor protein kinase wee1 [Crassostrea gigas]	961118715	XM_014926225.1	0	PREDICTED: Octopus bimaculoides uncharacterized LOC106877344 (LOC106877344), transcript variant X2, mRNA	--	--	--	--	Q6PAD2	8.9e-11	Serine/threonine-protein kinase PLK4 OS=Xenopus laevis GN=plk4 PE=2 SV=1	PF01926//PF06414//PF03193//PF00437//PF00735//PF05384//PF02367//PF00158//PF00069//PF07714//PF00005	50S ribosome-binding GTPase//Zeta toxin//Protein of unknown function, DUF258//Type II/IV secretion system protein//Septin//Sensor protein DegS//Threonylcarbamoyl adenosine biosynthesis protein TsaE//Sigma-54 interaction domain//Protein kinase domain//Protein tyrosine kinase//ABC transporter	GO:0007165//GO:0006468//GO:0006355//GO:0006810//GO:0002949	signal transduction//protein phosphorylation//regulation of transcription, DNA-templated//transport//tRNA threonylcarbamoyladenosine modification	GO:0016301//GO:0005525//GO:0005524//GO:0004672//GO:0003924//GO:0008134//GO:0016887	kinase activity//GTP binding//ATP binding//protein kinase activity//GTPase activity//transcription factor binding//ATPase activity	GO:0005667	transcription factor complex	KOG0583	Serine/threonine protein kinase
Cluster-58773.132247	404.347	904.938	-1.7773	0.001412	1663	159006	AAA16244.1	1.1e-183	peroxidase-like protein, partial [Euprymna scolopes]	961130811	XM_014930415.1	0	PREDICTED: Octopus bimaculoides peroxidase-like protein (LOC106880475), partial mRNA	--	--	--	--	A1KZ92	5.8e-55	Peroxidasin-like protein OS=Homo sapiens GN=PXDNL PE=1 SV=3	--	--	GO:0055114//GO:0002949	oxidation-reduction process//tRNA threonylcarbamoyladenosine modification	GO:0005506//GO:0020037//GO:0016705	iron ion binding//heme binding//oxidoreductase activity, acting on paired donors, with incorporation or reduction of molecular oxygen	--	--	KOG2408	Peroxidase/oxygenase
Cluster-58773.145770	39.5045	135.42	-1.1622	0.001412	527	591356082	XP_007072343.1	2.8e-45	PREDICTED: thromboxane-A synthase [Chelonia mydas]	961076286	XM_014935380.1	9.54963e-156	PREDICTED: Octopus bimaculoides cytochrome P450 3A17-like (LOC106884149), mRNA	--	--	--	--	Q64459	3.3e-41	Cytochrome P450 3A11 OS=Mus musculus GN=Cyp3a11 PE=1 SV=1	PF02367//PF00067	Threonylcarbamoyl adenosine biosynthesis protein TsaE//Cytochrome P450	--	--	--	--	--	--	KOG0158	Cytochrome P450 CYP3/CYP5/CYP6/CYP9 subfamilies
Cluster-58773.105023	69.828	213.336	-2.3199	0.001483	2261	676475684	XP_009060551.1	2.1e-89	hypothetical protein LOTGIDRAFT_234443 [Lottia gigantea]>gi|556100233|gb|ESO88885.1| hypothetical protein LOTGIDRAFT_234443 [Lottia gigantea]	961086287	XM_014914864.1	0	PREDICTED: Octopus bimaculoides mitochondrial carnitine/acylcarnitine carrier protein-like (LOC106869218), mRNA	K15109	SLC25A20_29, CACT, CACL, CRC1	solute carrier family 25 (mitochondrial carnitine/acylcarnitine transporter), member 20/29	http://www.genome.jp/dbget-bin/www_bget?ko:K15109	O43772	9.5e-85	Mitochondrial carnitine/acylcarnitine carrier protein OS=Homo sapiens GN=SLC25A20 PE=1 SV=1	--	--	GO:0006508	proteolysis	GO:0004252	serine-type endopeptidase activity	--	--	KOG0758	Mitochondrial carnitine-acylcarnitine carrier protein
Cluster-58773.157032	39.6914	198.173	-1.6112	0.001483	1209	126321463	XP_001364000.1	5.6e-97	PREDICTED: neuroendocrine convertase 1 [Monodelphis domestica]	961109887	XM_014923026.1	0	PREDICTED: Octopus bimaculoides neuroendocrine convertase 1-like (LOC106875064), mRNA	K01359	PCSK1	proprotein convertase subtilisin/kexin type 1	http://www.genome.jp/dbget-bin/www_bget?ko:K01359	P29120	5.8e-97	Neuroendocrine convertase 1 OS=Homo sapiens GN=PCSK1 PE=1 SV=2	PF00082	Subtilase family	--	--	--	--	--	--	KOG3525	Subtilisin-like proprotein convertase
Cluster-58773.34889	10.7819	56.3978	-2.387	0.0014876	309	--	--	--	--	--	--	--	--	--	--	--	--	--	--	--	--	--	--	--	--	--	--	--	--	--
Cluster-58773.121673	321.69	739.308	-1.2005	0.0014976	1298	--	--	--	--	961072354	XR_001410414.1	0	PREDICTED: Octopus bimaculoides uncharacterized LOC106877769 (LOC106877769), ncRNA	--	--	--	--	--	--	--	PF00452	Apoptosis regulator proteins, Bcl-2 family	GO:0042981	regulation of apoptotic process	--	--	--	--	--	--
Cluster-58773.182393	155.899	418.069	-1.4231	0.0015899	1120	260803876	XP_002596815.1	5.7e-43	hypothetical protein BRAFLDRAFT_130590 [Branchiostoma floridae]>gi|229282075|gb|EEN52827.1| hypothetical protein BRAFLDRAFT_130590 [Branchiostoma floridae]	961101403	XM_014920084.1	0	PREDICTED: Octopus bimaculoides papilin-like (LOC106872908), mRNA	--	--	--	--	Q868Z9	6e-40	Papilin OS=Drosophila melanogaster GN=Ppn PE=1 SV=2	PF00014	Kunitz/Bovine pancreatic trypsin inhibitor domain	--	--	GO:0004867	serine-type endopeptidase inhibitor activity	--	--	KOG4597	Serine proteinase inhibitor (KU family) with thrombospondin repeats
Cluster-58773.174303	262.804	782.762	-1.5746	0.0015932	388	--	--	--	--	--	--	--	--	--	--	--	--	--	--	--	--	--	--	--	--	--	--	--	--	--
Cluster-58773.158020	1384.49	3507.59	-1.3411	0.0016244	2173	--	--	--	--	961082002	XM_014913372.1	3.17794e-161	PREDICTED: Octopus bimaculoides uncharacterized LOC106868210 (LOC106868210), mRNA	--	--	--	--	--	--	--	PF09293	T4 RNase H, C terminal	--	--	GO:0003677//GO:0003824	DNA binding//catalytic activity	--	--	--	--
Cluster-58773.163700	66.1633	204.347	-1.6269	0.0016362	305	871246464	XP_012940508.1	4.1e-12	PREDICTED: uncharacterized protein LOC101848762 [Aplysia californica]	--	--	--	--	--	--	--	--	P32018	1.3e-10	Collagen alpha-1(XIV) chain OS=Gallus gallus GN=COL14A1 PE=1 SV=2	--	--	--	--	--	--	--	--	--	--
Cluster-58773.169118	5291.46	9326.9	-0.81773	0.0016639	947	403314481	AFR36903.1	3.4e-57	ferritin [Sepiella maindroni]	961087923	XM_014915447.1	0	PREDICTED: Octopus bimaculoides soma ferritin-like (LOC106869632), mRNA	--	--	--	--	P42577	1e-48	Soma ferritin OS=Lymnaea stagnalis PE=2 SV=2	PF03232//PF02915//PF00210	Ubiquinone biosynthesis protein COQ7//Rubrerythrin//Ferritin-like domain	GO:0006879//GO:0055114//GO:0006744	cellular iron ion homeostasis//oxidation-reduction process//ubiquinone biosynthetic process	GO:0016491//GO:0008199//GO:0046872	oxidoreductase activity//ferric iron binding//metal ion binding	--	--	KOG2332	Ferritin
Cluster-58773.129062	18.8155	152.545	-3.0192	0.0016806	1775	510859123	EPB74677.1	3.7e-12	hypothetical protein ANCCEY_06255 [Ancylostoma ceylanicum]	--	--	--	--	--	--	--	--	Q53H47	3.9e-09	Histone-lysine N-methyltransferase SETMAR OS=Homo sapiens GN=SETMAR PE=1 SV=2	--	--	--	--	--	--	--	--	--	--
Cluster-58773.37626	0.0001	34.8042	-18.4089	0.0016885	11710	762088224	XP_011426424.1	0	PREDICTED: uncharacterized protein LOC105327563 [Crassostrea gigas]	961129153	XM_014929839.1	0	PREDICTED: Octopus bimaculoides uncharacterized LOC106880038 (LOC106880038), partial mRNA	--	--	--	--	Q8N2E2	3e-25	von Willebrand factor D and EGF domain-containing protein OS=Homo sapiens GN=VWDE PE=2 SV=4	PF14861	Plant antimicrobial peptide	GO:0050832	defense response to fungus	--	--	--	--	--	--
Cluster-58773.149517	58.4807	179.14	-1.6151	0.0017047	704	871242728	XP_012939842.1	8e-27	PREDICTED: uncharacterized protein LOC106012199 [Aplysia californica]	--	--	--	--	--	--	--	--	--	--	--	--	--	--	--	--	--	--	--	--	--
Cluster-58773.84428	30.4221	232.138	-2.9318	0.0017374	4378	847132402	XP_012819335.1	1.1e-89	PREDICTED: mucin-like protein [Xenopus (Silurana) tropicalis]	961139243	XM_014933350.1	0	PREDICTED: Octopus bimaculoides mucin-like protein (LOC106882610), partial mRNA	--	--	--	--	B3EWY9	1.3e-45	Mucin-like protein (Fragment) OS=Acropora millepora PE=1 SV=1	PF07645//PF01333//PF00008//PF06119	Calcium-binding EGF domain//Apocytochrome F, C-terminal//EGF-like domain//Nidogen-like	GO:0006118//GO:0007160//GO:0015979	obsolete electron transport//cell-matrix adhesion//photosynthesis	GO:0020037//GO:0005515//GO:0005506//GO:0005509//GO:0009055	heme binding//protein binding//iron ion binding//calcium ion binding//electron carrier activity	GO:0031361	integral component of thylakoid membrane	KOG1217	Fibrillins and related proteins containing Ca2+-binding EGF-like domains
Cluster-58773.101368	12.277	69.4619	-2.5003	0.0017374	281	--	--	--	--	961115829	XM_014925226.1	2.50366e-74	PREDICTED: Octopus bimaculoides cartilage matrix protein-like (LOC106876615), partial mRNA	--	--	--	--	--	--	--	--	--	--	--	--	--	--	--	--	--
Cluster-58773.174508	52.9174	175.662	-1.731	0.0018468	308	--	--	--	--	961127745	XM_014929353.1	2.66086e-104	PREDICTED: Octopus bimaculoides uncharacterized LOC106879678 (LOC106879678), mRNA	--	--	--	--	--	--	--	--	--	--	--	--	--	--	--	--	--
Cluster-58773.174824	440.329	955.441	-1.1176	0.0018543	1167	--	--	--	--	961129558	XM_014929979.1	0	PREDICTED: Octopus bimaculoides uncharacterized LOC106880144 (LOC106880144), mRNA	--	--	--	--	--	--	--	--	--	--	--	--	--	--	--	--	--
Cluster-58773.147288	179.176	1095.14	-2.6117	0.0018929	947	--	--	--	--	961089971	XM_014916156.1	0	PREDICTED: Octopus bimaculoides uncharacterized LOC106870156 (LOC106870156), mRNA	--	--	--	--	--	--	--	PF02289	Cyclohydrolase (MCH)	GO:0006807//GO:0046656//GO:0006730	nitrogen compound metabolic process//folic acid biosynthetic process//one-carbon metabolic process	GO:0018759	methenyltetrahydromethanopterin cyclohydrolase activity	--	--	--	--
Cluster-58773.177601	36.5988	136.978	-1.9041	0.0019473	226	--	--	--	--	961103175	XM_014920706.1	1.4956e-80	PREDICTED: Octopus bimaculoides gamma-interferon-inducible lysosomal thiol reductase-like (LOC106873375), mRNA	--	--	--	--	--	--	--	--	--	--	--	--	--	--	--	--	--
Cluster-58773.180969	0.0001	27.6387	-18.0763	0.0020095	524	--	--	--	--	--	--	--	--	--	--	--	--	--	--	--	--	--	--	--	--	--	--	--	--	--
Cluster-58773.162316	6880.88	16922.7	-1.2983	0.002014	9106	16596797	AAK28276.2	0	hemocyanin G-type [Enteroctopus dofleini]	3132879	AF020548.1	0	Octopus dofleini hemocyanin G-type subunit (Odhcy) mRNA, partial cds	--	--	--	--	O61363	0	Hemocyanin G-type, units Oda to Odg OS=Enteroctopus dofleini GN=ODHCY PE=1 SV=1	PF02796//PF16796//PF00264//PF08655//PF15880//PF05715	Helix-turn-helix domain of resolvase//Microtubule binding//Common central domain of tyrosinase//DASH complex subunit Ask1//NADH dehydrogenase [ubiquinone] flavoprotein 3, mitochondrial//Piccolo Zn-finger	GO:0008608//GO:0008152//GO:0006310	attachment of spindle microtubules to kinetochore//metabolic process//DNA recombination	GO:0003677//GO:0016491//GO:0000150//GO:0046872//GO:0008017	DNA binding//oxidoreductase activity//recombinase activity//metal ion binding//microtubule binding	GO:0042729//GO:0072686//GO:0005747//GO:0005739//GO:0045298//GO:0045202	DASH complex//mitotic spindle//mitochondrial respiratory chain complex I//mitochondrion//tubulin complex//synapse	--	--
Cluster-58773.165018	191.716	604.444	-1.6566	0.0020695	2066	762128891	XP_011447560.1	1.2e-67	PREDICTED: microphthalmia-associated transcription factor-like isoform X3 [Crassostrea gigas]>gi|405970617|gb|EKC35507.1| Microphthalmia-associated transcription factor [Crassostrea gigas]	961070395	XM_014919886.1	0	PREDICTED: Octopus bimaculoides microphthalmia-associated transcription factor-like (LOC106872781), transcript variant X1, mRNA	--	--	--	--	Q08874	2.5e-47	Microphthalmia-associated transcription factor OS=Mus musculus GN=Mitf PE=1 SV=3	PF00010	Helix-loop-helix DNA-binding domain	--	--	GO:0046983	protein dimerization activity	--	--	KOG1318	Helix loop helix transcription factor EB
Cluster-58773.116272	0.0001	38.8009	-18.5657	0.0020958	2130	242014730	XP_002428038.1	2.7e-33	reverse transcriptase, putative [Pediculus humanus corporis]>gi|212512557|gb|EEB15300.1| reverse transcriptase, putative [Pediculus humanus corporis]	--	--	--	--	--	--	--	--	--	--	--	--	--	--	--	--	--	--	--	--	--
Cluster-58773.161096	498.412	1146.88	-1.2023	0.002097	1306	308153226	NP_001183988.1	9.9e-31	hepatic leukemia factor [Danio rerio]>gi|307597923|gb|ADN65972.1| hepatic leukemia factor 2 [Danio rerio]	961104152	XM_014921042.1	0	PREDICTED: Octopus bimaculoides thyrotroph embryonic factor-like (LOC106873604), transcript variant X1, mRNA	K09057	HLF	hepatic leukemia factor	http://www.genome.jp/dbget-bin/www_bget?ko:K09057	Q16534	2e-31	Hepatic leukemia factor OS=Homo sapiens GN=HLF PE=2 SV=1	PF05464//PF07716	Phi-29-like late genes activator (early protein GP4)//Basic region leucine zipper	GO:0006355//GO:0006206//GO:0006351//GO:0006144	regulation of transcription, DNA-templated//pyrimidine nucleobase metabolic process//transcription, DNA-templated//purine nucleobase metabolic process	GO:0003700//GO:0016987//GO:0043565//GO:0003899	transcription factor activity, sequence-specific DNA binding//sigma factor activity//sequence-specific DNA binding//DNA-directed RNA polymerase activity	GO:0005667//GO:0005730	transcription factor complex//nucleolus	KOG3119	Basic region leucine zipper transcription factor
Cluster-58773.141412	221.98	625.876	-1.4954	0.0020973	470	676460331	XP_009055588.1	4.7e-23	hypothetical protein LOTGIDRAFT_228660 [Lottia gigantea]>gi|556105325|gb|ESO93977.1| hypothetical protein LOTGIDRAFT_228660 [Lottia gigantea]	961093128	XM_014917242.1	6.52879e-157	PREDICTED: Octopus bimaculoides kielin/chordin-like protein (LOC106870995), transcript variant X1, mRNA	--	--	--	--	Q9IBG7	3.2e-11	Kielin/chordin-like protein OS=Xenopus laevis GN=kcp PE=2 SV=1	PF05375//PF00093	Pacifastin inhibitor (LCMII)//von Willebrand factor type C domain	--	--	GO:0005515//GO:0030414	protein binding//peptidase inhibitor activity	--	--	--	--
Cluster-58773.160449	0.0001	20.0107	-17.6104	0.0021132	1430	697414076	KGL75101.1	2.6e-16	hypothetical protein N309_08188, partial [Tinamus guttatus]	961084051	XM_014914076.1	1.9541e-22	PREDICTED: Octopus bimaculoides sideroflexin-2-like (LOC106868689), mRNA	--	--	--	--	--	--	--	PF05094	Late expression factor 9 (LEF-9)	GO:0019083	viral transcription	--	--	--	--	--	--
Cluster-58773.134817	196.163	471.23	-1.2644	0.0022046	3933	632944116	XP_007887323.1	6e-31	PREDICTED: NEDD4-binding protein 2 isoform X1 [Callorhinchus milii]	961086498	XM_014914937.1	0	PREDICTED: Octopus bimaculoides NEDD4-binding protein 2-like (LOC106869269), transcript variant X2, mRNA	--	--	--	--	Q3V2Q8	2.3e-30	NEDD4-binding protein 2-like 1 OS=Mus musculus GN=N4bp2l1 PE=2 SV=1	PF01443//PF00448//PF07728//PF06414//PF00437//PF00503//PF01591//PF03266	Viral (Superfamily 1) RNA helicase//SRP54-type protein, GTPase domain//AAA domain (dynein-related subfamily)//Zeta toxin//Type II/IV secretion system protein//G-protein alpha subunit//6-phosphofructo-2-kinase//NTPase	GO:0006000//GO:0007165//GO:0007186//GO:0006614//GO:0006013//GO:0006810	fructose metabolic process//signal transduction//G-protein coupled receptor signaling pathway//SRP-dependent cotranslational protein targeting to membrane//mannose metabolic process//transport	GO:0016301//GO:0019001//GO:0005524//GO:0098519//GO:0003873//GO:0003924//GO:0031683//GO:0005525//GO:0016887//GO:0004871	kinase activity//guanyl nucleotide binding//ATP binding//nucleotide phosphatase activity, acting on free nucleotides//6-phosphofructo-2-kinase activity//GTPase activity//G-protein beta/gamma-subunit complex binding//GTP binding//ATPase activity//signal transducer activity	--	--	--	--
Cluster-58773.125507	1328.88	2541.67	-0.93557	0.0022823	949	343459057	AEM37687.1	7.4e-68	cysteine dioxygenase, partial [Epinephelus bruneus]	961142058	XM_014934326.1	0	PREDICTED: Octopus bimaculoides cysteine dioxygenase type 1-like (LOC106883352), mRNA	--	--	--	--	Q6NWZ9	1.2e-68	Cysteine dioxygenase type 1 OS=Danio rerio GN=cdo1 PE=2 SV=1	PF07847//PF05995	Protein of unknown function (DUF1637)//Cysteine dioxygenase type I	GO:0019530//GO:0006534//GO:0055114//GO:0046439	taurine metabolic process//cysteine metabolic process//oxidation-reduction process//L-cysteine metabolic process	GO:0005506//GO:0017172//GO:0016702	iron ion binding//cysteine dioxygenase activity//oxidoreductase activity, acting on single donors with incorporation of molecular oxygen, incorporation of two atoms of oxygen	--	--	--	--
Cluster-58773.210082	656.021	1464.5	-1.1586	0.0022852	5030	871265999	XP_012944065.1	0	PREDICTED: multidrug resistance-associated protein 1-like [Aplysia californica]	961131846	XM_014930786.1	0	PREDICTED: Octopus bimaculoides multidrug resistance-associated protein 1-like (LOC106880711), mRNA	--	--	--	--	Q5F364	0	Multidrug resistance-associated protein 1 OS=Gallus gallus GN=ABCC1 PE=2 SV=1	PF01926//PF06414//PF03193//PF00664//PF00005	50S ribosome-binding GTPase//Zeta toxin//Protein of unknown function, DUF258//ABC transporter transmembrane region//ABC transporter	GO:0006810//GO:0055085	transport//transmembrane transport	GO:0003924//GO:0016887//GO:0042626//GO:0005524//GO:0005525//GO:0016301	GTPase activity//ATPase activity//ATPase activity, coupled to transmembrane movement of substances//ATP binding//GTP binding//kinase activity	GO:0016021	integral component of membrane	KOG0054	Multidrug resistance-associated protein/mitoxantrone resistance protein, ABC superfamily
Cluster-58773.162263	680.316	2670.7	-1.9729	0.0023733	4255	676433533	XP_009046931.1	9.3e-171	hypothetical protein LOTGIDRAFT_92630, partial [Lottia gigantea]>gi|556113696|gb|ESP02348.1| hypothetical protein LOTGIDRAFT_92630, partial [Lottia gigantea]	961132870	XM_014931142.1	0	PREDICTED: Octopus bimaculoides sphingomyelin phosphodiesterase-like (LOC106880962), mRNA	--	--	--	--	P17405	1.2e-133	Sphingomyelin phosphodiesterase OS=Homo sapiens GN=SMPD1 PE=1 SV=4	PF00149	Calcineurin-like phosphoesterase	--	--	GO:0016787	hydrolase activity	--	--	KOG3770	Acid sphingomyelinase and PHM5 phosphate metabolism protein
Cluster-58773.126689	1225.5	2395.02	-0.96666	0.0023733	519	--	--	--	--	961105461	XR_001409940.1	0	PREDICTED: Octopus bimaculoides uncharacterized LOC106873948 (LOC106873948), ncRNA	--	--	--	--	--	--	--	--	--	--	--	--	--	--	--	--	--
Cluster-58773.21579	4.00315	31.5526	-2.9786	0.00242	635	641649257	XP_008185321.1	1e-33	PREDICTED: uncharacterized protein LOC103310050 [Acyrthosiphon pisum]	961084467	XR_001409337.1	8.42136e-23	PREDICTED: Octopus bimaculoides uncharacterized LOC106868801 (LOC106868801), transcript variant X1, ncRNA	--	--	--	--	--	--	--	PF08142	AARP2CN (NUC121) domain	GO:0042254	ribosome biogenesis	--	--	GO:0005634	nucleus	--	--
Cluster-58773.146123	154.578	607.342	-5.047	0.0024426	596	242022883	XP_002431867.1	1e-11	reverse transcriptase, putative [Pediculus humanus corporis]>gi|212517201|gb|EEB19129.1| reverse transcriptase, putative [Pediculus humanus corporis]	--	--	--	--	--	--	--	--	--	--	--	PF02364//PF07429	1,3-beta-glucan synthase component//4-alpha-L-fucosyltransferase glycosyl transferase group 56	GO:0006771//GO:0016310//GO:0007096//GO:0019497	riboflavin metabolic process//phosphorylation//regulation of exit from mitosis//hexachlorocyclohexane metabolic process	GO:0004673//GO:0003993	protein histidine kinase activity//acid phosphatase activity	GO:0005634//GO:0009365	nucleus//protein histidine kinase complex	--	--
Cluster-58773.203897	0.387352	12.8059	-1.9742	0.0024426	3292	676472641	XP_009059555.1	0	hypothetical protein LOTGIDRAFT_124736, partial [Lottia gigantea]>gi|556101115|gb|ESO89767.1| hypothetical protein LOTGIDRAFT_124736, partial [Lottia gigantea]	961134796	XM_014931815.1	0	PREDICTED: Octopus bimaculoides inositol hexakisphosphate and diphosphoinositol-pentakisphosphate kinase-like (LOC106881428), partial mRNA	--	--	--	--	O43314	0	Inositol hexakisphosphate and diphosphoinositol-pentakisphosphate kinase 2 OS=Homo sapiens GN=PPIP5K2 PE=1 SV=3	PF00328//PF11808//PF06581	Histidine phosphatase superfamily (branch 2)//Domain of unknown function (DUF3329)//Mad1 and Cdc20-bound-Mad2 binding	GO:0009246//GO:0005982//GO:0005985//GO:0036065//GO:0006075	enterobacterial common antigen biosynthetic process//starch metabolic process//sucrose metabolic process//fucosylation//(1->3)-beta-D-glucan biosynthetic process	GO:0003843//GO:0008417	1,3-beta-D-glucan synthase activity//fucosyltransferase activity	GO:0016020//GO:0000148	membrane//1,3-beta-D-glucan synthase complex	KOG1057	Arp2/3 complex-interacting protein VIP1/Asp1, involved in regulation of actin cytoskeleton
Cluster-58773.221134	0.0001	7.81795	-16.2545	0.0024723	1139	--	--	--	--	961122565	XM_014927553.1	0	PREDICTED: Octopus bimaculoides beclin-1-like protein A (LOC106878361), partial mRNA	--	--	--	--	--	--	--	PF07964	Rec10 / Red1	GO:0051598//GO:0007131	meiotic recombination checkpoint//reciprocal meiotic recombination	GO:0005198	structural molecule activity	--	--	--	--
Cluster-58773.142963	0.0001	10.3162	-16.6545	0.0025733	2019	270016074	EFA12522.1	4.6e-11	hypothetical protein TcasGA2_TC003734 [Tribolium castaneum]	--	--	--	--	--	--	--	--	--	--	--	PF03419	Sporulation factor SpoIIGA	GO:0006508//GO:0030436	proteolysis//asexual sporulation	GO:0004190	aspartic-type endopeptidase activity	--	--	--	--
Cluster-58773.179283	61.9919	190.362	-1.6186	0.0026043	500	676460842	XP_009055753.1	2.2e-18	hypothetical protein LOTGIDRAFT_215949 [Lottia gigantea]>gi|556104901|gb|ESO93553.1| hypothetical protein LOTGIDRAFT_215949 [Lottia gigantea]	961123112	XM_014927747.1	0	PREDICTED: Octopus bimaculoides pancreatic triacylglycerol lipase-like (LOC106878519), mRNA	--	--	--	--	--	--	--	PF01477	PLAT/LH2 domain	--	--	GO:0005515	protein binding	--	--	--	--
Cluster-58773.96151	57.8253	174.09	-1.5901	0.0026126	1141	--	--	--	--	961114668	XR_001410210.1	8.15147e-115	PREDICTED: Octopus bimaculoides uncharacterized LOC106876237 (LOC106876237), ncRNA	--	--	--	--	--	--	--	--	--	--	--	--	--	--	--	--	--
Cluster-58773.244188	0.0001	8.51881	-16.3784	0.0026904	7781	602720114	XP_007470216.1	1.1e-41	PREDICTED: putative cell agglutination protein PB2C8.01-like [Lipotes vexillifer]	169757190	CP000949.1	0	Pseudomonas putida W619, complete genome	--	--	--	--	P76108	9.9e-166	Putative ABC transporter periplasmic-binding protein YdcS OS=Escherichia coli (strain K12) GN=ydcS PE=3 SV=1	PF07721//PF02583//PF01627//PF03193//PF13176//PF13414//PF13174//PF00015//PF00004//PF06753//PF01584//PF09177//PF02895//PF00515//PF08241//PF00672//PF00005//PF13181//PF13374//PF01547	Tetratricopeptide repeat//Metal-sensitive transcriptional repressor//Hpt domain//Protein of unknown function, DUF258//Tetratricopeptide repeat//TPR repeat//Tetratricopeptide repeat//Methyl-accepting chemotaxis protein (MCP) signalling domain//ATPase family associated with various cellular activities (AAA)//Bradykinin//CheW-like domain//Syntaxin 6, N-terminal//Signal transducing histidine kinase, …	GO:0006935//GO:0048193//GO:0000160//GO:0016310//GO:0006950//GO:0007165//GO:0008152//GO:0006355//GO:0006810	chemotaxis//Golgi vesicle transport//phosphorelay signal transduction system//phosphorylation//response to stress//signal transduction//metabolic process//regulation of transcription, DNA-templated//transport	GO:0005515//GO:0003677//GO:0005215//GO:0005524//GO:0003924//GO:0005179//GO:0000155//GO:0042802//GO:0005525//GO:0008168//GO:0004673//GO:0016887//GO:0004871//GO:0046872	protein binding//DNA binding//transporter activity//ATP binding//GTPase activity//hormone activity//phosphorelay sensor kinase activity//identical protein binding//GTP binding//methyltransferase activity//protein histidine kinase activity//ATPase activity//signal transducer activity//metal ion binding	GO:0005737//GO:0005576//GO:0016021//GO:0009365//GO:0016020	cytoplasm//extracellular region//integral component of membrane//protein histidine kinase complex//membrane	KOG0055	Multidrug/pheromone exporter, ABC superfamily
Cluster-58773.132688	569.743	1230.58	-1.111	0.0026904	714	--	--	--	--	--	--	--	--	--	--	--	--	--	--	--	--	--	--	--	--	--	--	--	--	--
Cluster-58773.159599	346.339	756.345	-1.1269	0.0027247	1544	--	--	--	--	--	--	--	--	--	--	--	--	--	--	--	PF00229	TNF(Tumour Necrosis Factor) family	GO:0006955//GO:0007165	immune response//signal transduction	GO:0005164	tumor necrosis factor receptor binding	GO:0016020	membrane	--	--
Cluster-58773.182458	151.045	378.6	-1.3257	0.002784	1734	602651983	XP_007432371.1	9.8e-18	PREDICTED: high affinity cationic amino acid transporter 1 [Python bivittatus]	961082678	XM_014913606.1	0	PREDICTED: Octopus bimaculoides high affinity cationic amino acid transporter 1-like (LOC106868381), mRNA	--	--	--	--	Q09143	1.3e-17	High affinity cationic amino acid transporter 1 OS=Mus musculus GN=Slc7a1 PE=1 SV=1	PF14171	Toxin SpoIISA, type II toxin-antitoxin system	GO:0009405	pathogenesis	--	--	GO:0016021	integral component of membrane	KOG1286	Amino acid transporters
Cluster-58773.85387	416.405	910.857	-1.1292	0.0029315	1395	602644799	XP_007428848.1	1.2e-37	PREDICTED: heme oxygenase 1 isoform X2 [Python bivittatus]	961127624	XM_014929309.1	0	PREDICTED: Octopus bimaculoides heme oxygenase 1-like (LOC106879648), mRNA	K00510	HMOX, hmuO, ho	heme oxygenase	http://www.genome.jp/dbget-bin/www_bget?ko:K00510	P23711	1.2e-37	Heme oxygenase 2 OS=Rattus norvegicus GN=Hmox2 PE=1 SV=1	PF01126	Heme oxygenase	GO:0015994//GO:0055114//GO:0006788	chlorophyll metabolic process//oxidation-reduction process//heme oxidation	GO:0004392	heme oxygenase (decyclizing) activity	--	--	--	--
Cluster-58773.202223	40.1734	129.698	-1.6908	0.0029336	598	--	--	--	--	--	--	--	--	--	--	--	--	--	--	--	--	--	--	--	--	--	--	--	--	--
Cluster-58773.134302	1174.94	2242.01	-0.93221	0.002941	3192	762113070	XP_011439282.1	1.3e-201	PREDICTED: cystathionine beta-synthase-like isoform X6 [Crassostrea gigas]	961101185	XM_014920006.1	0	PREDICTED: Octopus bimaculoides cystathionine beta-synthase-like (LOC106872868), mRNA	--	--	--	--	P32232	1.5e-173	Cystathionine beta-synthase OS=Rattus norvegicus GN=Cbs PE=1 SV=3	--	--	--	--	--	--	--	--	KOG1252	Cystathionine beta-synthase and related enzymes
Cluster-58773.125651	14.3624	62.8695	-2.1301	0.0029439	1346	--	--	--	--	961069638	XR_001409621.1	8.48386e-26	PREDICTED: Octopus bimaculoides uncharacterized LOC106871035 (LOC106871035), ncRNA	--	--	--	--	--	--	--	--	--	--	--	--	--	--	--	--	--
Cluster-58773.80451	0.0001	12.0893	-16.8834	0.0029769	1409	762107493	XP_011436352.1	1.9e-80	PREDICTED: protein c-ets-1-B-like isoform X4 [Crassostrea gigas]	961123344	XM_014927826.1	0	PREDICTED: Octopus bimaculoides protein C-ets-1-like (LOC106878581), transcript variant X1, mRNA	--	--	--	--	P13474	7.8e-61	Transforming protein p54/c-ets-1 OS=Gallus gallus GN=ETS1 PE=2 SV=1	PF00447//PF00178	HSF-type DNA-binding//Ets-domain	GO:0006355	regulation of transcription, DNA-templated	GO:0003700//GO:0043565	transcription factor activity, sequence-specific DNA binding//sequence-specific DNA binding	GO:0005634//GO:0005667	nucleus//transcription factor complex	KOG3806	Predicted transcription factor
Cluster-58773.160784	201.947	1407.89	-2.8015	0.002988	2427	159741	AAA16613.1	5.7e-48	omega-crystallin [Enteroctopus dofleini]	961104901	XM_014921310.1	0	PREDICTED: Octopus bimaculoides 70 kDa neurofilament protein-like (LOC106873795), transcript variant X1, mRNA	--	--	--	--	P90901	1.4e-20	Intermediate filament protein ifa-1 OS=Caenorhabditis elegans GN=ifa-1 PE=1 SV=2	PF07926//PF08702//PF08654//PF08912//PF00038//PF04111//PF04136//PF04513//PF06156//PF06160//PF04728//PF06009//PF13851//PF10186	TPR/MLP1/MLP2-like protein//Fibrinogen alpha/beta chain family//DASH complex subunit Dad2//Rho Binding//Intermediate filament protein//Autophagy protein Apg6//Sec34-like family//Baculovirus polyhedron envelope protein, PEP, C terminus//Protein of unknown function (DUF972)//Septation ring formation regulator, EzrA//Lipoprotein leucine-zipper//Laminin Domain II//Growth-arrest specific micro-tubule …	GO:0006886//GO:0007155//GO:0007165//GO:0010508//GO:0006606//GO:0000921//GO:0048870//GO:0030168//GO:0006260//GO:0006914//GO:0007067//GO:0051258	intracellular protein transport//cell adhesion//signal transduction//positive regulation of autophagy//protein import into nucleus//septin ring assembly//cell motility//platelet activation//DNA replication//autophagy//mitotic nuclear division//protein polymerization	GO:0030674//GO:0005102//GO:0005198//GO:0017048	protein binding, bridging//receptor binding//structural molecule activity//Rho GTPase binding	GO:0016020//GO:0005801//GO:0019867//GO:0042729//GO:0005882//GO:0031514//GO:0005940//GO:0072686//GO:0019031//GO:0005577//GO:0019028//GO:0016021	membrane//cis-Golgi network//outer membrane//DASH complex//intermediate filament//motile cilium//septin ring//mitotic spindle//viral envelope//fibrinogen complex//viral capsid//integral component of membrane	--	--
Cluster-58773.157332	1747.57	3334.97	-0.93233	0.0031341	857	--	--	--	--	961082621	XM_014913585.1	0	PREDICTED: Octopus bimaculoides uncharacterized protein DDB_G0272718-like (LOC106868366), mRNA	--	--	--	--	--	--	--	--	--	--	--	--	--	--	--	--	--
Cluster-58773.158522	0.0001	91.1111	-19.7973	0.0031435	2345	676460036	XP_009055492.1	1.6e-100	hypothetical protein LOTGIDRAFT_105182 [Lottia gigantea]>gi|556105218|gb|ESO93870.1| hypothetical protein LOTGIDRAFT_105182 [Lottia gigantea]	961080683	XM_014912924.1	0	PREDICTED: Octopus bimaculoides mitochondrial import receptor subunit TOM70-like (LOC106867870), transcript variant X1, mRNA	--	--	--	--	O94826	4e-94	Mitochondrial import receptor subunit TOM70 OS=Homo sapiens GN=TOMM70 PE=1 SV=1	PF02064//PF13176//PF13414//PF00515//PF13371//PF13181	MAS20 protein import receptor//Tetratricopeptide repeat//TPR repeat//Tetratricopeptide repeat//Tetratricopeptide repeat//Tetratricopeptide repeat	GO:0006886//GO:0006605	intracellular protein transport//protein targeting	GO:0005515	protein binding	GO:0005742	mitochondrial outer membrane translocase complex	KOG0547	Translocase of outer mitochondrial membrane complex, subunit TOM70/TOM72
Cluster-58773.142482	0.0001	60.9455	-19.2172	0.0032248	3764	--	--	--	--	--	--	--	--	--	--	--	--	--	--	--	--	--	--	--	--	--	--	--	--	--
Cluster-58773.90954	4.57753	29.1175	-2.6692	0.0032313	517	--	--	--	--	961104898	XM_014921309.1	8.2148e-67	PREDICTED: Octopus bimaculoides 70 kDa neurofilament protein-like (LOC106873794), mRNA	--	--	--	--	--	--	--	PF00038//PF06156	Intermediate filament protein//Protein of unknown function (DUF972)	GO:0006260	DNA replication	GO:0005198	structural molecule activity	GO:0005882	intermediate filament	--	--
Cluster-58773.108887	7.53682	42.9548	-2.5108	0.0032586	601	260796129	XP_002593057.1	2.4e-56	hypothetical protein BRAFLDRAFT_74384 [Branchiostoma floridae]>gi|229278281|gb|EEN49068.1| hypothetical protein BRAFLDRAFT_74384 [Branchiostoma floridae]	961090747	XM_014916428.1	0	PREDICTED: Octopus bimaculoides hephaestin-like protein (LOC106870385), mRNA	--	--	--	--	B3EWZ9	1.1e-56	Hephaestin-like protein OS=Acropora millepora PE=1 SV=1	PF07731	Multicopper oxidase	GO:0055114	oxidation-reduction process	GO:0016491//GO:0005507	oxidoreductase activity//copper ion binding	--	--	--	--
Cluster-58773.113085	2057	4222.75	-1.0376	0.0032725	1893	675378192	KFM71094.1	9.7e-128	Iron/zinc purple acid phosphatase-like protein, partial [Stegodyphus mimosarum]	961108496	XM_014922547.1	0	PREDICTED: Octopus bimaculoides iron/zinc purple acid phosphatase-like protein (LOC106874717), mRNA	--	--	--	--	A5D6U8	9.6e-115	Acid phosphatase type 7 OS=Danio rerio GN=acp7 PE=2 SV=1	PF00149//PF16656	Calcineurin-like phosphoesterase//Purple acid Phosphatase, N-terminal domain	GO:0006771//GO:0019497	riboflavin metabolic process//hexachlorocyclohexane metabolic process	GO:0016787//GO:0046872//GO:0003993	hydrolase activity//metal ion binding//acid phosphatase activity	--	--	KOG1378	Purple acid phosphatase
Cluster-58773.74268	27.6927	98.7179	-1.8338	0.0032774	642	676481932	XP_009062536.1	5.8e-93	hypothetical protein LOTGIDRAFT_235234 [Lottia gigantea]>gi|556098190|gb|ESO86842.1| hypothetical protein LOTGIDRAFT_235234 [Lottia gigantea]	961074073	XM_014932557.1	0	PREDICTED: Octopus bimaculoides dual oxidase-like (LOC106882005), transcript variant X2, mRNA	--	--	--	--	Q9VQH2	1.9e-67	Dual oxidase OS=Drosophila melanogaster GN=Duox PE=1 SV=2	PF08030//PF08022	Ferric reductase NAD binding domain//FAD-binding domain	GO:0055114	oxidation-reduction process	GO:0016491	oxidoreductase activity	--	--	KOG0039	Ferric reductase, NADH/NADPH oxidase and related proteins
Cluster-58773.233179	71.9438	411.035	-2.5143	0.0033902	501	159741	AAA16613.1	5e-07	omega-crystallin [Enteroctopus dofleini]	961104898	XM_014921309.1	3.59226e-85	PREDICTED: Octopus bimaculoides 70 kDa neurofilament protein-like (LOC106873794), mRNA	--	--	--	--	--	--	--	--	--	--	--	--	--	--	--	--	--
Cluster-58773.172126	9.55554	48.4589	-2.3424	0.0036002	544	821451966	XP_012395977.1	1.2e-11	PREDICTED: B-cell linker protein isoform X2 [Sarcophilus harrisii]	961137221	XR_001410947.1	0	PREDICTED: Octopus bimaculoides uncharacterized LOC106882082 (LOC106882082), ncRNA	--	--	--	--	Q9QUN3	2.2e-11	B-cell linker protein OS=Mus musculus GN=Blnk PE=1 SV=1	PF00010//PF03639	Helix-loop-helix DNA-binding domain//Glycosyl hydrolase family 81	GO:0016998	cell wall macromolecule catabolic process	GO:0052862//GO:0052861//GO:0046983	glucan endo-1,4-beta-glucanase activity, C-3 substituted reducing group//glucan endo-1,3-beta-glucanase activity, C-3 substituted reducing group//protein dimerization activity	--	--	KOG0197	Tyrosine kinases
Cluster-58773.189695	13.4606	67.4997	-2.3261	0.0037332	345	--	--	--	--	--	--	--	--	--	--	--	--	--	--	--	--	--	--	--	--	--	--	--	--	--
Cluster-58773.199039	537.546	1350.72	-1.3293	0.0039555	1943	762090150	XP_011427445.1	5.9e-96	PREDICTED: 17-beta-hydroxysteroid dehydrogenase type 6-like [Crassostrea gigas]	961118544	XM_014926166.1	0	PREDICTED: Octopus bimaculoides retinol dehydrogenase 3-like (LOC106877297), mRNA	--	--	--	--	Q02338	5.9e-51	D-beta-hydroxybutyrate dehydrogenase, mitochondrial OS=Homo sapiens GN=BDH1 PE=1 SV=3	PF08545//PF00106	3-Oxoacyl-[acyl-carrier-protein (ACP)] synthase III//short chain dehydrogenase	GO:0006633//GO:0008152//GO:0042967	fatty acid biosynthetic process//metabolic process//acyl-carrier-protein biosynthetic process	GO:0016491//GO:0004315	oxidoreductase activity//3-oxoacyl-[acyl-carrier-protein] synthase activity	GO:0005835	fatty acid synthase complex	KOG1610	Corticosteroid 11-beta-dehydrogenase and related short chain-type dehydrogenases
Cluster-58773.135696	18.923	77.5922	-2.0358	0.0039681	218	283837550	BAI66447.1	7.2e-11	serine protease 1 [Heterololigo bleekeri]	961139148	XM_014933316.1	8.62809e-78	PREDICTED: Octopus bimaculoides chymotrypsin-1-like (LOC106882587), mRNA	--	--	--	--	--	--	--	--	--	--	--	--	--	--	--	--	--
Cluster-58773.194001	5.75682	33.5525	-2.5431	0.0040329	412	--	--	--	--	--	--	--	--	--	--	--	--	--	--	--	--	--	--	--	--	--	--	--	--	--
Cluster-58773.129167	379.183	805.468	-1.0869	0.0040543	2682	676471528	XP_009059207.1	1.4e-55	hypothetical protein LOTGIDRAFT_192257, partial [Lottia gigantea]>gi|556101480|gb|ESO90132.1| hypothetical protein LOTGIDRAFT_192257, partial [Lottia gigantea]	961074207	XM_014932999.1	0	PREDICTED: Octopus bimaculoides integral membrane protein GPR137B-like (LOC106882348), mRNA	--	--	--	--	O60478	3.1e-50	Integral membrane protein GPR137B OS=Homo sapiens GN=GPR137B PE=2 SV=1	--	--	--	--	--	--	--	--	--	--
Cluster-58773.162318	2004.55	3601.99	-0.84552	0.0040995	1285	52550954	AAU84460.1	8.9e-234	hemocyanin A-type [Enteroctopus dofleini]	3132879	AF020548.1	0	Octopus dofleini hemocyanin G-type subunit (Odhcy) mRNA, partial cds	--	--	--	--	O61363	9.1e-234	Hemocyanin G-type, units Oda to Odg OS=Enteroctopus dofleini GN=ODHCY PE=1 SV=1	PF00264	Common central domain of tyrosinase	GO:0008152	metabolic process	GO:0016491	oxidoreductase activity	--	--	--	--
Cluster-58773.139486	14.1366	64.8004	-2.1966	0.0041286	930	--	--	--	--	--	--	--	--	--	--	--	--	--	--	--	--	--	--	--	--	--	--	--	--	--
Cluster-58773.108882	18.0003	76.6698	-2.0906	0.0041523	695	698395738	XP_009807507.1	2.3e-58	PREDICTED: ceruloplasmin-like, partial [Gavia stellata]	961090747	XM_014916428.1	0	PREDICTED: Octopus bimaculoides hephaestin-like protein (LOC106870385), mRNA	--	--	--	--	Q61147	9.5e-52	Ceruloplasmin OS=Mus musculus GN=Cp PE=1 SV=2	PF07731	Multicopper oxidase	GO:0055114	oxidation-reduction process	GO:0005507//GO:0016491	copper ion binding//oxidoreductase activity	--	--	--	--
Cluster-58773.2383	9.84364	46.8407	-2.2505	0.0042353	547	--	--	--	--	961093750	XM_014917460.1	1.74724e-118	PREDICTED: Octopus bimaculoides uncharacterized LOC106871150 (LOC106871150), partial mRNA	--	--	--	--	--	--	--	PF14991	Protein melan-A	--	--	--	--	GO:0042470	melanosome	--	--
Cluster-58773.163300	14839.8	23487.2	-0.66241	0.0042975	2524	762124495	XP_011445263.1	2.6e-59	PREDICTED: LOW QUALITY PROTEIN: uncharacterized protein LOC105340758 [Crassostrea gigas]	961069528	XM_014916924.1	0	PREDICTED: Octopus bimaculoides prosaposin-like (LOC106870735), transcript variant X2, mRNA	--	--	--	--	P07602	5.5e-25	Prosaposin OS=Homo sapiens GN=PSAP PE=1 SV=2	PF05184	Saposin-like type B, region 1	GO:0006629	lipid metabolic process	--	--	--	--	KOG1340	Prosaposin
Cluster-58773.211176	1024.18	2688.59	-1.3924	0.004431	761	676441940	XP_009049647.1	2.9e-14	hypothetical protein LOTGIDRAFT_238761 [Lottia gigantea]>gi|556111034|gb|ESO99685.1| hypothetical protein LOTGIDRAFT_238761 [Lottia gigantea]	961092052	XM_014916882.1	0	PREDICTED: Octopus bimaculoides thyroglobulin-like (LOC106870714), transcript variant X2, mRNA	--	--	--	--	--	--	--	--	--	--	--	--	--	--	--	--	--
Cluster-58773.155311	4136.69	7040.02	-0.7671	0.004431	1819	617424915	XP_007559813.1	3e-158	PREDICTED: digestive cysteine proteinase 2-like [Poecilia formosa]	961131818	XM_014930776.1	0	PREDICTED: Octopus bimaculoides counting factor associated protein D-like (LOC106880703), partial mRNA	--	--	--	--	Q54TR1	5e-76	Counting factor associated protein D OS=Dictyostelium discoideum GN=cfaD PE=1 SV=1	PF00112//PF03051	Papain family cysteine protease//Peptidase C1-like family	GO:0006508	proteolysis	GO:0004197//GO:0008234	cysteine-type endopeptidase activity//cysteine-type peptidase activity	--	--	KOG1543	Cysteine proteinase Cathepsin L
Cluster-58773.172073	50.9441	154.335	-1.5991	0.004507	540	--	--	--	--	--	--	--	--	--	--	--	--	--	--	--	--	--	--	--	--	--	--	--	--	--
Cluster-58773.47113	10.5634	49.8619	-2.2389	0.0046509	1650	762163156	XP_011419865.1	1.8e-21	PREDICTED: uncharacterized protein LOC105322711 [Crassostrea gigas]>gi|762163158|ref|XP_011419866.1| PREDICTED: uncharacterized protein LOC105322711 [Crassostrea gigas]>gi|762163160|ref|XP_011419867.1| PREDICTED: uncharacterized protein LOC105322711 [Crassostrea gigas]	961127429	XM_014929239.1	0	PREDICTED: Octopus bimaculoides dopamine D2-like receptor (LOC106879598), mRNA	--	--	--	--	Q15760	2e-07	Probable G-protein coupled receptor 19 OS=Homo sapiens GN=GPR19 PE=2 SV=2	PF00001	7 transmembrane receptor (rhodopsin family)	GO:0007186	G-protein coupled receptor signaling pathway	GO:0004930	G-protein coupled receptor activity	GO:0016021	integral component of membrane	KOG3656	FOG: 7 transmembrane receptor
Cluster-58773.126901	19.9307	74.3544	-1.8994	0.0049269	451	542172293	XP_005493991.1	3.4e-07	PREDICTED: chymotrypsin-C-like [Zonotrichia albicollis]	961111759	XM_014923683.1	6.37822e-142	PREDICTED: Octopus bimaculoides serine protease 48-like (LOC106875508), mRNA	--	--	--	--	Q9Y5Q5	5.4e-08	Atrial natriuretic peptide-converting enzyme OS=Homo sapiens GN=CORIN PE=1 SV=2	PF00089	Trypsin	GO:0006508	proteolysis	GO:0004252	serine-type endopeptidase activity	--	--	--	--
Cluster-58773.166812	7.05736	40.6665	-2.5266	0.0050683	1006	--	--	--	--	--	--	--	--	--	--	--	--	--	--	--	--	--	--	--	--	--	--	--	--	--
Cluster-58773.192927	56.1617	167.963	-1.5805	0.0050726	3092	--	--	--	--	--	--	--	--	--	--	--	--	--	--	--	PF02257	RFX DNA-binding domain	GO:0006355	regulation of transcription, DNA-templated	GO:0003677	DNA binding	--	--	--	--
Cluster-58773.174463	323.464	913.9	-1.4984	0.0051424	3438	49899736	AAH76748.1	1.6e-91	LOC445827 protein, partial [Xenopus laevis]	961143501	XM_014934848.1	0	PREDICTED: Octopus bimaculoides histidine--tRNA ligase, cytoplasmic-like (LOC106883735), mRNA	--	--	--	--	Q61035	1e-90	Histidine--tRNA ligase, cytoplasmic OS=Mus musculus GN=Hars PE=1 SV=2	PF00152//PF00749//PF01409//PF00458//PF00587//PF01465	tRNA synthetases class II (D, K and N)//tRNA synthetases class I (E and Q), catalytic domain//tRNA synthetases class II core domain (F)//WHEP-TRS domain//tRNA synthetase class II core domain (G, H, P, S and T)//GRIP domain	GO:0000042//GO:0006418//GO:0043039	protein targeting to Golgi//tRNA aminoacylation for protein translation//tRNA aminoacylation	GO:0004812//GO:0005524//GO:0016876//GO:0000049//GO:0000166//GO:0005515	aminoacyl-tRNA ligase activity//ATP binding//ligase activity, forming aminoacyl-tRNA and related compounds//tRNA binding//nucleotide binding//protein binding	GO:0005737	cytoplasm	KOG1936	Histidyl-tRNA synthetase
Cluster-58773.163813	113.503	284.206	-1.3242	0.0052597	2273	72040359	XP_796397.1	1.6e-12	PREDICTED: diamine acetyltransferase 2 [Strongylocentrotus purpuratus]>gi|780154532|ref|XP_011682181.1| PREDICTED: diamine acetyltransferase 2 [Strongylocentrotus purpuratus]	961108091	XM_014922405.1	0	PREDICTED: Octopus bimaculoides diamine acetyltransferase 2-like (LOC106874616), mRNA	--	--	--	--	Q96F10	6.3e-12	Diamine acetyltransferase 2 OS=Homo sapiens GN=SAT2 PE=1 SV=1	PF13508//PF13673//PF00583	Acetyltransferase (GNAT) domain//Acetyltransferase (GNAT) domain//Acetyltransferase (GNAT) family	GO:0042967	acyl-carrier-protein biosynthetic process	GO:0008080	N-acetyltransferase activity	--	--	--	--
Cluster-58773.250697	49.568	172.202	-1.7966	0.0052665	1082	820128303	KKX05008.1	2.2e-28	interferon regulatory factor 2-like, partial [Scleropages formosus]	961140036	XM_014933621.1	0	PREDICTED: Octopus bimaculoides interferon regulatory factor 2-like (LOC106882833), transcript variant X1, mRNA	--	--	--	--	Q98925	3.3e-27	Interferon regulatory factor 2 OS=Gallus gallus GN=IRF2 PE=2 SV=1	PF00605	Interferon regulatory factor transcription factor	--	--	GO:0000975	regulatory region DNA binding	--	--	--	--
Cluster-124121.0	139.306	355.337	-1.3509	0.0053582	652	--	--	--	--	--	--	--	--	--	--	--	--	--	--	--	--	--	--	--	--	--	--	--	--	--
Cluster-58773.43882	50.8114	155.684	-1.6154	0.0053602	1368	327266900	XP_003218241.1	1.5e-93	PREDICTED: ceruloplasmin [Anolis carolinensis]	961067795	XM_014934643.1	0	PREDICTED: Octopus bimaculoides hephaestin-like (LOC106883555), partial mRNA	--	--	--	--	Q3V1H3	2.3e-86	Hephaestin-like protein 1 OS=Mus musculus GN=Hephl1 PE=2 SV=2	PF06467//PF07732//PF07731	MYM-type Zinc finger with FCS sequence motif//Multicopper oxidase//Multicopper oxidase	GO:0055114	oxidation-reduction process	GO:0008270//GO:0016491//GO:0005507	zinc ion binding//oxidoreductase activity//copper ion binding	--	--	--	--
Cluster-58773.169700	50.5312	504.968	-3.3209	0.0053875	1081	443694096	ELT95313.1	1.3e-12	hypothetical protein CAPTEDRAFT_156850 [Capitella teleta]	961136441	XM_014932376.1	0	PREDICTED: Octopus bimaculoides macrophage migration inhibitory factor-like (LOC106881859), transcript variant X3, mRNA	--	--	--	--	Q76BK2	5.3e-09	Macrophage migration inhibitory factor OS=Xenopus laevis GN=mif PE=1 SV=1	--	--	--	--	--	--	--	--	--	--
Cluster-58773.200192	324.25	722.594	-1.1561	0.0053947	2702	871254192	XP_005105392.2	3.1e-103	PREDICTED: filamin-C-like isoform X1 [Aplysia californica]	961114932	XR_001410241.1	0	PREDICTED: Octopus bimaculoides uncharacterized LOC106876349 (LOC106876349), transcript variant X7, ncRNA	--	--	--	--	Q80X90	1.1e-26	Filamin-B OS=Mus musculus GN=Flnb PE=1 SV=3	PF09446	VMA21-like domain	GO:0070072	vacuolar proton-transporting V-type ATPase complex assembly	--	--	--	--	--	--
Cluster-58773.105260	2598.73	4559.29	-3.3815	0.0054535	361	--	--	--	--	--	--	--	--	--	--	--	--	--	--	--	--	--	GO:0008152	metabolic process	GO:0070569	uridylyltransferase activity	--	--	--	--
Cluster-58773.63729	1.51371	15.7756	-0.811	0.0054535	2203	762098431	XP_011431608.1	3.4e-164	PREDICTED: UDP-N-acetylhexosamine pyrophosphorylase-like isoform X4 [Crassostrea gigas]>gi|405971443|gb|EKC36280.1| UDP-N-acetylhexosamine pyrophosphorylase [Crassostrea gigas]	961072848	XM_014928381.1	0	PREDICTED: Octopus bimaculoides UDP-N-acetylhexosamine pyrophosphorylase-like (LOC106878995), mRNA	K00972	UAP1	UDP-N-acetylglucosamine/UDP-N-acetylgalactosamine diphosphorylase	http://www.genome.jp/dbget-bin/www_bget?ko:K00972	Q91YN5	7.4e-151	UDP-N-acetylhexosamine pyrophosphorylase OS=Mus musculus GN=Uap1 PE=1 SV=1	PF01704	UTP--glucose-1-phosphate uridylyltransferase	--	--	--	--	--	--	KOG2388	UDP-N-acetylglucosamine pyrophosphorylase
Cluster-58773.123795	24.0081	91.2612	-1.9265	0.0054838	2337	2239176	CAA72331.1	1.9e-104	melanogenic peroxidase [Sepia officinalis]	961084155	XM_014914113.1	0	PREDICTED: Octopus bimaculoides myeloperoxidase-like (LOC106868721), mRNA	--	--	--	--	P11247	9.2e-67	Myeloperoxidase OS=Mus musculus GN=Mpo PE=1 SV=2	PF06687//PF00487	SUR7/PalI family//Fatty acid desaturase	GO:0006629	lipid metabolic process	--	--	GO:0005886	plasma membrane	KOG2408	Peroxidase/oxygenase
Cluster-58773.82395	0.0001	103.036	-19.9747	0.0055301	3742	762096297	XP_011430673.1	2e-68	PREDICTED: mitotic checkpoint serine/threonine-protein kinase BUB1-like [Crassostrea gigas]	961068413	XM_014913154.1	0	PREDICTED: Octopus bimaculoides mitotic checkpoint serine/threonine-protein kinase BUB1-like (LOC106868041), transcript variant X1, mRNA	--	--	--	--	O60566	1.1e-56	Mitotic checkpoint serine/threonine-protein kinase BUB1 beta OS=Homo sapiens GN=BUB1B PE=1 SV=3	PF00069//PF05445//PF07714	Protein kinase domain//Poxvirus serine/threonine protein kinase//Protein tyrosine kinase	GO:0006468	protein phosphorylation	GO:0004672//GO:0005524	protein kinase activity//ATP binding	--	--	KOG1166	Mitotic checkpoint serine/threonine protein kinase
Cluster-58773.162301	104.194	266.543	-1.6433	0.0055461	561	16596797	AAK28276.2	3.5e-102	hemocyanin G-type [Enteroctopus dofleini]	16596796	AF338426.3	0	Octopus dofleini hemocyanin G-type gene, partial cds	--	--	--	--	O61363	7.3e-103	Hemocyanin G-type, units Oda to Odg OS=Enteroctopus dofleini GN=ODHCY PE=1 SV=1	PF08655//PF00264	DASH complex subunit Ask1//Common central domain of tyrosinase	--	--	--	--	--	--	--	--
Cluster-58773.165984	49.4142	154.359	-1.3551	0.0055461	984	--	--	--	--	--	--	--	--	--	--	--	--	--	--	--	--	--	GO:0008152//GO:0008608	metabolic process//attachment of spindle microtubules to kinetochore	GO:0016491	oxidoreductase activity	GO:0072686//GO:0042729	mitotic spindle//DASH complex	--	--
Cluster-58773.161174	426.895	977.044	-1.1945	0.0055461	1017	827543933	XP_012544803.1	6e-07	PREDICTED: hepatic leukemia factor isoform X13 [Bombyx mori]	961104152	XM_014921042.1	4.02977e-167	PREDICTED: Octopus bimaculoides thyrotroph embryonic factor-like (LOC106873604), transcript variant X1, mRNA	K09057	HLF	hepatic leukemia factor	http://www.genome.jp/dbget-bin/www_bget?ko:K09057	Q16534	2.1e-07	Hepatic leukemia factor OS=Homo sapiens GN=HLF PE=2 SV=1	PF04147	Nop14-like family	--	--	--	--	GO:0032040	small-subunit processome	--	--
Cluster-58773.76330	6.54194	36.2049	-2.4684	0.0056062	1207	762141282	XP_011453826.1	4.3e-73	PREDICTED: uncharacterized protein LOC105346803 [Crassostrea gigas]	961118913	XM_014926294.1	0	PREDICTED: Octopus bimaculoides mucin-like protein (LOC106877401), mRNA	--	--	--	--	P35555	5.3e-42	Fibrillin-1 OS=Homo sapiens GN=FBN1 PE=1 SV=3	PF00008//PF07645	EGF-like domain//Calcium-binding EGF domain	--	--	GO:0005515//GO:0005509	protein binding//calcium ion binding	--	--	KOG1217	Fibrillins and related proteins containing Ca2+-binding EGF-like domains
Cluster-58773.155409	93.315	244.237	-1.3881	0.0056062	1137	676448511	XP_009051756.1	3.4e-35	hypothetical protein LOTGIDRAFT_103505, partial [Lottia gigantea]>gi|556109264|gb|ESO97916.1| hypothetical protein LOTGIDRAFT_103505, partial [Lottia gigantea]	961137538	XM_014932752.1	0	PREDICTED: Octopus bimaculoides nudix hydrolase 8-like (LOC106882168), transcript variant X3, mRNA	--	--	--	--	Q8L7W2	5.7e-22	Nudix hydrolase 8 OS=Arabidopsis thaliana GN=NUDT8 PE=2 SV=2	PF00293	NUDIX domain	--	--	GO:0016787	hydrolase activity	--	--	KOG0648	Predicted NUDIX hydrolase FGF-2 and related proteins
Cluster-82011.1	0.0001	11.9275	-16.8639	0.0056724	1576	--	--	--	--	--	--	--	--	--	--	--	--	--	--	--	--	--	--	--	--	--	--	--	--	--
Cluster-58773.175410	0.0001	24.3344	-17.8926	0.0056885	2893	762119806	XP_011442818.1	1.1e-74	PREDICTED: etoposide-induced protein 2.4 homolog [Crassostrea gigas]	961134371	XM_014931664.1	0	PREDICTED: Octopus bimaculoides etoposide-induced protein 2.4 homolog (LOC106881319), mRNA	--	--	--	--	O14681	1.1e-66	Etoposide-induced protein 2.4 homolog OS=Homo sapiens GN=EI24 PE=1 SV=4	PF04091	Exocyst complex subunit Sec15-like	GO:0006904	vesicle docking involved in exocytosis	--	--	GO:0000145	exocyst	KOG3966	p53-mediated apoptosis protein EI24/PIG8
Cluster-58773.53873	262.714	598.678	-1.1883	0.0057126	2199	676445733	XP_009050849.1	8.5e-59	hypothetical protein LOTGIDRAFT_174271 [Lottia gigantea]>gi|556109810|gb|ESO98462.1| hypothetical protein LOTGIDRAFT_174271 [Lottia gigantea]	961075702	XM_014935186.1	0	PREDICTED: Octopus bimaculoides lysophosphatidic acid phosphatase type 6-like (LOC106884008), transcript variant X2, mRNA	K14395	ACP6	lysophosphatidic acid phosphatase type 6	http://www.genome.jp/dbget-bin/www_bget?ko:K14395	Q9NPH0	2.1e-52	Lysophosphatidic acid phosphatase type 6 OS=Homo sapiens GN=ACP6 PE=1 SV=2	PF00328	Histidine phosphatase superfamily (branch 2)	GO:0019497//GO:0006771	hexachlorocyclohexane metabolic process//riboflavin metabolic process	GO:0003993	acid phosphatase activity	--	--	KOG3720	Lysosomal & prostatic acid phosphatases
Cluster-58773.91434	8.87832	43.4687	-2.2916	0.0057606	2386	808869398	KKF19440.1	1.6e-18	Zinc finger MYM-type protein 1 [Larimichthys crocea]	--	--	--	--	--	--	--	--	--	--	--	PF05699	hAT family C-terminal dimerisation region	--	--	GO:0046983	protein dimerization activity	--	--	--	--
Cluster-58773.133615	36.3744	156.175	-2.1022	0.0058045	1683	699658620	XP_009898024.1	3.4e-31	PREDICTED: LOW QUALITY PROTEIN: E3 ubiquitin-protein ligase XIAP [Picoides pubescens]	961128670	XM_014929667.1	0	PREDICTED: Octopus bimaculoides E3 ubiquitin-protein ligase XIAP-like (LOC106879915), transcript variant X3, mRNA	--	--	--	--	Q5BKL8	7.9e-28	E3 ubiquitin-protein ligase XIAP OS=Xenopus tropicalis GN=xiap PE=2 SV=1	PF14634	zinc-RING finger domain	--	--	GO:0008270//GO:0005515	zinc ion binding//protein binding	--	--	KOG1100	Predicted E3 ubiquitin ligase
Cluster-58773.180392	0.0001	14.5175	-17.1474	0.0061	1055	--	--	--	--	961135809	XM_014932163.1	1.00038e-93	PREDICTED: Octopus bimaculoides uncharacterized LOC106881697 (LOC106881697), mRNA	--	--	--	--	--	--	--	PF04999	Cell division protein FtsL	GO:0051301//GO:0007049	cell division//cell cycle	--	--	GO:0016021	integral component of membrane	--	--
Cluster-58773.60961	42.0225	137.564	-1.7109	0.0061394	286	762116501	XP_011441088.1	1.1e-14	PREDICTED: collagen alpha-4(VI) chain-like [Crassostrea gigas]	961131012	XM_014930487.1	6.71071e-115	PREDICTED: Octopus bimaculoides cartilage matrix protein-like (LOC106880508), mRNA	--	--	--	--	Q99715	6.5e-07	Collagen alpha-1(XII) chain OS=Homo sapiens GN=COL12A1 PE=1 SV=2	PF13676	TIR domain	GO:0007165	signal transduction	GO:0005515	protein binding	--	--	--	--
Cluster-120980.0	4.32609	29.0536	-2.7476	0.0062845	1374	676454866	XP_009053820.1	2.6e-29	hypothetical protein LOTGIDRAFT_160424 [Lottia gigantea]>gi|556106652|gb|ESO95304.1| hypothetical protein LOTGIDRAFT_160424 [Lottia gigantea]	961140799	XM_014933892.1	0	PREDICTED: Octopus bimaculoides UPF0764 protein C16orf89 homolog (LOC106883033), mRNA	--	--	--	--	Q3UST5	4.2e-11	UPF0764 protein C16orf89 homolog OS=Mus musculus PE=2 SV=2	--	--	--	--	--	--	--	--	--	--
Cluster-58773.84082	0.0001	19.4261	-17.5676	0.006332	3019	762157732	XP_011417029.1	2.4e-64	PREDICTED: autophagy-related protein 16-1-like [Crassostrea gigas]>gi|762157734|ref|XP_011417030.1| PREDICTED: autophagy-related protein 16-1-like [Crassostrea gigas]>gi|762157736|ref|XP_011417031.1| PREDICTED: autophagy-related protein 16-1-like [Crassostrea gigas]	961139293	XM_014933366.1	0	PREDICTED: Octopus bimaculoides autophagy-related protein 16-1-like (LOC106882625), transcript variant X2, mRNA	K17890	ATG16L	autophagy-related protein 16, animal type	http://www.genome.jp/dbget-bin/www_bget?ko:K17890	Q8C0J2	3.2e-27	Autophagy-related protein 16-1 OS=Mus musculus GN=Atg16l1 PE=1 SV=1	PF07716//PF08496//PF15233//PF01166//PF05837//PF07851//PF06005//PF03938//PF00400	Basic region leucine zipper//Peptidase family S49 N-terminal//Synaptonemal complex central element protein 1//TSC-22/dip/bun family//Centromere protein H (CENP-H)//TMPIT-like protein//Protein of unknown function (DUF904)//Outer membrane protein (OmpH-like)//WD domain, G-beta repeat	GO:0070193//GO:0006355//GO:0007128//GO:0007130//GO:0043093//GO:0051382//GO:0000917	synaptonemal complex organization//regulation of transcription, DNA-templated//meiotic prophase I//synaptonemal complex assembly//FtsZ-dependent cytokinesis//kinetochore assembly//barrier septum assembly	GO:0043565//GO:0005515//GO:0004252//GO:0003700//GO:0051082	sequence-specific DNA binding//protein binding//serine-type endopeptidase activity//transcription factor activity, sequence-specific DNA binding//unfolded protein binding	GO:0016021//GO:0005667//GO:0005737//GO:0000795//GO:0005886//GO:0000776	integral component of membrane//transcription factor complex//cytoplasm//synaptonemal complex//plasma membrane//kinetochore	KOG0288	WD40 repeat protein TipD
Cluster-58773.162033	5.11863	88.2992	-4.1086	0.0064652	527	--	--	--	--	961136212	XM_014932300.1	0	PREDICTED: Octopus bimaculoides histone H3.3 (LOC106881791), mRNA	--	--	--	--	--	--	--	--	--	--	--	--	--	--	--	--	--
Cluster-58773.138408	8487.31	13607.5	-0.68102	0.0064652	2128	762099362	XP_011432103.1	1.8e-98	PREDICTED: syntenin-1-like [Crassostrea gigas]>gi|762099364|ref|XP_011432104.1| PREDICTED: syntenin-1-like [Crassostrea gigas]	961088020	XM_014915479.1	0	PREDICTED: Octopus bimaculoides syntenin-1-like (LOC106869660), mRNA	--	--	--	--	O08992	7.6e-84	Syntenin-1 OS=Mus musculus GN=Sdcbp PE=1 SV=1	PF00595//PF13180	PDZ domain (Also known as DHR or GLGF)//PDZ domain	--	--	GO:0005515	protein binding	--	--	KOG3605	Beta amyloid precursor-binding protein
Cluster-58773.138039	51.0981	159.195	-1.6395	0.0065543	403	--	--	--	--	961092097	XM_014916897.1	6.07609e-92	PREDICTED: Octopus bimaculoides uncharacterized LOC106870726 (LOC106870726), mRNA	--	--	--	--	--	--	--	--	--	--	--	--	--	--	--	--	--
Cluster-58773.117106	1.90652	19.1285	-3.3267	0.0067364	1500	871257689	XP_012942508.1	5.9e-88	PREDICTED: SH2B adapter protein 2-like [Aplysia californica]	961095867	XM_014918203.1	0	PREDICTED: Octopus bimaculoides uncharacterized LOC106871628 (LOC106871628), mRNA	--	--	--	--	Q9JID9	2.4e-52	SH2B adapter protein 2 OS=Mus musculus GN=Sh2b2 PE=1 SV=2	PF06112	Gammaherpesvirus capsid protein	--	--	--	--	GO:0019028	viral capsid	--	--
Cluster-58773.119416	103.826	283.404	-1.4487	0.0067456	426	--	--	--	--	--	--	--	--	--	--	--	--	--	--	--	PF00031	Cystatin domain	--	--	GO:0004869	cysteine-type endopeptidase inhibitor activity	--	--	--	--
Cluster-58773.199038	13.0337	110.732	-3.0867	0.0068221	1308	762090150	XP_011427445.1	2.9e-91	PREDICTED: 17-beta-hydroxysteroid dehydrogenase type 6-like [Crassostrea gigas]	961118544	XM_014926166.1	0	PREDICTED: Octopus bimaculoides retinol dehydrogenase 3-like (LOC106877297), mRNA	--	--	--	--	Q02338	7.8e-47	D-beta-hydroxybutyrate dehydrogenase, mitochondrial OS=Homo sapiens GN=BDH1 PE=1 SV=3	PF00106	short chain dehydrogenase	GO:0008152	metabolic process	GO:0016491	oxidoreductase activity	--	--	KOG1610	Corticosteroid 11-beta-dehydrogenase and related short chain-type dehydrogenases
Cluster-58773.132320	12.676	55.6597	-2.1345	0.0068221	1920	762126587	XP_011446354.1	2.4e-190	PREDICTED: inactive phospholipase C-like protein 2 [Crassostrea gigas]	961131256	XM_014930574.1	0	PREDICTED: Octopus bimaculoides inactive phospholipase C-like protein 1 (LOC106880573), mRNA	--	--	--	--	Q15111	2.7e-157	Inactive phospholipase C-like protein 1 OS=Homo sapiens GN=PLCL1 PE=1 SV=3	PF00387//PF06072//PF00168	Phosphatidylinositol-specific phospholipase C, Y domain//Alphaherpesvirus tegument protein US9//C2 domain	GO:0046339//GO:0035556//GO:0009395//GO:0006629//GO:0007165	diacylglycerol metabolic process//intracellular signal transduction//phospholipid catabolic process//lipid metabolic process//signal transduction	GO:0004435//GO:0005515	phosphatidylinositol phospholipase C activity//protein binding	GO:0019033	viral tegument	KOG0169	Phosphoinositide-specific phospholipase C
Cluster-58773.168083	149.855	354.564	-1.2425	0.0068502	2803	676480523	XP_009062087.1	1.2e-129	hypothetical protein LOTGIDRAFT_229291 [Lottia gigantea]>gi|556098484|gb|ESO87136.1| hypothetical protein LOTGIDRAFT_229291 [Lottia gigantea]	961133810	XM_014931465.1	0	PREDICTED: Octopus bimaculoides unconventional myosin-XV-like (LOC106881175), partial mRNA	--	--	--	--	Q9UKN7	1.7e-59	Unconventional myosin-XV OS=Homo sapiens GN=MYO15A PE=1 SV=2	PF00784	MyTH4 domain	--	--	--	--	GO:0005856	cytoskeleton	KOG4229	Myosin VII, myosin IXB and related myosins
Cluster-58773.171964	167.831	402.545	-1.2621	0.0070308	721	762078689	XP_011455272.1	3.4e-09	PREDICTED: putative cytochrome P450 CYP13A8 [Crassostrea gigas]>gi|762078691|ref|XP_011455279.1| PREDICTED: putative cytochrome P450 CYP13A8 [Crassostrea gigas]>gi|762078693|ref|XP_011455289.1| PREDICTED: putative cytochrome P450 CYP13A8 [Crassostrea gigas]	961084563	XM_014914254.1	1.78342e-129	PREDICTED: Octopus bimaculoides cytochrome P450 3A31-like (LOC106868827), transcript variant X1, mRNA	--	--	--	--	Q29496	5.1e-08	Cytochrome P450 3A24 OS=Ovis aries GN=CYP3A24 PE=2 SV=1	PF00067	Cytochrome P450	GO:0055114	oxidation-reduction process	GO:0016705//GO:0020037//GO:0005506	oxidoreductase activity, acting on paired donors, with incorporation or reduction of molecular oxygen//heme binding//iron ion binding	--	--	--	--
Cluster-58773.182378	75.0764	216.647	-1.5289	0.0070502	804	817200378	XP_012275903.1	3.1e-59	PREDICTED: papilin isoform X4 [Orussus abietinus]	961101403	XM_014920084.1	0	PREDICTED: Octopus bimaculoides papilin-like (LOC106872908), mRNA	--	--	--	--	Q868Z9	3.9e-57	Papilin OS=Drosophila melanogaster GN=Ppn PE=1 SV=2	PF05986	ADAM-TS Spacer 1	--	--	GO:0004222	metalloendopeptidase activity	GO:0031012	extracellular matrix	KOG3538	Disintegrin metalloproteinases with thrombospondin repeats
Cluster-58773.159013	30.6222	184.767	-20.1052	0.0070842	1261	--	--	--	--	961122752	XM_014927619.1	0	PREDICTED: Octopus bimaculoides uncharacterized LOC106878411 (LOC106878411), mRNA	--	--	--	--	--	--	--	PF01786	Alternative oxidase	--	--	--	--	--	--	--	--
Cluster-58773.203694	0.0001	112.786	-2.5931	0.0070842	528	--	--	--	--	--	--	--	--	--	--	--	--	--	--	--	--	--	GO:0055114//GO:0006118	oxidation-reduction process//obsolete electron transport	GO:0009916	alternative oxidase activity	--	--	--	--
Cluster-58773.135300	15.9793	65.4757	-4.8238	0.0074091	668	--	--	--	--	--	--	--	--	--	--	--	--	--	--	--	--	--	GO:0006826//GO:0034755//GO:0055085	iron ion transport//iron ion transmembrane transport//transmembrane transport	GO:0005381	iron ion transmembrane transporter activity	GO:0016021	integral component of membrane	--	--
Cluster-58773.66408	0.351138	9.94471	-2.0348	0.0074091	1942	524874474	XP_005093972.1	2.6e-120	PREDICTED: solute carrier family 40 member 1-like [Aplysia californica]	961109704	XM_014922962.1	0	PREDICTED: Octopus bimaculoides solute carrier family 40 member 1-like (LOC106875014), transcript variant X1, mRNA	--	--	--	--	Q9I9R3	2.2e-106	Solute carrier family 40 member 1 OS=Danio rerio GN=slc40a1 PE=2 SV=2	PF07690//PF06963	Major Facilitator Superfamily//Ferroportin1 (FPN1)	--	--	--	--	--	--	--	--
Cluster-58773.153403	779.143	1537.08	-0.98023	0.0075017	786	449667614	XP_002166962.2	1.9e-98	PREDICTED: cathepsin B-like [Hydra vulgaris]	961104293	XM_014921091.1	0	PREDICTED: Octopus bimaculoides cathepsin B-like (LOC106873643), transcript variant X2, mRNA	--	--	--	--	P00787	7.6e-90	Cathepsin B OS=Rattus norvegicus GN=Ctsb PE=1 SV=2	PF03051//PF00112	Peptidase C1-like family//Papain family cysteine protease	GO:0006508	proteolysis	GO:0004197//GO:0008234	cysteine-type endopeptidase activity//cysteine-type peptidase activity	--	--	KOG1543	Cysteine proteinase Cathepsin L
Cluster-58773.119178	398.1	833.856	-2.1762	0.007569	688	--	--	--	--	961111996	XR_001410138.1	1.49068e-40	PREDICTED: Octopus bimaculoides uncharacterized LOC106875557 (LOC106875557), ncRNA	--	--	--	--	--	--	--	--	--	GO:0008152	metabolic process	GO:0016491	oxidoreductase activity	--	--	--	--
Cluster-58773.162313	13.5107	61.0634	-1.0667	0.007569	784	16596797	AAK28276.2	4.7e-137	hemocyanin G-type [Enteroctopus dofleini]	159738	M57288.1	0	Octopus dofleini hemocyanin precursor, mRNA, partial cds	--	--	--	--	P12659	1.7e-137	Hemocyanin A-type, units Ode to Odg (Fragment) OS=Enteroctopus dofleini PE=2 SV=2	PF00264	Common central domain of tyrosinase	--	--	--	--	--	--	--	--
Cluster-58773.233446	2.69934	21.2829	-2.979	0.0075865	819	871269463	XP_012944736.1	2.7e-18	PREDICTED: uncharacterized protein LOC106013459 [Aplysia californica]	--	--	--	--	--	--	--	--	--	--	--	--	--	--	--	--	--	--	--	--	--
Cluster-58773.190894	1.34088	18.5115	-3.7872	0.0076057	8835	358341466	GAA49140.1	3.3e-45	transposon Ty3-G gap-Pol polyprotein [Clonorchis sinensis]	961135630	XM_014932107.1	3.23601e-62	PREDICTED: Octopus bimaculoides ras-related GTP-binding protein C-like (LOC106881646), mRNA	--	--	--	--	P04323	4.8e-23	Retrovirus-related Pol polyprotein from transposon 17.6 OS=Drosophila melanogaster GN=pol PE=3 SV=1	PF05434//PF05784//PF02723//PF07353	TMEM9//Betaherpesvirus UL82/83 protein N terminus//Non-structural protein NS3/Small envelope protein E//Uroplakin II	GO:0061024//GO:0009405	membrane organization//pathogenesis	--	--	GO:0030176//GO:0016020//GO:0016021	integral component of endoplasmic reticulum membrane//membrane//integral component of membrane	KOG0017	FOG: Transposon-encoded proteins with TYA, reverse transcriptase, integrase domains in various combinations
Cluster-58773.122972	440.106	985.747	-1.1634	0.0078651	3639	762079826	XP_011413823.1	6.5e-56	PREDICTED: calumenin-like isoform X1 [Crassostrea gigas]	961086382	XM_014914897.1	0	PREDICTED: Octopus bimaculoides calumenin-A-like (LOC106869242), transcript variant X3, mRNA	--	--	--	--	B5X4E0	1.2e-44	Calumenin-B OS=Salmo salar GN=calub PE=2 SV=1	PF13499//PF13202//PF13833//PF00036//PF13405//PF10591	EF-hand domain pair//EF hand//EF-hand domain pair//EF hand//EF-hand domain//Secreted protein acidic and rich in cysteine Ca binding region	GO:0007165	signal transduction	GO:0005509	calcium ion binding	GO:0005578	proteinaceous extracellular matrix	KOG4223	Reticulocalbin, calumenin, DNA supercoiling factor, and related Ca2+-binding proteins of the CREC family (EF-Hand protein superfamily)
Cluster-125629.2	0.0001	21.0335	-17.6823	0.007921	1835	676431566	XP_009046294.1	4.6e-74	hypothetical protein LOTGIDRAFT_111029 [Lottia gigantea]>gi|556114172|gb|ESP02824.1| hypothetical protein LOTGIDRAFT_111029 [Lottia gigantea]	961138546	XM_014933102.1	0	PREDICTED: Octopus bimaculoides cytochrome P450 26A1-like (LOC106882427), transcript variant X2, mRNA	K07437	CYP26A	cytochrome P450, family 26, subfamily A	http://www.genome.jp/dbget-bin/www_bget?ko:K07437	Q08D50	3.8e-68	Cytochrome P450 26B1 OS=Xenopus tropicalis GN=cyp26b1 PE=2 SV=1	PF00067	Cytochrome P450	GO:0055114	oxidation-reduction process	GO:0005506//GO:0016705//GO:0020037	iron ion binding//oxidoreductase activity, acting on paired donors, with incorporation or reduction of molecular oxygen//heme binding	--	--	KOG0157	Cytochrome P450 CYP4/CYP19/CYP26 subfamilies
Cluster-58773.71125	404.16	869.898	-1.1059	0.0079768	1841	871245287	XP_005102442.2	1.7e-36	PREDICTED: sulfotransferase 6B1-like, partial [Aplysia californica]	961076043	XM_014935302.1	0	PREDICTED: Octopus bimaculoides estrogen sulfotransferase-like (LOC106884083), mRNA	--	--	--	--	P19217	7.1e-30	Estrogen sulfotransferase OS=Bos taurus GN=SULT1E1 PE=1 SV=1	PF00685	Sulfotransferase domain	--	--	GO:0008146	sulfotransferase activity	--	--	KOG1584	Sulfotransferase
Cluster-58773.201129	26.3443	163.365	-2.6325	0.0079878	4004	471233079	XP_004037588.1	5.2e-14	hypothetical protein IMG5_048190 [Ichthyophthirius multifiliis]>gi|340507677|gb|EGR33602.1| hypothetical protein IMG5_048190 [Ichthyophthirius multifiliis]	961120979	XM_014926999.1	0	PREDICTED: Octopus bimaculoides uncharacterized LOC106877925 (LOC106877925), partial mRNA	--	--	--	--	--	--	--	--	--	--	--	--	--	--	--	--	--
Cluster-58773.107974	156.482	385	-1.2989	0.0080642	2978	762115195	XP_011440403.1	4.5e-39	PREDICTED: uncharacterized protein LOC105337393 [Crassostrea gigas]	961080509	XM_014912862.1	0	PREDICTED: Octopus bimaculoides uncharacterized LOC106867833 (LOC106867833), transcript variant X2, mRNA	--	--	--	--	--	--	--	--	--	--	--	--	--	--	--	--	--
Cluster-58773.233566	0.387352	9.98955	-4.6887	0.0081854	1368	675876830	XP_009023975.1	5e-33	hypothetical protein HELRODRAFT_177552 [Helobdella robusta]>gi|555694668|gb|ESN97900.1| hypothetical protein HELRODRAFT_177552 [Helobdella robusta]	961074073	XM_014932557.1	3.45932e-129	PREDICTED: Octopus bimaculoides dual oxidase-like (LOC106882005), transcript variant X2, mRNA	--	--	--	--	--	--	--	PF00064//PF02234//PF01529	Neuraminidase//Cyclin-dependent kinase inhibitor//DHHC palmitoyltransferase	GO:0045859//GO:0005975//GO:0006687//GO:0007050	regulation of protein kinase activity//carbohydrate metabolic process//glycosphingolipid metabolic process//cell cycle arrest	GO:0008270//GO:0004861//GO:0004308	zinc ion binding//cyclin-dependent protein serine/threonine kinase inhibitor activity//exo-alpha-sialidase activity	GO:0005634//GO:0055036//GO:0016020//GO:0033644	nucleus//virion membrane//membrane//host cell membrane	--	--
Cluster-58773.13946	205.532	459.315	-1.1601	0.0084573	2010	260800011	XP_002594930.1	2.6e-211	hypothetical protein BRAFLDRAFT_209115 [Branchiostoma floridae]>gi|229280168|gb|EEN50941.1| hypothetical protein BRAFLDRAFT_209115 [Branchiostoma floridae]	961069694	XM_014917497.1	0	PREDICTED: Octopus bimaculoides histidine ammonia-lyase-like (LOC106871166), mRNA	--	--	--	--	P42357	4.8e-205	Histidine ammonia-lyase OS=Homo sapiens GN=HAL PE=1 SV=1	--	--	GO:0019556//GO:0006547//GO:0009058//GO:0019557	histidine catabolic process to glutamate and formamide//histidine metabolic process//biosynthetic process//histidine catabolic process to glutamate and formate	GO:0004397	histidine ammonia-lyase activity	GO:0005737	cytoplasm	KOG0222	Phenylalanine and histidine ammonia-lyase
Cluster-58773.126616	23.5294	82.9093	-1.8171	0.0084846	1651	--	--	--	--	--	--	--	--	--	--	--	--	--	--	--	--	--	--	--	--	--	--	--	--	--
Cluster-58773.184496	1107	3824.03	-1.7884	0.0085282	2093	4433546	AAD20808.1	2.6e-222	5-aminolevulinate synthase [Sepia officinalis]	961118225	XM_014926059.1	0	PREDICTED: Octopus bimaculoides 5-aminolevulinate synthase, erythroid-specific, mitochondrial-like (LOC106877209), transcript variant X1, mRNA	K00643	E2.3.1.37, ALAS	5-aminolevulinate synthase	http://www.genome.jp/dbget-bin/www_bget?ko:K00643	P07997	3.2e-159	5-aminolevulinate synthase, nonspecific, mitochondrial OS=Gallus gallus GN=ALAS1 PE=2 SV=2	PF00155//PF09029//PF01053//PF01212	Aminotransferase class I and II//5-aminolevulinate synthase presequence//Cys/Met metabolism PLP-dependent enzyme//Beta-eliminating lyase	GO:0006778//GO:0009058//GO:0006563//GO:0006520//GO:0006566//GO:0006544//GO:0042967//GO:0006783	porphyrin-containing compound metabolic process//biosynthetic process//L-serine metabolic process//cellular amino acid metabolic process//threonine metabolic process//glycine metabolic process//acyl-carrier-protein biosynthetic process//heme biosynthetic process	GO:0030170//GO:0003870//GO:0016829	pyridoxal phosphate binding//5-aminolevulinate synthase activity//lyase activity	GO:0005759	mitochondrial matrix	KOG1360	5-aminolevulinate synthase
Cluster-58773.82964	0.387352	9.68383	-4.6439	0.0087339	466	762155901	XP_011416064.1	2.8e-36	PREDICTED: uncharacterized protein LOC105320008 [Crassostrea gigas]	961135012	XM_014931892.1	0	PREDICTED: Octopus bimaculoides putative tyrosinase-like protein tyr-3 (LOC106867111), partial mRNA	--	--	--	--	Q19673	1.7e-17	Putative tyrosinase-like protein tyr-3 OS=Caenorhabditis elegans GN=tyr-3 PE=3 SV=5	PF00264	Common central domain of tyrosinase	GO:0008152	metabolic process	GO:0016491	oxidoreductase activity	--	--	--	--
Cluster-58773.170040	200.306	511.645	-1.3529	0.0088111	2776	--	--	--	--	--	--	--	--	--	--	--	--	--	--	--	--	--	--	--	--	--	--	--	--	--
Cluster-58773.143480	58.1721	328.413	-2.7027	0.0089596	445	524886695	XP_005099940.1	2.8e-41	PREDICTED: uncharacterized protein LOC101860820 [Aplysia californica]	961111510	XM_014923595.1	3.662e-164	PREDICTED: Octopus bimaculoides phosphonoacetaldehyde hydrolase-like (LOC106875443), mRNA	--	--	--	--	A0LMC1	3.5e-23	Phosphonoacetaldehyde hydrolase OS=Syntrophobacter fumaroxidans (strain DSM 10017 / MPOB) GN=phnX PE=3 SV=1	--	--	--	--	--	--	--	--	--	--
Cluster-58773.163684	4.05081	26.3714	-2.4971	0.0089596	516	675877310	XP_009024215.1	2.6e-19	hypothetical protein HELRODRAFT_193192 [Helobdella robusta]>gi|555694527|gb|ESN97759.1| hypothetical protein HELRODRAFT_193192 [Helobdella robusta]	961089962	XM_014916152.1	1.60718e-133	PREDICTED: Octopus bimaculoides collagen alpha-1(XIV) chain-like (LOC106870153), partial mRNA	--	--	--	--	O35701	4.8e-08	Matrilin-3 OS=Mus musculus GN=Matn3 PE=1 SV=2	--	--	--	--	--	--	--	--	--	--
Cluster-58773.150174	3351.78	5924.74	-0.82182	0.0089625	1159	524881845	XP_005097572.1	1.2e-06	PREDICTED: ganglioside GM2 activator-like [Aplysia californica]>gi|524881847|ref|XP_005097573.1| PREDICTED: ganglioside GM2 activator-like [Aplysia californica]	961140536	XM_014933799.1	2.17656e-155	PREDICTED: Octopus bimaculoides ganglioside GM2 activator-like (LOC106882953), mRNA	--	--	--	--	--	--	--	--	--	--	--	--	--	--	--	--	--
Cluster-58773.91548	70.2397	369.529	-2.3953	0.0091798	707	--	--	--	--	--	--	--	--	--	--	--	--	--	--	--	--	--	--	--	--	--	--	--	--	--
Cluster-58773.211622	219.003	524.883	-1.261	0.0092291	1971	762170026	XP_011423431.1	1.4e-65	PREDICTED: transcription factor ETV7-like isoform X4 [Crassostrea gigas]	961086388	XM_014914899.1	0	PREDICTED: Octopus bimaculoides ETS-related transcription factor Elf-1-like (LOC106869245), mRNA	--	--	--	--	Q0VC65	2.4e-28	Transcription factor ETV6 OS=Bos taurus GN=ETV6 PE=2 SV=1	PF00178//PF02198//PF05026	Ets-domain//Sterile alpha motif (SAM)/Pointed domain//Dcp2, box A domain	GO:0006355	regulation of transcription, DNA-templated	GO:0043565//GO:0030145//GO:0003700//GO:0003723//GO:0016787	sequence-specific DNA binding//manganese ion binding//transcription factor activity, sequence-specific DNA binding//RNA binding//hydrolase activity	GO:0005634//GO:0005667	nucleus//transcription factor complex	KOG3804	Transcription factor NERF and related proteins, contain ETS domain
Cluster-58773.161175	32.6132	104.803	-1.6842	0.0092401	2882	759134073	XP_011363314.1	3.8e-06	PREDICTED: hepatic leukemia factor isoform X2 [Pteropus vampyrus]	961104155	XM_014921043.1	0	PREDICTED: Octopus bimaculoides thyrotroph embryonic factor-like (LOC106873604), transcript variant X2, mRNA	--	--	--	--	Q16534	5.9e-07	Hepatic leukemia factor OS=Homo sapiens GN=HLF PE=2 SV=1	PF17123	RING-like zinc finger	--	--	GO:0005515//GO:0008270	protein binding//zinc ion binding	--	--	--	--
Cluster-58773.178188	26.2545	93.9148	-1.8388	0.0094391	277	--	--	--	--	--	--	--	--	--	--	--	--	--	--	--	--	--	--	--	--	--	--	--	--	--
Cluster-58773.84429	139.801	480.848	-1.7822	0.0094717	5101	847132402	XP_012819335.1	8.8e-91	PREDICTED: mucin-like protein [Xenopus (Silurana) tropicalis]	961139243	XM_014933350.1	0	PREDICTED: Octopus bimaculoides mucin-like protein (LOC106882610), partial mRNA	--	--	--	--	O60688	5.9e-58	Protein yippee-like 1 OS=Homo sapiens GN=YPEL1 PE=3 SV=1	PF11606//PF07645//PF00008//PF01333//PF06119	Family 31 carbohydrate binding protein//Calcium-binding EGF domain//EGF-like domain//Apocytochrome F, C-terminal//Nidogen-like	GO:0015979//GO:0007160//GO:0006118	photosynthesis//cell-matrix adhesion//obsolete electron transport	GO:0009055//GO:0005509//GO:0005506//GO:0033905//GO:0005515//GO:0020037	electron carrier activity//calcium ion binding//iron ion binding//xylan endo-1,3-beta-xylosidase activity//protein binding//heme binding	GO:0031361	integral component of thylakoid membrane	KOG3399	Predicted Yippee-type zinc-binding protein
Cluster-58773.62878	4.30527	26.4933	-2.6215	0.0096234	1616	734643112	XP_010750523.1	8.5e-16	PREDICTED: LOW QUALITY PROTEIN: zinc finger MYM-type protein 1-like, partial [Larimichthys crocea]	--	--	--	--	--	--	--	--	--	--	--	--	--	--	--	--	--	--	--	--	--
Cluster-58773.163340	337.714	949.897	-1.492	0.0097699	5792	676489771	XP_009065048.1	0	hypothetical protein LOTGIDRAFT_229502 [Lottia gigantea]>gi|556095265|gb|ESO83918.1| hypothetical protein LOTGIDRAFT_229502 [Lottia gigantea]	961112901	XM_014924075.1	0	PREDICTED: Octopus bimaculoides ATP-binding cassette sub-family A member 3-like (LOC106875803), mRNA	--	--	--	--	Q99758	0	ATP-binding cassette sub-family A member 3 OS=Homo sapiens GN=ABCA3 PE=1 SV=2	PF00448//PF04310//PF00005//PF13304//PF06414//PF03193	SRP54-type protein, GTPase domain//MukB N-terminal//ABC transporter//AAA domain, putative AbiEii toxin, Type IV TA system//Zeta toxin//Protein of unknown function, DUF258	GO:0007059//GO:0006614//GO:0030261	chromosome segregation//SRP-dependent cotranslational protein targeting to membrane//chromosome condensation	GO:0016301//GO:0003677//GO:0005524//GO:0005525//GO:0003924//GO:0016887	kinase activity//DNA binding//ATP binding//GTP binding//GTPase activity//ATPase activity	GO:0009295	nucleoid	KOG0059	Lipid exporter ABCA1 and related proteins, ABC superfamily
Cluster-58773.177997	1.35573	15.9429	-3.5558	0.0099229	1493	762169612	XP_011423214.1	3e-63	PREDICTED: FYVE and coiled-coil domain-containing protein 1-like isoform X1 [Crassostrea gigas]	961098106	XM_014918993.1	0	PREDICTED: Octopus bimaculoides FYVE and coiled-coil domain-containing protein 1-like (LOC106872124), transcript variant X3, mRNA	--	--	--	--	Q8VDC1	1.1e-52	FYVE and coiled-coil domain-containing protein 1 OS=Mus musculus GN=Fyco1 PE=1 SV=1	PF00769//PF07926//PF00992//PF02183//PF01496//PF02601	Ezrin/radixin/moesin family//TPR/MLP1/MLP2-like protein//Troponin//Homeobox associated leucine zipper//V-type ATPase 116kDa subunit family//Exonuclease VII, large subunit	GO:0006308//GO:0006355//GO:0006606//GO:0015991//GO:0015992	DNA catabolic process//regulation of transcription, DNA-templated//protein import into nucleus//ATP hydrolysis coupled proton transport//proton transport	GO:0003700//GO:0015078//GO:0043565//GO:0008092//GO:0008855	transcription factor activity, sequence-specific DNA binding//hydrogen ion transmembrane transporter activity//sequence-specific DNA binding//cytoskeletal protein binding//exodeoxyribonuclease VII activity	GO:0019898//GO:0009318//GO:0005667//GO:0033179//GO:0005861//GO:0005737	extrinsic component of membrane//exodeoxyribonuclease VII complex//transcription factor complex//proton-transporting V-type ATPase, V0 domain//troponin complex//cytoplasm	--	--
Cluster-40118.2	68.1477	219.665	-1.6886	0.010006	915	762105981	XP_011435569.1	3.8e-21	PREDICTED: suppressor of cytokine signaling 2-like [Crassostrea gigas]	961100855	XM_014919885.1	0	PREDICTED: Octopus bimaculoides suppressor of cytokine signaling 2-like (LOC106872783), mRNA	--	--	--	--	Q9PW70	4.8e-11	Cytokine-inducible SH2-containing protein OS=Gallus gallus GN=CISH PE=2 SV=1	PF07525	SOCS box	GO:0035556	intracellular signal transduction	--	--	--	--	--	--
Cluster-58773.162578	513.971	1025.24	-0.9962	0.010037	725	--	--	--	--	961135497	XM_014932064.1	0	PREDICTED: Octopus bimaculoides putative transmembrane protein DDB_G0267530 (LOC106881601), partial mRNA	--	--	--	--	--	--	--	PF04505	Interferon-induced transmembrane protein	GO:0009607	response to biotic stimulus	--	--	GO:0016021	integral component of membrane	--	--
Cluster-58773.98600	14.5576	77.8452	-2.4188	0.010072	587	260823930	XP_002606921.1	2.3e-27	hypothetical protein BRAFLDRAFT_60336 [Branchiostoma floridae]>gi|229292266|gb|EEN62931.1| hypothetical protein BRAFLDRAFT_60336 [Branchiostoma floridae]	961121792	XM_014927279.1	0	PREDICTED: Octopus bimaculoides methylmalonic aciduria and homocystinuria type C protein homolog (LOC106878149), mRNA	K14618	MMACHC	methylmalonic aciduria homocystinuria type C protein	http://www.genome.jp/dbget-bin/www_bget?ko:K14618	Q9Y4U1	8.6e-22	Methylmalonic aciduria and homocystinuria type C protein OS=Homo sapiens GN=MMACHC PE=1 SV=3	--	--	--	--	--	--	--	--	--	--
Cluster-58773.33884	67.2147	190.71	-1.5045	0.010072	2035	762099323	XP_011432083.1	1.4e-39	PREDICTED: putative ferric-chelate reductase 1 isoform X4 [Crassostrea gigas]	961130309	XM_014930239.1	0	PREDICTED: Octopus bimaculoides putative ferric-chelate reductase 1 (LOC106880355), mRNA	--	--	--	--	Q6INU7	4.5e-17	Putative ferric-chelate reductase 1 OS=Xenopus laevis GN=frrs1 PE=2 SV=1	PF03188	Eukaryotic cytochrome b561	--	--	--	--	GO:0016021	integral component of membrane	--	--
Cluster-58773.155406	139.713	338.971	-1.2787	0.010146	1085	676456311	XP_009054283.1	3.2e-11	hypothetical protein LOTGIDRAFT_232192 [Lottia gigantea]>gi|556106438|gb|ESO95090.1| hypothetical protein LOTGIDRAFT_232192 [Lottia gigantea]	--	--	--	--	--	--	--	--	Q9W1A4	3.2e-06	Protein tamozhennic OS=Drosophila melanogaster GN=tamo PE=1 SV=1	--	--	--	--	--	--	--	--	--	--
Cluster-58773.56295	0.0001	82.1509	-19.6479	0.010191	1517	443695434	ELT96345.1	1.1e-25	hypothetical protein CAPTEDRAFT_168421 [Capitella teleta]	961095962	XM_014918234.1	0	PREDICTED: Octopus bimaculoides transmembrane protein 256 homolog (LOC106871650), mRNA	--	--	--	--	A4K526	1.4e-18	Transmembrane protein 256 homolog OS=Bufo gargarizans PE=3 SV=1	--	--	--	--	--	--	--	--	KOG3472	Predicted small membrane protein
Cluster-58773.181887	14.1805	57.0622	-2.0086	0.010194	1140	762116184	XP_011440915.1	7.8e-24	PREDICTED: acidic phospholipase A2-like [Crassostrea gigas]	961071950	XM_014925368.1	0	PREDICTED: Octopus bimaculoides basic phospholipase A2 Ts-G6D49-like (LOC106876697), transcript variant X2, mRNA	--	--	--	--	C1JAR9	2.6e-22	Phospholipase A2 Scol/Pla OS=Scolopendra viridis PE=1 SV=1	PF08398//PF06951	Parvovirus coat protein VP1//Group XII secretory phospholipase A2 precursor (PLA2G12)	GO:0009395//GO:0016042	phospholipid catabolic process//lipid catabolic process	GO:0004623//GO:0005198//GO:0005509	phospholipase A2 activity//structural molecule activity//calcium ion binding	GO:0005576//GO:0019028	extracellular region//viral capsid	KOG4087	Phospholipase A2
Cluster-58773.143317	2088.12	3625.29	-0.79589	0.010574	769	--	--	--	--	961117667	XR_001410331.1	4.10102e-131	PREDICTED: Octopus bimaculoides uncharacterized LOC106877073 (LOC106877073), ncRNA	--	--	--	--	--	--	--	--	--	--	--	--	--	--	--	--	--
Cluster-58773.176770	185.215	428.422	-1.2098	0.01062	1093	395502464	XP_003755600.1	5.5e-59	PREDICTED: retinaldehyde-binding protein 1 [Sarcophilus harrisii]	961089098	XM_014915854.1	0	PREDICTED: Octopus bimaculoides retinaldehyde-binding protein 1-like (LOC106869923), mRNA	--	--	--	--	Q9Z275	3.9e-52	Retinaldehyde-binding protein 1 OS=Mus musculus GN=Rlbp1 PE=1 SV=3	--	--	--	--	--	--	--	--	KOG1471	Phosphatidylinositol transfer protein SEC14 and related proteins
Cluster-58773.147659	58.5778	163.12	-1.4775	0.010747	1030	242014730	XP_002428038.1	2e-39	reverse transcriptase, putative [Pediculus humanus corporis]>gi|212512557|gb|EEB15300.1| reverse transcriptase, putative [Pediculus humanus corporis]	--	--	--	--	--	--	--	--	--	--	--	--	--	--	--	--	--	--	--	--	--
Cluster-58773.161319	104.968	265.532	-1.3389	0.010756	497	762075747	XP_011443926.1	1.5e-19	PREDICTED: NADP-dependent malic enzyme-like [Crassostrea gigas]	961068206	XM_014912447.1	0	PREDICTED: Octopus bimaculoides NADP-dependent malic enzyme-like (LOC106867538), transcript variant X2, mRNA	--	--	--	--	Q16798	1e-15	NADP-dependent malic enzyme, mitochondrial OS=Homo sapiens GN=ME3 PE=2 SV=2	--	--	--	--	--	--	--	--	KOG1257	NADP+-dependent malic enzyme
Cluster-58773.166187	849.916	1765.15	-1.0544	0.010942	1664	762151426	XP_011413697.1	2.8e-187	PREDICTED: V-type proton ATPase subunit H-like isoform X2 [Crassostrea gigas]	961109615	XM_014922933.1	0	PREDICTED: Octopus bimaculoides V-type proton ATPase subunit H-like (LOC106874994), transcript variant X2, mRNA	--	--	--	--	Q9V3J1	3.4e-156	V-type proton ATPase subunit H OS=Drosophila melanogaster GN=VhaSFD PE=2 SV=2	PF11698//PF02985	V-ATPase subunit H//HEAT repeat	GO:0015991	ATP hydrolysis coupled proton transport	GO:0005515//GO:0016820	protein binding//hydrolase activity, acting on acid anhydrides, catalyzing transmembrane movement of substances	GO:0000221	vacuolar proton-transporting V-type ATPase, V1 domain	KOG2759	Vacuolar H+-ATPase V1 sector, subunit H
Cluster-58773.191905	0.0001	8.16389	-17.3615	0.011084	2662	762131606	XP_011448975.1	5.5e-44	PREDICTED: coiled-coil domain-containing protein 33-like isoform X1 [Crassostrea gigas]>gi|762131608|ref|XP_011448976.1| PREDICTED: coiled-coil domain-containing protein 33-like isoform X1 [Crassostrea gigas]>gi|762131610|ref|XP_011448977.1| PREDICTED: coiled-coil domain-containing protein 33-like isoform X1 [Crassostrea gigas]	961071969	XM_014925431.1	0	PREDICTED: Octopus bimaculoides coiled-coil domain-containing protein 33-like (LOC106876740), mRNA	K04570	BCL2L1, bcl-xL	BCL2-like 1 (apoptosis regulator Bcl-X)	http://www.genome.jp/dbget-bin/www_bget?ko:K04570	Q07816	2.3e-29	Bcl-2-like protein 1 OS=Gallus gallus GN=BCL2L1 PE=2 SV=2	PF10541//PF00657//PF00452//PF02180//PF05524	Nuclear envelope localisation domain//GDSL-like Lipase/Acylhydrolase//Apoptosis regulator proteins, Bcl-2 family//Bcl-2 homology region 4//PEP-utilising enzyme, N-terminal	--	--	--	--	--	--	KOG0613	Projectin/twitchin and related proteins
Cluster-58773.68129	0.0001	16.8391	-16.317	0.011084	1707	--	--	--	--	--	--	--	--	--	--	--	--	--	--	--	--	--	GO:0042981//GO:0009401	regulation of apoptotic process//phosphoenolpyruvate-dependent sugar phosphotransferase system	GO:0016788	hydrolase activity, acting on ester bonds	GO:0016021	integral component of membrane	--	--
Cluster-58773.172072	50.2206	144.653	-1.5262	0.011336	469	--	--	--	--	--	--	--	--	--	--	--	--	--	--	--	--	--	--	--	--	--	--	--	--	--
Cluster-58773.130042	10.7063	49.4083	-18.0669	0.011385	1505	--	--	--	--	961114650	XM_014924709.1	0	PREDICTED: Octopus bimaculoides glycoprotein 3-alpha-L-fucosyltransferase A-like (LOC106876232), transcript variant X3, mRNA	--	--	--	--	--	--	--	PF01287	Eukaryotic elongation factor 5A hypusine, DNA-binding OB fold	GO:0007049	cell cycle	--	--	GO:0017053	transcriptional repressor complex	--	--
Cluster-58773.169876	0.0001	27.459	-2.2063	0.011385	1245	--	--	--	--	961072881	XM_014928511.1	2.23959e-06	PREDICTED: Octopus bimaculoides uncharacterized LOC106879077 (LOC106879077), mRNA	--	--	--	--	--	--	--	PF15306	LIN37	GO:0045905//GO:0006452//GO:0006448//GO:0045901	positive regulation of translational termination//translational frameshifting//regulation of translational elongation//positive regulation of translational elongation	GO:0003723//GO:0003746//GO:0043022	RNA binding//translation elongation factor activity//ribosome binding	GO:0005840	ribosome	--	--
Cluster-95478.3	0.0001	29.5929	-18.1749	0.011442	3475	443720346	ELU10144.1	3.3e-142	hypothetical protein CAPTEDRAFT_93073, partial [Capitella teleta]	961100353	XM_014919708.1	0	PREDICTED: Octopus bimaculoides integrin beta-3-like (LOC106872647), transcript variant X1, mRNA	--	--	--	--	Q27874	7.2e-116	Integrin beta pat-3 OS=Caenorhabditis elegans GN=pat-3 PE=1 SV=1	--	--	--	--	--	--	--	--	KOG1226	Integrin beta subunit (N-terminal portion of extracellular region)
Cluster-58773.143322	17929.5	30992.4	-0.78958	0.011515	1065	--	--	--	--	961117667	XR_001410331.1	5.74523e-131	PREDICTED: Octopus bimaculoides uncharacterized LOC106877073 (LOC106877073), ncRNA	--	--	--	--	--	--	--	--	--	--	--	--	--	--	--	--	--
Cluster-58773.136391	956.237	1832.86	-0.93865	0.011572	2591	762168568	XP_011422663.1	1.5e-110	PREDICTED: nose resistant to fluoxetine protein 6-like [Crassostrea gigas]	--	--	--	--	--	--	--	--	Q09225	6.4e-69	Nose resistant to fluoxetine protein 6 OS=Caenorhabditis elegans GN=nrf-6 PE=1 SV=3	PF01757//PF02740//PF15461	Acyltransferase family//Colipase, C-terminal domain//Beta-carotene 15,15'-dioxygenase	GO:0007586//GO:0016042//GO:0055114	digestion//lipid catabolic process//oxidation-reduction process	GO:0016747//GO:0016702//GO:0008047	transferase activity, transferring acyl groups other than amino-acyl groups//oxidoreductase activity, acting on single donors with incorporation of molecular oxygen, incorporation of two atoms of oxygen//enzyme activator activity	GO:0005576	extracellular region	--	--
Cluster-58773.200126	0.511863	11.291	-4.4633	0.011673	428	--	--	--	--	--	--	--	--	--	--	--	--	--	--	--	--	--	--	--	--	--	--	--	--	--
Cluster-58773.162319	84699.9	131218	-0.63153	0.011861	8917	16596797	AAK28276.2	0	hemocyanin G-type [Enteroctopus dofleini]	3132879	AF020548.1	0	Octopus dofleini hemocyanin G-type subunit (Odhcy) mRNA, partial cds	--	--	--	--	O61363	0	Hemocyanin G-type, units Oda to Odg OS=Enteroctopus dofleini GN=ODHCY PE=1 SV=1	PF05715//PF16796//PF02796//PF15880//PF08655//PF00264	Piccolo Zn-finger//Microtubule binding//Helix-turn-helix domain of resolvase//NADH dehydrogenase [ubiquinone] flavoprotein 3, mitochondrial//DASH complex subunit Ask1//Common central domain of tyrosinase	GO:0008608//GO:0008152//GO:0006310	attachment of spindle microtubules to kinetochore//metabolic process//DNA recombination	GO:0003677//GO:0016491//GO:0000150//GO:0046872//GO:0008017	DNA binding//oxidoreductase activity//recombinase activity//metal ion binding//microtubule binding	GO:0072686//GO:0042729//GO:0005747//GO:0005739//GO:0045298//GO:0045202	mitotic spindle//DASH complex//mitochondrial respiratory chain complex I//mitochondrion//tubulin complex//synapse	--	--
Cluster-58773.187779	0.0001	31.7198	-18.275	0.012216	5433	15420402	AAK97374.1	8.6e-36	circadian clock protein period [Bulla gouldiana]	961112416	XM_014923906.1	0	PREDICTED: Octopus bimaculoides serine-rich adhesin for platelets-like (LOC106875667), mRNA	--	--	--	--	Q25637	4e-28	Period circadian protein OS=Periplaneta americana GN=per PE=2 SV=2	PF08447//PF00989	PAS fold//PAS fold	GO:0006355	regulation of transcription, DNA-templated	GO:0005515	protein binding	--	--	KOG3753	Circadian clock protein period
Cluster-38442.2	27.8022	95.3923	-1.7787	0.012223	1047	762145605	XP_011456079.1	9.7e-37	PREDICTED: ETS-related transcription factor Elf-3-like isoform X4 [Crassostrea gigas]	961079298	XM_014912435.1	0	PREDICTED: Octopus bimaculoides ETS homologous factor-like (LOC106867537), transcript variant X1, mRNA	K17101	ELF5	E74-like factor 5	http://www.genome.jp/dbget-bin/www_bget?ko:K17101	Q58DT0	3.2e-19	ETS-related transcription factor Elf-5 OS=Bos taurus GN=ELF5 PE=2 SV=1	PF00178	Ets-domain	GO:0006355	regulation of transcription, DNA-templated	GO:0043565//GO:0003700	sequence-specific DNA binding//transcription factor activity, sequence-specific DNA binding	GO:0005667	transcription factor complex	KOG3804	Transcription factor NERF and related proteins, contain ETS domain
Cluster-58773.149298	215.886	473.15	-1.132	0.01249	899	--	--	--	--	--	--	--	--	--	--	--	--	--	--	--	--	--	--	--	--	--	--	--	--	--
Cluster-58773.179285	4.26548	31.2743	-2.8742	0.012506	1738	762133864	XP_011450146.1	7.2e-69	PREDICTED: pancreatic triacylglycerol lipase-like [Crassostrea gigas]	961123112	XM_014927747.1	0	PREDICTED: Octopus bimaculoides pancreatic triacylglycerol lipase-like (LOC106878519), mRNA	--	--	--	--	P27657	1.3e-46	Pancreatic triacylglycerol lipase OS=Rattus norvegicus GN=Pnlip PE=1 SV=1	PF01477//PF09472	PLAT/LH2 domain//Tetrahydromethanopterin S-methyltransferase, F subunit (MtrF)	GO:0046656//GO:0015948	folic acid biosynthetic process//methanogenesis	GO:0005515//GO:0030269	protein binding//tetrahydromethanopterin S-methyltransferase activity	GO:0016020	membrane	--	--
Cluster-58773.46485	469.097	966.8	-1.0433	0.012709	921	--	--	--	--	961124190	XR_001410549.1	1.36634e-136	PREDICTED: Octopus bimaculoides uncharacterized LOC106878786 (LOC106878786), ncRNA	--	--	--	--	--	--	--	PF06083	Interleukin-17	GO:0006954//GO:0007165	inflammatory response//signal transduction	GO:0005125	cytokine activity	GO:0005576	extracellular region	--	--
Cluster-58773.56131	11.2516	49.6132	-2.1406	0.012743	522	--	--	--	--	961123565	XM_014927906.1	0	PREDICTED: Octopus bimaculoides uncharacterized LOC106878628 (LOC106878628), mRNA	--	--	--	--	--	--	--	--	--	--	--	--	--	--	--	--	--
Cluster-58773.60130	7.93629	41.2587	-2.3782	0.01285	711	762093168	XP_011429034.1	5.2e-34	PREDICTED: ankyrin repeat domain-containing protein 54-like [Crassostrea gigas]	961119911	XM_014926637.1	0	PREDICTED: Octopus bimaculoides ankyrin repeat domain-containing protein 54-like (LOC106877690), mRNA	--	--	--	--	Q1LZC5	1.6e-30	Ankyrin repeat domain-containing protein 54 OS=Bos taurus GN=ANKRD54 PE=2 SV=1	PF00023//PF13606	Ankyrin repeat//Ankyrin repeat	--	--	GO:0005515	protein binding	--	--	KOG0504	FOG: Ankyrin repeat
Cluster-58773.211731	1.16752	40.9436	-5.1321	0.012882	698	--	--	--	--	--	--	--	--	--	--	--	--	--	--	--	--	--	--	--	--	--	--	--	--	--
Cluster-58773.194890	611.539	1206.47	-0.98028	0.012882	2514	224471526	BAH24057.1	1.3e-100	Cyp3A-like isoform 1 [Mytilus edulis]	961132049	XM_014930857.1	0	PREDICTED: Octopus bimaculoides cytochrome P450 3A8-like (LOC106880759), mRNA	--	--	--	--	Q64417	6.4e-90	Cytochrome P450 3A14 OS=Cavia porcellus GN=CYP3A14 PE=2 SV=2	PF00067//PF05652	Cytochrome P450//Scavenger mRNA decapping enzyme (DcpS) N-terminal	GO:0000290//GO:0055114	deadenylation-dependent decapping of nuclear-transcribed mRNA//oxidation-reduction process	GO:0016705//GO:0020037//GO:0005506//GO:0016787	oxidoreductase activity, acting on paired donors, with incorporation or reduction of molecular oxygen//heme binding//iron ion binding//hydrolase activity	--	--	KOG0158	Cytochrome P450 CYP3/CYP5/CYP6/CYP9 subfamilies
Cluster-58773.131648	14.8008	60.3703	-2.0282	0.012924	3972	748373107	KIH54222.1	4.3e-85	hypothetical protein ANCDUO_15633 [Ancylostoma duodenale]	961134386	XM_014931669.1	8.59322e-70	PREDICTED: Octopus bimaculoides zinc finger protein 729-like (LOC106881324), mRNA	--	--	--	--	--	--	--	--	--	--	--	--	--	--	--	--	--
Cluster-58773.127221	66.0526	180.587	-1.451	0.013256	1050	676460157	XP_009055532.1	4e-59	hypothetical protein LOTGIDRAFT_209446 [Lottia gigantea]>gi|556105261|gb|ESO93913.1| hypothetical protein LOTGIDRAFT_209446 [Lottia gigantea]	961128807	XM_014929716.1	0	PREDICTED: Octopus bimaculoides zinc metalloproteinase nas-15-like (LOC106879956), mRNA	--	--	--	--	P55115	3.8e-44	Zinc metalloproteinase nas-15 OS=Caenorhabditis elegans GN=nas-15 PE=2 SV=2	PF01400//PF00413	Astacin (Peptidase family M12A)//Matrixin	GO:0006508	proteolysis	GO:0004222//GO:0008270	metalloendopeptidase activity//zinc ion binding	GO:0031012	extracellular matrix	KOG3714	Meprin A metalloprotease
Cluster-58773.21553	0.0001	6.42306	-15.971	0.01336	2300	--	--	--	--	--	--	--	--	--	--	--	--	--	--	--	PF16851	Stomagen	GO:2000123	positive regulation of stomatal complex development	--	--	--	--	--	--
Cluster-58773.132077	55.9117	174.549	-1.6424	0.013387	1216	557026740	XP_006013482.1	2.6e-102	PREDICTED: inositol oxygenase [Latimeria chalumnae]	961089521	XM_014915996.1	0	PREDICTED: Octopus bimaculoides inositol oxygenase-like (LOC106870030), mRNA	K00469	MIOX	inositol oxygenase	http://www.genome.jp/dbget-bin/www_bget?ko:K00469	Q5REY9	1.5e-100	Inositol oxygenase OS=Pongo abelii GN=MIOX PE=2 SV=1	PF05153	Myo-inositol oxygenase	GO:0055114//GO:0019310	oxidation-reduction process//inositol catabolic process	GO:0050113//GO:0005506	inositol oxygenase activity//iron ion binding	GO:0005737	cytoplasm	--	--
Cluster-58773.54983	7.88589	37.8069	-2.2613	0.013616	2220	443683921	ELT88002.1	3.1e-101	hypothetical protein CAPTEDRAFT_178036 [Capitella teleta]	961090795	XM_014916445.1	0	PREDICTED: Octopus bimaculoides carnitine O-palmitoyltransferase 1, liver isoform-like (LOC106870396), transcript variant X3, mRNA	--	--	--	--	P32198	4.6e-92	Carnitine O-palmitoyltransferase 1, liver isoform OS=Rattus norvegicus GN=Cpt1a PE=1 SV=2	PF00755	Choline/Carnitine o-acyltransferase	--	--	GO:0016746	transferase activity, transferring acyl groups	--	--	KOG3716	Carnitine O-acyltransferase CPTI
Cluster-58773.199704	0.376422	8.63197	-4.5193	0.013653	849	562816234	AHB34936.1	5.8e-133	heat shock protein 70 [Octopus vulgaris]	562816233	KF195923.1	0	Octopus vulgaris heat shock protein 70 (HSP70) mRNA, complete cds	K03283	HSPA1_8	heat shock 70kDa protein 1/8	http://www.genome.jp/dbget-bin/www_bget?ko:K03283	O97125	2.9e-111	Heat shock protein 68 OS=Drosophila melanogaster GN=Hsp68 PE=1 SV=1	PF05699//PF12019//PF02782//PF06723//PF01968	hAT family C-terminal dimerisation region//Type II transport protein GspH//FGGY family of carbohydrate kinases, C-terminal domain//MreB/Mbl protein//Hydantoinase/oxoprolinase	GO:0000902//GO:0015628//GO:0015031//GO:0005975	cell morphogenesis//protein secretion by the type II secretion system//protein transport//carbohydrate metabolic process	GO:0016787//GO:0008565//GO:0016773//GO:0046983	hydrolase activity//protein transporter activity//phosphotransferase activity, alcohol group as acceptor//protein dimerization activity	GO:0015627	type II protein secretion system complex	KOG0101	Molecular chaperones HSP70/HSC70, HSP70 superfamily
Cluster-58773.36615	132.682	317.052	-1.2567	0.01396	2083	545537497	XP_005633971.1	1.4e-66	PREDICTED: laccase domain-containing protein 1 isoform X1 [Canis lupus familiaris]>gi|545537499|ref|XP_005633972.1| PREDICTED: laccase domain-containing protein 1 isoform X2 [Canis lupus familiaris]>gi|545537501|ref|XP_005633973.1| PREDICTED: laccase domain-containing protein 1 isoform X3 [Canis lupus familiaris]	961081730	XM_014913281.1	0	PREDICTED: Octopus bimaculoides laccase domain-containing protein 1-like (LOC106868149), transcript variant X1, mRNA	--	--	--	--	Q8BZT9	1.7e-64	Laccase domain-containing protein 1 OS=Mus musculus GN=Lacc1 PE=1 SV=1	--	--	--	--	--	--	--	--	--	--
Cluster-58773.98971	0.0001	6.82141	-16.0578	0.014074	679	--	--	--	--	--	--	--	--	--	--	--	--	--	--	--	--	--	--	--	--	--	--	--	--	--
Cluster-58773.234491	5.63213	72.2393	-3.681	0.014143	468	557863081	ESS66391.1	2.1e-07	hypothetical protein TCDM_05017 [Trypanosoma cruzi Dm28c]	--	--	--	--	--	--	--	--	--	--	--	--	--	--	--	--	--	--	--	--	--
Cluster-58773.162317	53.1202	152.15	-1.5182	0.014264	563	52550954	AAU84460.1	6e-94	hemocyanin A-type [Enteroctopus dofleini]	961113147	XM_014924161.1	0	PREDICTED: Octopus bimaculoides hemocyanin G-type, units Oda to Odg-like (LOC106875859), partial mRNA	--	--	--	--	O61363	2.8e-94	Hemocyanin G-type, units Oda to Odg OS=Enteroctopus dofleini GN=ODHCY PE=1 SV=1	PF00264	Common central domain of tyrosinase	GO:0008152	metabolic process	GO:0016491	oxidoreductase activity	--	--	--	--
Cluster-46403.2	42.6666	138.719	-1.701	0.014324	1449	762163156	XP_011419865.1	1.9e-22	PREDICTED: uncharacterized protein LOC105322711 [Crassostrea gigas]>gi|762163158|ref|XP_011419866.1| PREDICTED: uncharacterized protein LOC105322711 [Crassostrea gigas]>gi|762163160|ref|XP_011419867.1| PREDICTED: uncharacterized protein LOC105322711 [Crassostrea gigas]	961088106	XM_014915508.1	0	PREDICTED: Octopus bimaculoides alpha-2Da adrenergic receptor-like (LOC106869681), transcript variant X1, mRNA	--	--	--	--	P70031	2.7e-08	Cholecystokinin receptor OS=Xenopus laevis GN=cckar PE=2 SV=1	PF00001//PF13748	7 transmembrane receptor (rhodopsin family)//ABC transporter transmembrane region	GO:0006810//GO:0007186//GO:0055085	transport//G-protein coupled receptor signaling pathway//transmembrane transport	GO:0004930//GO:0005524//GO:0042626	G-protein coupled receptor activity//ATP binding//ATPase activity, coupled to transmembrane movement of substances	GO:0016021	integral component of membrane	KOG3656	FOG: 7 transmembrane receptor
Cluster-123777.1	0.0001	22.8882	-17.8042	0.01451	5856	260795091	XP_002592540.1	3.6e-24	hypothetical protein BRAFLDRAFT_69057 [Branchiostoma floridae]>gi|229277760|gb|EEN48551.1| hypothetical protein BRAFLDRAFT_69057 [Branchiostoma floridae]	961074620	XM_014934362.1	0	PREDICTED: Octopus bimaculoides uncharacterized LOC106883370 (LOC106883370), mRNA	--	--	--	--	--	--	--	PF00595//PF12125	PDZ domain (Also known as DHR or GLGF)//D domain of beta-TrCP	--	--	GO:0046983//GO:0005515	protein dimerization activity//protein binding	--	--	--	--
Cluster-58773.159373	1119.82	2142.65	-0.93613	0.014522	1693	--	--	--	--	--	--	--	--	--	--	--	--	--	--	--	--	--	--	--	--	--	--	--	--	--
Cluster-58773.248622	41.8609	124.306	-2.4915	0.014575	696	795063748	XP_011873781.1	2.4e-07	PREDICTED: histone-lysine N-methyltransferase SETMAR-like [Vollenhovia emeryi]	--	--	--	--	--	--	--	--	--	--	--	PF00558	Vpu protein	--	--	GO:0008375	acetylglucosaminyltransferase activity	GO:0016020	membrane	--	--
Cluster-58773.96036	8.24917	46.3901	-1.5702	0.014575	2508	762111226	XP_011438322.1	2.1e-109	PREDICTED: beta-1,3-galactosyl-O-glycosyl-glycoprotein beta-1,6-N-acetylglucosaminyltransferase 3-like [Crassostrea gigas]>gi|762111228|ref|XP_011438323.1| PREDICTED: beta-1,3-galactosyl-O-glycosyl-glycoprotein beta-1,6-N-acetylglucosaminyltransferase 3-like [Crassostrea gigas]>gi|405973242|gb|EKC37966.1| Beta-1,3-galactosyl-O-glycosyl-glycoprotein beta-1,6-N-acetylglucosaminyltransferase 3 [Cras…	961138661	XM_014933143.1	0	PREDICTED: Octopus bimaculoides beta-1,3-galactosyl-O-glycosyl-glycoprotein beta-1,6-N-acetylglucosaminyltransferase 3-like (LOC106882458), mRNA	--	--	--	--	O95395	1.1e-65	Beta-1,3-galactosyl-O-glycosyl-glycoprotein beta-1,6-N-acetylglucosaminyltransferase 3 OS=Homo sapiens GN=GCNT3 PE=2 SV=1	PF02485	Core-2/I-Branching enzyme	GO:0032801//GO:0006812//GO:0019076	receptor catabolic process//cation transport//viral release from host cell	GO:0005261	cation channel activity	GO:0033644	host cell membrane	KOG0799	Branching enzyme
Cluster-58773.233877	235.513	741.588	-2.4153	0.01483	211	--	--	--	--	961114995	XM_014924882.1	3.78126e-91	PREDICTED: Octopus bimaculoides stabilin-2-like (LOC106876371), mRNA	--	--	--	--	--	--	--	--	--	--	--	GO:0005515	protein binding	--	--	--	--
Cluster-58773.77568	6.64392	35.4402	-1.6548	0.01483	2322	762163171	XP_011419873.1	4.3e-61	PREDICTED: uncharacterized protein LOC105322716 [Crassostrea gigas]	961143049	XM_014934684.1	0	PREDICTED: Octopus bimaculoides uncharacterized LOC106883599 (LOC106883599), partial mRNA	--	--	--	--	--	--	--	PF02845	CUE domain	--	--	--	--	--	--	--	--
Cluster-58773.174306	20.4932	78.5477	-1.9384	0.014921	236	--	--	--	--	--	--	--	--	--	--	--	--	--	--	--	--	--	--	--	--	--	--	--	--	--
Cluster-58773.55954	10.7212	48.0955	-2.1654	0.015083	1567	746816270	NP_001291090.1	4.7e-19	uncharacterized protein LOC105028057 [Esox lucius]>gi|742219553|ref|XP_010898816.1| PREDICTED: uncharacterized protein LOC105028057 isoform X1 [Esox lucius]>gi|742219556|ref|XP_010898817.1| PREDICTED: uncharacterized protein LOC105028057 isoform X1 [Esox lucius]>gi|225716272|gb|ACO13982.1| Histone H3-like centromeric protein A [Esox lucius]	961084085	XM_014914088.1	0	PREDICTED: Octopus bimaculoides histone H3.3-like (LOC106868701), mRNA	--	--	--	--	P22843	4.8e-19	Histone H3 OS=Acropora formosa PE=3 SV=2	PF00125//PF02291//PF02969	Core histone H2A/H2B/H3/H4//Transcription initiation factor IID, 31kD subunit//TATA box binding protein associated factor (TAF)	GO:0006352	DNA-templated transcription, initiation	GO:0003677	DNA binding	GO:0005634	nucleus	KOG1745	Histones H3 and H4
Cluster-58773.178797	15.4669	62.0459	-2.0042	0.015288	554	--	--	--	--	--	--	--	--	--	--	--	--	--	--	--	--	--	--	--	--	--	--	--	--	--
Cluster-58773.171680	1620	4138.27	-1.353	0.015288	5541	762072686	XP_011431618.1	8.9e-97	PREDICTED: MAM and LDL-receptor class A domain-containing protein 2-like [Crassostrea gigas]	961076034	XM_014935299.1	0	PREDICTED: Octopus bimaculoides MAM and LDL-receptor class A domain-containing protein 2-like (LOC106884080), mRNA	--	--	--	--	B3EWZ6	1.3e-47	MAM and LDL-receptor class A domain-containing protein 2 (Fragment) OS=Acropora millepora PE=1 SV=1	PF00089//PF00530//PF08785//PF03425//PF00629//PF00057	Trypsin//Scavenger receptor cysteine-rich domain//Ku C terminal domain like//Carbohydrate binding domain (family 11)//MAM domain, meprin/A5/mu//Low-density lipoprotein receptor domain class A	GO:0005982//GO:0007165//GO:0005985//GO:0030245//GO:0006508	starch metabolic process//signal transduction//sucrose metabolic process//cellulose catabolic process//proteolysis	GO:0005515//GO:0004252//GO:0008810//GO:0005044//GO:0016817	protein binding//serine-type endopeptidase activity//cellulase activity//scavenger receptor activity//hydrolase activity, acting on acid anhydrides	GO:0016020	membrane	KOG1215	Low-density lipoprotein receptors containing Ca2+-binding EGF-like domains
Cluster-58773.182397	2257.01	4388.14	-0.95919	0.015462	2192	541047067	ERG85824.1	1.9e-95	papilin [Ascaris suum]	961101403	XM_014920084.1	0	PREDICTED: Octopus bimaculoides papilin-like (LOC106872908), mRNA	--	--	--	--	Q868Z9	2.8e-89	Papilin OS=Drosophila melanogaster GN=Ppn PE=1 SV=2	PF00014	Kunitz/Bovine pancreatic trypsin inhibitor domain	--	--	GO:0004867	serine-type endopeptidase inhibitor activity	--	--	KOG4597	Serine proteinase inhibitor (KU family) with thrombospondin repeats
Cluster-58773.40511	14.4172	82.4749	-2.5162	0.015533	757	808129802	XP_012167698.1	3.3e-18	PREDICTED: matrix metalloproteinase-14 [Bombus terrestris]	--	--	--	--	--	--	--	--	Q9R0S3	2.6e-18	Matrix metalloproteinase-17 OS=Mus musculus GN=Mmp17 PE=1 SV=3	PF00413	Matrixin	GO:0006508	proteolysis	GO:0008270//GO:0004222	zinc ion binding//metalloendopeptidase activity	GO:0031012	extracellular matrix	KOG1565	Gelatinase A and related matrix metalloproteases
Cluster-58773.97135	527.218	1013.54	-0.94293	0.01559	1547	443701755	ELU00054.1	2.7e-27	hypothetical protein CAPTEDRAFT_153454 [Capitella teleta]	961070208	XM_014919234.1	0	PREDICTED: Octopus bimaculoides uncharacterized LOC106872293 (LOC106872293), mRNA	--	--	--	--	Q99PS1	3.8e-08	Vascular endothelial growth factor A OS=Mesocricetus auratus GN=VEGFA PE=2 SV=1	PF00341	PDGF/VEGF domain	GO:0008283//GO:0040007//GO:0007165	cell proliferation//growth//signal transduction	GO:0008083	growth factor activity	GO:0016020	membrane	--	--
Cluster-58773.224147	1107.51	1966.58	-0.82836	0.016038	3020	762136897	XP_011451733.1	8.3e-214	PREDICTED: 6-phosphogluconate dehydrogenase, decarboxylating-like [Crassostrea gigas]>gi|405976318|gb|EKC40830.1| 6-phosphogluconate dehydrogenase, decarboxylating [Crassostrea gigas]	961113865	XM_014924409.1	0	PREDICTED: Octopus bimaculoides 6-phosphogluconate dehydrogenase, decarboxylating-like (LOC106876031), mRNA	K00033	PGD, gnd, gntZ	6-phosphogluconate dehydrogenase	http://www.genome.jp/dbget-bin/www_bget?ko:K00033	P52209	8.5e-206	6-phosphogluconate dehydrogenase, decarboxylating OS=Homo sapiens GN=PGD PE=1 SV=3	PF14833//PF03446//PF00393	NAD-binding of NADP-dependent 3-hydroxyisobutyrate dehydrogenase//NAD binding domain of 6-phosphogluconate dehydrogenase//6-phosphogluconate dehydrogenase, C-terminal domain	GO:0055114//GO:0006098//GO:0019521	oxidation-reduction process//pentose-phosphate shunt//D-gluconate metabolic process	GO:0051287//GO:0004616//GO:0050661	NAD binding//phosphogluconate dehydrogenase (decarboxylating) activity//NADP binding	--	--	KOG2653	6-phosphogluconate dehydrogenase
Cluster-58773.211178	503.011	1580.93	-1.6521	0.016109	892	676441940	XP_009049647.1	3.4e-14	hypothetical protein LOTGIDRAFT_238761 [Lottia gigantea]>gi|556111034|gb|ESO99685.1| hypothetical protein LOTGIDRAFT_238761 [Lottia gigantea]	961092052	XM_014916882.1	0	PREDICTED: Octopus bimaculoides thyroglobulin-like (LOC106870714), transcript variant X2, mRNA	--	--	--	--	--	--	--	--	--	--	--	--	--	--	--	--	--
Cluster-58773.152796	249.134	539.129	-2.3768	0.01611	474	--	--	--	--	--	--	--	--	--	--	--	--	--	--	--	--	--	--	--	GO:0005515	protein binding	--	--	--	--
Cluster-58773.233590	13.3276	69.2229	-1.1137	0.01611	5661	762085431	XP_011425028.1	3.4e-59	PREDICTED: serine/threonine-protein kinase 11-interacting protein-like isoform X2 [Crassostrea gigas]	961072713	XM_014927947.1	0	PREDICTED: Octopus bimaculoides serine/threonine-protein kinase 11-interacting protein-like (LOC106878643), transcript variant X4, mRNA	--	--	--	--	Q5F479	3.8e-42	Serine/threonine-protein kinase 11-interacting protein OS=Gallus gallus GN=STK11IP PE=2 SV=1	PF13855//PF00560//PF14560	Leucine rich repeat//Leucine Rich Repeat//Ubiquitin-like domain	--	--	--	--	--	--	KOG1259	Nischarin, modulator of integrin alpha5 subunit action
Cluster-58773.152791	13.3693	52.7826	-1.9811	0.016273	889	--	--	--	--	961109577	XM_014922919.1	3.90262e-92	PREDICTED: Octopus bimaculoides mitochondrial uncoupling protein 2-like (LOC106874985), transcript variant X2, mRNA	--	--	--	--	--	--	--	--	--	--	--	--	--	--	--	--	--
Cluster-58773.150485	360.478	824.952	-1.1944	0.016414	5210	871268837	XP_012944616.1	1.4e-274	PREDICTED: cyclin-G-associated kinase-like [Aplysia californica]	961115711	XM_014925189.1	0	PREDICTED: Octopus bimaculoides cyclin-G-associated kinase-like (LOC106876583), mRNA	--	--	--	--	P97874	3.2e-237	Cyclin-G-associated kinase OS=Rattus norvegicus GN=Gak PE=1 SV=1	PF00782//PF00069//PF07714	Dual specificity phosphatase, catalytic domain//Protein kinase domain//Protein tyrosine kinase	GO:0006468//GO:0006470	protein phosphorylation//protein dephosphorylation	GO:0004672//GO:0008138//GO:0005524	protein kinase activity//protein tyrosine/serine/threonine phosphatase activity//ATP binding	--	--	KOG1989	ARK protein kinase family
Cluster-58773.48772	5.76158	55.322	-3.2633	0.016715	500	--	--	--	--	--	--	--	--	--	--	--	--	--	--	--	--	--	--	--	--	--	--	--	--	--
Cluster-58773.181929	308.99	659.255	-1.7248	0.01693	1826	510862104	EPB77486.1	6e-50	transposase [Ancylostoma ceylanicum]	--	--	--	--	--	--	--	--	P35072	3.5e-45	Transposable element Tcb1 transposase OS=Caenorhabditis briggsae PE=3 SV=1	PF09329//PF01498//PF02866	Primase zinc finger//Transposase//lactate/malate dehydrogenase, alpha/beta C-terminal domain	GO:0006836//GO:0006812	neurotransmitter transport//cation transport	GO:0005328	neurotransmitter:sodium symporter activity	GO:0016021	integral component of membrane	--	--
Cluster-58773.224898	434.727	1436.96	-1.0933	0.01693	2450	443707343	ELU02986.1	5.9e-170	hypothetical protein CAPTEDRAFT_176617 [Capitella teleta]	961089177	XM_014915875.1	0	PREDICTED: Octopus bimaculoides sodium- and chloride-dependent glycine transporter 1-like (LOC106869938), mRNA	--	--	--	--	Q761V0	2e-149	Sodium- and chloride-dependent glycine transporter 2 OS=Mus musculus GN=Slc6a5 PE=1 SV=1	PF00209	Sodium:neurotransmitter symporter family	GO:0006313//GO:0055114//GO:0015074//GO:0006260	transposition, DNA-mediated//oxidation-reduction process//DNA integration//DNA replication	GO:0016616//GO:0003677	oxidoreductase activity, acting on the CH-OH group of donors, NAD or NADP as acceptor//DNA binding	GO:0005634	nucleus	KOG3660	Sodium-neurotransmitter symporter
Cluster-58773.170132	4700.66	7844.14	-0.73875	0.01693	943	--	--	--	--	961068419	XM_014913172.1	6.51464e-135	PREDICTED: Octopus bimaculoides uncharacterized LOC106868059 (LOC106868059), mRNA	--	--	--	--	--	--	--	PF09055	Nickel-containing superoxide dismutase	GO:0006801	superoxide metabolic process	GO:0004784//GO:0016151//GO:0016209	superoxide dismutase activity//nickel cation binding//antioxidant activity	--	--	--	--
Cluster-58773.218871	17.6658	65.424	-1.8889	0.016945	2580	762145772	XP_011456166.1	7.7e-19	PREDICTED: uncharacterized protein LOC105348448 [Crassostrea gigas]>gi|762145774|ref|XP_011456167.1| PREDICTED: uncharacterized protein LOC105348448 [Crassostrea gigas]>gi|405977534|gb|EKC41977.1| hypothetical protein CGI_10028159 [Crassostrea gigas]	--	--	--	--	--	--	--	--	--	--	--	--	--	--	--	--	--	--	--	--	--
Cluster-58773.129165	92.2493	223.968	-1.3442	0.016968	1777	--	--	--	--	961074207	XM_014932999.1	0	PREDICTED: Octopus bimaculoides integral membrane protein GPR137B-like (LOC106882348), mRNA	--	--	--	--	--	--	--	PF09153	Domain of unknown function (DUF1938)	--	--	--	--	--	--	--	--
Cluster-58773.169098	74.9644	190.325	-1.2797	0.016968	716	--	--	--	--	--	--	--	--	--	--	--	--	--	--	--	--	--	--	--	--	--	GO:0005737	cytoplasm	--	--
Cluster-58773.176929	0.0001	11.1218	-16.763	0.017032	3512	762108952	XP_011437117.1	2.2e-69	PREDICTED: protein FAM135A-like isoform X2 [Crassostrea gigas]	961108196	XM_014922443.1	0	PREDICTED: Octopus bimaculoides protein FAM135A-like (LOC106874649), mRNA	--	--	--	--	Q9DAI6	1.3e-32	Protein FAM135B OS=Mus musculus GN=Fam135b PE=1 SV=3	PF14993//PF04517	Neuropeptide S precursor protein//Microvirus lysis protein (E), C terminus	GO:0007218//GO:0019054	neuropeptide signaling pathway//modulation by virus of host process	GO:0004857	enzyme inhibitor activity	GO:0005576	extracellular region	--	--
Cluster-58773.201747	232.183	494.62	-1.8283	0.017354	395	676464567	XP_009056962.1	1.9e-06	hypothetical protein LOTGIDRAFT_216931 [Lottia gigantea]>gi|556103755|gb|ESO92407.1| hypothetical protein LOTGIDRAFT_216931 [Lottia gigantea]	961099496	XM_014919409.1	3.21758e-164	PREDICTED: Octopus bimaculoides pancreatic triacylglycerol lipase-like (LOC106872413), mRNA	--	--	--	--	--	--	--	PF01477	PLAT/LH2 domain	--	--	--	--	--	--	--	--
Cluster-58773.223546	20.676	73.4218	-1.0911	0.017354	1619	--	--	--	--	--	--	--	--	--	--	--	--	--	--	--	--	--	--	--	GO:0005515	protein binding	--	--	--	--
Cluster-58773.126902	43.6288	126.331	-1.5339	0.01738	625	507955403	XP_004685260.1	1.6e-18	PREDICTED: serine protease 48 [Condylura cristata]	961121919	XM_014927322.1	0	PREDICTED: Octopus bimaculoides atrial natriuretic peptide-converting enzyme-like (LOC106878182), mRNA	--	--	--	--	Q14B25	1e-17	Serine protease 48 OS=Mus musculus GN=Prss48 PE=2 SV=2	PF00089//PF12515	Trypsin//Ca2+-ATPase N terminal autoinhibitory domain	GO:0006508	proteolysis	GO:0004252//GO:0005516	serine-type endopeptidase activity//calmodulin binding	--	--	KOG3627	Trypsin
Cluster-58773.118616	7.81925	36.4884	-3.7375	0.017476	2195	676489612	XP_009064996.1	2.8e-187	hypothetical protein LOTGIDRAFT_168843 [Lottia gigantea]>gi|556095738|gb|ESO84391.1| hypothetical protein LOTGIDRAFT_168843 [Lottia gigantea]	961113226	XM_014924188.1	0	PREDICTED: Octopus bimaculoides beta-hexosaminidase-like (LOC106875884), mRNA	--	--	--	--	Q04786	1.6e-97	Beta-hexosaminidase OS=Vibrio vulnificus GN=hex PE=3 SV=1	PF00728//PF03648	Glycosyl hydrolase family 20, catalytic domain//Glycosyl hydrolase family 67 N-terminus	--	--	--	--	--	--	KOG2499	Beta-N-acetylhexosaminidase
Cluster-58773.160868	39.9253	532.55	-2.2223	0.017476	1378	--	--	--	--	--	--	--	--	--	--	--	--	--	--	--	--	--	GO:0005975//GO:0045493	carbohydrate metabolic process//xylan catabolic process	GO:0004553//GO:0046559	hydrolase activity, hydrolyzing O-glycosyl compounds//alpha-glucuronidase activity	--	--	--	--
Cluster-58773.98587	566.771	1107.22	-0.96611	0.017613	974	309318773	BAJ23047.1	1.3e-46	peptidoglycan-recognition protein-SC2 [Tenebrio molitor]	961132031	XM_014930850.1	1.92685e-115	PREDICTED: Octopus bimaculoides peptidoglycan-recognition protein 2-like (LOC106880754), mRNA	--	--	--	--	Q70PY2	5.2e-40	Peptidoglycan-recognition protein SB1 OS=Drosophila melanogaster GN=PGRP-SB1 PE=2 SV=2	PF05297//PF01510	Herpesvirus latent membrane protein 1 (LMP1)//N-acetylmuramoyl-L-alanine amidase	GO:0006807//GO:0009253//GO:0009252//GO:0019087	nitrogen compound metabolic process//peptidoglycan catabolic process//peptidoglycan biosynthetic process//transformation of host cell by virus	GO:0008745	N-acetylmuramoyl-L-alanine amidase activity	GO:0016021	integral component of membrane	--	--
Cluster-58773.177980	227.92	486.324	-1.0934	0.017725	2204	762073273	XP_011432761.1	8.6e-120	PREDICTED: solute carrier family 15 member 4-like [Crassostrea gigas]>gi|405975435|gb|EKC40000.1| Solute carrier family 15 member 4 [Crassostrea gigas]	961116460	XM_014925441.1	0	PREDICTED: Octopus bimaculoides solute carrier family 15 member 4-like (LOC106876753), partial mRNA	--	--	--	--	Q8N697	5.1e-83	Solute carrier family 15 member 4 OS=Homo sapiens GN=SLC15A4 PE=1 SV=1	PF00854//PF07690	POT family//Major Facilitator Superfamily	GO:0055085//GO:0006810	transmembrane transport//transport	GO:0005215	transporter activity	GO:0016021//GO:0016020	integral component of membrane//membrane	KOG1237	H+/oligopeptide symporter
Cluster-58773.163487	7.55456	35.5905	-2.2361	0.018637	1965	827342572	NP_001017633.2	5.3e-129	uncharacterized protein LOC550326 precursor [Danio rerio]	961131818	XM_014930776.1	0	PREDICTED: Octopus bimaculoides counting factor associated protein D-like (LOC106880703), partial mRNA	--	--	--	--	Q54TR1	7.5e-54	Counting factor associated protein D OS=Dictyostelium discoideum GN=cfaD PE=1 SV=1	PF00112	Papain family cysteine protease	GO:0006508	proteolysis	GO:0008234	cysteine-type peptidase activity	--	--	KOG1543	Cysteine proteinase Cathepsin L
Cluster-58773.164421	123.846	295.304	-3.0958	0.018731	702	--	--	--	--	961082002	XM_014913372.1	3.11447e-77	PREDICTED: Octopus bimaculoides uncharacterized LOC106868210 (LOC106868210), mRNA	--	--	--	--	--	--	--	--	--	GO:0016485//GO:0007067//GO:0008152//GO:0051382	protein processing//mitotic nuclear division//metabolic process//kinetochore assembly	GO:0003677//GO:0016787	DNA binding//hydrolase activity	GO:0016021	integral component of membrane	--	--
Cluster-58773.49739	2.06758	17.6767	-1.2537	0.018731	3036	762147539	XP_011457085.1	7.5e-223	PREDICTED: glutamate carboxypeptidase 2-like isoform X8 [Crassostrea gigas]	961080989	XM_014913032.1	0	PREDICTED: Octopus bimaculoides N-acetylated-alpha-linked acidic dipeptidase 2-like (LOC106867954), mRNA	--	--	--	--	Q9Y3Q0	4.6e-159	N-acetylated-alpha-linked acidic dipeptidase 2 OS=Homo sapiens GN=NAALAD2 PE=1 SV=1	PF05450//PF15510//PF01546	Nicastrin//Centromere kinetochore component W//Peptidase family M20/M25/M40	--	--	--	--	--	--	KOG2195	Transferrin receptor and related proteins containing the protease-associated (PA) domain
Cluster-58773.107919	0.0001	6.40299	-15.9665	0.019087	617	--	--	--	--	--	--	--	--	--	--	--	--	--	--	--	--	--	--	--	--	--	--	--	--	--
Cluster-58773.144991	27.4585	89.7737	-1.709	0.01909	2902	--	--	--	--	961068590	XM_014913774.1	0	PREDICTED: Octopus bimaculoides uncharacterized LOC106868483 (LOC106868483), transcript variant X1, mRNA	--	--	--	--	--	--	--	--	--	--	--	--	--	--	--	--	--
Cluster-58773.107497	9.66297	42.3889	-2.1331	0.019272	429	--	--	--	--	--	--	--	--	--	--	--	--	--	--	--	--	--	--	--	--	--	--	--	--	--
Cluster-58773.224364	136.221	317.281	-1.2198	0.019346	2049	762070422	XP_011448616.1	5.4e-76	PREDICTED: uncharacterized protein LOC105343036 isoform X2 [Crassostrea gigas]	961107276	XM_014922121.1	0	PREDICTED: Octopus bimaculoides uncharacterized LOC106874396 (LOC106874396), mRNA	--	--	--	--	--	--	--	PF08039	Mitochondrial proteolipid	--	--	--	--	GO:0005739	mitochondrion	--	--
Cluster-58773.137024	195.688	430.435	-1.1372	0.019401	722	--	--	--	--	961079248	XM_014912417.1	0	PREDICTED: Octopus bimaculoides uncharacterized LOC106867522 (LOC106867522), mRNA	--	--	--	--	--	--	--	PF00063	Myosin head (motor domain)	--	--	GO:0003774//GO:0005524	motor activity//ATP binding	GO:0016459	myosin complex	--	--
Cluster-58773.101608	1237.78	2295.62	-1.0917	0.019454	1312	780172842	XP_011660820.1	8.5e-99	PREDICTED: LOW QUALITY PROTEIN: deleted in malignant brain tumors 1 protein [Strongylocentrotus purpuratus]	961118518	XM_014926157.1	0	PREDICTED: Octopus bimaculoides neurotrypsin-like (LOC106877287), partial mRNA	K13912	DMBT1	deleted in malignant brain tumors 1 protein	http://www.genome.jp/dbget-bin/www_bget?ko:K13912	Q9NR16	5.5e-85	Scavenger receptor cysteine-rich type 1 protein M160 OS=Homo sapiens GN=CD163L1 PE=1 SV=2	PF04444//PF00530//PF15494//PF09272	Catechol dioxygenase N terminus//Scavenger receptor cysteine-rich domain//Scavenger receptor cysteine-rich domain//Hepsin, SRCR	GO:0034219//GO:0007165//GO:0008643	carbohydrate transmembrane transport//signal transduction//carbohydrate transport	GO:0005179//GO:0015144	hormone activity//carbohydrate transmembrane transporter activity	GO:0016021//GO:0005576	integral component of membrane//extracellular region	--	--
Cluster-58773.113846	354.89	756.373	-0.89113	0.019454	1671	762170369	XP_011423612.1	1.3e-131	PREDICTED: programmed cell death protein 4-like [Crassostrea gigas]>gi|405965826|gb|EKC31180.1| Programmed cell death protein 4 [Crassostrea gigas]	961083640	XM_014913930.1	0	PREDICTED: Octopus bimaculoides programmed cell death protein 4-like (LOC106868596), mRNA	K16865	PDCD4	programmed cell death protein 4	http://www.genome.jp/dbget-bin/www_bget?ko:K16865	Q9JID1	7.5e-95	Programmed cell death protein 4 OS=Rattus norvegicus GN=Pdcd4 PE=1 SV=2	PF03488//PF06800	Nematode insulin-related peptide beta type//Sugar transport protein	GO:0007165//GO:0042184//GO:0046232//GO:0042203//GO:0019261//GO:0018874//GO:0009712//GO:0055114	signal transduction//xylene catabolic process//carbazole catabolic process//toluene catabolic process//1,4-dichlorobenzene catabolic process//benzoate metabolic process//catechol-containing compound metabolic process//oxidation-reduction process	GO:0005506//GO:0004252//GO:0018576//GO:0070008//GO:0005044	iron ion binding//serine-type endopeptidase activity//catechol 1,2-dioxygenase activity//serine-type exopeptidase activity//scavenger receptor activity	GO:0016020	membrane	KOG0403	Neoplastic transformation suppressor Pdcd4/MA-3, contains MA3 domain
Cluster-58773.81017	55.0072	149.223	-1.4398	0.019536	2672	762134989	XP_011450736.1	1.3e-74	PREDICTED: vacuolar protein 8-like isoform X1 [Crassostrea gigas]>gi|762134991|ref|XP_011450737.1| PREDICTED: vacuolar protein 8-like isoform X1 [Crassostrea gigas]	961127878	XM_014929399.1	0	PREDICTED: Octopus bimaculoides vacuolar protein 8-like (LOC106879720), mRNA	--	--	--	--	Q2U5T5	6.2e-43	Vacuolar protein 8 OS=Aspergillus oryzae (strain ATCC 42149 / RIB 40) GN=vac8 PE=3 SV=1	PF02985//PF00514	HEAT repeat//Armadillo/beta-catenin-like repeat	--	--	GO:0005515	protein binding	--	--	KOG1048	Neural adherens junction protein Plakophilin and related Armadillo repeat proteins
Cluster-58773.38812	0.585128	9.36197	-16.0622	0.019598	809	--	--	--	--	--	--	--	--	--	--	--	--	--	--	--	--	--	--	--	--	--	--	--	--	--
Cluster-6250.0	0.0001	6.84249	-4	0.019598	1312	--	--	--	--	--	--	--	--	--	--	--	--	--	--	--	--	--	--	--	--	--	--	--	--	--
Cluster-58773.155244	60.2326	157.12	-1.3833	0.019598	2003	--	--	--	--	--	--	--	--	--	--	--	--	--	--	--	--	--	--	--	--	--	--	--	--	--
Cluster-58773.146114	24.01	298.791	-3.6374	0.019605	2033	762126171	XP_011446133.1	2.1e-136	PREDICTED: sodium-dependent phosphate transport protein 2B-like [Crassostrea gigas]>gi|405971981|gb|EKC36780.1| Sodium-dependent phosphate transport protein 2B [Crassostrea gigas]	961127766	XM_014929362.1	0	PREDICTED: Octopus bimaculoides sodium-dependent phosphate transport protein 2B-like (LOC106879685), mRNA	--	--	--	--	Q28620	1.4e-116	Sodium-dependent phosphate transport protein 2A OS=Oryctolagus cuniculus GN=SLC34A1 PE=2 SV=1	PF02690	Na+/Pi-cotransporter	GO:0006817//GO:0044341	phosphate ion transport//sodium-dependent phosphate transport	GO:0015321	sodium-dependent phosphate transmembrane transporter activity	GO:0016020	membrane	--	--
Cluster-58773.96112	249.682	629.428	-1.3339	0.01978	4540	762091411	XP_011428101.1	9.9e-86	PREDICTED: uncharacterized protein LOC105328789 [Crassostrea gigas]>gi|762091413|ref|XP_011428102.1| PREDICTED: uncharacterized protein LOC105328789 [Crassostrea gigas]>gi|405961225|gb|EKC27059.1| Mitosis inhibitor protein kinase wee1 [Crassostrea gigas]	961118715	XM_014926225.1	0	PREDICTED: Octopus bimaculoides uncharacterized LOC106877344 (LOC106877344), transcript variant X2, mRNA	--	--	--	--	B3DL84	1.1e-10	Serine/threonine-protein kinase PLK4 OS=Xenopus tropicalis GN=plk4 PE=2 SV=1	PF00069//PF00005//PF07714//PF00735//PF02367//PF00158//PF05384//PF03193//PF00437//PF01926//PF06414	Protein kinase domain//ABC transporter//Protein tyrosine kinase//Septin//Threonylcarbamoyl adenosine biosynthesis protein TsaE//Sigma-54 interaction domain//Sensor protein DegS//Protein of unknown function, DUF258//Type II/IV secretion system protein//50S ribosome-binding GTPase//Zeta toxin	GO:0006355//GO:0002949//GO:0006810//GO:0007165//GO:0006468	regulation of transcription, DNA-templated//tRNA threonylcarbamoyladenosine modification//transport//signal transduction//protein phosphorylation	GO:0004672//GO:0016887//GO:0008134//GO:0003924//GO:0016301//GO:0005524//GO:0005525	protein kinase activity//ATPase activity//transcription factor binding//GTPase activity//kinase activity//ATP binding//GTP binding	GO:0005667	transcription factor complex	KOG0583	Serine/threonine protein kinase
Cluster-58773.137029	1364.9	5224.89	-1.9953	0.020435	1975	676487301	XP_009064248.1	3.2e-09	hypothetical protein LOTGIDRAFT_235960 [Lottia gigantea]>gi|556096455|gb|ESO85107.1| hypothetical protein LOTGIDRAFT_235960 [Lottia gigantea]	961079248	XM_014912417.1	0	PREDICTED: Octopus bimaculoides uncharacterized LOC106867522 (LOC106867522), mRNA	--	--	--	--	--	--	--	PF07095//PF00063	Intracellular growth attenuator protein IgaA//Myosin head (motor domain)	GO:0006030	chitin metabolic process	GO:0008061	chitin binding	GO:0005576	extracellular region	--	--
Cluster-58773.235141	260.163	1037.25	-1.9366	0.020435	541	524878917	XP_005096139.1	4.8e-32	PREDICTED: uncharacterized protein LOC101849999 [Aplysia californica]>gi|871225581|ref|XP_012936664.1| PREDICTED: uncharacterized protein LOC101849999 [Aplysia californica]	961082696	XM_014913612.1	9.68284e-166	PREDICTED: Octopus bimaculoides uncharacterized LOC106868385 (LOC106868385), mRNA	--	--	--	--	--	--	--	PF01607	Chitin binding Peritrophin-A domain	--	--	GO:0005524//GO:0003774	ATP binding//motor activity	GO:0016459//GO:0009276//GO:0016021	myosin complex//Gram-negative-bacterium-type cell wall//integral component of membrane	--	--
Cluster-58773.115752	0.351138	8.36294	-4.5739	0.020505	1619	696964858	XP_009570248.1	1.7e-72	PREDICTED: LOW QUALITY PROTEIN: heparan sulfate glucosamine 3-O-sulfotransferase 5 [Cuculus canorus]	961072270	XM_014926437.1	0	PREDICTED: Octopus bimaculoides heparan sulfate glucosamine 3-O-sulfotransferase 5-like (LOC106877503), transcript variant X2, mRNA	--	--	--	--	Q8BSL4	1.3e-72	Heparan sulfate glucosamine 3-O-sulfotransferase 5 OS=Mus musculus GN=Hs3st5 PE=2 SV=1	PF00685	Sulfotransferase domain	--	--	GO:0008146	sulfotransferase activity	--	--	KOG3704	Heparan sulfate D-glucosaminyl 3-O-sulfotransferase
Cluster-58773.213183	114.312	280.976	-1.2975	0.020542	1998	676455446	XP_009054008.1	8.2e-61	hypothetical protein LOTGIDRAFT_117194, partial [Lottia gigantea]>gi|556106854|gb|ESO95506.1| hypothetical protein LOTGIDRAFT_117194, partial [Lottia gigantea]	961133048	XM_014931203.1	0	PREDICTED: Octopus bimaculoides zinc transporter ZIP14-like (LOC106881017), mRNA	--	--	--	--	Q9C0K1	1.2e-43	Zinc transporter ZIP8 OS=Homo sapiens GN=SLC39A8 PE=2 SV=1	PF01036//PF02535	Bacteriorhodopsin-like protein//ZIP Zinc transporter	GO:0030001//GO:0055085	metal ion transport//transmembrane transport	GO:0046873	metal ion transmembrane transporter activity	GO:0016020	membrane	KOG2693	Putative zinc transporter
Cluster-58773.126904	25.3485	172.721	-2.7685	0.020807	665	--	--	--	--	961111759	XM_014923683.1	7.56734e-133	PREDICTED: Octopus bimaculoides serine protease 48-like (LOC106875508), mRNA	--	--	--	--	--	--	--	--	--	--	--	--	--	--	--	--	--
Cluster-58773.120341	4.00345	25.2311	-2.6559	0.020917	1695	--	--	--	--	45825211	AC115055.9	3.0725e-06	Mus musculus chromosome 3, clone RP24-346I12, complete sequence	--	--	--	--	--	--	--	PF08027	Albumin I chain b	GO:0009405	pathogenesis	GO:0045735	nutrient reservoir activity	--	--	--	--
Cluster-58773.151295	260.509	606.112	-1.2183	0.020997	4992	443731195	ELU16432.1	0	hypothetical protein CAPTEDRAFT_138805 [Capitella teleta]	961113833	XM_014924399.1	0	PREDICTED: Octopus bimaculoides patatin-like phospholipase domain-containing protein 7 (LOC106876024), mRNA	--	--	--	--	Q8IY17	0	Neuropathy target esterase OS=Homo sapiens GN=PNPLA6 PE=1 SV=2	PF01734	Patatin-like phospholipase	GO:0006629	lipid metabolic process	--	--	--	--	KOG2968	Predicted esterase of the alpha-beta hydrolase superfamily (Neuropathy target esterase), contains cAMP-binding domains
Cluster-58773.156991	1.46265	50.3339	-5.1049	0.021023	1405	597891351	EYC39621.1	8.2e-23	hypothetical protein Y032_0649g1126 [Ancylostoma ceylanicum]	961101286	XM_014920043.1	0	PREDICTED: Octopus bimaculoides BTB/POZ domain-containing adapter for CUL3-mediated RhoA degradation protein 3-like (LOC106872887), mRNA	--	--	--	--	--	--	--	--	--	--	--	--	--	--	--	--	--
Cluster-58773.153084	660.871	1442.45	-1.1261	0.021864	6942	762147073	XP_011456838.1	2.4e-75	PREDICTED: sodium- and chloride-dependent glycine transporter 1-like [Crassostrea gigas]>gi|405951601|gb|EKC19499.1| Sodium- and chloride-dependent glycine transporter 2 [Crassostrea gigas]	961084215	XM_014914134.1	0	PREDICTED: Octopus bimaculoides sodium- and chloride-dependent glycine transporter 1-like (LOC106868737), mRNA	--	--	--	--	Q9C056	2e-53	Homeobox protein Nkx-6.2 OS=Homo sapiens GN=NKX6-2 PE=2 SV=2	PF05210//PF00558//PF03083//PF00046//PF00209//PF05920//PF08053//PF00858	Sprouty protein (Spry)//Vpu protein//Sugar efflux transporter for intercellular exchange//Homeobox domain//Sodium:neurotransmitter symporter family//Homeobox KN domain//Tryptophanase operon leader peptide//Amiloride-sensitive sodium channel	GO:0009966//GO:0031556//GO:0006836//GO:0031554//GO:0032801//GO:0006812//GO:0006355//GO:0019076//GO:0006814//GO:0007275	regulation of signal transduction//transcriptional attenuation by ribosome//neurotransmitter transport//regulation of DNA-templated transcription, termination//receptor catabolic process//cation transport//regulation of transcription, DNA-templated//viral release from host cell//sodium ion transport//multicellular organismal development	GO:0005272//GO:0005328//GO:0003677//GO:0005261	sodium channel activity//neurotransmitter:sodium symporter activity//DNA binding//cation channel activity	GO:0016021//GO:0033644//GO:0016020	integral component of membrane//host cell membrane//membrane	KOG3660	Sodium-neurotransmitter symporter
Cluster-58773.250779	1.67425	15.5136	-3.2119	0.021884	2031	--	--	--	--	--	--	--	--	--	--	--	--	--	--	--	PF00098	Zinc knuckle	--	--	GO:0003676//GO:0008270	nucleic acid binding//zinc ion binding	--	--	--	--
Cluster-58773.107188	252.618	975.403	-1.949	0.0219	1054	--	--	--	--	961141512	XM_014934134.1	0	PREDICTED: Octopus bimaculoides uncharacterized LOC106883213 (LOC106883213), mRNA	--	--	--	--	--	--	--	PF01607	Chitin binding Peritrophin-A domain	GO:0006030	chitin metabolic process	GO:0008061	chitin binding	GO:0005576	extracellular region	--	--
Cluster-58773.133923	1969.06	3355.24	-0.76891	0.02192	4043	762081244	XP_011421205.1	2.7e-268	PREDICTED: V-type proton ATPase 116 kDa subunit a isoform 1-like isoform X4 [Crassostrea gigas]	961100833	XM_014919878.1	0	PREDICTED: Octopus bimaculoides V-type proton ATPase 116 kDa subunit a isoform 1-like (LOC106872779), mRNA	--	--	--	--	Q29466	3.7e-257	V-type proton ATPase 116 kDa subunit a isoform 1 OS=Bos taurus GN=ATP6V0A1 PE=2 SV=1	PF01496	V-type ATPase 116kDa subunit family	GO:0015991//GO:0015992	ATP hydrolysis coupled proton transport//proton transport	GO:0015078	hydrogen ion transmembrane transporter activity	GO:0033179	proton-transporting V-type ATPase, V0 domain	KOG2189	Vacuolar H+-ATPase V0 sector, subunit a
Cluster-58773.39612	12.2969	52.0271	-2.081	0.021946	475	762110627	XP_011438010.1	4.1e-11	PREDICTED: A disintegrin and metalloproteinase with thrombospondin motifs 6-like isoform X1 [Crassostrea gigas]	961067758	XM_014933311.1	0	PREDICTED: Octopus bimaculoides A disintegrin and metalloproteinase with thrombospondin motifs 12-like (LOC106882557), mRNA	--	--	--	--	--	--	--	--	--	--	--	--	--	--	--	--	--
Cluster-58773.190366	10.3472	45.2016	-2.1271	0.022006	763	--	--	--	--	1000765673	XM_015750463.1	1.34973e-06	PREDICTED: Cephus cinctus protein vein (LOC107272866), transcript variant X5, mRNA	--	--	--	--	--	--	--	PF00531	Death domain	GO:0007165	signal transduction	GO:0005515	protein binding	--	--	--	--
Cluster-58773.176634	211.679	705.412	-1.7366	0.022079	2613	657741131	XP_008305640.1	8.5e-82	PREDICTED: LOW QUALITY PROTEIN: SCO-spondin [Cynoglossus semilaevis]	961133045	XM_014931202.1	0	PREDICTED: Octopus bimaculoides SCO-spondin-like (LOC106881016), partial mRNA	--	--	--	--	Q2PC93	3.1e-47	SCO-spondin OS=Gallus gallus GN=SSPO PE=2 SV=1	PF00093	von Willebrand factor type C domain	--	--	GO:0005515	protein binding	--	--	KOG3611	Semaphorins
Cluster-58773.146333	0.0001	25.4381	-17.9566	0.022331	2861	871242540	XP_012939802.1	2.3e-109	PREDICTED: rab11 family-interacting protein 4B-like isoform X2 [Aplysia californica]	961070705	XM_014920958.1	0	PREDICTED: Octopus bimaculoides rab11 family-interacting protein 4A-like (LOC106873536), transcript variant X4, mRNA	--	--	--	--	Q3LGD4	1.6e-52	Rab11 family-interacting protein 4A OS=Danio rerio GN=rab11fip4a PE=2 SV=1	PF00036//PF06005//PF16715//PF13405//PF01166//PF13499//PF13833	EF hand//Protein of unknown function (DUF904)//Cyclodipeptide synthase//EF-hand domain//TSC-22/dip/bun family//EF-hand domain pair//EF-hand domain pair	GO:0006355//GO:0043093//GO:0000917	regulation of transcription, DNA-templated//FtsZ-dependent cytokinesis//barrier septum assembly	GO:0003700//GO:0016755//GO:0005509	transcription factor activity, sequence-specific DNA binding//transferase activity, transferring amino-acyl groups//calcium ion binding	GO:0005667//GO:0005737	transcription factor complex//cytoplasm	--	--
Cluster-58773.169818	289.08	662.314	-1.196	0.022368	2592	762168376	XP_011422559.1	2.6e-91	PREDICTED: E3 ubiquitin-protein ligase MIB2-like isoform X1 [Crassostrea gigas]>gi|762168378|ref|XP_011422560.1| PREDICTED: E3 ubiquitin-protein ligase MIB2-like isoform X1 [Crassostrea gigas]	961131292	XM_014930588.1	0	PREDICTED: Octopus bimaculoides E3 ubiquitin-protein ligase MIB2-like (LOC106880584), mRNA	--	--	--	--	Q96AX9	1.4e-60	E3 ubiquitin-protein ligase MIB2 OS=Homo sapiens GN=MIB2 PE=1 SV=3	PF00023//PF13606//PF00018	Ankyrin repeat//Ankyrin repeat//SH3 domain	--	--	GO:0005515	protein binding	--	--	KOG0504	FOG: Ankyrin repeat
Cluster-58773.102754	96.5683	234.163	-1.2779	0.022435	5817	762129988	XP_011448123.1	0	PREDICTED: brefeldin A-inhibited guanine nucleotide-exchange protein 1-like isoform X6 [Crassostrea gigas]>gi|762129992|ref|XP_011448125.1| PREDICTED: brefeldin A-inhibited guanine nucleotide-exchange protein 1-like isoform X8 [Crassostrea gigas]	961096337	XM_014918367.1	0	PREDICTED: Octopus bimaculoides brefeldin A-inhibited guanine nucleotide-exchange protein 1-like (LOC106871743), transcript variant X6, mRNA	--	--	--	--	O46382	0	Brefeldin A-inhibited guanine nucleotide-exchange protein 1 OS=Bos taurus GN=ARFGEF1 PE=1 SV=1	PF01369//PF04999//PF01445	Sec7 domain//Cell division protein FtsL//Viral small hydrophobic protein	GO:0007049//GO:0051301//GO:0043087//GO:0032012	cell cycle//cell division//regulation of GTPase activity//regulation of ARF protein signal transduction	GO:0005086	ARF guanyl-nucleotide exchange factor activity	GO:0016020//GO:0016021	membrane//integral component of membrane	KOG0929	Guanine nucleotide exchange factor
Cluster-58773.160165	70.2507	189.188	-1.4292	0.022529	539	--	--	--	--	961085712	XR_001409372.1	0	PREDICTED: Octopus bimaculoides uncharacterized LOC106869113 (LOC106869113), ncRNA	--	--	--	--	--	--	--	PF00612//PF02827	IQ calmodulin-binding motif//cAMP-dependent protein kinase inhibitor	GO:0045859//GO:0006469	regulation of protein kinase activity//negative regulation of protein kinase activity	GO:0004862//GO:0005515	cAMP-dependent protein kinase inhibitor activity//protein binding	GO:0005952	cAMP-dependent protein kinase complex	--	--
Cluster-58773.172189	202.062	606.004	-1.5845	0.022929	4306	762075651	XP_011443360.1	4.2e-163	PREDICTED: dual specificity mitogen-activated protein kinase kinase 1-like isoform X1 [Crassostrea gigas]	961132421	XM_014930989.1	0	PREDICTED: Octopus bimaculoides dual specificity mitogen-activated protein kinase kinase 1-like (LOC106880850), transcript variant X2, mRNA	--	--	--	--	Q05116	2.3e-140	Dual specificity mitogen-activated protein kinase kinase 1 OS=Xenopus laevis GN=map2k1 PE=1 SV=2	PF00444//PF02402//PF00069//PF01400//PF00413//PF07714//PF00629	Ribosomal protein L36//Lysis protein//Protein kinase domain//Astacin (Peptidase family M12A)//Matrixin//Protein tyrosine kinase//MAM domain, meprin/A5/mu	GO:0009405//GO:0042254//GO:0006412//GO:0006468//GO:0006508//GO:0019835	pathogenesis//ribosome biogenesis//translation//protein phosphorylation//proteolysis//cytolysis	GO:0004222//GO:0005524//GO:0004672//GO:0008270//GO:0003735	metalloendopeptidase activity//ATP binding//protein kinase activity//zinc ion binding//structural constituent of ribosome	GO:0016020//GO:0019867//GO:0005622//GO:0031012//GO:0005840	membrane//outer membrane//intracellular//extracellular matrix//ribosome	KOG0581	Mitogen-activated protein kinase kinase (MAP2K)
Cluster-58773.37884	3.98282	24.5082	-2.6214	0.022939	1100	761915778	XP_011406906.1	1.4e-06	PREDICTED: deleted in malignant brain tumors 1 protein-like, partial [Amphimedon queenslandica]	961075128	XR_001411168.1	2.94552e-84	PREDICTED: Octopus bimaculoides uncharacterized LOC106883857 (LOC106883857), ncRNA	--	--	--	--	P30205	8.6e-07	Antigen WC1.1 OS=Bos taurus PE=2 SV=1	PF15494//PF00530	Scavenger receptor cysteine-rich domain//Scavenger receptor cysteine-rich domain	GO:0007165	signal transduction	GO:0005044	scavenger receptor activity	GO:0016020	membrane	--	--
Cluster-58773.79260	4.69758	29.0248	-2.6273	0.023166	835	--	--	--	--	961101515	XM_014920120.1	0	PREDICTED: Octopus bimaculoides dehydrodolichyl diphosphate syntase complex subunit nus1-like (LOC106872942), mRNA	--	--	--	--	--	--	--	--	--	--	--	--	--	--	--	--	--
Cluster-58773.164532	1772.59	4073.54	-1.2004	0.023166	2198	762169924	XP_011423378.1	6.7e-181	PREDICTED: uncharacterized protein LOC105325490 isoform X1 [Crassostrea gigas]	961088902	XM_014915789.1	0	PREDICTED: Octopus bimaculoides angiotensin-converting enzyme-like (LOC106869868), transcript variant X2, mRNA	--	--	--	--	Q9GLN7	7.7e-156	Angiotensin-converting enzyme OS=Pan troglodytes GN=ACE PE=3 SV=1	PF01401//PF00924	Angiotensin-converting enzyme//Mechanosensitive ion channel	GO:0006508//GO:0055085	proteolysis//transmembrane transport	GO:0008237//GO:0008241	metallopeptidase activity//peptidyl-dipeptidase activity	GO:0016020	membrane	KOG3690	Angiotensin I-converting enzymes - M2 family peptidases
Cluster-58773.101139	488.035	938.236	-0.94297	0.023283	1502	762170850	XP_011423863.1	8.8e-108	PREDICTED: probable peptidylglycine alpha-hydroxylating monooxygenase Y71G12B.4 [Crassostrea gigas]>gi|762170852|ref|XP_011423864.1| PREDICTED: probable peptidylglycine alpha-hydroxylating monooxygenase Y71G12B.4 [Crassostrea gigas]>gi|762170854|ref|XP_011423865.1| PREDICTED: probable peptidylglycine alpha-hydroxylating monooxygenase Y71G12B.4 [Crassostrea gigas]	961092484	XM_014917026.1	0	PREDICTED: Octopus bimaculoides probable peptidylglycine alpha-hydroxylating monooxygenase 1 (LOC106870812), transcript variant X1, mRNA	--	--	--	--	Q95XM2	2.8e-77	Probable peptidylglycine alpha-hydroxylating monooxygenase 1 OS=Caenorhabditis elegans GN=pghm-1 PE=1 SV=1	PF11722//PF01082	CCCH zinc finger in TRM13 protein//Copper type II ascorbate-dependent monooxygenase, N-terminal domain	GO:0055114	oxidation-reduction process	GO:0016715//GO:0004497//GO:0005507//GO:0008168	oxidoreductase activity, acting on paired donors, with incorporation or reduction of molecular oxygen, reduced ascorbate as one donor, and incorporation of one atom of oxygen//monooxygenase activity//copper ion binding//methyltransferase activity	--	--	KOG3567	Peptidylglycine alpha-amidating monooxygenase
Cluster-58773.153451	0.0001	42.3611	-18.6924	0.023559	3180	--	--	--	--	--	--	--	--	--	--	--	--	--	--	--	PF02944	BESS motif	--	--	GO:0003677	DNA binding	--	--	--	--
Cluster-58773.172655	8.54019	38.6339	-2.1775	0.023609	1711	321469422	EFX80402.1	4e-32	hypothetical protein DAPPUDRAFT_318582 [Daphnia pulex]	961069314	XM_014916171.1	0	PREDICTED: Octopus bimaculoides uncharacterized LOC106870169 (LOC106870169), mRNA	--	--	--	--	Q5ZJU0	8.6e-22	Monocarboxylate transporter 9 OS=Gallus gallus GN=SLC16A9 PE=2 SV=1	PF07690	Major Facilitator Superfamily	GO:0055085	transmembrane transport	--	--	GO:0016021	integral component of membrane	--	--
Cluster-58773.166547	7.61776	37.1984	-2.2878	0.024132	846	23096074	BAC16238.1	1.4e-99	myosinase-I [Todarodes pacificus]	961100747	XM_014919848.1	0	PREDICTED: Octopus bimaculoides high choriolytic enzyme 2-like (LOC106872756), mRNA	--	--	--	--	Q20191	9.2e-33	Zinc metalloproteinase nas-13 OS=Caenorhabditis elegans GN=nas-13 PE=2 SV=5	PF00629//PF01400	MAM domain, meprin/A5/mu//Astacin (Peptidase family M12A)	GO:0006508	proteolysis	GO:0004222	metalloendopeptidase activity	GO:0016020	membrane	KOG3714	Meprin A metalloprotease
Cluster-58773.164603	9946.12	15174.7	-0.60946	0.024239	1534	269996958	ACZ57764.1	1.8e-87	reflectin-like protein A1 [Doryteuthis pealeii]	961113053	XM_014924129.1	0	PREDICTED: Octopus bimaculoides hexamerin-like (LOC106875839), mRNA	--	--	--	--	--	--	--	--	--	--	--	--	--	--	--	--	--
Cluster-58773.16320	28.0478	89.7257	-1.6776	0.024269	2119	871253826	XP_012941805.1	9.4e-55	PREDICTED: uncharacterized protein LOC101862058 [Aplysia californica]	961134677	XM_014931773.1	0	PREDICTED: Octopus bimaculoides uncharacterized LOC106881396 (LOC106881396), mRNA	--	--	--	--	Q6DHQ1	4.7e-09	Voltage-gated hydrogen channel 1 OS=Danio rerio GN=hvcn1 PE=2 SV=1	PF00520	Ion transport protein	GO:0055085//GO:0006811	transmembrane transport//ion transport	GO:0005216	ion channel activity	GO:0016020	membrane	--	--
Cluster-58773.158866	126.608	292.108	-1.2061	0.024628	2079	762107499	XP_011436356.1	4.5e-86	PREDICTED: beta-1,3-galactosyl-O-glycosyl-glycoprotein beta-1,6-N-acetylglucosaminyltransferase 4-like [Crassostrea gigas]>gi|762107501|ref|XP_011436357.1| PREDICTED: beta-1,3-galactosyl-O-glycosyl-glycoprotein beta-1,6-N-acetylglucosaminyltransferase 4-like [Crassostrea gigas]>gi|405978192|gb|EKC42602.1| Beta-1,3-galactosyl-O-glycosyl-glycoprotein beta-1,6-N-acetylglucosaminyltransferase [Crasso…	961074011	XM_014932347.1	0	PREDICTED: Octopus bimaculoides beta-1,3-galactosyl-O-glycosyl-glycoprotein beta-1,6-N-acetylglucosaminyltransferase-like (LOC106881829), mRNA	--	--	--	--	Q09324	6.1e-54	Beta-1,3-galactosyl-O-glycosyl-glycoprotein beta-1,6-N-acetylglucosaminyltransferase OS=Mus musculus GN=Gcnt1 PE=1 SV=2	PF02485	Core-2/I-Branching enzyme	--	--	GO:0008375	acetylglucosaminyltransferase activity	GO:0016020	membrane	KOG0799	Branching enzyme
Cluster-58773.154472	782.725	1663.6	-1.0877	0.024628	1869	676432390	XP_009046558.1	3.4e-157	hypothetical protein LOTGIDRAFT_111147 [Lottia gigantea]>gi|556114436|gb|ESP03088.1| hypothetical protein LOTGIDRAFT_111147 [Lottia gigantea]	961108832	XM_014922656.1	0	PREDICTED: Octopus bimaculoides pyruvate dehydrogenase (acetyl-transferring) kinase, mitochondrial-like (LOC106874800), mRNA	--	--	--	--	P91622	1.7e-135	[Pyruvate dehydrogenase (acetyl-transferring)] kinase, mitochondrial OS=Drosophila melanogaster GN=Pdk PE=2 SV=2	--	--	--	--	--	--	--	--	KOG0787	Dehydrogenase kinase
Cluster-58773.121625	2.68961	18.926	-2.8149	0.024655	2159	--	--	--	--	961090424	XM_014916316.1	1.10382e-180	PREDICTED: Octopus bimaculoides paladin-like (LOC106870290), transcript variant X5, mRNA	--	--	--	--	--	--	--	--	--	--	--	--	--	--	--	--	--
Cluster-58773.108998	0.975214	29.2451	-4.9063	0.025062	1198	--	--	--	--	--	--	--	--	--	--	--	--	--	--	--	--	--	--	--	--	--	--	--	--	--
Cluster-58773.210987	63.6282	175.327	-1.4623	0.025358	548	301622334	XP_002940494.1	6.8e-58	PREDICTED: acid ceramidase [Xenopus (Silurana) tropicalis]	961114888	XM_014924830.1	0	PREDICTED: Octopus bimaculoides acid ceramidase-like (LOC106876330), mRNA	K12348	ASAH1	acid ceramidase	http://www.genome.jp/dbget-bin/www_bget?ko:K12348	Q6P7S1	1.5e-52	Acid ceramidase OS=Rattus norvegicus GN=Asah1 PE=2 SV=1	PF03091	CutA1 divalent ion tolerance protein	GO:0010038	response to metal ion	--	--	--	--	--	--
Cluster-58773.208636	23.8059	76.0859	-1.6763	0.026166	1274	--	--	--	--	961083415	XM_014913851.1	5.85718e-67	PREDICTED: Octopus bimaculoides interleukin 17-like protein (LOC106868545), mRNA	--	--	--	--	--	--	--	--	--	--	--	--	--	--	--	--	--
Cluster-58773.7218	1.88211	14.4722	-2.9429	0.026315	943	--	--	--	--	--	--	--	--	--	--	--	--	--	--	--	--	--	--	--	--	--	--	--	--	--
Cluster-58773.40124	12.4936	68.2592	-2.4498	0.026315	3938	871255576	XP_012942136.1	3e-171	PREDICTED: uncharacterized protein LOC106012772 [Aplysia californica]	961087834	XM_014915415.1	0	PREDICTED: Octopus bimaculoides uncharacterized LOC106869607 (LOC106869607), mRNA	--	--	--	--	Q9UYB2	4.8e-07	Threonylcarbamoyl-AMP synthase OS=Pyrococcus abyssi (strain GE5 / Orsay) GN=sua5 PE=1 SV=1	PF01300	Telomere recombination	--	--	GO:0003725	double-stranded RNA binding	--	--	--	--
Cluster-58773.158385	172.586	417.216	-1.2735	0.026531	1495	763431335	AJQ21514.1	1.2e-16	interferon regulatory factor 5/8-like 1 [Mytilus galloprovincialis]	961133146	XM_014931237.1	0	PREDICTED: Octopus bimaculoides interferon regulatory factor 1-like (LOC106881036), transcript variant X3, mRNA	--	--	--	--	Q14653	1.9e-12	Interferon regulatory factor 3 OS=Homo sapiens GN=IRF3 PE=1 SV=1	PF03166//PF00605//PF10401	MH2 domain//Interferon regulatory factor transcription factor//Interferon-regulatory factor 3	GO:0006355	regulation of transcription, DNA-templated	GO:0000975//GO:0003700	regulatory region DNA binding//transcription factor activity, sequence-specific DNA binding	GO:0005667//GO:0005622	transcription factor complex//intracellular	--	--
Cluster-58773.207699	33.4634	101.824	-1.6054	0.026757	291	--	--	--	--	--	--	--	--	--	--	--	--	--	--	--	--	--	--	--	--	--	--	--	--	--
Cluster-58773.98460	4.52389	25.6585	-2.5038	0.026843	267	--	--	--	--	--	--	--	--	--	--	--	--	--	--	--	PF00319	SRF-type transcription factor (DNA-binding and dimerisation domain)	--	--	GO:0046983//GO:0003677	protein dimerization activity//DNA binding	--	--	--	--
Cluster-58773.194032	146.736	449.303	-1.6145	0.027263	942	--	--	--	--	--	--	--	--	--	--	--	--	--	--	--	PF02459	Adenoviral DNA terminal protein	GO:0006260	DNA replication	GO:0003677	DNA binding	--	--	--	--
Cluster-58773.194150	0.0001	30.2077	-18.2046	0.027307	3989	145539868	XP_001455624.1	1e-06	hypothetical protein [Paramecium tetraurelia strain d4-2]>gi|124423432|emb|CAK88227.1| unnamed protein product [Paramecium tetraurelia]	961140953	XM_014933946.1	0	PREDICTED: Octopus bimaculoides oral-facial-digital syndrome 1 protein homolog (LOC106883071), transcript variant X4, mRNA	--	--	--	--	Q8CHG3	1.4e-06	GRIP and coiled-coil domain-containing protein 2 OS=Mus musculus GN=Gcc2 PE=1 SV=2	PF00530//PF01783//PF00641	Scavenger receptor cysteine-rich domain//Ribosomal L32p protein family//Zn-finger in Ran binding protein and others	GO:0006412//GO:0007165//GO:0042254	translation//signal transduction//ribosome biogenesis	GO:0003735//GO:0005044//GO:0008270	structural constituent of ribosome//scavenger receptor activity//zinc ion binding	GO:0016020//GO:0005840//GO:0015934	membrane//ribosome//large ribosomal subunit	--	--
Cluster-58773.147967	49.5156	136.695	-1.465	0.027407	1743	831285220	XP_012673869.1	4.5e-39	PREDICTED: uncharacterized protein LOC105892176 [Clupea harengus]	--	--	--	--	--	--	--	--	--	--	--	--	--	--	--	--	--	--	--	--	--
Cluster-58773.229519	102.487	335.594	-1.7113	0.027411	385	--	--	--	--	961115083	XR_001410244.1	5.61921e-112	PREDICTED: Octopus bimaculoides uncharacterized LOC106876400 (LOC106876400), ncRNA	--	--	--	--	--	--	--	--	--	--	--	--	--	--	--	--	--
Cluster-58773.197407	146.012	1091.61	-2.9023	0.027418	971	675877306	XP_009024213.1	8.2e-06	hypothetical protein HELRODRAFT_177819 [Helobdella robusta]>gi|555694525|gb|ESN97757.1| hypothetical protein HELRODRAFT_177819 [Helobdella robusta]	--	--	--	--	--	--	--	--	--	--	--	PF08027//PF01607	Albumin I chain b//Chitin binding Peritrophin-A domain	GO:0006030//GO:0009405	chitin metabolic process//pathogenesis	GO:0045735//GO:0008061	nutrient reservoir activity//chitin binding	GO:0005576	extracellular region	--	--
Cluster-58773.184499	42.0591	116.152	-1.4655	0.027474	831	4433546	AAD20808.1	2.4e-107	5-aminolevulinate synthase [Sepia officinalis]	961118234	XM_014926062.1	0	PREDICTED: Octopus bimaculoides 5-aminolevulinate synthase, erythroid-specific, mitochondrial-like (LOC106877209), transcript variant X4, mRNA	--	--	--	--	Q9XT75	2.1e-90	5-aminolevulinate synthase, erythroid-specific, mitochondrial OS=Delphinapterus leucas GN=ALAS2 PE=2 SV=1	PF00155	Aminotransferase class I and II	GO:0009058	biosynthetic process	GO:0030170	pyridoxal phosphate binding	--	--	KOG1360	5-aminolevulinate synthase
Cluster-58773.114693	219.164	545.758	-1.3163	0.02754	483	676484286	XP_009063297.1	9.9e-37	hypothetical protein LOTGIDRAFT_235629 [Lottia gigantea]>gi|556097398|gb|ESO86050.1| hypothetical protein LOTGIDRAFT_235629 [Lottia gigantea]	961068114	XM_014912076.1	0	PREDICTED: Octopus bimaculoides uncharacterized LOC106867257 (LOC106867257), mRNA	--	--	--	--	--	--	--	--	--	--	--	--	--	--	--	--	--
Cluster-58773.78784	3.43216	21.7187	-2.6618	0.027591	3038	871266432	XP_005109621.2	6e-79	PREDICTED: solute carrier organic anion transporter family member 2A1-like [Aplysia californica]	961141132	XM_014934007.1	0	PREDICTED: Octopus bimaculoides solute carrier organic anion transporter family member 1B1-like (LOC106883112), transcript variant X2, mRNA	--	--	--	--	Q9Y6L6	6.6e-57	Solute carrier organic anion transporter family member 1B1 OS=Homo sapiens GN=SLCO1B1 PE=1 SV=2	PF02687//PF07690//PF01578//PF07648//PF03137	FtsX-like permease family//Major Facilitator Superfamily//Cytochrome C assembly protein//Kazal-type serine protease inhibitor domain//Organic Anion Transporter Polypeptide (OATP) family	GO:0055085//GO:0017004//GO:0006810	transmembrane transport//cytochrome complex assembly//transport	GO:0005215//GO:0020037//GO:0005515	transporter activity//heme binding//protein binding	GO:0016020//GO:0016021	membrane//integral component of membrane	KOG3626	Organic anion transporter
Cluster-58773.86416	1286.21	2298.37	-0.83748	0.027932	2377	676478671	XP_009061503.1	1.5e-21	hypothetical protein LOTGIDRAFT_166205 [Lottia gigantea]>gi|556099250|gb|ESO87902.1| hypothetical protein LOTGIDRAFT_166205 [Lottia gigantea]	961076520	XM_014935462.1	0	PREDICTED: Octopus bimaculoides uncharacterized LOC106884213 (LOC106884213), mRNA	--	--	--	--	--	--	--	PF00811//PF02714//PF01080//PF08031//PF06978	Ependymin//Calcium-dependent channel, 7TM region, putative phosphate//Presenilin//Berberine and berberine like//Ribonucleases P/MRP protein subunit POP1	GO:0008033//GO:0001682//GO:0051252//GO:0007160//GO:0055114	tRNA processing//tRNA 5'-leader removal//regulation of RNA metabolic process//cell-matrix adhesion//oxidation-reduction process	GO:0004526//GO:0005509//GO:0016491//GO:0050660//GO:0004190	ribonuclease P activity//calcium ion binding//oxidoreductase activity//flavin adenine dinucleotide binding//aspartic-type endopeptidase activity	GO:0030677//GO:0005576//GO:0016020//GO:0016021	ribonuclease P complex//extracellular region//membrane//integral component of membrane	--	--
Cluster-58773.178704	25.8591	80.3749	-3.1524	0.027961	3684	--	--	--	--	961078535	XM_014912177.1	8.67012e-10	PREDICTED: Octopus bimaculoides protein RD3-like (LOC106867333), transcript variant X2, mRNA	--	--	--	--	--	--	--	--	--	GO:0009058	biosynthetic process	GO:0030170	pyridoxal phosphate binding	--	--	--	--
Cluster-58773.184495	11.9985	106.683	-1.6361	0.027961	427	4433546	AAD20808.1	3.7e-67	5-aminolevulinate synthase [Sepia officinalis]	961118234	XM_014926062.1	0	PREDICTED: Octopus bimaculoides 5-aminolevulinate synthase, erythroid-specific, mitochondrial-like (LOC106877209), transcript variant X4, mRNA	--	--	--	--	P07997	4.2e-50	5-aminolevulinate synthase, nonspecific, mitochondrial OS=Gallus gallus GN=ALAS1 PE=2 SV=2	PF00155//PF01053	Aminotransferase class I and II//Cys/Met metabolism PLP-dependent enzyme	--	--	--	--	--	--	KOG1360	5-aminolevulinate synthase
Cluster-58773.176158	357.905	731.53	-1.0313	0.027961	1718	762084636	XP_011424815.1	2.7e-52	PREDICTED: acyl-CoA synthetase family member 2, mitochondrial-like [Crassostrea gigas]>gi|405977330|gb|EKC41787.1| Acyl-CoA synthetase family member 2, mitochondrial [Crassostrea gigas]	961075087	XM_014934984.1	0	PREDICTED: Octopus bimaculoides acyl-CoA synthetase family member 2, mitochondrial-like (LOC106883846), mRNA	--	--	--	--	Q17QJ1	2.3e-30	Acyl-CoA synthetase family member 2, mitochondrial OS=Bos taurus GN=ACSF2 PE=2 SV=1	PF00501	AMP-binding enzyme	GO:0008152	metabolic process	GO:0003824	catalytic activity	--	--	KOG1176	Acyl-CoA synthetase
Cluster-58773.98597	5.11295	45.2911	-3.147	0.027989	398	291224559	XP_002732271.1	1.6e-08	PREDICTED: methylmalonic aciduria and homocystinuria type C protein homolog [Saccoglossus kowalevskii]	961121792	XM_014927279.1	2.54369e-155	PREDICTED: Octopus bimaculoides methylmalonic aciduria and homocystinuria type C protein homolog (LOC106878149), mRNA	--	--	--	--	Q5ZL21	6.3e-08	Methylmalonic aciduria and homocystinuria type C protein homolog OS=Gallus gallus GN=MMACHC PE=2 SV=1	--	--	--	--	--	--	--	--	--	--
Cluster-58773.213944	0.0001	25.0883	-17.9367	0.028071	2985	--	--	--	--	961141239	XR_001411081.1	1.51714e-06	PREDICTED: Octopus bimaculoides uncharacterized LOC106883144 (LOC106883144), ncRNA	--	--	--	--	--	--	--	PF01392	Fz domain	--	--	GO:0005515	protein binding	--	--	--	--
Cluster-58773.161158	58.5466	157.212	-1.4251	0.028192	832	548506534	XP_005693144.1	1.7e-07	PREDICTED: hepatic leukemia factor [Capra hircus]	961104152	XM_014921042.1	1.17816e-166	PREDICTED: Octopus bimaculoides thyrotroph embryonic factor-like (LOC106873604), transcript variant X1, mRNA	--	--	--	--	Q16534	1.7e-07	Hepatic leukemia factor OS=Homo sapiens GN=HLF PE=2 SV=1	PF10717//PF05739//PF00945//PF00377//PF00957	Occlusion-derived virus envelope protein ODV-E18//SNARE domain//Rhabdovirus nucleocapsid protein//Prion/Doppel alpha-helical domain//Synaptobrevin	GO:0051260//GO:0016192	protein homooligomerization//vesicle-mediated transport	GO:0005515	protein binding	GO:0019013//GO:0016020//GO:0019031//GO:0016021	viral nucleocapsid//membrane//viral envelope//integral component of membrane	--	--
Cluster-58773.38747	90.0006	278.874	-1.6316	0.028304	1091	762139044	XP_011452862.1	3.7e-07	PREDICTED: proline-rich transmembrane protein 1-like [Crassostrea gigas]	961076499	XM_014935454.1	0	PREDICTED: Octopus bimaculoides putative transmembrane protein DDB_G0267530 (LOC106884206), mRNA	--	--	--	--	--	--	--	PF04505	Interferon-induced transmembrane protein	GO:0009607	response to biotic stimulus	--	--	GO:0016021	integral component of membrane	--	--
Cluster-58773.233735	1.77485	27.9094	-3.975	0.029052	1874	761909844	XP_011404302.1	1.8e-46	PREDICTED: deleted in malignant brain tumors 1 protein-like [Amphimedon queenslandica]	961075118	XM_014934993.1	5.01475e-94	PREDICTED: Octopus bimaculoides scavenger receptor cysteine-rich type 1 protein M130-like (LOC106883854), mRNA	--	--	--	--	Q5G271	1.4e-44	Neurotrypsin OS=Pan troglodytes GN=PRSS12 PE=3 SV=1	PF15494//PF00530	Scavenger receptor cysteine-rich domain//Scavenger receptor cysteine-rich domain	GO:0007165	signal transduction	GO:0005044	scavenger receptor activity	GO:0016020	membrane	--	--
Cluster-58773.203210	1.81992	17.5489	-3.2694	0.029052	1531	--	--	--	--	--	--	--	--	--	--	--	--	--	--	--	--	--	--	--	--	--	--	--	--	--
Cluster-58773.111010	254.816	981.688	-1.9458	0.029919	1088	676454209	XP_009053606.1	8.4e-84	hypothetical protein LOTGIDRAFT_116769, partial [Lottia gigantea]>gi|556107106|gb|ESO95758.1| hypothetical protein LOTGIDRAFT_116769, partial [Lottia gigantea]	961141512	XM_014934134.1	0	PREDICTED: Octopus bimaculoides uncharacterized LOC106883213 (LOC106883213), mRNA	--	--	--	--	--	--	--	PF01522	Polysaccharide deacetylase	GO:0005975//GO:0006807	carbohydrate metabolic process//nitrogen compound metabolic process	GO:0016810	hydrolase activity, acting on carbon-nitrogen (but not peptide) bonds	--	--	--	--
Cluster-58773.145763	10.0456	51.1505	-2.3482	0.030545	825	524915697	XP_005112640.1	4.8e-39	PREDICTED: cytochrome P450 3A24-like [Aplysia californica]>gi|524915699|ref|XP_005112641.1| PREDICTED: cytochrome P450 3A24-like [Aplysia californica]	961084570	XM_014914256.1	0	PREDICTED: Octopus bimaculoides cytochrome P450 3A31-like (LOC106868827), transcript variant X3, mRNA	--	--	--	--	O70537	6.2e-34	Cytochrome P450 3A31 OS=Mesocricetus auratus GN=CYP3A31 PE=2 SV=1	PF01445//PF00067	Viral small hydrophobic protein//Cytochrome P450	GO:0055114	oxidation-reduction process	GO:0020037//GO:0016705//GO:0005506	heme binding//oxidoreductase activity, acting on paired donors, with incorporation or reduction of molecular oxygen//iron ion binding	GO:0016020	membrane	KOG0158	Cytochrome P450 CYP3/CYP5/CYP6/CYP9 subfamilies
Cluster-58773.157034	94.8484	227.226	-1.2604	0.03094	580	443688127	ELT90904.1	6.4e-14	hypothetical protein CAPTEDRAFT_121853 [Capitella teleta]	961109887	XM_014923026.1	0	PREDICTED: Octopus bimaculoides neuroendocrine convertase 1-like (LOC106875064), mRNA	--	--	--	--	P28840	1.5e-10	Neuroendocrine convertase 1 OS=Rattus norvegicus GN=Pcsk1 PE=2 SV=1	PF01483	Proprotein convertase P-domain	GO:0006508	proteolysis	GO:0004252	serine-type endopeptidase activity	--	--	KOG3525	Subtilisin-like proprotein convertase
Cluster-58773.142740	175.757	378.546	-1.1069	0.031427	2154	--	--	--	--	--	--	--	--	--	--	--	--	--	--	--	--	--	--	--	--	--	--	--	--	--
Cluster-58773.166898	1789.05	3116.81	-0.80088	0.031454	3117	830116562	XP_004689810.2	0	PREDICTED: dihydropyrimidine dehydrogenase [NADP(+)] isoform X2 [Condylura cristata]	961139722	XM_014933518.1	0	PREDICTED: Octopus bimaculoides dihydropyrimidine dehydrogenase [NADP(+)]-like (LOC106882744), mRNA	K00207	DPYD	dihydropyrimidine dehydrogenase (NADP+)	http://www.genome.jp/dbget-bin/www_bget?ko:K00207	Q12882	0	Dihydropyrimidine dehydrogenase [NADP(+)] OS=Homo sapiens GN=DPYD PE=1 SV=2	PF06467//PF00070//PF01180//PF00695//PF07992//PF01207//PF01884	MYM-type Zinc finger with FCS sequence motif//Pyridine nucleotide-disulphide oxidoreductase//Dihydroorotate dehydrogenase//Major surface antigen from hepadnavirus//Pyridine nucleotide-disulphide oxidoreductase//Dihydrouridine synthase (Dus)//PcrB family	GO:0055114//GO:0016032//GO:0008033	oxidation-reduction process//viral process//tRNA processing	GO:0016765//GO:0008270//GO:0017150//GO:0016627//GO:0050660//GO:0016491	transferase activity, transferring alkyl or aryl (other than methyl) groups//zinc ion binding//tRNA dihydrouridine synthase activity//oxidoreductase activity, acting on the CH-CH group of donors//flavin adenine dinucleotide binding//oxidoreductase activity	GO:0005737	cytoplasm	KOG0399	Glutamate synthase
Cluster-58773.167641	84.1295	204.471	-1.2812	0.032253	3860	676429230	XP_009045532.1	1.5e-90	hypothetical protein LOTGIDRAFT_156660 [Lottia gigantea]>gi|556115398|gb|ESP04050.1| hypothetical protein LOTGIDRAFT_156660 [Lottia gigantea]	961090851	XM_014916466.1	0	PREDICTED: Octopus bimaculoides uncharacterized LOC106870410 (LOC106870410), transcript variant X2, mRNA	K08899	LMTK3	lemur tyrosine kinase 3	http://www.genome.jp/dbget-bin/www_bget?ko:K08899	Q5XJV6	2.6e-58	Serine/threonine-protein kinase LMTK3 OS=Mus musculus GN=Lmtk3 PE=1 SV=1	PF07714//PF00069	Protein tyrosine kinase//Protein kinase domain	GO:0006468	protein phosphorylation	GO:0005524//GO:0004672	ATP binding//protein kinase activity	--	--	KOG1026	Nerve growth factor receptor TRKA and related tyrosine kinases
Cluster-58773.165985	51.6602	146.401	-1.5028	0.032383	1099	--	--	--	--	--	--	--	--	--	--	--	--	--	--	--	--	--	--	--	--	--	--	--	--	--
Cluster-58773.127266	608.056	1112.82	-0.87195	0.033327	625	--	--	--	--	--	--	--	--	--	--	--	--	--	--	--	--	--	--	--	--	--	--	--	--	--
Cluster-58773.18919	5.2798	33.3124	-2.6575	0.034175	507	--	--	--	--	--	--	--	--	--	--	--	--	--	--	--	--	--	--	--	--	--	--	--	--	--
Cluster-58773.87779	1.22953	12.7945	-3.3794	0.034394	1079	--	--	--	--	--	--	--	--	--	--	--	--	--	--	--	--	--	--	--	--	--	--	--	--	--
Cluster-109947.1	187.809	403.532	-1.1034	0.034621	2775	762154219	XP_011415172.1	3.2e-119	PREDICTED: solute carrier organic anion transporter family member 4C1-like isoform X2 [Crassostrea gigas]	961123098	XM_014927742.1	0	PREDICTED: Octopus bimaculoides solute carrier organic anion transporter family member 4A1-like (LOC106878517), mRNA	--	--	--	--	Q8BGD4	1.1e-101	Solute carrier organic anion transporter family member 4C1 OS=Mus musculus GN=Slco4c1 PE=1 SV=1	PF07690//PF03137//PF00487//PF07648//PF00050	Major Facilitator Superfamily//Organic Anion Transporter Polypeptide (OATP) family//Fatty acid desaturase//Kazal-type serine protease inhibitor domain//Kazal-type serine protease inhibitor domain	GO:0006810//GO:0055085//GO:0006629	transport//transmembrane transport//lipid metabolic process	GO:0005215//GO:0005515	transporter activity//protein binding	GO:0016020//GO:0016021	membrane//integral component of membrane	KOG3626	Organic anion transporter
Cluster-58773.169161	30.5903	96.5638	-1.6584	0.03476	2673	668457947	KFB45916.1	6.9e-63	hypothetical protein ZHAS_00013879 [Anopheles sinensis]	961080265	XM_014912772.1	0	PREDICTED: Octopus bimaculoides spondin-1-like (LOC106867785), transcript variant X2, mRNA	--	--	--	--	Q8BMS2	1.9e-47	Spondin-2 OS=Mus musculus GN=Spon2 PE=2 SV=2	--	--	--	--	--	--	--	--	--	--
Cluster-58773.99910	120.27	287.596	-1.2578	0.034764	2011	676476535	XP_009060824.1	2.6e-155	hypothetical protein LOTGIDRAFT_219163 [Lottia gigantea]>gi|556099762|gb|ESO88414.1| hypothetical protein LOTGIDRAFT_219163 [Lottia gigantea]	961098591	XM_014919097.1	0	PREDICTED: Octopus bimaculoides sodium-dependent proline transporter-like (LOC106872196), transcript variant X3, mRNA	--	--	--	--	Q6PGE7	1.5e-118	Sodium-dependent proline transporter OS=Mus musculus GN=Slc6a7 PE=1 SV=1	PF00209	Sodium:neurotransmitter symporter family	GO:0006836//GO:0006812	neurotransmitter transport//cation transport	GO:0005328	neurotransmitter:sodium symporter activity	GO:0016021	integral component of membrane	KOG3660	Sodium-neurotransmitter symporter
Cluster-58773.39610	64.0475	184.842	-1.5291	0.034906	788	762110629	XP_011438011.1	8e-36	PREDICTED: A disintegrin and metalloproteinase with thrombospondin motifs 6-like isoform X2 [Crassostrea gigas]	961067758	XM_014933311.1	0	PREDICTED: Octopus bimaculoides A disintegrin and metalloproteinase with thrombospondin motifs 12-like (LOC106882557), mRNA	--	--	--	--	P79331	2.2e-20	A disintegrin and metalloproteinase with thrombospondin motifs 2 OS=Bos taurus GN=ADAMTS2 PE=1 SV=1	PF03419//PF05297	Sporulation factor SpoIIGA//Herpesvirus latent membrane protein 1 (LMP1)	GO:0019087//GO:0006508//GO:0030436	transformation of host cell by virus//proteolysis//asexual sporulation	GO:0004190	aspartic-type endopeptidase activity	GO:0016021	integral component of membrane	KOG3538	Disintegrin metalloproteinases with thrombospondin repeats
Cluster-58773.100142	11.6008	49.1278	-17.9085	0.035054	1079	--	--	--	--	--	--	--	--	--	--	--	--	--	--	--	--	--	GO:0006030	chitin metabolic process	GO:0008061	chitin binding	GO:0005576	extracellular region	--	--
Cluster-58773.114933	0.0001	24.6039	-2.0823	0.035054	1101	405957975	EKC24149.1	8.4e-07	Vitrin [Crassostrea gigas]	--	--	--	--	--	--	--	--	--	--	--	PF01607	Chitin binding Peritrophin-A domain	--	--	--	--	--	--	--	--
Cluster-58773.171965	227.821	606.34	-1.4122	0.035156	1455	66730479	NP_001019403.1	7.9e-37	cytochrome P450, family 3, subfamily a, polypeptide 62 [Rattus norvegicus]>gi|24898925|dbj|BAC23085.1| cytochrome P450 3A [Rattus norvegicus]	961084563	XM_014914254.1	0	PREDICTED: Octopus bimaculoides cytochrome P450 3A31-like (LOC106868827), transcript variant X1, mRNA	--	--	--	--	Q64417	1.5e-35	Cytochrome P450 3A14 OS=Cavia porcellus GN=CYP3A14 PE=2 SV=2	PF01687//PF00067	Riboflavin kinase//Cytochrome P450	GO:0009231//GO:0055114	riboflavin biosynthetic process//oxidation-reduction process	GO:0005506//GO:0008531//GO:0016705//GO:0020037	iron ion binding//riboflavin kinase activity//oxidoreductase activity, acting on paired donors, with incorporation or reduction of molecular oxygen//heme binding	--	--	KOG0158	Cytochrome P450 CYP3/CYP5/CYP6/CYP9 subfamilies
Cluster-58773.164077	4390.97	6986.57	-0.67004	0.035172	2338	762070867	XP_011424185.1	5.9e-268	PREDICTED: phosphoenolpyruvate carboxykinase, cytosolic [GTP]-like isoform X1 [Crassostrea gigas]>gi|405961262|gb|EKC27094.1| Phosphoenolpyruvate carboxykinase, cytosolic [GTP] [Crassostrea gigas]	961085126	XM_014914451.1	0	PREDICTED: Octopus bimaculoides phosphoenolpyruvate carboxykinase, cytosolic [GTP]-like (LOC106868970), mRNA	--	--	--	--	P05153	1.3e-254	Phosphoenolpyruvate carboxykinase, cytosolic [GTP] OS=Gallus gallus GN=PCK1 PE=2 SV=1	PF00957//PF00821//PF05823//PF05434//PF12937//PF03073	Synaptobrevin//Phosphoenolpyruvate carboxykinase//Nematode fatty acid retinoid binding protein (Gp-FAR-1)//TMEM9//F-box-like//TspO/MBR family	GO:0006094//GO:0016192	gluconeogenesis//vesicle-mediated transport	GO:0005525//GO:0004611//GO:0008289//GO:0005515	GTP binding//phosphoenolpyruvate carboxykinase activity//lipid binding//protein binding	GO:0016021	integral component of membrane	--	--
Cluster-58773.108734	73.7349	208.184	-1.4974	0.035232	991	66865864	AAU11487.2	7.6e-15	ETS-family transcription factor [Azumapecten farreri]	961088348	XM_014915593.1	0	PREDICTED: Octopus bimaculoides transcription factor ETV6-like (LOC106869737), mRNA	--	--	--	--	--	--	--	PF16954//PF02198	Haem-transporter, endosomal/lysosomal, haem-responsive gene//Sterile alpha motif (SAM)/Pointed domain	GO:0015886	heme transport	GO:0043565//GO:0015232	sequence-specific DNA binding//heme transporter activity	GO:0005634	nucleus	--	--
Cluster-58773.101606	652.815	1234.84	-1.0349	0.035261	1193	780076127	XP_011672198.1	1.5e-78	PREDICTED: deleted in malignant brain tumors 1 protein-like isoform X2 [Strongylocentrotus purpuratus]	961118518	XM_014926157.1	3.34161e-54	PREDICTED: Octopus bimaculoides neurotrypsin-like (LOC106877287), partial mRNA	--	--	--	--	Q5G267	3.4e-73	Neurotrypsin OS=Macaca mulatta GN=PRSS12 PE=3 SV=1	PF09272//PF15494//PF00530	Hepsin, SRCR//Scavenger receptor cysteine-rich domain//Scavenger receptor cysteine-rich domain	GO:0006886//GO:0016192//GO:0009405	intracellular protein transport//vesicle-mediated transport//pathogenesis	GO:0005515	protein binding	GO:0005576//GO:0030131//GO:0030117	extracellular region//clathrin adaptor complex//membrane coat	--	--
Cluster-58773.185275	1491.63	3056.21	-0.91958	0.035261	3980	762097545	XP_011431346.1	0	PREDICTED: AP-1 complex subunit beta-1-like [Crassostrea gigas]>gi|405971077|gb|EKC35933.1| AP-2 complex subunit beta [Crassostrea gigas]	961094228	XM_014917627.1	0	PREDICTED: Octopus bimaculoides AP-1 complex subunit beta-1-like (LOC106871264), transcript variant X3, mRNA	K12392	AP1B1	AP-1 complex subunit beta-1	http://www.genome.jp/dbget-bin/www_bget?ko:K12392	O35643	0	AP-1 complex subunit beta-1 OS=Mus musculus GN=Ap1b1 PE=1 SV=2	PF02883//PF01602//PF08115//PF00514//PF02985//PF09066	Adaptin C-terminal domain//Adaptin N terminal region//SFI toxin family//Armadillo/beta-catenin-like repeat//HEAT repeat//Beta2-adaptin appendage, C-terminal sub-domain	GO:0007165	signal transduction	GO:0004252//GO:0070008//GO:0005044	serine-type endopeptidase activity//serine-type exopeptidase activity//scavenger receptor activity	GO:0016020	membrane	KOG1061	Vesicle coat complex AP-1/AP-2/AP-4, beta subunit
Cluster-58773.102126	72.4748	177.98	-2.0447	0.035568	3920	762115563	XP_011440588.1	1e-187	PREDICTED: rap guanine nucleotide exchange factor 1-like isoform X1 [Crassostrea gigas]	961130725	XM_014930383.1	0	PREDICTED: Octopus bimaculoides rap guanine nucleotide exchange factor 1-like (LOC106880457), transcript variant X4, mRNA	--	--	--	--	Q13905	2.5e-125	Rap guanine nucleotide exchange factor 1 OS=Homo sapiens GN=RAPGEF1 PE=1 SV=3	PF00617	RasGEF domain	GO:0006310//GO:0006355//GO:0006352	DNA recombination//regulation of transcription, DNA-templated//DNA-templated transcription, initiation	GO:0016987//GO:0003700//GO:0000150//GO:0003677	sigma factor activity//transcription factor activity, sequence-specific DNA binding//recombinase activity//DNA binding	GO:0005667	transcription factor complex	KOG3417	Ras1 guanine nucleotide exchange factor
Cluster-58773.144356	14.1369	58.3273	-1.2962	0.035568	826	594087760	XP_006067346.1	1.1e-08	PREDICTED: tigger transposable element-derived protein 1-like isoform X1 [Bubalus bubalis]>gi|594087762|ref|XP_006067347.1| PREDICTED: tigger transposable element-derived protein 1-like isoform X2 [Bubalus bubalis]>gi|594087764|ref|XP_006067348.1| PREDICTED: tigger transposable element-derived protein 1-like isoform X3 [Bubalus bubalis]>gi|594087766|ref|XP_006067349.1| PREDICTED: tigger transposa…	961079355	XR_001409159.1	1.2729e-106	PREDICTED: Octopus bimaculoides zinc finger protein 726-like (LOC106867550), transcript variant X1, misc_RNA	--	--	--	--	--	--	--	PF04218//PF02796//PF04545//PF09339//PF00356	CENP-B N-terminal DNA-binding domain//Helix-turn-helix domain of resolvase//Sigma-70, region 4//IclR helix-turn-helix domain//Bacterial regulatory proteins, lacI family	GO:0007264//GO:0043087	small GTPase mediated signal transduction//regulation of GTPase activity	GO:0005085	guanyl-nucleotide exchange factor activity	--	--	--	--
Cluster-58773.148732	1311.37	2526.47	-0.94605	0.035748	1961	762144498	XP_011455518.1	2.2e-98	PREDICTED: uncharacterized protein LOC105347952 [Crassostrea gigas]	961136705	XM_014932465.1	0	PREDICTED: Octopus bimaculoides alcohol dehydrogenase-like (LOC106881937), mRNA	--	--	--	--	P42328	9.6e-09	Alcohol dehydrogenase OS=Geobacillus stearothermophilus PE=1 SV=1	PF13545//PF00899//PF00107//PF08240	Crp-like helix-turn-helix domain//ThiF family//Zinc-binding dehydrogenase//Alcohol dehydrogenase GroES-like domain	GO:0055114//GO:0006355	oxidation-reduction process//regulation of transcription, DNA-templated	GO:0008641//GO:0003677	small protein activating enzyme activity//DNA binding	--	--	--	--
Cluster-58773.114695	1940.25	3245.35	-1.7558	0.035859	239	--	--	--	--	961068114	XM_014912076.1	3.35906e-97	PREDICTED: Octopus bimaculoides uncharacterized LOC106867257 (LOC106867257), mRNA	--	--	--	--	--	--	--	PF02533	Photosystem II 4 kDa reaction centre component	GO:0006420//GO:0006525//GO:0006560//GO:0007218	arginyl-tRNA aminoacylation//arginine metabolic process//proline metabolic process//neuropeptide signaling pathway	GO:0005524//GO:0004814	ATP binding//arginine-tRNA ligase activity	--	--	--	--
Cluster-58773.162185	21.8051	73.6387	-0.74213	0.035859	2257	322518585	B6E465.1	3.2e-85	RecName: Full=FMRFamide-related neuropeptides; Contains: RecName: Full=FIRF-amide; Contains: RecName: Full=ALSGDAFLRF-amide; Contains: RecName: Full=FLRF-amide; Contains: RecName: Full=FMRF-amide 1; Contains: RecName: Full=FMRF-amide 2; Contains: RecName: Full=FMRF-amide 3; Contains: RecName: Full=FMRF-amide 4; Contains: RecName: Full=FMRF-amide 5; Contains: RecName: Full=FMRF-amide 6; Contains: …	961102435	XM_014920442.1	0	PREDICTED: Octopus bimaculoides FMRFamide-related neuropeptides-like (LOC106873202), transcript variant X1, mRNA	--	--	--	--	B6E465	1.3e-86	FMRFamide-related neuropeptides OS=Doryteuthis pealeii GN=FMRFa PE=2 SV=1	PF01581//PF00750	FMRFamide related peptide family//tRNA synthetases class I (R)	GO:0015979	photosynthesis	--	--	GO:0009539//GO:0009523	photosystem II reaction center//photosystem II	--	--
Cluster-58773.121345	1.71576	16.0806	-5.0086	0.035973	1224	--	--	--	--	--	--	--	--	--	--	--	--	--	--	--	--	--	GO:0019835//GO:0009405//GO:0009395	cytolysis//pathogenesis//phospholipid catabolic process	GO:0005515//GO:0004620	protein binding//phospholipase activity	GO:0019867	outer membrane	--	--
Cluster-58773.34812	1750.02	3057.33	-3.2284	0.035973	2821	762124560	XP_011445297.1	5.8e-145	PREDICTED: cytosolic phospholipase A2-like isoform X3 [Crassostrea gigas]	961115930	XM_014925258.1	0	PREDICTED: Octopus bimaculoides cytosolic phospholipase A2-like (LOC106876643), transcript variant X2, mRNA	--	--	--	--	Q5R8A5	5.1e-96	Cytosolic phospholipase A2 OS=Pongo abelii GN=PLA2G4A PE=2 SV=1	PF01735//PF02402//PF00168	Lysophospholipase catalytic domain//Lysis protein//C2 domain	GO:0006098//GO:0019521//GO:0055114	pentose-phosphate shunt//D-gluconate metabolic process//oxidation-reduction process	GO:0004616//GO:0050661//GO:0051287	phosphogluconate dehydrogenase (decarboxylating) activity//NADP binding//NAD binding	--	--	--	--
Cluster-58773.111552	953.831	1967.16	-2.1513	0.035973	1439	--	--	--	--	961137382	XM_014932698.1	2.23991e-111	PREDICTED: Octopus bimaculoides choline dehydrogenase, mitochondrial-like (LOC106882133), mRNA	--	--	--	--	--	--	--	PF06703	Microsomal signal peptidase 25 kDa subunit (SPC25)	GO:0007165//GO:0006810	signal transduction//transport	GO:0005215//GO:0008158	transporter activity//hedgehog receptor activity	GO:0016020	membrane	--	--
Cluster-58773.220446	0.562921	18.1211	-1.0443	0.035973	4211	524881653	XP_005097476.1	0	PREDICTED: Niemann-Pick C1 protein-like [Aplysia californica]	961087881	XM_014915431.1	0	PREDICTED: Octopus bimaculoides Niemann-Pick C1 protein-like (LOC106869623), mRNA	--	--	--	--	P56941	0	Niemann-Pick C1 protein OS=Sus scrofa GN=NPC1 PE=2 SV=1	PF00873//PF02460	AcrB/AcrD/AcrF family//Patched family	--	--	--	--	--	--	KOG1933	Cholesterol transport protein (Niemann-Pick C disease protein)
Cluster-58773.224149	7.53625	33.4774	-0.8049	0.035973	2051	762136897	XP_011451733.1	6.2e-213	PREDICTED: 6-phosphogluconate dehydrogenase, decarboxylating-like [Crassostrea gigas]>gi|405976318|gb|EKC40830.1| 6-phosphogluconate dehydrogenase, decarboxylating [Crassostrea gigas]	961113865	XM_014924409.1	0	PREDICTED: Octopus bimaculoides 6-phosphogluconate dehydrogenase, decarboxylating-like (LOC106876031), mRNA	--	--	--	--	P52209	5.8e-206	6-phosphogluconate dehydrogenase, decarboxylating OS=Homo sapiens GN=PGD PE=1 SV=3	PF00393//PF14833//PF03446	6-phosphogluconate dehydrogenase, C-terminal domain//NAD-binding of NADP-dependent 3-hydroxyisobutyrate dehydrogenase//NAD binding domain of 6-phosphogluconate dehydrogenase	GO:0006465	signal peptide processing	GO:0008233	peptidase activity	GO:0016021//GO:0005787	integral component of membrane//signal peptidase complex	KOG2653	6-phosphogluconate dehydrogenase
Cluster-58773.182470	7.19975	34.3444	-2.2541	0.036859	3549	676493172	XP_009066153.1	2.9e-282	hypothetical protein LOTGIDRAFT_179801 [Lottia gigantea]>gi|556094550|gb|ESO83203.1| hypothetical protein LOTGIDRAFT_179801 [Lottia gigantea]	961140209	XM_014933685.1	0	PREDICTED: Octopus bimaculoides arf-GAP with SH3 domain, ANK repeat and PH domain-containing protein 2-like (LOC106882879), mRNA	--	--	--	--	O97902	3.2e-204	Arf-GAP with SH3 domain, ANK repeat and PH domain-containing protein 1 OS=Bos taurus GN=ASAP1 PE=1 SV=1	PF03306//PF14604//PF00023//PF01412//PF13606//PF00018//PF08397//PF03114	Alpha-acetolactate decarboxylase//Variant SH3 domain//Ankyrin repeat//Putative GTPase activating protein for Arf//Ankyrin repeat//SH3 domain//IRSp53/MIM homology domain//BAR domain	GO:0007009//GO:0045151	plasma membrane organization//acetoin biosynthetic process	GO:0005515//GO:0005096//GO:0047605	protein binding//GTPase activator activity//acetolactate decarboxylase activity	GO:0005737	cytoplasm	KOG0705	GTPase-activating protein Centaurin gamma (contains Ras-like GTPase, PH and ankyrin repeat domains)
Cluster-58773.160657	19.6945	62.8248	-1.6735	0.036859	1976	306489668	ADM94277.1	1.9e-97	glutamine synthetase [Tegillarca granosa]	961112186	XM_014923825.1	0	PREDICTED: Octopus bimaculoides glutamine synthetase-like (LOC106875608), mRNA	--	--	--	--	P16580	4.4e-94	Glutamine synthetase OS=Gallus gallus GN=GLUL PE=1 SV=1	PF08515//PF00120//PF07819	Transforming growth factor beta type I GS-motif//Glutamine synthetase, catalytic domain//PGAP1-like protein	GO:0007178//GO:0016310//GO:0009252//GO:0006505//GO:0006807//GO:0006468//GO:0009069//GO:0006886	transmembrane receptor protein serine/threonine kinase signaling pathway//phosphorylation//peptidoglycan biosynthetic process//GPI anchor metabolic process//nitrogen compound metabolic process//protein phosphorylation//serine family amino acid metabolic process//intracellular protein transport	GO:0004356//GO:0004675//GO:0016788//GO:0005524	glutamate-ammonia ligase activity//transmembrane receptor protein serine/threonine kinase activity//hydrolase activity, acting on ester bonds//ATP binding	GO:0016020	membrane	KOG0683	Glutamine synthetase
Cluster-58773.75828	65.5257	232.865	-1.8294	0.037111	428	--	--	--	--	--	--	--	--	--	--	--	--	--	--	--	--	--	--	--	--	--	--	--	--	--
Cluster-58773.22297	0.0001	25.6328	-17.9676	0.037453	2887	675641960	XP_008979228.1	2e-15	PREDICTED: LOW QUALITY PROTEIN: putative zinc finger protein 724 [Callithrix jacchus]	961095965	XM_014918235.1	0	PREDICTED: Octopus bimaculoides B-cell lymphoma/leukemia 11A-like (LOC106871651), mRNA	--	--	--	--	Q9NSJ1	5.4e-16	Putative zinc finger protein 355P OS=Homo sapiens GN=ZNF355P PE=5 SV=2	PF13465//PF06524//PF00096	Zinc-finger double domain//NOA36 protein//Zinc finger, C2H2 type	--	--	GO:0008270//GO:0046872	zinc ion binding//metal ion binding	GO:0005634	nucleus	--	--
Cluster-58773.208738	0.0001	9.47825	-16.5323	0.037453	3537	676473478	XP_009059830.1	4.8e-72	hypothetical protein LOTGIDRAFT_234307 [Lottia gigantea]>gi|556100817|gb|ESO89469.1| hypothetical protein LOTGIDRAFT_234307 [Lottia gigantea]	961095522	XM_014918084.1	0	PREDICTED: Octopus bimaculoides uncharacterized LOC106871578 (LOC106871578), transcript variant X1, mRNA	--	--	--	--	--	--	--	PF07714//PF00069//PF07851//PF02117//PF07525//PF15221	Protein tyrosine kinase//Protein kinase domain//TMPIT-like protein//Serpentine type 7TM GPCR chemoreceptor Sra//SOCS box//Lens epithelial cell protein LEP503	GO:0007275//GO:0007186//GO:0006468//GO:0035556//GO:0007606	multicellular organismal development//G-protein coupled receptor signaling pathway//protein phosphorylation//intracellular signal transduction//sensory perception of chemical stimulus	GO:0005524//GO:0004672//GO:0004930	ATP binding//protein kinase activity//G-protein coupled receptor activity	GO:0016021	integral component of membrane	KOG0593	Predicted protein kinase KKIAMRE
Cluster-58773.178803	54.391	294.514	-2.4369	0.037453	2572	645004182	XP_008212855.1	9.7e-06	PREDICTED: proline-rich extensin-like protein EPR1 [Nasonia vitripennis]	--	--	--	--	--	--	--	--	--	--	--	PF03092	BT1 family	GO:0006810	transport	--	--	GO:0016021	integral component of membrane	--	--
Cluster-58773.14964	113.384	269.596	-1.2496	0.037453	2522	676483448	XP_009063028.1	1.1e-137	hypothetical protein LOTGIDRAFT_220783 [Lottia gigantea]>gi|556097604|gb|ESO86256.1| hypothetical protein LOTGIDRAFT_220783 [Lottia gigantea]	961108337	XM_014922493.1	0	PREDICTED: Octopus bimaculoides innexin unc-9-like (LOC106874684), transcript variant X6, mRNA	--	--	--	--	O01393	7.1e-73	Innexin unc-9 OS=Caenorhabditis elegans GN=unc-9 PE=2 SV=1	PF00876	Innexin	--	--	--	--	GO:0005921	gap junction	--	--
Cluster-58773.190263	5.84136	34.6465	-2.5683	0.03758	3416	--	--	--	--	961117534	XM_014925817.1	0	PREDICTED: Octopus bimaculoides uncharacterized LOC106877032 (LOC106877032), transcript variant X3, mRNA	--	--	--	--	--	--	--	PF15957//PF00041//PF16519	Commissureless//Fibronectin type III domain//Tetramerisation domain of TRPM	GO:0007411//GO:0051262	axon guidance//protein tetramerization	GO:0005515	protein binding	--	--	--	--
Cluster-58773.138027	150.393	377.906	-1.3293	0.03758	2383	871256598	XP_012942328.1	5e-81	PREDICTED: mitogen-activated protein kinase 14-like [Aplysia californica]	961143407	XM_014934814.1	0	PREDICTED: Octopus bimaculoides mitogen-activated protein kinase 8A-like (LOC106883705), partial mRNA	--	--	--	--	Q17446	6.5e-76	Mitogen-activated protein kinase pmk-1 OS=Caenorhabditis elegans GN=pmk-1 PE=1 SV=1	PF07714//PF00069	Protein tyrosine kinase//Protein kinase domain	GO:0006468	protein phosphorylation	GO:0005524//GO:0004672	ATP binding//protein kinase activity	--	--	KOG0660	Mitogen-activated protein kinase
Cluster-58773.194446	10499.7	17650.1	-0.74933	0.038095	6670	762092217	XP_011428535.1	3.8e-304	PREDICTED: uncharacterized protein LOC105329078 isoform X2 [Crassostrea gigas]	961071461	XM_014923553.1	0	PREDICTED: Octopus bimaculoides collagen alpha-1(XII) chain-like (LOC106875418), mRNA	--	--	--	--	A2AX52	4.7e-116	Collagen alpha-4(VI) chain OS=Mus musculus GN=Col6a4 PE=1 SV=2	PF06061//PF13855//PF01343//PF00093	Baculoviridae ME53//Leucine rich repeat//Peptidase family S49//von Willebrand factor type C domain	GO:0006508	proteolysis	GO:0005515//GO:0008233//GO:0008270//GO:0003677	protein binding//peptidase activity//zinc ion binding//DNA binding	--	--	--	--
Cluster-58773.130420	453.856	853.678	-0.91146	0.038114	2494	524897752	XP_005105333.1	1.9e-75	PREDICTED: protein FAM43A-like [Aplysia californica]>gi|524897754|ref|XP_005105334.1| PREDICTED: protein FAM43A-like [Aplysia californica]>gi|871254004|ref|XP_012941837.1| PREDICTED: protein FAM43A-like [Aplysia californica]	961091206	XM_014916588.1	0	PREDICTED: Octopus bimaculoides probable serine/threonine-protein kinase DDB_G0267686 (LOC106870479), mRNA	--	--	--	--	Q8N2R8	1.6e-29	Protein FAM43A OS=Homo sapiens GN=FAM43A PE=2 SV=2	PF00640//PF14719//PF09726//PF00935//PF03996	Phosphotyrosine interaction domain (PTB/PID)//Phosphotyrosine interaction domain (PTB/PID)//Transmembrane protein//Ribosomal protein L44//Hemagglutinin esterase	GO:0006412//GO:0007165//GO:0019064//GO:0042254	translation//signal transduction//fusion of virus membrane with host plasma membrane//ribosome biogenesis	GO:0005515//GO:0003735//GO:0016788//GO:0046789	protein binding//structural constituent of ribosome//hydrolase activity, acting on ester bonds//host cell surface receptor binding	GO:0009986//GO:0005622//GO:0019031//GO:0005840//GO:0016021	cell surface//intracellular//viral envelope//ribosome//integral component of membrane	KOG4448	Uncharacterized conserved protein, contains phosphotyrosine interaction (PI) domain
Cluster-58773.187720	216.117	442.655	-1.0344	0.038122	4240	762108715	XP_011436989.1	3e-52	PREDICTED: LOW QUALITY PROTEIN: DDB1- and CUL4-associated factor 12-like [Crassostrea gigas]	961089888	XM_014916127.1	0	PREDICTED: Octopus bimaculoides DDB1- and CUL4-associated factor 12-like (LOC106870136), mRNA	--	--	--	--	Q8BGW4	2e-43	DDB1- and CUL4-associated factor 12-like protein 2 OS=Mus musculus GN=Dcaf12l2 PE=2 SV=1	PF02064//PF02728//PF00400//PF00631//PF08496//PF08039	MAS20 protein import receptor//Copper amine oxidase, N3 domain//WD domain, G-beta repeat//GGL domain//Peptidase family S49 N-terminal//Mitochondrial proteolipid	GO:0007186//GO:0007165//GO:0006886//GO:0055114//GO:0009308//GO:0006605	G-protein coupled receptor signaling pathway//signal transduction//intracellular protein transport//oxidation-reduction process//amine metabolic process//protein targeting	GO:0048038//GO:0005507//GO:0008131//GO:0004871//GO:0005515//GO:0004252	quinone binding//copper ion binding//primary amine oxidase activity//signal transducer activity//protein binding//serine-type endopeptidase activity	GO:0005886//GO:0005739//GO:0005742//GO:0005834	plasma membrane//mitochondrion//mitochondrial outer membrane translocase complex//heterotrimeric G-protein complex	--	--
Cluster-58773.171663	540.821	999.533	-1.5911	0.038213	1643	762114401	XP_011439979.1	2.8e-30	PREDICTED: MAM and LDL-receptor class A domain-containing protein 1-like [Crassostrea gigas]	961077981	XM_014911983.1	0	PREDICTED: Octopus bimaculoides MAM and LDL-receptor class A domain-containing protein 1-like (LOC106867184), mRNA	--	--	--	--	B3EWZ6	2.5e-26	MAM and LDL-receptor class A domain-containing protein 2 (Fragment) OS=Acropora millepora PE=1 SV=1	PF00629//PF00057	MAM domain, meprin/A5/mu//Low-density lipoprotein receptor domain class A	--	--	--	--	--	--	--	--
Cluster-58773.145781	41.5457	125.168	-1.5101	0.038213	582	229893916	ACQ90303.1	1.6e-28	cytochrome P450 [Hyriopsis cumingii]	961076318	XM_014935391.1	3.71131e-175	PREDICTED: Octopus bimaculoides cytochrome P450 3A9-like (LOC106884157), mRNA	--	--	--	--	O09158	3e-27	Cytochrome P450 3A25 OS=Mus musculus GN=Cyp3a25 PE=1 SV=1	PF00067	Cytochrome P450	--	--	GO:0005515	protein binding	GO:0016020	membrane	KOG0158	Cytochrome P450 CYP3/CYP5/CYP6/CYP9 subfamilies
Cluster-58773.177465	36.8319	104.906	-0.8861	0.038213	757	--	--	--	--	961068847	XM_014914607.1	0	PREDICTED: Octopus bimaculoides uncharacterized LOC106869081 (LOC106869081), mRNA	--	--	--	--	--	--	--	--	--	GO:0055114	oxidation-reduction process	GO:0005506//GO:0016705//GO:0020037	iron ion binding//oxidoreductase activity, acting on paired donors, with incorporation or reduction of molecular oxygen//heme binding	--	--	--	--
Cluster-58773.84430	320.902	720.445	-1.1668	0.038434	4960	847132402	XP_012819335.1	1.7e-78	PREDICTED: mucin-like protein [Xenopus (Silurana) tropicalis]	961139243	XM_014933350.1	0	PREDICTED: Octopus bimaculoides mucin-like protein (LOC106882610), partial mRNA	--	--	--	--	Q9DG42	5.7e-58	Protein yippee-like 1 OS=Coturnix coturnix japonica GN=YPEL1 PE=3 SV=1	PF07645//PF11606//PF06119//PF00008//PF01333	Calcium-binding EGF domain//Family 31 carbohydrate binding protein//Nidogen-like//EGF-like domain//Apocytochrome F, C-terminal	GO:0015979//GO:0007160//GO:0006118	photosynthesis//cell-matrix adhesion//obsolete electron transport	GO:0009055//GO:0020037//GO:0005506//GO:0005509//GO:0033905//GO:0005515	electron carrier activity//heme binding//iron ion binding//calcium ion binding//xylan endo-1,3-beta-xylosidase activity//protein binding	GO:0031361	integral component of thylakoid membrane	KOG3399	Predicted Yippee-type zinc-binding protein
Cluster-58773.95568	27.9127	169.224	-2.5999	0.038502	10939	162312016	ABX84114.1	3.5e-113	hedgling [Nematostella vectensis]	961119951	XM_014926651.1	0	PREDICTED: Octopus bimaculoides protocadherin Fat 4-like (LOC106877697), mRNA	--	--	--	--	Q2PZL6	4.6e-92	Protocadherin Fat 4 OS=Mus musculus GN=Fat4 PE=1 SV=2	PF00028	Cadherin domain	GO:0007156	homophilic cell adhesion via plasma membrane adhesion molecules	GO:0005509	calcium ion binding	GO:0016020	membrane	KOG1219	Uncharacterized conserved protein, contains laminin, cadherin and EGF domains
Cluster-137667.1	1.31748	13.5735	-3.3649	0.038565	1785	762155209	XP_011415702.1	4.1e-120	PREDICTED: tyrosine-protein kinase transmembrane receptor Ror-like [Crassostrea gigas]	961120466	XM_014926828.1	0	PREDICTED: Octopus bimaculoides BDNF/NT-3 growth factors receptor-like (LOC106877811), mRNA	--	--	--	--	Q91987	6.8e-78	BDNF/NT-3 growth factors receptor OS=Gallus gallus GN=NTRK2 PE=1 SV=1	PF00069//PF07714	Protein kinase domain//Protein tyrosine kinase	GO:0006468	protein phosphorylation	GO:0005524//GO:0004672	ATP binding//protein kinase activity	--	--	KOG1026	Nerve growth factor receptor TRKA and related tyrosine kinases
Cluster-58773.83035	2181.93	5121.85	-1.2311	0.038982	2153	554820859	XP_005921157.1	1.2e-105	PREDICTED: thymidine phosphorylase-like isoform X1 [Haplochromis burtoni]	961114695	XM_014924731.1	0	PREDICTED: Octopus bimaculoides thymidine phosphorylase-like (LOC106876243), mRNA	--	--	--	--	Q5FVR2	6e-97	Thymidine phosphorylase OS=Rattus norvegicus GN=Tymp PE=1 SV=1	PF07831//PF00591	Pyrimidine nucleoside phosphorylase C-terminal domain//Glycosyl transferase family, a/b domain	GO:0006213//GO:0008152	pyrimidine nucleoside metabolic process//metabolic process	GO:0016763//GO:0016757	transferase activity, transferring pentosyl groups//transferase activity, transferring glycosyl groups	--	--	--	--
Cluster-58773.218020	2440.32	4073.34	-0.73914	0.0391	4469	762147726	XP_011457177.1	1.2e-59	PREDICTED: uncharacterized protein LOC105349184 [Crassostrea gigas]	961128064	XM_014929460.1	0	PREDICTED: Octopus bimaculoides uncharacterized LOC106879769 (LOC106879769), mRNA	--	--	--	--	--	--	--	PF00811	Ependymin	GO:0007160	cell-matrix adhesion	GO:0005509	calcium ion binding	GO:0005576	extracellular region	--	--
Cluster-58773.35640	22.7307	84.1955	-4.3952	0.03949	1541	762117212	XP_011441456.1	5.2e-31	PREDICTED: arrestin domain-containing protein A-like isoform X2 [Crassostrea gigas]	961135074	XM_014931915.1	0	PREDICTED: Octopus bimaculoides uncharacterized LOC106881505 (LOC106881505), partial mRNA	--	--	--	--	--	--	--	--	--	GO:0008152	metabolic process	GO:0016597	amino acid binding	--	--	--	--
Cluster-58773.49333	0.387352	8.15069	-1.8891	0.03949	1829	676474843	XP_009060275.1	2.6e-130	hypothetical protein LOTGIDRAFT_183268 [Lottia gigantea]>gi|556100590|gb|ESO89242.1| hypothetical protein LOTGIDRAFT_183268 [Lottia gigantea]	961067737	XM_014932621.1	0	PREDICTED: Octopus bimaculoides L-threonine dehydratase catabolic TdcB-like (LOC106882032), mRNA	--	--	--	--	Q74FW6	1.5e-56	L-threonine ammonia-lyase OS=Geobacter sulfurreducens (strain ATCC 51573 / DSM 12127 / PCA) GN=tdcB PE=1 SV=1	PF01842	ACT domain	--	--	--	--	--	--	KOG1250	Threonine/serine dehydratases
Cluster-58773.173312	0.0001	5.77042	-15.8164	0.039596	3353	762122254	XP_011444075.1	1.2e-290	PREDICTED: coiled-coil domain-containing protein 132-like isoform X2 [Crassostrea gigas]	961106109	XM_014921712.1	0	PREDICTED: Octopus bimaculoides syndetin-like (LOC106874110), mRNA	--	--	--	--	Q96JG6	8.7e-260	Syndetin OS=Homo sapiens GN=VPS50 PE=1 SV=3	PF05384//PF02892	Sensor protein DegS//BED zinc finger	GO:0007165	signal transduction	GO:0003677//GO:0016301	DNA binding//kinase activity	--	--	KOG2939	Uncharacterized conserved protein
Cluster-58773.180089	44.6647	123.509	-1.4674	0.040614	931	--	--	--	--	961078463	XM_014912150.1	9.64792e-29	PREDICTED: Octopus bimaculoides uncharacterized LOC106867311 (LOC106867311), mRNA	--	--	--	--	--	--	--	PF13639	Ring finger domain	--	--	GO:0008270//GO:0005515	zinc ion binding//protein binding	--	--	--	--
Cluster-58773.189756	0.0001	7.55557	-16.2053	0.040708	1469	676434096	XP_009047115.1	5.9e-08	hypothetical protein LOTGIDRAFT_157086 [Lottia gigantea]>gi|556113305|gb|ESP01957.1| hypothetical protein LOTGIDRAFT_157086 [Lottia gigantea]	961128717	XM_014929684.1	0	PREDICTED: Octopus bimaculoides monocarboxylate transporter 2-like (LOC106879929), mRNA	--	--	--	--	--	--	--	PF07690	Major Facilitator Superfamily	GO:0055085	transmembrane transport	--	--	GO:0016021	integral component of membrane	--	--
Cluster-58773.180835	246.274	503.62	-1.0321	0.041054	1005	762101727	XP_011433350.1	4.1e-125	PREDICTED: alpha-L-fucosidase-like isoform X2 [Crassostrea gigas]	961119638	XM_014926550.1	0	PREDICTED: Octopus bimaculoides alpha-L-fucosidase-like (LOC106877605), mRNA	--	--	--	--	Q2KIM0	9.6e-122	Tissue alpha-L-fucosidase OS=Bos taurus GN=FUCA1 PE=2 SV=1	PF01120	Alpha-L-fucosidase	GO:0005975	carbohydrate metabolic process	GO:0004560	alpha-L-fucosidase activity	--	--	--	--
Cluster-58773.79513	6.56859	30.2664	-2.2041	0.0412	2534	676431027	XP_009046116.1	5e-103	hypothetical protein LOTGIDRAFT_224605 [Lottia gigantea]>gi|556114541|gb|ESP03193.1| hypothetical protein LOTGIDRAFT_224605 [Lottia gigantea]	961069738	XM_014917659.1	0	PREDICTED: Octopus bimaculoides F-box/LRR-repeat protein 4-like (LOC106871283), transcript variant X2, mRNA	--	--	--	--	Q8BH70	1.5e-94	F-box/LRR-repeat protein 4 OS=Mus musculus GN=Fbxl4 PE=1 SV=1	PF15966//PF12937//PF13855//PF00646//PF00560	F-box//F-box-like//Leucine rich repeat//F-box domain//Leucine Rich Repeat	--	--	GO:0005515	protein binding	--	--	KOG1947	Leucine rich repeat proteins, some proteins contain F-box
Cluster-58773.114834	2927.54	4906.93	-17.5256	0.041847	2292	676496775	XP_009067325.1	4.6e-47	hypothetical protein LOTGIDRAFT_170435 [Lottia gigantea]>gi|556093372|gb|ESO82025.1| hypothetical protein LOTGIDRAFT_170435 [Lottia gigantea]	961100879	XM_014919894.1	0	PREDICTED: Octopus bimaculoides serine--tRNA ligase, mitochondrial-like (LOC106872786), transcript variant X5, mRNA	--	--	--	--	Q95T19	3.3e-24	Serine--tRNA synthetase-like protein Slimp OS=Drosophila melanogaster GN=Slimp PE=1 SV=1	PF09177//PF00587	Syntaxin 6, N-terminal//tRNA synthetase class II core domain (G, H, P, S and T)	--	--	--	--	--	--	KOG2509	Seryl-tRNA synthetase
Cluster-58773.150170	0.0001	18.8679	-0.74513	0.041847	490	871269217	XP_005110587.2	1.2e-21	PREDICTED: ganglioside GM2 activator-like [Aplysia californica]	961140536	XM_014933799.1	3.96674e-179	PREDICTED: Octopus bimaculoides ganglioside GM2 activator-like (LOC106882953), mRNA	--	--	--	--	Q60648	1e-15	Ganglioside GM2 activator OS=Mus musculus GN=Gm2a PE=1 SV=2	--	--	GO:0006418//GO:0048193	tRNA aminoacylation for protein translation//Golgi vesicle transport	GO:0004812//GO:0000166//GO:0005524	aminoacyl-tRNA ligase activity//nucleotide binding//ATP binding	GO:0016020	membrane	--	--
Cluster-58773.161827	22.181	75.3047	-1.7634	0.042332	963	260817940	XP_002603843.1	1.3e-16	hypothetical protein BRAFLDRAFT_285391 [Branchiostoma floridae]>gi|229289166|gb|EEN59854.1| hypothetical protein BRAFLDRAFT_285391 [Branchiostoma floridae]	961085703	XM_014914656.1	0	PREDICTED: Octopus bimaculoides bridging integrator 3-like (LOC106869110), transcript variant X4, mRNA	--	--	--	--	Q9NQY0	5.4e-13	Bridging integrator 3 OS=Homo sapiens GN=BIN3 PE=1 SV=1	PF03114	BAR domain	--	--	GO:0005515	protein binding	GO:0005737	cytoplasm	KOG3771	Amphiphysin
Cluster-58773.207754	3.53043	21.4002	-2.5997	0.04257	1971	871260798	XP_005107744.2	3.4e-184	PREDICTED: TNF receptor-associated factor 4-like [Aplysia californica]	961096928	XM_014918575.1	0	PREDICTED: Octopus bimaculoides TNF receptor-associated factor 4-like (LOC106871852), transcript variant X1, mRNA	--	--	--	--	Q61382	3.3e-134	TNF receptor-associated factor 4 OS=Mus musculus GN=Traf4 PE=1 SV=2	PF00917//PF02176//PF14634//PF00097//PF15965//PF13639//PF11789//PF15233	MATH domain//TRAF-type zinc finger//zinc-RING finger domain//Zinc finger, C3HC4 type (RING finger)//TRAF-like zinc-finger//Ring finger domain//Zinc-finger of the MIZ type in Nse subunit//Synaptonemal complex central element protein 1	GO:0070193//GO:0007128//GO:0007130	synaptonemal complex organization//meiotic prophase I//synaptonemal complex assembly	GO:0008270//GO:0005515//GO:0046872	zinc ion binding//protein binding//metal ion binding	GO:0000795	synaptonemal complex	KOG0297	TNF receptor-associated factor
Cluster-58773.140025	19.7211	66.0771	-18.5559	0.042764	3560	--	--	--	--	961074365	XM_014933572.1	0	PREDICTED: Octopus bimaculoides acyl-CoA-binding domain-containing protein 5-like (LOC106882786), mRNA	--	--	--	--	--	--	--	PF03498//PF03123	Cytolethal distending toxin A/C domain//CAT RNA binding domain	--	--	--	--	GO:0019028	viral capsid	--	--
Cluster-58773.144896	0.0001	38.5381	-1.7444	0.042764	701	762093985	XP_011429462.1	9.9e-54	PREDICTED: uncharacterized protein LOC105329760 [Crassostrea gigas]>gi|762093987|ref|XP_011429463.1| PREDICTED: uncharacterized protein LOC105329760 [Crassostrea gigas]	961073211	XM_014929659.1	0	PREDICTED: Octopus bimaculoides uncharacterized LOC106879907 (LOC106879907), mRNA	--	--	--	--	--	--	--	PF03067	Chitin binding domain	GO:0009405	pathogenesis	GO:0003723	RNA binding	--	--	--	--
Cluster-58773.133926	48.5893	131.675	-1.4383	0.042997	3994	762081244	XP_011421205.1	9.4e-258	PREDICTED: V-type proton ATPase 116 kDa subunit a isoform 1-like isoform X4 [Crassostrea gigas]	961100833	XM_014919878.1	0	PREDICTED: Octopus bimaculoides V-type proton ATPase 116 kDa subunit a isoform 1-like (LOC106872779), mRNA	--	--	--	--	Q93050	8.5e-246	V-type proton ATPase 116 kDa subunit a isoform 1 OS=Homo sapiens GN=ATP6V0A1 PE=1 SV=3	PF01496//PF16036	V-type ATPase 116kDa subunit family//Chalcone isomerase-like	GO:0015991//GO:0015992	ATP hydrolysis coupled proton transport//proton transport	GO:0015078//GO:0016872	hydrogen ion transmembrane transporter activity//intramolecular lyase activity	GO:0033179	proton-transporting V-type ATPase, V0 domain	KOG2189	Vacuolar H+-ATPase V0 sector, subunit a
Cluster-58773.152794	205.355	1080.19	-2.3951	0.043093	1054	--	--	--	--	961109577	XM_014922919.1	0	PREDICTED: Octopus bimaculoides mitochondrial uncoupling protein 2-like (LOC106874985), transcript variant X2, mRNA	--	--	--	--	--	--	--	PF01284//PF07664	Membrane-associating domain//Ferrous iron transport protein B C terminus	GO:0015684	ferrous iron transport	GO:0015093	ferrous iron transmembrane transporter activity	GO:0016021//GO:0016020	integral component of membrane//membrane	--	--
Cluster-58773.186936	374.637	756.559	-1.014	0.043134	6164	762144049	XP_011455288.1	1.5e-108	PREDICTED: helicase with zinc finger domain 2-like [Crassostrea gigas]	961139600	XM_014933474.1	0	PREDICTED: Octopus bimaculoides probable helicase with zinc finger domain (LOC106882711), mRNA	--	--	--	--	P42694	4e-77	Probable helicase with zinc finger domain OS=Homo sapiens GN=HELZ PE=1 SV=2	PF02562//PF04851//PF00580//PF13361	PhoH-like protein//Type III restriction enzyme, res subunit//UvrD/REP helicase N-terminal domain//UvrD-like helicase C-terminal domain	--	--	GO:0005524//GO:0003677//GO:0016787	ATP binding//DNA binding//hydrolase activity	--	--	KOG1804	RNA helicase
Cluster-58773.162080	190359	302175	-0.66666	0.043233	11684	871270780	XP_012945015.1	5.4e-213	PREDICTED: uncharacterized protein LOC101850683 [Aplysia californica]	961098896	XM_014919200.1	0	PREDICTED: Octopus bimaculoides uncharacterized LOC106872275 (LOC106872275), mRNA	--	--	--	--	Q9U943	4.5e-77	Apolipophorins OS=Locusta migratoria PE=1 SV=2	PF09172//PF06448//PF01347	Domain of unknown function (DUF1943)//Domain of Unknown Function (DUF1081)//Lipoprotein amino terminal region	GO:0006869	lipid transport	GO:0005319	lipid transporter activity	--	--	--	--
Cluster-58773.190817	13.3951	61.3427	-2.1952	0.043277	369	--	--	--	--	--	--	--	--	--	--	--	--	--	--	--	--	--	--	--	--	--	--	--	--	--
Cluster-58773.95799	2487.35	4122.84	-0.72903	0.043461	3285	871255631	XP_012942154.1	1.7e-217	PREDICTED: alpha-N-acetylglucosaminidase-like isoform X2 [Aplysia californica]>gi|871255634|ref|XP_012942155.1| PREDICTED: alpha-N-acetylglucosaminidase-like isoform X2 [Aplysia californica]	961130596	XM_014930339.1	0	PREDICTED: Octopus bimaculoides alpha-N-acetylglucosaminidase-like (LOC106880424), mRNA	--	--	--	--	P54802	1.9e-179	Alpha-N-acetylglucosaminidase OS=Homo sapiens GN=NAGLU PE=1 SV=2	--	--	--	--	--	--	--	--	--	--
Cluster-58773.138042	2.73264	17.9406	-2.7149	0.043712	1844	--	--	--	--	--	--	--	--	--	--	--	--	--	--	--	--	--	--	--	--	--	--	--	--	--
Cluster-58773.181640	460.049	846.965	-0.88051	0.043978	2940	676463329	XP_009056562.1	7.6e-55	hypothetical protein LOTGIDRAFT_120003 [Lottia gigantea]>gi|556104226|gb|ESO92878.1| hypothetical protein LOTGIDRAFT_120003 [Lottia gigantea]	961096051	XM_014918266.1	0	PREDICTED: Octopus bimaculoides uncharacterized LOC106871674 (LOC106871674), mRNA	K08561	NR6A1, GCNF	germ cell nuclear factor	http://www.genome.jp/dbget-bin/www_bget?ko:K08561	Q9W539	3.6e-44	Hormone receptor 4 OS=Drosophila melanogaster GN=Hr4 PE=1 SV=4	PF05859//PF11857//PF00105//PF00104	Mis12 protein//Domain of unknown function (DUF3377)//Zinc finger, C4 type (two domains)//Ligand-binding domain of nuclear hormone receptor	GO:0007049//GO:0006355//GO:0043401//GO:0007067	cell cycle//regulation of transcription, DNA-templated//steroid hormone mediated signaling pathway//mitotic nuclear division	GO:0043565//GO:0003700//GO:0008270//GO:0004222	sequence-specific DNA binding//transcription factor activity, sequence-specific DNA binding//zinc ion binding//metalloendopeptidase activity	GO:0000775//GO:0005634//GO:0005667	chromosome, centromeric region//nucleus//transcription factor complex	KOG3575	FOG: Hormone receptors
Cluster-58773.4492	0.0001	7.0195	-16.0991	0.044024	1211	--	--	--	--	961072942	XM_014928714.1	0	PREDICTED: Octopus bimaculoides peroxisomal and mitochondrial division factor 1-like (LOC106879222), transcript variant X2, mRNA	--	--	--	--	--	--	--	--	--	--	--	--	--	--	--	--	--
Cluster-58773.177780	0.526707	9.55634	-4.1814	0.044395	1502	405954235	EKC21733.1	1.1e-33	Adipophilin [Crassostrea gigas]	961102589	XM_014920499.1	0	PREDICTED: Octopus bimaculoides perilipin-3-like (LOC106873228), mRNA	--	--	--	--	O60664	5.6e-17	Perilipin-3 OS=Homo sapiens GN=PLIN3 PE=1 SV=3	PF13958	Toxin ToxN, type III toxin-antitoxin system	GO:0051252	regulation of RNA metabolic process	GO:0003723//GO:0004521	RNA binding//endoribonuclease activity	--	--	--	--
Cluster-58773.84955	144.076	408.365	-1.503	0.044638	1002	--	--	--	--	961075992	XM_014935285.1	0	PREDICTED: Octopus bimaculoides transcription factor kayak-like (LOC106884067), transcript variant X2, mRNA	--	--	--	--	--	--	--	PF02601//PF03614//PF05837//PF07716//PF00170//PF01763//PF03131//PF07989	Exonuclease VII, large subunit//Repressor of phase-1 flagellin//Centromere protein H (CENP-H)//Basic region leucine zipper//bZIP transcription factor//Herpesvirus UL6 like//bZIP Maf transcription factor//Centrosomin N-terminal motif 1	GO:0006323//GO:0006308//GO:0006355//GO:0051382	DNA packaging//DNA catabolic process//regulation of transcription, DNA-templated//kinetochore assembly	GO:0043565//GO:0003700//GO:0003677//GO:0008855	sequence-specific DNA binding//transcription factor activity, sequence-specific DNA binding//DNA binding//exodeoxyribonuclease VII activity	GO:0005634//GO:0005815//GO:0005667//GO:0009318//GO:0000776	nucleus//microtubule organizing center//transcription factor complex//exodeoxyribonuclease VII complex//kinetochore	--	--
Cluster-58773.162320	74.0898	184.695	-1.3178	0.044916	492	16596797	AAK28276.2	2.1e-87	hemocyanin G-type [Enteroctopus dofleini]	961143099	XM_014934702.1	0	PREDICTED: Octopus bimaculoides hemocyanin G-type, units Oda to Odg-like (LOC106883610), partial mRNA	--	--	--	--	O61363	8.9e-89	Hemocyanin G-type, units Oda to Odg OS=Enteroctopus dofleini GN=ODHCY PE=1 SV=1	PF00264//PF15880	Common central domain of tyrosinase//NADH dehydrogenase [ubiquinone] flavoprotein 3, mitochondrial	GO:0008152	metabolic process	GO:0016491	oxidoreductase activity	GO:0005739//GO:0005747	mitochondrion//mitochondrial respiratory chain complex I	--	--
Cluster-58773.47004	100.334	241.737	-17.5068	0.044954	2507	--	--	--	--	--	--	--	--	--	--	--	--	--	--	--	PF07552	Spore Coat Protein X and V domain	--	--	--	--	--	--	--	--
Cluster-58773.169109	0.0001	18.6239	-2.5489	0.044954	2739	762152239	XP_011414118.1	1.5e-81	PREDICTED: proton-gated ion channel subunit pbo-5-like isoform X3 [Crassostrea gigas]	961097798	XM_014918884.1	0	PREDICTED: Octopus bimaculoides uncharacterized LOC106872046 (LOC106872046), mRNA	--	--	--	--	--	--	--	PF02931//PF01289//PF13895	Neurotransmitter-gated ion-channel ligand binding domain//Thiol-activated cytolysin//Immunoglobulin domain	GO:0030435	sporulation resulting in formation of a cellular spore	--	--	GO:0031160	spore wall	--	--
Cluster-58773.96143	14.6798	85.9037	-1.2686	0.044954	949	--	--	--	--	--	--	--	--	--	--	--	--	--	--	--	--	--	GO:0009405//GO:0006811//GO:0006810	pathogenesis//ion transport//transport	GO:0005515//GO:0005230//GO:0015485	protein binding//extracellular ligand-gated ion channel activity//cholesterol binding	GO:0016020	membrane	--	--
Cluster-58773.117148	166.492	361.29	-17.9635	0.044969	3019	762114758	XP_011440170.1	1.4e-141	PREDICTED: F-box/WD repeat-containing protein 5-like [Crassostrea gigas]	961110859	XM_014923370.1	0	PREDICTED: Octopus bimaculoides F-box/WD repeat-containing protein 5-like (LOC106875284), transcript variant X2, mRNA	--	--	--	--	Q4KLI9	9.8e-61	F-box/WD repeat-containing protein 5 OS=Rattus norvegicus GN=Fbxw5 PE=2 SV=1	PF00646//PF12937//PF15966//PF00400	F-box domain//F-box-like//F-box//WD domain, G-beta repeat	--	--	--	--	--	--	KOG0265	U5 snRNP-specific protein-like factor and related proteins
Cluster-58773.203083	0.0001	25.5586	-1.1177	0.044969	1664	--	--	--	--	--	--	--	--	--	--	--	--	--	--	--	--	--	--	--	GO:0005515	protein binding	--	--	--	--
Cluster-58773.198726	5.31734	28.3461	-2.4144	0.045166	2975	2239176	CAA72331.1	4.6e-140	melanogenic peroxidase [Sepia officinalis]	961088765	XM_014915741.1	0	PREDICTED: Octopus bimaculoides chorion peroxidase-like (LOC106869840), mRNA	--	--	--	--	Q9VEG6	3.4e-82	Chorion peroxidase OS=Drosophila melanogaster GN=Pxt PE=2 SV=3	--	--	--	--	--	--	--	--	KOG2408	Peroxidase/oxygenase
Cluster-58773.170908	10.5985	56.2936	-2.4091	0.045444	446	--	--	--	--	--	--	--	--	--	--	--	--	--	--	--	--	--	--	--	--	--	--	--	--	--
Cluster-58773.125869	1039.63	1783.5	-1.3409	0.04607	467	--	--	--	--	961132100	XM_014930874.1	6.62294e-142	PREDICTED: Octopus bimaculoides poly [ADP-ribose] polymerase 14-like (LOC106880778), mRNA	--	--	--	--	--	--	--	--	--	--	--	--	--	GO:0005856//GO:0005739	cytoskeleton//mitochondrion	--	--
Cluster-58773.84588	67.4046	170.74	-0.77864	0.04607	5396	871250853	XP_012941273.1	2.2e-185	PREDICTED: unconventional myosin-VIIa-like, partial [Aplysia californica]	961100117	XM_014919623.1	0	PREDICTED: Octopus bimaculoides myosin-VIIa-like (LOC106872589), mRNA	--	--	--	--	Q17LW0	1.7e-156	Myosin-VIIa OS=Aedes aegypti GN=ck PE=3 SV=1	PF00784//PF08039	MyTH4 domain//Mitochondrial proteolipid	--	--	--	--	--	--	KOG4229	Myosin VII, myosin IXB and related myosins
Cluster-58773.250698	42.3995	163.782	-1.9497	0.046359	1046	820128303	KKX05008.1	2.2e-28	interferon regulatory factor 2-like, partial [Scleropages formosus]	961140039	XM_014933623.1	0	PREDICTED: Octopus bimaculoides interferon regulatory factor 2-like (LOC106882833), transcript variant X2, mRNA	--	--	--	--	Q98925	3.2e-27	Interferon regulatory factor 2 OS=Gallus gallus GN=IRF2 PE=2 SV=1	PF00605	Interferon regulatory factor transcription factor	--	--	GO:0000975	regulatory region DNA binding	--	--	--	--
Cluster-58773.143942	530.116	1018.99	-0.94276	0.046503	2749	762126659	XP_011446392.1	1.2e-75	PREDICTED: regulator of microtubule dynamics protein 1-like [Crassostrea gigas]	961142142	XM_014934358.1	0	PREDICTED: Octopus bimaculoides regulator of microtubule dynamics protein 1-like (LOC106883369), transcript variant X1, mRNA	--	--	--	--	Q32KL4	7.8e-65	Regulator of microtubule dynamics protein 1 OS=Bos taurus GN=RMDN1 PE=2 SV=1	PF13414//PF13181//PF00515	TPR repeat//Tetratricopeptide repeat//Tetratricopeptide repeat	--	--	GO:0005515	protein binding	--	--	--	--
Cluster-139876.1	176.154	367.145	-17.0742	0.046666	1882	762102668	XP_011433834.1	1.8e-49	PREDICTED: organic cation transporter protein-like isoform X1 [Crassostrea gigas]	961078090	XM_014912023.1	0	PREDICTED: Octopus bimaculoides solute carrier family 22 member 2-like (LOC106867215), mRNA	--	--	--	--	Q9VCA2	5.9e-40	Organic cation transporter protein OS=Drosophila melanogaster GN=Orct PE=1 SV=1	PF00083//PF07690	Sugar (and other) transporter//Major Facilitator Superfamily	--	--	--	--	--	--	KOG0255	Synaptic vesicle transporter SVOP and related transporters (major facilitator superfamily)
Cluster-58773.162658	260.038	506.216	-1.0595	0.046666	542	--	--	--	--	961118320	XM_014926093.1	0	PREDICTED: Octopus bimaculoides uncharacterized LOC106877231 (LOC106877231), transcript variant X3, mRNA	--	--	--	--	--	--	--	--	--	--	--	--	--	GO:0005886//GO:0016021	plasma membrane//integral component of membrane	--	--
Cluster-58773.139020	0.0001	13.7988	-0.96103	0.046666	1383	676479928	XP_009061899.1	3.9e-09	hypothetical protein LOTGIDRAFT_235099 [Lottia gigantea]>gi|556098780|gb|ESO87432.1| hypothetical protein LOTGIDRAFT_235099 [Lottia gigantea]	961108130	XM_014922420.1	0	PREDICTED: Octopus bimaculoides claudin domain-containing protein 1-like (LOC106874625), mRNA	--	--	--	--	--	--	--	PF13903//PF06687//PF00822	PMP-22/EMP/MP20/Claudin tight junction//SUR7/PalI family//PMP-22/EMP/MP20/Claudin family	GO:0055085	transmembrane transport	GO:0022857	transmembrane transporter activity	GO:0016021	integral component of membrane	--	--
Cluster-58773.124929	18.2306	68.6147	-1.9122	0.0469	862	--	--	--	--	--	--	--	--	--	--	--	--	--	--	--	--	--	--	--	--	--	--	--	--	--
Cluster-58773.135845	84.0311	206.86	-1.2997	0.047352	429	--	--	--	--	--	--	--	--	--	--	--	--	--	--	--	--	--	--	--	--	--	--	--	--	--
Cluster-58773.145481	3038.27	6319.42	-2.3061	0.047527	1362	--	--	--	--	961084774	XM_014914327.1	0	PREDICTED: Octopus bimaculoides autism susceptibility gene 2 protein-like (LOC106868878), mRNA	--	--	--	--	--	--	--	--	--	GO:0007165	signal transduction	--	--	GO:0016020//GO:0005887	membrane//integral component of plasma membrane	--	--
Cluster-58773.157846	6.96835	34.4623	-1.0565	0.047527	6502	--	--	--	--	--	--	--	--	--	--	--	--	--	--	--	PF11023//PF15234	Zinc-ribbon containing domain//Linker for activation of T-cells	--	--	--	--	--	--	--	--
Cluster-58773.132041	5476.53	8926.98	-0.70491	0.047535	762	492370606	AGL33705.1	5.2e-32	cathepsin L2 [Sinonovacula constricta]	961087055	XM_014915142.1	0	PREDICTED: Octopus bimaculoides cathepsin L1-like (LOC106869412), mRNA	--	--	--	--	P43236	2.2e-25	Cathepsin K OS=Oryctolagus cuniculus GN=CTSK PE=1 SV=1	PF00112	Papain family cysteine protease	GO:0006508	proteolysis	GO:0008234	cysteine-type peptidase activity	--	--	KOG1543	Cysteine proteinase Cathepsin L
Cluster-58773.119702	11.4603	43.831	-2.5656	0.047661	2627	871241348	XP_012939565.1	7.2e-190	PREDICTED: CLIP-associating protein 1-like [Aplysia californica]	961122620	XM_014927571.1	0	PREDICTED: Octopus bimaculoides CLIP-associating protein 1-B-like (LOC106878380), mRNA	--	--	--	--	Q4U0G1	1.3e-130	CLIP-associating protein 1-A OS=Xenopus laevis GN=clasp1-a PE=2 SV=2	PF02985//PF00514//PF03002//PF01602//PF00436//PF00790	HEAT repeat//Armadillo/beta-catenin-like repeat//Somatostatin/Cortistatin family//Adaptin N terminal region//Single-strand binding protein family//VHS domain	GO:0006813//GO:0006355	potassium ion transport//regulation of transcription, DNA-templated	GO:0003700//GO:0043565//GO:0003677//GO:0016286	transcription factor activity, sequence-specific DNA binding//sequence-specific DNA binding//DNA binding//small conductance calcium-activated potassium channel activity	GO:0005667//GO:0016021//GO:0005634	transcription factor complex//integral component of membrane//nucleus	KOG1242	Protein containing adaptin N-terminal region
Cluster-58773.1213	3.60161	21.3221	-1.9353	0.047661	3090	762163020	XP_011419794.1	5.5e-64	PREDICTED: protein CREBRF homolog isoform X3 [Crassostrea gigas]	961113608	XM_014924320.1	0	PREDICTED: Octopus bimaculoides uncharacterized LOC106875976 (LOC106875976), mRNA	--	--	--	--	Q9VC61	5e-44	Protein CREBRF homolog OS=Drosophila melanogaster GN=CG13624 PE=2 SV=2	PF03131//PF03530//PF00170//PF07716	bZIP Maf transcription factor//Calcium-activated SK potassium channel//bZIP transcription factor//Basic region leucine zipper	GO:0006886//GO:0007165//GO:0016192	intracellular protein transport//signal transduction//vesicle-mediated transport	GO:0005515//GO:0003697//GO:0005179	protein binding//single-stranded DNA binding//hormone activity	GO:0005576//GO:0030117	extracellular region//membrane coat	--	--
Cluster-3132.0	148.73	313.279	-5.2972	0.047743	425	470361846	XP_004365207.1	2.9e-08	hypothetical protein CAOG_00336 [Capsaspora owczarzaki ATCC 30864]>gi|765548122|gb|KJE88743.1| hypothetical protein CAOG_000336 [Capsaspora owczarzaki ATCC 30864]	--	--	--	--	--	--	--	--	O88322	3.7e-06	Nidogen-2 OS=Mus musculus GN=Nid2 PE=1 SV=2	PF00008//PF07645	EGF-like domain//Calcium-binding EGF domain	GO:0033014//GO:0006890//GO:0015994	tetrapyrrole biosynthetic process//retrograde vesicle-mediated transport, Golgi to ER//chlorophyll metabolic process	GO:0004655//GO:0046872	porphobilinogen synthase activity//metal ion binding	GO:0016021	integral component of membrane	--	--
Cluster-58773.124665	0.175569	6.90336	-1.0747	0.047743	1429	762097405	XP_011431272.1	2.8e-127	PREDICTED: delta-aminolevulinic acid dehydratase-like [Crassostrea gigas]>gi|405957387|gb|EKC23601.1| Delta-aminolevulinic acid dehydratase [Crassostrea gigas]	961090540	XM_014916354.1	0	PREDICTED: Octopus bimaculoides delta-aminolevulinic acid dehydratase-like (LOC106870329), mRNA	--	--	--	--	Q58DK5	1.7e-119	Delta-aminolevulinic acid dehydratase OS=Bos taurus GN=ALAD PE=2 SV=1	PF00490//PF08551	Delta-aminolevulinic acid dehydratase//Eukaryotic integral membrane protein (DUF1751)	--	--	GO:0005509//GO:0005515	calcium ion binding//protein binding	--	--	KOG2794	Delta-aminolevulinic acid dehydratase
Cluster-58773.145591	271.948	555.502	-1.0305	0.048056	1922	347966858	XP_321112.5	6.8e-153	AGAP001951-PA [Anopheles gambiae str. PEST]>gi|333469867|gb|EAA01272.5| AGAP001951-PA [Anopheles gambiae str. PEST]	961107021	XM_014922038.1	0	PREDICTED: Octopus bimaculoides short-chain specific acyl-CoA dehydrogenase, mitochondrial-like (LOC106874336), mRNA	--	--	--	--	Q5RAS0	3.6e-149	Short-chain specific acyl-CoA dehydrogenase, mitochondrial OS=Pongo abelii GN=ACADS PE=2 SV=1	PF02770//PF02771//PF00441	Acyl-CoA dehydrogenase, middle domain//Acyl-CoA dehydrogenase, N-terminal domain//Acyl-CoA dehydrogenase, C-terminal domain	GO:0006118//GO:0008152//GO:0055114	obsolete electron transport//metabolic process//oxidation-reduction process	GO:0016627//GO:0003995//GO:0050660	oxidoreductase activity, acting on the CH-CH group of donors//acyl-CoA dehydrogenase activity//flavin adenine dinucleotide binding	--	--	KOG0139	Short-chain acyl-CoA dehydrogenase
Cluster-58685.3	6.71323	30.0622	-2.1629	0.04818	1840	675850676	XP_009010898.1	3.1e-86	hypothetical protein HELRODRAFT_96929 [Helobdella robusta]>gi|555707396|gb|ESO10629.1| hypothetical protein HELRODRAFT_96929 [Helobdella robusta]	961092538	XM_014917046.1	0	PREDICTED: Octopus bimaculoides cytochrome P450 3A8-like (LOC106870822), transcript variant X3, mRNA	--	--	--	--	Q98T91	1.5e-80	Cytochrome P450 3A40 OS=Oryzias latipes GN=cyp3a40 PE=2 SV=1	PF00067	Cytochrome P450	GO:0055114	oxidation-reduction process	GO:0005506//GO:0016705//GO:0020037	iron ion binding//oxidoreductase activity, acting on paired donors, with incorporation or reduction of molecular oxygen//heme binding	--	--	KOG0158	Cytochrome P450 CYP3/CYP5/CYP6/CYP9 subfamilies
Cluster-58773.81574	114.802	291.675	-1.3452	0.048661	2119	676472988	XP_009059669.1	1.6e-94	hypothetical protein LOTGIDRAFT_125059, partial [Lottia gigantea]>gi|556100959|gb|ESO89611.1| hypothetical protein LOTGIDRAFT_125059, partial [Lottia gigantea]	961080803	XM_014912966.1	0	PREDICTED: Octopus bimaculoides opioid-binding protein/cell adhesion molecule homolog (LOC106867898), mRNA	--	--	--	--	Q98892	4.1e-29	Opioid-binding protein/cell adhesion molecule homolog OS=Gallus gallus GN=OPCML PE=1 SV=2	PF03287//PF13895	Poxvirus C7/F8A protein//Immunoglobulin domain	GO:0016032	viral process	GO:0005515	protein binding	--	--	KOG0613	Projectin/twitchin and related proteins
Cluster-58773.155111	3332.93	7783.21	-1.2236	0.048667	6267	146152115	ABQ08059.1	2.8e-232	chitin synthase [Mytilus galloprovincialis]	961109462	XM_014922879.1	0	PREDICTED: Octopus bimaculoides uncharacterized LOC106874956 (LOC106874956), mRNA	--	--	--	--	Q8NEV4	4.2e-98	Myosin-IIIa OS=Homo sapiens GN=MYO3A PE=2 SV=2	PF00910//PF04851//PF08717//PF02367//PF00158//PF06414//PF00063	RNA helicase//Type III restriction enzyme, res subunit//nsp8 replicase//Threonylcarbamoyl adenosine biosynthesis protein TsaE//Sigma-54 interaction domain//Zeta toxin//Myosin head (motor domain)	GO:0002949//GO:0006508//GO:0006355	tRNA threonylcarbamoyladenosine modification//proteolysis//regulation of transcription, DNA-templated	GO:0008134//GO:0016740//GO:0005524//GO:0003774//GO:0004197//GO:0016787//GO:0003677//GO:0016301//GO:0003723//GO:0008242//GO:0003724	transcription factor binding//transferase activity//ATP binding//motor activity//cysteine-type endopeptidase activity//hydrolase activity//DNA binding//kinase activity//RNA binding//omega peptidase activity//RNA helicase activity	GO:0005667//GO:0016459	transcription factor complex//myosin complex	KOG4229	Myosin VII, myosin IXB and related myosins
Cluster-58773.187378	454.833	1144.2	-1.3309	0.048827	2027	675378192	KFM71094.1	1.5e-142	Iron/zinc purple acid phosphatase-like protein, partial [Stegodyphus mimosarum]	961118256	XM_014926070.1	0	PREDICTED: Octopus bimaculoides iron/zinc purple acid phosphatase-like protein (LOC106877215), transcript variant X3, mRNA	--	--	--	--	A5D6U8	2.2e-133	Acid phosphatase type 7 OS=Danio rerio GN=acp7 PE=2 SV=1	PF16656//PF07348//PF00149	Purple acid Phosphatase, N-terminal domain//Syd protein (SUKH-2)//Calcineurin-like phosphoesterase	GO:0006771//GO:0019497	riboflavin metabolic process//hexachlorocyclohexane metabolic process	GO:0046872//GO:0003993//GO:0016787	metal ion binding//acid phosphatase activity//hydrolase activity	GO:0009898	cytoplasmic side of plasma membrane	KOG1378	Purple acid phosphatase
Cluster-58773.169616	0.0001	7.48666	-16.192	0.048947	1405	--	--	--	--	961102809	XM_014920576.1	5.58235e-172	PREDICTED: Octopus bimaculoides nascent polypeptide-associated complex subunit alpha, muscle-specific form-like (LOC106873279), transcript variant X4, mRNA	--	--	--	--	--	--	--	PF03326	Herpesvirus transcription activation factor (transactivator)	GO:0006355	regulation of transcription, DNA-templated	--	--	--	--	--	--
Cluster-58773.145772	156.972	332.459	-1.0827	0.048947	672	558115567	XP_006112962.1	2.5e-30	PREDICTED: cytochrome P450 3A24-like [Pelodiscus sinensis]	961076318	XM_014935391.1	0	PREDICTED: Octopus bimaculoides cytochrome P450 3A9-like (LOC106884157), mRNA	--	--	--	--	Q64409	1.3e-29	Cytochrome P450 3A17 OS=Cavia porcellus GN=CYP3A17 PE=2 SV=1	PF00067//PF02515	Cytochrome P450//CoA-transferase family III	GO:0055114	oxidation-reduction process	GO:0016705//GO:0020037//GO:0005506//GO:0003824	oxidoreductase activity, acting on paired donors, with incorporation or reduction of molecular oxygen//heme binding//iron ion binding//catalytic activity	--	--	KOG0158	Cytochrome P450 CYP3/CYP5/CYP6/CYP9 subfamilies
Cluster-58773.101610	722.643	1496.75	-1.0505	0.048947	627	762101555	XP_011433261.1	1.6e-42	PREDICTED: deleted in malignant brain tumors 1 protein-like isoform X1 [Crassostrea gigas]	961118518	XM_014926157.1	0	PREDICTED: Octopus bimaculoides neurotrypsin-like (LOC106877287), partial mRNA	--	--	--	--	Q2VLH6	4.9e-39	Scavenger receptor cysteine-rich type 1 protein M130 OS=Mus musculus GN=Cd163 PE=1 SV=2	PF04444//PF00530//PF15494	Catechol dioxygenase N terminus//Scavenger receptor cysteine-rich domain//Scavenger receptor cysteine-rich domain	GO:0018874//GO:0055114//GO:0009712//GO:0046232//GO:0042184//GO:0007165//GO:0019261//GO:0042203	benzoate metabolic process//oxidation-reduction process//catechol-containing compound metabolic process//carbazole catabolic process//xylene catabolic process//signal transduction//1,4-dichlorobenzene catabolic process//toluene catabolic process	GO:0005044//GO:0005506//GO:0018576	scavenger receptor activity//iron ion binding//catechol 1,2-dioxygenase activity	GO:0016020	membrane	--	--
Cluster-58773.39613	11.1763	53.5871	-2.2614	0.049066	415	762154277	XP_011415202.1	2.8e-11	PREDICTED: A disintegrin and metalloproteinase with thrombospondin motifs 2-like isoform X1 [Crassostrea gigas]	961067758	XM_014933311.1	3.34764e-174	PREDICTED: Octopus bimaculoides A disintegrin and metalloproteinase with thrombospondin motifs 12-like (LOC106882557), mRNA	--	--	--	--	Q13443	9.5e-07	Disintegrin and metalloproteinase domain-containing protein 9 OS=Homo sapiens GN=ADAM9 PE=1 SV=1	PF00413//PF01421//PF07998//PF02031	Matrixin//Reprolysin (M12B) family zinc metalloprotease//Peptidase family M54//Streptomyces extracellular neutral proteinase (M7) family	GO:0006508	proteolysis	GO:0004222//GO:0008270	metalloendopeptidase activity//zinc ion binding	GO:0005576//GO:0031012	extracellular region//extracellular matrix	--	--
Cluster-58773.205168	57.7973	145.047	-1.3274	0.049307	1271	194892152	XP_001977606.1	3.4e-36	GG19136 [Drosophila erecta]>gi|190649255|gb|EDV46533.1| GG19136 [Drosophila erecta]	961096080	XM_014918276.1	0	PREDICTED: Octopus bimaculoides putative sulfiredoxin (LOC106871679), transcript variant X1, mRNA	--	--	--	--	Q9VX10	4.1e-37	Putative sulfiredoxin OS=Drosophila melanogaster GN=CG6762 PE=2 SV=1	--	--	--	--	--	--	--	--	KOG3388	Predicted transcription regulator/nuclease, contains ParB domain
Cluster-58773.120342	25.9775	81.1894	-1.644	0.049488	1858	--	--	--	--	45825211	AC115055.9	3.3742e-06	Mus musculus chromosome 3, clone RP24-346I12, complete sequence	--	--	--	--	--	--	--	--	--	--	--	--	--	--	--	--	--
Cluster-58773.185042	472.246	880.006	-0.89797	0.049496	4925	871211012	XP_005091096.2	2.8e-158	PREDICTED: uncharacterized protein LOC101851784 [Aplysia californica]	961081196	XM_014913102.1	0	PREDICTED: Octopus bimaculoides rho guanine nucleotide exchange factor 28-like (LOC106868006), transcript variant X8, mRNA	--	--	--	--	P0C6P5	9.6e-82	Rho guanine nucleotide exchange factor 28 OS=Rattus norvegicus GN=Arhgef28 PE=1 SV=1	PF00621//PF00628//PF00130	RhoGEF domain//PHD-finger//Phorbol esters/diacylglycerol binding domain (C1 domain)	GO:0035556//GO:0035023//GO:0043087	intracellular signal transduction//regulation of Rho protein signal transduction//regulation of GTPase activity	GO:0005089//GO:0005515	Rho guanyl-nucleotide exchange factor activity//protein binding	--	--	KOG3520	Predicted guanine nucleotide exchange factor
Cluster-58773.179505	137.865	403.855	-15.5367	0.049642	800	--	--	--	--	--	--	--	--	--	--	--	--	--	--	--	PF16276	Nucleophosmin C-terminal domain	--	--	--	--	--	--	--	--
Cluster-58773.187568	0.0001	4.75337	-1.5506	0.049642	1022	--	--	--	--	--	--	--	--	--	--	--	--	--	--	--	--	--	--	--	GO:0003676	nucleic acid binding	--	--	--	--
Cluster-58773.17784	48.1436	131.302	-1.4475	0.049642	1327	524902626	XP_005107542.1	1.7e-83	PREDICTED: mitochondrial peptide methionine sulfoxide reductase-like isoform X1 [Aplysia californica]	961137493	XM_014932736.1	0	PREDICTED: Octopus bimaculoides peptide methionine sulfoxide reductase MsrA 1-like (LOC106882160), transcript variant X4, mRNA	--	--	--	--	Q9UJ68	1.5e-74	Mitochondrial peptide methionine sulfoxide reductase OS=Homo sapiens GN=MSRA PE=1 SV=1	PF01625	Peptide methionine sulfoxide reductase	GO:0006464//GO:0055114	cellular protein modification process//oxidation-reduction process	GO:0008113	peptide-methionine (S)-S-oxide reductase activity	--	--	KOG1635	Peptide methionine sulfoxide reductase
Cluster-58773.135441	579.68	1044.56	-0.84957	0.049642	1703	13516405	BAB40308.1	1.2e-73	minor tachykinin precursor [Callistoctopus minor]	49532657	AB037112.1	0	Octopus vulgaris octtkrpre mRNA for tachykinin-related peptide precursor, complete cds	--	--	--	--	--	--	--	PF07127	Late nodulin protein	GO:0009878	nodule morphogenesis	GO:0046872	metal ion binding	--	--	--	--
Cluster-58773.107073	149.179	318.238	-1.1135	0.049742	2511	762154749	XP_011415453.1	5e-156	PREDICTED: protein spinster homolog 1-like isoform X3 [Crassostrea gigas]	961139203	XM_014933336.1	0	PREDICTED: Octopus bimaculoides protein spinster homolog 1-like (LOC106882598), transcript variant X2, mRNA	--	--	--	--	Q2YDU8	1.3e-122	Protein spinster homolog 1 OS=Rattus norvegicus GN=Spns1 PE=2 SV=2	PF02687//PF07690//PF00083//PF03137	FtsX-like permease family//Major Facilitator Superfamily//Sugar (and other) transporter//Organic Anion Transporter Polypeptide (OATP) family	--	--	GO:0008270	zinc ion binding	--	--	--	--
Cluster-58773.119264	182.093	394.006	-1.0931	0.049742	2106	762168136	XP_011422426.1	3.5e-126	PREDICTED: uncharacterized protein LOC105324889 [Crassostrea gigas]>gi|405962692|gb|EKC28343.1| hypothetical protein CGI_10011565 [Crassostrea gigas]	961106436	XM_014921833.1	0	PREDICTED: Octopus bimaculoides uncharacterized LOC106874178 (LOC106874178), transcript variant X1, mRNA	--	--	--	--	O41933	1.4e-08	E3 ubiquitin-protein ligase MIR1 OS=Murid herpesvirus 4 GN=K3 PE=1 SV=1	PF12906	RING-variant domain	GO:0055085//GO:0006810	transmembrane transport//transport	GO:0022857//GO:0005215	transmembrane transporter activity//transporter activity	GO:0016021//GO:0016020	integral component of membrane//membrane	--	--
Cluster-58773.91472	27.1464	79.3633	-1.5477	0.04989	375	676481935	XP_009062537.1	2.5e-19	hypothetical protein LOTGIDRAFT_166847 [Lottia gigantea]>gi|556098191|gb|ESO86843.1| hypothetical protein LOTGIDRAFT_166847 [Lottia gigantea]	961074426	XM_014933811.1	1.8166e-166	PREDICTED: Octopus bimaculoides dual oxidase maturation factor 1-like (LOC106882947), transcript variant X3, mRNA	--	--	--	--	--	--	--	PF00822//PF10204	PMP-22/EMP/MP20/Claudin family//Dual oxidase maturation factor	GO:0015031	protein transport	--	--	GO:0005789//GO:0016021	endoplasmic reticulum membrane//integral component of membrane	--	--

## Sheet: Up-regulated genes (M vs A)
Differentially up-regulated genes (M vs A)
gene_id	OPM_20_readcount	OPA_20_readcount	log2FoldChange	padj	Gene Length	NR GI	NR ID	NR Evalue	NR Description	NT GI	NT ID	NT Evalue	NT Description	KO ID	KO Name	KO Description	Http Link	Swissprot ID	Swissprot Evalue	Swissprot Description	PFAM ID	PFAM description	Gene Ontology Biological Pathway	BP Description	Gene Ontology Molecular Function	MF Description	Gene Ontology Cellular Component	CC Description	KOG ID	KOG Description
Cluster-58773.192780	1589.34	133.438	3.5742	6.4894e-29	680	198428682	XP_002131590.1	4.1e-12	PREDICTED: uncharacterized protein LOC100183107 [Ciona intestinalis]	961132019	XM_014930846.1	1.26916e-145	PREDICTED: Octopus bimaculoides galaxin-2-like (LOC106880749), transcript variant X2, mRNA	--	--	--	--	D9IQ16	2.6e-09	Galaxin OS=Acropora millepora PE=1 SV=1	--	--	--	--	--	--	--	--	--	--
Cluster-58773.180612	63.0586	0.0001	19.2663	1.5602e-18	3400	871272531	XP_012945368.1	2.3e-180	PREDICTED: phosphatidylinositol 4-phosphate 5-kinase type-1 alpha-like [Aplysia californica]	961140281	XM_014933710.1	0	PREDICTED: Octopus bimaculoides phosphatidylinositol 4-phosphate 5-kinase type-1 alpha-like (LOC106882892), transcript variant X4, mRNA	K00889	PIP5K	1-phosphatidylinositol-4-phosphate 5-kinase	http://www.genome.jp/dbget-bin/www_bget?ko:K00889	Q99755	7.4e-150	Phosphatidylinositol 4-phosphate 5-kinase type-1 alpha OS=Homo sapiens GN=PIP5K1A PE=1 SV=1	PF01504	Phosphatidylinositol-4-phosphate 5-Kinase	GO:0046488	phosphatidylinositol metabolic process	GO:0016307	phosphatidylinositol phosphate kinase activity	--	--	KOG0229	Phosphatidylinositol-4-phosphate 5-kinase
Cluster-58773.78967	718.247	112.286	2.6773	1.5179e-16	1035	60729598		4e-11	galaxin precursor - reef coral>gi|26106077|dbj|BAC41519.1| galaxin [Galaxea fascicularis]	961070606	XM_014920623.1	4.66093e-77	PREDICTED: Octopus bimaculoides galaxin-like (LOC106873307), mRNA	--	--	--	--	D9IQ16	2.2e-12	Galaxin OS=Acropora millepora PE=1 SV=1	--	--	--	--	--	--	--	--	--	--
Cluster-58773.109340	3129.76	42.7708	6.1933	2.9449e-16	659	--	--	--	--	--	--	--	--	--	--	--	--	--	--	--	PF13895	Immunoglobulin domain	--	--	GO:0005515	protein binding	--	--	--	--
Cluster-58773.135076	33.6331	0.0001	18.3595	1.9355e-11	8213	831248978	XP_012669268.1	4.3e-79	PREDICTED: zinc finger protein 208-like [Otolemur garnettii]	961071398	XM_014923355.1	0	PREDICTED: Octopus bimaculoides zinc finger protein 665-like (LOC106875268), mRNA	--	--	--	--	Q5TYW1	2.4e-77	Zinc finger protein 658 OS=Homo sapiens GN=ZNF658 PE=2 SV=2	PF01593//PF04433//PF07992//PF00951//PF01134//PF00070//PF02254//PF01494//PF13465//PF00335//PF02892//PF12831//PF02826//PF06100//PF13241//PF16622//PF05834//PF13912//PF01266//PF04973//PF00096	Flavin containing amine oxidoreductase//SWIRM domain//Pyridine nucleotide-disulphide oxidoreductase//Arterivirus GL envelope glycoprotein//Glucose inhibited division protein A//Pyridine nucleotide-disulphide oxidoreductase//TrkA-N domain//FAD binding domain//Zinc-finger double domain//Tetraspanin family//BED zinc finger//FAD dependent oxidoreductase//D-isomer specific 2-hydroxyacid dehydrogenase,…	GO:0006779//GO:0006631//GO:0006813//GO:0016117//GO:0055114//GO:0034258//GO:0019354//GO:0008033	porphyrin-containing compound biosynthetic process//fatty acid metabolic process//potassium ion transport//carotenoid biosynthetic process//oxidation-reduction process//nicotinamide riboside transport//siroheme biosynthetic process//tRNA processing	GO:0034257//GO:0043115//GO:0051287//GO:0016705//GO:0003677//GO:0005515//GO:0016491//GO:0046872//GO:0050660//GO:0050151//GO:0071949	nicotinamide riboside transmembrane transporter activity//precorrin-2 dehydrogenase activity//NAD binding//oxidoreductase activity, acting on paired donors, with incorporation or reduction of molecular oxygen//DNA binding//protein binding//oxidoreductase activity//metal ion binding//flavin adenine dinucleotide binding//oleate hydratase activity//FAD binding	GO:0016021//GO:0019031//GO:0016020	integral component of membrane//viral envelope//membrane	--	--
Cluster-58773.193553	374.964	3.60589	6.7003	3.5433e-11	325	--	--	--	--	--	--	--	--	--	--	--	--	--	--	--	--	--	--	--	--	--	--	--	--	--
Cluster-58773.245007	53.0252	0.0001	19.0163	1.7577e-10	2213	762146441	XP_011456517.1	4.6e-105	PREDICTED: four-jointed box protein 1-like [Crassostrea gigas]>gi|762146443|ref|XP_011456518.1| PREDICTED: four-jointed box protein 1-like [Crassostrea gigas]>gi|762146445|ref|XP_011456519.1| PREDICTED: four-jointed box protein 1-like [Crassostrea gigas]>gi|762146447|ref|XP_011456520.1| PREDICTED: four-jointed box protein 1-like [Crassostrea gigas]	961104982	XM_014921327.1	0	PREDICTED: Octopus bimaculoides four-jointed box protein 1-like (LOC106873815), mRNA	--	--	--	--	Q5ZEQ8	4.8e-65	Four-jointed box protein 1 OS=Xiphophorus maculatus GN=fjx1 PE=2 SV=1	--	--	--	--	--	--	--	--	--	--
Cluster-58773.68161	63.4764	2.60133	4.6089	2.6266e-10	5442	533138182	XP_005383871.1	8.5e-185	PREDICTED: EGF domain-specific O-linked N-acetylglucosamine transferase isoform X1 [Chinchilla lanigera]>gi|533138184|ref|XP_005383872.1| PREDICTED: EGF domain-specific O-linked N-acetylglucosamine transferase isoform X2 [Chinchilla lanigera]	961114762	XM_014924766.1	0	PREDICTED: Octopus bimaculoides EGF domain-specific O-linked N-acetylglucosamine transferase-like (LOC106876274), transcript variant X1, mRNA	--	--	--	--	Q5NDL2	1.8e-182	EGF domain-specific O-linked N-acetylglucosamine transferase OS=Homo sapiens GN=EOGT PE=1 SV=1	PF05924//PF04577	SAMP Motif//Protein of unknown function (DUF563)	GO:0016055	Wnt signaling pathway	GO:0016757//GO:0008013	transferase activity, transferring glycosyl groups//beta-catenin binding	GO:0016342	catenin complex	KOG4698	Uncharacterized conserved protein
Cluster-58773.193552	47.6628	0.717044	6.0547	5.3173e-10	277	--	--	--	--	--	--	--	--	--	--	--	--	--	--	--	--	--	--	--	--	--	--	--	--	--
Cluster-58773.162596	588.582	151.144	1.9613	1.0611e-09	624	134281	P27011.1	2.5e-80	RecName: Full=S-crystallin 3; AltName: Full=OL3 [Enteroctopus dofleini]>gi|159733|gb|AAA29388.1| S3-crystallin [Enteroctopus dofleini]	961088471	XM_014915635.1	0	PREDICTED: Octopus bimaculoides S-crystallin 3 (LOC106869775), mRNA	--	--	--	--	P27011	1e-81	S-crystallin 3 OS=Enteroctopus dofleini PE=2 SV=1	PF02798//PF13417	Glutathione S-transferase, N-terminal domain//Glutathione S-transferase, N-terminal domain	--	--	GO:0005515	protein binding	--	--	--	--
Cluster-58773.40679	128.709	0.0001	20.2957	1.7232e-09	717	646700730	KDR10756.1	4.7e-43	hypothetical protein L798_15374 [Zootermopsis nevadensis]	961142654	XM_014934539.1	0	PREDICTED: Octopus bimaculoides protein Simiate-like (LOC106883509), mRNA	--	--	--	--	Q28G67	2.4e-42	Protein Simiate OS=Xenopus tropicalis GN=fam206a PE=2 SV=1	--	--	--	--	--	--	--	--	--	--
Cluster-58773.186251	413.399	0.40063	10.011	4.5882e-09	7156	676482024	XP_009062564.1	4.4e-298	hypothetical protein LOTGIDRAFT_194758, partial [Lottia gigantea]>gi|556098221|gb|ESO86873.1| hypothetical protein LOTGIDRAFT_194758, partial [Lottia gigantea]	961091109	XM_014916559.1	0	PREDICTED: Octopus bimaculoides kelch-like protein 9 (LOC106870458), transcript variant X1, mRNA	--	--	--	--	Q80TF4	1e-103	Kelch-like protein 13 OS=Mus musculus GN=Klhl13 PE=2 SV=3	PF01344//PF00651//PF01531//PF03931//PF00297//PF07646	Kelch motif//BTB/POZ domain//Glycosyl transferase family 11//Skp1 family, tetramerisation domain//Ribosomal protein L3//Kelch motif	GO:0006412//GO:0009247//GO:0005975//GO:0006511//GO:0001575//GO:0042254	translation//glycolipid biosynthetic process//carbohydrate metabolic process//ubiquitin-dependent protein catabolic process//globoside metabolic process//ribosome biogenesis	GO:0008107//GO:0005515//GO:0003735	galactoside 2-alpha-L-fucosyltransferase activity//protein binding//structural constituent of ribosome	GO:0016020//GO:0005622//GO:0005840	membrane//intracellular//ribosome	KOG4441	Proteins containing BTB/POZ and Kelch domains, involved in regulatory/signal transduction processes
Cluster-58773.128803	117.988	0.0001	20.1702	6.1347e-09	2387	762106048	XP_011435604.1	3.3e-48	PREDICTED: programmed cell death protein 6-like isoform X1 [Crassostrea gigas]	961080450	XM_014912840.1	0	PREDICTED: Octopus bimaculoides calpain-3-like (LOC106867817), mRNA	--	--	--	--	P12815	5.2e-33	Programmed cell death protein 6 OS=Mus musculus GN=Pdcd6 PE=1 SV=2	PF00036//PF13405//PF13499//PF13833//PF13202	EF hand//EF-hand domain//EF-hand domain pair//EF-hand domain pair//EF hand	--	--	GO:0005509	calcium ion binding	--	--	KOG0037	Ca2+-binding protein, EF-Hand protein superfamily
Cluster-58773.134917	731.68	204.445	1.8395	1.4004e-08	623	297718765	ADI50285.1	1.5e-16	galaxin-like 2 [Acropora millepora]	961132016	XM_014930845.1	2.72678e-82	PREDICTED: Octopus bimaculoides galaxin-2-like (LOC106880749), transcript variant X1, mRNA	--	--	--	--	D9IQ16	9.5e-11	Galaxin OS=Acropora millepora PE=1 SV=1	--	--	--	--	--	--	--	--	--	--
Cluster-58773.212714	2304.81	866.788	1.4109	4.0362e-08	2210	675379694	KFM72596.1	2.9e-14	hypothetical protein X975_16400, partial [Stegodyphus mimosarum]	961120298	XM_014926769.1	0	PREDICTED: Octopus bimaculoides uncharacterized LOC106877760 (LOC106877760), mRNA	--	--	--	--	--	--	--	--	--	--	--	--	--	--	--	--	--
Cluster-58773.162607	821.04	254.719	1.6885	5.5498e-08	1061	2495111	Q25626.1	1.4e-83	RecName: Full=S-crystallin 3 [Octopus vulgaris]>gi|400476|emb|CAA52850.1| S-crystallin [Octopus vulgaris]	961088483	XM_014915641.1	0	PREDICTED: Octopus bimaculoides S-crystallin 3 (LOC106869778), transcript variant X2, mRNA	K01830	E5.3.99.2, PTGDS	prostaglandin-H2 D-isomerase	http://www.genome.jp/dbget-bin/www_bget?ko:K01830	P27014	5.8e-85	S-crystallin 2 OS=Octopus vulgaris GN=OCTS2 PE=2 SV=1	PF13417//PF02798	Glutathione S-transferase, N-terminal domain//Glutathione S-transferase, N-terminal domain	--	--	GO:0005515	protein binding	--	--	--	--
Cluster-58773.109266	1493.08	548.063	1.4459	5.9841e-07	1425	676492769	XP_009066028.1	9.5e-19	hypothetical protein LOTGIDRAFT_236719 [Lottia gigantea]>gi|556094619|gb|ESO83272.1| hypothetical protein LOTGIDRAFT_236719 [Lottia gigantea]	--	--	--	--	--	--	--	--	--	--	--	PF01607	Chitin binding Peritrophin-A domain	GO:0006030	chitin metabolic process	GO:0008061	chitin binding	GO:0005576	extracellular region	--	--
Cluster-58773.104311	258.826	60.3239	2.1012	1.6243e-06	820	--	--	--	--	961120298	XM_014926769.1	3.31907e-147	PREDICTED: Octopus bimaculoides uncharacterized LOC106877760 (LOC106877760), mRNA	--	--	--	--	--	--	--	--	--	--	--	--	--	--	--	--	--
Cluster-58773.162603	810.777	185.785	2.1257	1.8734e-06	373	134281	P27011.1	4.8e-47	RecName: Full=S-crystallin 3; AltName: Full=OL3 [Enteroctopus dofleini]>gi|159733|gb|AAA29388.1| S3-crystallin [Enteroctopus dofleini]	961088486	XM_014915642.1	3.15307e-134	PREDICTED: Octopus bimaculoides S-crystallin 3-like (LOC106869780), mRNA	--	--	--	--	P27011	2e-48	S-crystallin 3 OS=Enteroctopus dofleini PE=2 SV=1	PF13417//PF02798	Glutathione S-transferase, N-terminal domain//Glutathione S-transferase, N-terminal domain	--	--	GO:0005515	protein binding	--	--	--	--
Cluster-58773.179928	20325.9	10752.2	0.91869	2.4261e-06	2670	524892173	XP_005102616.1	2.9e-61	PREDICTED: heterogeneous nuclear ribonucleoprotein A1-like [Aplysia californica]	961096471	XM_014918414.1	0	PREDICTED: Octopus bimaculoides heterogeneous nuclear ribonucleoprotein A1, A2/B1 homolog (LOC106871774), transcript variant X2, mRNA	--	--	--	--	P07909	8.7e-53	Heterogeneous nuclear ribonucleoprotein A1 OS=Drosophila melanogaster GN=Hrb98DE PE=2 SV=1	PF16367//PF08777//PF00076	RNA recognition motif//RNA binding motif//RNA recognition motif. (a.k.a. RRM, RBD, or RNP domain)	--	--	GO:0003723//GO:0003676	RNA binding//nucleic acid binding	--	--	KOG4205	RNA-binding protein musashi/mRNA cleavage and polyadenylation factor I complex, subunit HRP1
Cluster-58773.89227	298.316	4.60724	6.0168	5.5054e-06	3983	749791309	XP_011148852.1	8e-07	PREDICTED: histone-lysine N-methyltransferase SETMAR-like [Harpegnathos saltator]	961139995	XR_001411039.1	1.16304e-38	PREDICTED: Octopus bimaculoides uncharacterized LOC106882822 (LOC106882822), ncRNA	--	--	--	--	Q53H47	7e-06	Histone-lysine N-methyltransferase SETMAR OS=Homo sapiens GN=SETMAR PE=1 SV=2	PF00367	phosphotransferase system, EIIB	GO:0008643	carbohydrate transport	GO:0008982	protein-N(PI)-phosphohistidine-sugar phosphotransferase activity	GO:0009357	protein-N(PI)-phosphohistidine-sugar phosphotransferase complex	--	--
Cluster-58773.202161	757.643	17.4054	5.4439	6.0811e-06	2983	676429203	XP_009045523.1	9.4e-53	hypothetical protein LOTGIDRAFT_203419 [Lottia gigantea]>gi|556115389|gb|ESP04041.1| hypothetical protein LOTGIDRAFT_203419 [Lottia gigantea]	961121042	XM_014927021.1	0	PREDICTED: Octopus bimaculoides ADP-ribosylation factor-like protein 6-interacting protein 1 (LOC106877942), transcript variant X1, mRNA	--	--	--	--	Q9JKW0	1.2e-29	ADP-ribosylation factor-like protein 6-interacting protein 1 OS=Mus musculus GN=Arl6ip1 PE=1 SV=1	PF01771//PF08061	Herpesvirus alkaline exonuclease//P68HR (NUC004) repeat	--	--	GO:0016818//GO:0003724//GO:0003712//GO:0004527//GO:0003677	hydrolase activity, acting on acid anhydrides, in phosphorus-containing anhydrides//RNA helicase activity//transcription cofactor activity//exonuclease activity//DNA binding	GO:0005667//GO:0005634	transcription factor complex//nucleus	--	--
Cluster-58773.104116	775.325	0.0001	22.8864	1.0433e-05	2424	260784632	XP_002587369.1	1e-17	hypothetical protein BRAFLDRAFT_96254 [Branchiostoma floridae]>gi|229272514|gb|EEN43380.1| hypothetical protein BRAFLDRAFT_96254 [Branchiostoma floridae]	961076630	XM_014935503.1	0	PREDICTED: Octopus bimaculoides uncharacterized LOC106884239 (LOC106884239), mRNA	--	--	--	--	Q9Z2D3	5.2e-12	Non-syndromic hearing impairment protein 5 homolog OS=Mus musculus GN=Dfna5 PE=1 SV=1	--	--	--	--	--	--	--	--	--	--
Cluster-58773.106121	57.6739	4.2089	3.7764	1.7195e-05	4877	676482598	XP_009062754.1	1.3e-171	hypothetical protein LOTGIDRAFT_235330 [Lottia gigantea]>gi|556097865|gb|ESO86517.1| hypothetical protein LOTGIDRAFT_235330 [Lottia gigantea]	961124878	XM_014928356.1	0	PREDICTED: Octopus bimaculoides protein Jumonji-like (LOC106878978), transcript variant X4, mRNA	--	--	--	--	Q1LVC2	6.6e-83	Protein Jumonji OS=Danio rerio GN=jarid2b PE=3 SV=2	PF01388	ARID/BRIGHT DNA binding domain	--	--	GO:0003677	DNA binding	--	--	KOG1246	DNA-binding protein jumonji/RBP2/SMCY, contains JmjC domain
Cluster-58773.162583	191.705	32.473	2.5616	1.8234e-05	416	134281	P27011.1	3.7e-64	RecName: Full=S-crystallin 3; AltName: Full=OL3 [Enteroctopus dofleini]>gi|159733|gb|AAA29388.1| S3-crystallin [Enteroctopus dofleini]	961088474	XM_014915636.1	0	PREDICTED: Octopus bimaculoides S-crystallin 2 (LOC106869776), mRNA	--	--	--	--	P27010	5.4e-71	S-crystallin 2 OS=Enteroctopus dofleini PE=2 SV=1	PF13417//PF02798	Glutathione S-transferase, N-terminal domain//Glutathione S-transferase, N-terminal domain	--	--	GO:0005515	protein binding	--	--	--	--
Cluster-58773.158855	28.4267	1.4564	4.2868	2.0965e-05	955	--	--	--	--	--	--	--	--	--	--	--	--	--	--	--	--	--	--	--	--	--	--	--	--	--
Cluster-58773.156855	173.008	42.6285	2.021	2.2994e-05	550	134272	P27013.1	2.7e-06	RecName: Full=S-crystallin 1 [Octopus vulgaris]>gi|9773|emb|CAA46511.1| glutathione S-transferase [Octopus vulgaris]	961088486	XM_014915642.1	1.53222e-34	PREDICTED: Octopus bimaculoides S-crystallin 3-like (LOC106869780), mRNA	--	--	--	--	P27013	1.1e-07	S-crystallin 1 OS=Octopus vulgaris GN=OCTS1 PE=2 SV=1	--	--	--	--	--	--	--	--	--	--
Cluster-58773.134298	2082.75	931.816	19.0616	2.3638e-05	3404	226374647	ACO52475.1	0	RNA transcript variant b adenosine deaminase [Doryteuthis opalescens]	961086908	XM_014915089.1	0	PREDICTED: Octopus bimaculoides double-stranded RNA-specific editase 1-like (LOC106869367), partial mRNA	K13194	ADARB	double stranded RNA-specific editase B	http://www.genome.jp/dbget-bin/www_bget?ko:K13194	Q91ZS8	3.9e-199	Double-stranded RNA-specific editase 1 OS=Mus musculus GN=Adarb1 PE=1 SV=1	PF02137//PF00806//PF16954	Adenosine-deaminase (editase) domain//Pumilio-family RNA binding repeat//Haem-transporter, endosomal/lysosomal, haem-responsive gene	--	--	GO:0016787	hydrolase activity	--	--	KOG2777	tRNA-specific adenosine deaminase 1
Cluster-58773.170299	1028.51	396.765	1.3742	2.3638e-05	1648	871230226	XP_012937528.1	8.2e-107	PREDICTED: ELAV 2-like protein isoform X2 [Aplysia californica]>gi|871230229|ref|XP_012937529.1| PREDICTED: ELAV 2-like protein isoform X2 [Aplysia californica]	961136946	XM_014932553.1	0	PREDICTED: Octopus bimaculoides ELAV-like protein 1 (LOC106882011), transcript variant X2, mRNA	--	--	--	--	Q6GLB5	2.9e-75	ELAV-like protein 1 OS=Xenopus tropicalis GN=elavl1 PE=2 SV=1	PF08777//PF08675//PF00076	RNA binding motif//RNA binding domain//RNA recognition motif. (a.k.a. RRM, RBD, or RNP domain)	GO:0051252//GO:0006402	regulation of RNA metabolic process//mRNA catabolic process	GO:0004535//GO:0046872//GO:0003676//GO:0003723	poly(A)-specific ribonuclease activity//metal ion binding//nucleic acid binding//RNA binding	GO:0005737//GO:0005634	cytoplasm//nucleus	KOG0145	RNA-binding protein ELAV/HU (RRM superfamily)
Cluster-58773.194343	54.7153	0.0001	1.1604	2.3638e-05	1612	762116507	XP_011441091.1	3.1e-82	PREDICTED: ectonucleoside triphosphate diphosphohydrolase 3-like [Crassostrea gigas]>gi|762116509|ref|XP_011441093.1| PREDICTED: ectonucleoside triphosphate diphosphohydrolase 3-like [Crassostrea gigas]	961121647	XM_014927225.1	0	PREDICTED: Octopus bimaculoides ectonucleoside triphosphate diphosphohydrolase 4-like (LOC106878114), mRNA	--	--	--	--	O18956	5.3e-37	Ectonucleoside triphosphate diphosphohydrolase 1 OS=Bos taurus GN=ENTPD1 PE=1 SV=1	PF01150	GDA1/CD39 (nucleoside phosphatase) family	GO:0006807//GO:0015886//GO:0006396//GO:0006144	nitrogen compound metabolic process//heme transport//RNA processing//purine nucleobase metabolic process	GO:0003723//GO:0004000//GO:0015232	RNA binding//adenosine deaminase activity//heme transporter activity	--	--	KOG1386	Nucleoside phosphatase
Cluster-58773.162590	110.984	22.3037	2.315	2.6908e-05	292	134272	P27013.1	6e-45	RecName: Full=S-crystallin 1 [Octopus vulgaris]>gi|9773|emb|CAA46511.1| glutathione S-transferase [Octopus vulgaris]	961088486	XM_014915642.1	6.91863e-110	PREDICTED: Octopus bimaculoides S-crystallin 3-like (LOC106869780), mRNA	--	--	--	--	P27013	2.5e-46	S-crystallin 1 OS=Octopus vulgaris GN=OCTS1 PE=2 SV=1	--	--	--	--	--	--	--	--	--	--
Cluster-58773.213039	40.7395	0.0001	18.6361	3.3244e-05	3390	--	--	--	--	961068660	XM_014914007.1	0	PREDICTED: Octopus bimaculoides transcription factor SPT20 homolog (LOC106868642), mRNA	--	--	--	--	--	--	--	PF11057	Cortexin of kidney	--	--	--	--	GO:0031224	intrinsic component of membrane	--	--
Cluster-81355.2	13.317	0.0001	17.0229	3.9566e-05	5837	676447336	XP_009051375.1	0	hypothetical protein LOTGIDRAFT_152600 [Lottia gigantea]>gi|556108857|gb|ESO97509.1| hypothetical protein LOTGIDRAFT_152600 [Lottia gigantea]	961122826	XM_014927645.1	0	PREDICTED: Octopus bimaculoides doublecortin domain-containing protein 5-like (LOC106878435), partial mRNA	--	--	--	--	Q6ZRR9	6.5e-69	Doublecortin domain-containing protein 5 OS=Homo sapiens GN=DCDC5 PE=2 SV=2	PF03607	Doublecortin	GO:0035556	intracellular signal transduction	--	--	--	--	--	--
Cluster-58773.161885	3476.2	955.544	1.8631	4.5588e-05	760	--	--	--	--	961137777	XM_014932837.1	5.90972e-45	PREDICTED: Octopus bimaculoides shematrin-like protein 1 (LOC106882233), mRNA	--	--	--	--	--	--	--	--	--	--	--	--	--	--	--	--	--
Cluster-58773.167212	92.5223	17.0131	2.4432	5.8699e-05	1160	--	--	--	--	961098186	XM_014919022.1	0	PREDICTED: Octopus bimaculoides uncharacterized LOC106872147 (LOC106872147), mRNA	--	--	--	--	--	--	--	--	--	--	--	--	--	--	--	--	--
Cluster-58773.28221	22.1847	0.0001	17.7592	6.2773e-05	399	751241302	XP_011174736.1	1.7e-10	PREDICTED: uncharacterized protein LOC105206984, partial [Solenopsis invicta]	--	--	--	--	--	--	--	--	--	--	--	--	--	--	--	--	--	--	--	--	--
Cluster-58773.142471	173.774	51.2136	1.7626	7.6712e-05	3806	--	--	--	--	--	--	--	--	--	--	--	--	--	--	--	--	--	--	--	--	--	--	--	--	--
Cluster-58773.234078	23.8761	2.49668	3.2575	7.9947e-05	14833	498979479	XP_004529117.1	1.7e-235	PREDICTED: phosphoenolpyruvate carboxylase-like [Ceratitis capitata]	169757190	CP000949.1	0	Pseudomonas putida W619, complete genome	--	--	--	--	B0KS63	0	Phosphoenolpyruvate carboxylase OS=Pseudomonas putida (strain GB-1) GN=ppc PE=3 SV=1	PF05191//PF00311//PF00975//PF04111//PF01738//PF07859//PF02129//PF00511//PF14010//PF04037//PF08941//PF02224//PF00440//PF10186//PF00326//PF08658	Adenylate kinase, active site lid//Phosphoenolpyruvate carboxylase//Thioesterase domain//Autophagy protein Apg6//Dienelactone hydrolase family//alpha/beta hydrolase fold//X-Pro dipeptidyl-peptidase (S15 family)//E2 (early) protein, C terminal//Phosphoenolpyruvate carboxylase//Domain of unknown function (DUF382)//USP8 interacting//Cytidylate kinase//Bacterial regulatory proteins, tetR family//Vacu…	GO:0010508//GO:0016567//GO:0015977//GO:0019643//GO:0046034//GO:0006275//GO:0006355//GO:0008152//GO:0006206//GO:0006099//GO:0006144//GO:0006508//GO:0006094//GO:0006139//GO:0009058//GO:0006914	positive regulation of autophagy//protein ubiquitination//carbon fixation//reductive tricarboxylic acid cycle//ATP metabolic process//regulation of DNA replication//regulation of transcription, DNA-templated//metabolic process//pyrimidine nucleobase metabolic process//tricarboxylic acid cycle//purine nucleobase metabolic process//proteolysis//gluconeogenesis//nucleobase-containing compound metabo…	GO:0016881//GO:0004127//GO:0016817//GO:0003700//GO:0008236//GO:0016788//GO:0031386//GO:0003677//GO:0016787//GO:0005524//GO:0004017//GO:0008964	acid-amino acid ligase activity//cytidylate kinase activity//hydrolase activity, acting on acid anhydrides//transcription factor activity, sequence-specific DNA binding//serine-type peptidase activity//hydrolase activity, acting on ester bonds//protein tag//DNA binding//hydrolase activity//ATP binding//adenylate kinase activity//phosphoenolpyruvate carboxylase activity	GO:0042025//GO:0005634//GO:0005667	host cell nucleus//nucleus//transcription factor complex	KOG3078	Adenylate kinase
Cluster-58773.184983	140.316	5.70671	4.6199	8.0729e-05	1680	524896294	XP_005104623.1	2.9e-27	PREDICTED: immediate early response 3-interacting protein 1-like [Aplysia californica]	961102599	XM_014920502.1	0	PREDICTED: Octopus bimaculoides immediate early response 3-interacting protein 1-like (LOC106873230), mRNA	--	--	--	--	P85007	1.1e-24	Immediate early response 3-interacting protein 1 OS=Rattus norvegicus GN=Ier3ip1 PE=3 SV=1	--	--	--	--	--	--	--	--	KOG4779	Predicted membrane protein
Cluster-58773.38962	1120.74	335.279	1.741	9.5239e-05	2411	762113053	XP_011439272.1	1e-33	PREDICTED: chorion peroxidase-like [Crassostrea gigas]	961106292	XM_014921779.1	9.37884e-13	PREDICTED: Octopus bimaculoides uncharacterized LOC106874155 (LOC106874155), mRNA	--	--	--	--	Q9VEG6	1.2e-24	Chorion peroxidase OS=Drosophila melanogaster GN=Pxt PE=2 SV=3	--	--	--	--	--	--	--	--	KOG2408	Peroxidase/oxygenase
Cluster-58773.187405	77.477	12.8368	2.5935	0.00011804	334	--	--	--	--	961070606	XM_014920623.1	1.40381e-77	PREDICTED: Octopus bimaculoides galaxin-like (LOC106873307), mRNA	--	--	--	--	--	--	--	--	--	--	--	--	--	--	--	--	--
Cluster-58773.144869	67.5871	10.3429	2.7081	0.00012518	1540	762169223	XP_011423013.1	3.2e-169	PREDICTED: sodium- and chloride-dependent taurine transporter-like isoform X1 [Crassostrea gigas]	961072048	XM_014925737.1	0	PREDICTED: Octopus bimaculoides sodium- and chloride-dependent taurine transporter-like (LOC106876957), transcript variant X2, mRNA	--	--	--	--	O18875	1.3e-141	Sodium- and chloride-dependent creatine transporter 1 OS=Bos taurus GN=SLC6A8 PE=2 SV=1	PF00209//PF00119	Sodium:neurotransmitter symporter family//ATP synthase A chain	GO:0006812//GO:0015986//GO:0015992//GO:0006836	cation transport//ATP synthesis coupled proton transport//proton transport//neurotransmitter transport	GO:0005328//GO:0015078	neurotransmitter:sodium symporter activity//hydrogen ion transmembrane transporter activity	GO:0016021	integral component of membrane	KOG3660	Sodium-neurotransmitter symporter
Cluster-58773.169431	27578.1	16232.1	0.76468	0.00016384	1971	50080844	AAT69739.1	5.6e-70	tropomysin-like protein [Todarodes pacificus]	961090883	XM_014916477.1	0	PREDICTED: Octopus bimaculoides tropomyosin-2-like (LOC106870414), mRNA	--	--	--	--	P43689	3.8e-21	Tropomyosin-2 OS=Biomphalaria glabrata PE=2 SV=1	PF08702//PF10473//PF04728//PF06160//PF04420//PF11365//PF04111//PF02601//PF07926//PF02388//PF14073//PF00038//PF06009//PF16716//PF03938//PF04871//PF05557	Fibrinogen alpha/beta chain family//Leucine-rich repeats of kinetochore protein Cenp-F/LEK1//Lipoprotein leucine-zipper//Septation ring formation regulator, EzrA//CHD5-like protein//Protein of unknown function (DUF3166)//Autophagy protein Apg6//Exonuclease VII, large subunit//TPR/MLP1/MLP2-like protein//FemAB family//Centrosome localisation domain of Cep57//Intermediate filament protein//Laminin …	GO:0051607//GO:0051258//GO:0006886//GO:0007165//GO:0010506//GO:0015031//GO:0000921//GO:0009252//GO:0030168//GO:0071816//GO:0006914//GO:0007094//GO:0007155//GO:0006606//GO:0006308	defense response to virus//protein polymerization//intracellular protein transport//signal transduction//regulation of autophagy//protein transport//septin ring assembly//peptidoglycan biosynthetic process//platelet activation//tail-anchored membrane protein insertion into ER membrane//autophagy//mitotic spindle assembly checkpoint//cell adhesion//protein import into nucleus//DNA catabolic process	GO:0008855//GO:0045502//GO:0042802//GO:0008565//GO:0051082//GO:0042803//GO:0005102//GO:0005198//GO:0016755//GO:0008134//GO:0043015//GO:0030674	exodeoxyribonuclease VII activity//dynein binding//identical protein binding//protein transporter activity//unfolded protein binding//protein homodimerization activity//receptor binding//structural molecule activity//transferase activity, transferring amino-acyl groups//transcription factor binding//gamma-tubulin binding//protein binding, bridging	GO:0005737//GO:0016021//GO:0005667//GO:0009318//GO:0019867//GO:0016020//GO:0045298//GO:0005940//GO:0005577//GO:0030286//GO:0005615//GO:0005882	cytoplasm//integral component of membrane//transcription factor complex//exodeoxyribonuclease VII complex//outer membrane//membrane//tubulin complex//septin ring//fibrinogen complex//dynein complex//extracellular space//intermediate filament	KOG1003	Actin filament-coating protein tropomyosin
Cluster-58773.162617	273.489	86.2424	1.665	0.00017222	551	167642858	ABZ89822.1	2.2e-24	S-crystallin short transcript variant 1a [Octopus bimaculoides]>gi|167642860|gb|ABZ89823.1| S-crystallin short transcript variant 1b [Octopus bimaculoides]	167642857	EU436143.1	1.69966e-143	Octopus bimaculoides S-crystallin short transcript variant 1a mRNA, partial cds, alternatively spliced	--	--	--	--	P27014	1.6e-25	S-crystallin 2 OS=Octopus vulgaris GN=OCTS2 PE=2 SV=1	--	--	--	--	--	--	--	--	--	--
Cluster-58773.83736	34.2108	3.09485	3.4665	0.00018761	659	641649257	XP_008185321.1	1.1e-33	PREDICTED: uncharacterized protein LOC103310050 [Acyrthosiphon pisum]	961084467	XR_001409337.1	8.75765e-23	PREDICTED: Octopus bimaculoides uncharacterized LOC106868801 (LOC106868801), transcript variant X1, ncRNA	--	--	--	--	--	--	--	PF08142	AARP2CN (NUC121) domain	GO:0042254	ribosome biogenesis	--	--	GO:0005634	nucleus	--	--
Cluster-58773.79972	22.7197	1.42662	3.9933	0.00019482	765	676478235	XP_009061367.1	8.9e-24	hypothetical protein LOTGIDRAFT_126895, partial [Lottia gigantea]>gi|556099405|gb|ESO88057.1| hypothetical protein LOTGIDRAFT_126895, partial [Lottia gigantea]	961089880	XM_014916125.1	0	PREDICTED: Octopus bimaculoides solute carrier family 22 member 8-like (LOC106870133), transcript variant X1, mRNA	--	--	--	--	Q8HY24	2.3e-11	Solute carrier family 22 member 8 OS=Oryctolagus cuniculus GN=SLC22A8 PE=2 SV=1	PF07690	Major Facilitator Superfamily	GO:0055085	transmembrane transport	--	--	GO:0016021	integral component of membrane	KOG0255	Synaptic vesicle transporter SVOP and related transporters (major facilitator superfamily)
Cluster-58773.182412	20184.3	11699.2	0.78683	0.00022211	3827	871222689	XP_012936132.1	7.6e-281	PREDICTED: filamin-A-like [Aplysia californica]	961138655	XM_014933140.1	0	PREDICTED: Octopus bimaculoides filamin-A-like (LOC106882456), partial mRNA	--	--	--	--	Q9VEN1	1.8e-189	Filamin-A OS=Drosophila melanogaster GN=cher PE=1 SV=2	PF08039	Mitochondrial proteolipid	--	--	--	--	GO:0005739	mitochondrion	--	--
Cluster-58773.124625	2192.58	1029.93	16.8105	0.00024435	791	--	--	--	--	--	--	--	--	--	--	--	--	--	--	--	--	--	GO:0006139//GO:0006614//GO:0006206//GO:0006355//GO:0015937//GO:0015940	nucleobase-containing compound metabolic process//SRP-dependent cotranslational protein targeting to membrane//pyrimidine nucleobase metabolic process//regulation of transcription, DNA-templated//coenzyme A biosynthetic process//pantothenate biosynthetic process	GO:0016301//GO:0005524//GO:0098519//GO:0003924//GO:0008134//GO:0043531//GO:0005525//GO:0004140//GO:0004127//GO:0016887	kinase activity//ATP binding//nucleotide phosphatase activity, acting on free nucleotides//GTPase activity//transcription factor binding//ADP binding//GTP binding//dephospho-CoA kinase activity//cytidylate kinase activity//ATPase activity	GO:0005667	transcription factor complex	--	--
Cluster-58773.163198	11.4938	0.0001	1.0901	0.00024435	1922	871272625	XP_012945392.1	9.5e-131	PREDICTED: adenylate kinase 8-like [Aplysia californica]	961100143	XM_014919633.1	0	PREDICTED: Octopus bimaculoides adenylate kinase-like (LOC106872597), transcript variant X2, mRNA	--	--	--	--	P00569	1e-55	Adenylate kinase isoenzyme 1 OS=Oryctolagus cuniculus GN=AK1 PE=1 SV=1	PF00005//PF03266//PF14532//PF00448//PF01443//PF03193//PF00931//PF06414//PF02224//PF00004//PF01121	ABC transporter//NTPase//Sigma-54 interaction domain//SRP54-type protein, GTPase domain//Viral (Superfamily 1) RNA helicase//Protein of unknown function, DUF258//NB-ARC domain//Zeta toxin//Cytidylate kinase//ATPase family associated with various cellular activities (AAA)//Dephospho-CoA kinase	--	--	--	--	--	--	KOG3079	Uridylate kinase/adenylate kinase
Cluster-58773.169439	10578.5	5919.39	0.83761	0.00024561	904	--	--	--	--	961090883	XM_014916477.1	0	PREDICTED: Octopus bimaculoides tropomyosin-2-like (LOC106870414), mRNA	--	--	--	--	--	--	--	--	--	--	--	--	--	--	--	--	--
Cluster-58773.86002	19.6456	0.0001	17.5838	0.00028116	5250	762112479	XP_011438981.1	1.4e-131	PREDICTED: protocadherin gamma-A7-like isoform X1 [Crassostrea gigas]	961099521	XM_014919417.1	0	PREDICTED: Octopus bimaculoides protocadherin-11 X-linked-like (LOC106872422), transcript variant X1, mRNA	--	--	--	--	Q6KEQ9	6.2e-95	Protocadherin-11 X-linked OS=Sus scrofa GN=PCDH11X PE=2 SV=1	PF00028	Cadherin domain	GO:0007156	homophilic cell adhesion via plasma membrane adhesion molecules	GO:0005509	calcium ion binding	GO:0016020	membrane	--	--
Cluster-58773.161510	418.01	118.999	1.8126	0.00029564	1343	759033058	XP_011341879.1	3.1e-11	PREDICTED: putative uncharacterized protein FLJ37770 [Cerapachys biroi]	--	--	--	--	--	--	--	--	--	--	--	PF08052	PyrBI operon leader peptide	GO:0019856	pyrimidine nucleobase biosynthetic process	--	--	--	--	--	--
Cluster-58773.197443	931.169	402.192	1.2112	0.0003868	1002	--	--	--	--	--	--	--	--	--	--	--	--	--	--	--	PF08039	Mitochondrial proteolipid	--	--	--	--	GO:0005739	mitochondrion	--	--
Cluster-58773.113777	666.317	265.28	1.3287	0.00040234	1858	524869977	XP_005091776.1	2.8e-127	PREDICTED: cartilage oligomeric matrix protein-like [Aplysia californica]	961100720	XM_014919838.1	0	PREDICTED: Octopus bimaculoides cartilage oligomeric matrix protein-like (LOC106872747), mRNA	--	--	--	--	P49744	6.1e-122	Thrombospondin-4 OS=Rattus norvegicus GN=Thbs4 PE=1 SV=1	PF17056//PF02412//PF05735	Killer toxin-resistance protein 1//Thrombospondin type 3 repeat//Thrombospondin C-terminal region	GO:0031505//GO:0007155	fungal-type cell wall organization//cell adhesion	GO:0005509	calcium ion binding	GO:0005576	extracellular region	--	--
Cluster-58773.153970	14.2235	0.0001	17.1179	0.00048287	2159	762131990	XP_011449176.1	1.3e-176	PREDICTED: eukaryotic translation initiation factor 3 subunit C-like isoform X1 [Crassostrea gigas]	961110189	XM_014923134.1	0	PREDICTED: Octopus bimaculoides eukaryotic translation initiation factor 3 subunit C-like (LOC106875141), mRNA	--	--	--	--	Q3SYW6	4.9e-163	Eukaryotic translation initiation factor 3 subunit C OS=Bos taurus GN=EIF3C PE=2 SV=1	PF05470	Eukaryotic translation initiation factor 3 subunit 8 N-terminus	GO:0006413//GO:0006446	translational initiation//regulation of translational initiation	GO:0003743//GO:0031369	translation initiation factor activity//translation initiation factor binding	GO:0005840//GO:0005852	ribosome//eukaryotic translation initiation factor 3 complex	KOG1076	Translation initiation factor 3, subunit c (eIF-3c)
Cluster-58773.78165	210.438	63.6498	1.7252	0.0007424	4314	676442079	XP_009049693.1	5.2e-28	hypothetical protein LOTGIDRAFT_173664 [Lottia gigantea]>gi|556110948|gb|ESO99599.1| hypothetical protein LOTGIDRAFT_173664 [Lottia gigantea]	961133471	XM_014931350.1	0	PREDICTED: Octopus bimaculoides uncharacterized LOC106881110 (LOC106881110), transcript variant X3, mRNA	--	--	--	--	--	--	--	PF09788	Transmembrane protein 55A	GO:0046856	phosphatidylinositol dephosphorylation	GO:0034597	phosphatidylinositol-4,5-bisphosphate 4-phosphatase activity	--	--	--	--
Cluster-58773.30252	38.8859	1.44432	4.7508	0.00074539	2296	--	--	--	--	961106495	XM_014921852.1	0	PREDICTED: Octopus bimaculoides origin recognition complex subunit 6-like (LOC106874197), mRNA	--	--	--	--	--	--	--	PF04556	DpnII restriction endonuclease	GO:0006308//GO:0009307	DNA catabolic process//DNA restriction-modification system	GO:0009036//GO:0003677	Type II site-specific deoxyribonuclease activity//DNA binding	GO:0009359	Type II site-specific deoxyribonuclease complex	--	--
Cluster-58773.144457	32.8372	3.38818	3.2767	0.00081234	1989	677420557	KFQ24656.1	7.5e-06	hypothetical protein N332_04238, partial [Mesitornis unicolor]	--	--	--	--	--	--	--	--	--	--	--	PF14659	Phage integrase, N-terminal SAM-like domain	GO:0015074	DNA integration	GO:0003677	DNA binding	--	--	--	--
Cluster-58773.97415	356.797	61.0569	2.5469	0.00082006	539	2495111	Q25626.1	1e-18	RecName: Full=S-crystallin 3 [Octopus vulgaris]>gi|400476|emb|CAA52850.1| S-crystallin [Octopus vulgaris]	961088474	XM_014915636.1	1.41705e-74	PREDICTED: Octopus bimaculoides S-crystallin 2 (LOC106869776), mRNA	--	--	--	--	P27010	5.1e-21	S-crystallin 2 OS=Enteroctopus dofleini PE=2 SV=1	--	--	--	--	--	--	--	--	--	--
Cluster-58773.216935	985.116	440.237	1.162	0.00085216	3729	676471706	XP_009059258.1	0	hypothetical protein LOTGIDRAFT_192362 [Lottia gigantea]>gi|556101536|gb|ESO90188.1| hypothetical protein LOTGIDRAFT_192362 [Lottia gigantea]	961095971	XM_014918238.1	0	PREDICTED: Octopus bimaculoides exportin-5-like (LOC106871654), mRNA	--	--	--	--	Q9HAV4	7.6e-273	Exportin-5 OS=Homo sapiens GN=XPO5 PE=1 SV=1	PF03810//PF05983	Importin-beta N-terminal domain//MED7 protein	GO:0006886//GO:0006357	intracellular protein transport//regulation of transcription from RNA polymerase II promoter	GO:0008536//GO:0001104	Ran GTPase binding//RNA polymerase II transcription cofactor activity	GO:0016592	mediator complex	KOG2020	Nuclear transport receptor CRM1/MSN5 (importin beta superfamily)
Cluster-58773.208260	80.5095	17.3022	2.2182	0.00087674	3148	676495494	XP_009066910.1	3.4e-109	hypothetical protein LOTGIDRAFT_170033 [Lottia gigantea]>gi|556093753|gb|ESO82406.1| hypothetical protein LOTGIDRAFT_170033 [Lottia gigantea]	961074018	XM_014932377.1	0	PREDICTED: Octopus bimaculoides uncharacterized LOC106881850 (LOC106881850), transcript variant X2, mRNA	--	--	--	--	--	--	--	--	--	--	--	--	--	--	--	--	--
Cluster-58773.25116	32.1099	3.7004	3.1173	0.0010177	1159	675381634	KFM74536.1	1.3e-10	Transposable element Tcb2 transposase, partial [Stegodyphus mimosarum]	--	--	--	--	--	--	--	--	--	--	--	--	--	--	--	--	--	--	--	--	--
Cluster-58773.191785	9.48805	0.0001	16.5338	0.0010763	758	--	--	--	--	--	--	--	--	--	--	--	--	--	--	--	PF04272	Phospholamban	GO:0006816//GO:0006810	calcium ion transport//transport	GO:0005246//GO:0042030	calcium channel regulator activity//ATPase inhibitor activity	GO:0016020	membrane	--	--
Cluster-58773.159312	12942.7	7659.35	0.75684	0.0011046	1258	405958653	EKC24761.1	2.9e-48	hypothetical protein CGI_10006272 [Crassostrea gigas]	961111238	XM_014923498.1	0	PREDICTED: Octopus bimaculoides putative uncharacterized oxidoreductase YDR541C (LOC106875389), partial mRNA	--	--	--	--	--	--	--	PF02862//PF02932	DDHD domain//Neurotransmitter-gated ion-channel transmembrane region	GO:0006811	ion transport	GO:0046872	metal ion binding	GO:0016020	membrane	--	--
Cluster-58773.133362	429.868	143.669	1.5811	0.0011815	1032	339013169	AEJ33823.1	7.5e-58	triosephosphate isomerase [Octopus bimaculoides]	946725745	KT007222.1	0	Amphioctopus fangsiao triose phosphate isomerase mRNA, complete cds	--	--	--	--	P30741	3.7e-52	Triosephosphate isomerase OS=Culex tarsalis GN=Tpi PE=1 SV=2	--	--	--	--	--	--	--	--	KOG1643	Triosephosphate isomerase
Cluster-58773.214472	17.1052	0.0001	17.3841	0.0011833	2656	--	--	--	--	--	--	--	--	--	--	--	--	--	--	--	PF01484	Nematode cuticle collagen N-terminal domain	--	--	GO:0042302	structural constituent of cuticle	--	--	--	--
Cluster-58773.237979	20.6882	0.0001	17.6585	0.0014113	2065	557147754	CDJ42846.1	1.6e-06	Zgc:136380, related [Eimeria tenella]	--	--	--	--	--	--	--	--	--	--	--	--	--	--	--	--	--	--	--	--	--
Cluster-58773.68537	1394.3	683.566	1.0284	0.0014843	2209	676438247	XP_009048467.1	4e-101	hypothetical protein LOTGIDRAFT_200644 [Lottia gigantea]>gi|556112187|gb|ESP00839.1| hypothetical protein LOTGIDRAFT_200644 [Lottia gigantea]	961075576	XM_014935143.1	0	PREDICTED: Octopus bimaculoides D-3-phosphoglycerate dehydrogenase-like (LOC106883983), mRNA	--	--	--	--	Q61753	6.9e-96	D-3-phosphoglycerate dehydrogenase OS=Mus musculus GN=Phgdh PE=1 SV=3	PF03446//PF03160//PF00389//PF02254//PF02826	NAD binding domain of 6-phosphogluconate dehydrogenase//Calx-beta domain//D-isomer specific 2-hydroxyacid dehydrogenase, catalytic domain//TrkA-N domain//D-isomer specific 2-hydroxyacid dehydrogenase, NAD binding domain	GO:0019521//GO:0007154//GO:0006813//GO:0006098//GO:0008152//GO:0055114	D-gluconate metabolic process//cell communication//potassium ion transport//pentose-phosphate shunt//metabolic process//oxidation-reduction process	GO:0051287//GO:0004616//GO:0016616	NAD binding//phosphogluconate dehydrogenase (decarboxylating) activity//oxidoreductase activity, acting on the CH-OH group of donors, NAD or NADP as acceptor	GO:0016021	integral component of membrane	KOG0068	D-3-phosphoglycerate dehydrogenase, D-isomer-specific 2-hydroxy acid dehydrogenase superfamily
Cluster-126466.0	45.1537	6.11622	2.8841	0.0016684	1766	--	--	--	--	--	--	--	--	--	--	--	--	--	--	--	--	--	--	--	--	--	--	--	--	--
Cluster-58773.211195	2706.99	1418.89	0.93193	0.0016689	3631	780046533	XP_011668921.1	1.4e-34	PREDICTED: uncharacterized protein LOC100891970 isoform X3 [Strongylocentrotus purpuratus]>gi|780046540|ref|XP_011668922.1| PREDICTED: uncharacterized protein LOC100891970 isoform X3 [Strongylocentrotus purpuratus]	961093210	XM_014917271.1	0	PREDICTED: Octopus bimaculoides deoxyribonuclease gamma-like (LOC106871016), transcript variant X1, mRNA	--	--	--	--	Q13609	7.2e-34	Deoxyribonuclease gamma OS=Homo sapiens GN=DNASE1L3 PE=1 SV=1	PF02873	UDP-N-acetylenolpyruvoylglucosamine reductase, C-terminal domain	GO:0055114//GO:0006040	oxidation-reduction process//amino sugar metabolic process	GO:0008762	UDP-N-acetylmuramate dehydrogenase activity	--	--	--	--
Cluster-58773.199446	69.8774	14.4164	2.2771	0.0017289	1218	871264364	XP_012943797.1	2.8e-104	PREDICTED: collagen alpha-3(VI) chain-like isoform X6 [Aplysia californica]	961139246	XM_014933351.1	0	PREDICTED: Octopus bimaculoides collagen alpha-3(VI) chain-like (LOC106882611), partial mRNA	--	--	--	--	Q8C6K9	1.6e-46	Collagen alpha-6(VI) chain OS=Mus musculus GN=Col6a6 PE=1 SV=2	PF13291	ACT domain	GO:0008152	metabolic process	GO:0016597	amino acid binding	--	--	--	--
Cluster-58773.201646	120.382	34.6217	1.7979	0.0018966	988	--	--	--	--	--	--	--	--	--	--	--	--	--	--	--	--	--	--	--	--	--	--	--	--	--
Cluster-58773.194808	15.6545	0.0001	17.2562	0.0020223	4462	762105293	XP_011435210.1	7.9e-229	PREDICTED: anoctamin-8-like isoform X3 [Crassostrea gigas]	961128661	XM_014929664.1	0	PREDICTED: Octopus bimaculoides anoctamin-8-like (LOC106879914), transcript variant X2, mRNA	--	--	--	--	Q6PB70	4.6e-131	Anoctamin-8 OS=Mus musculus GN=Ano8 PE=1 SV=3	PF16178	Dimerisation domain of Ca+-activated chloride-channel, anoctamin	--	--	GO:0046983	protein dimerization activity	--	--	KOG2513	Protein required for meiotic chromosome segregation
[truncated: 177 more rows]

## Sheet: GO enrichment down-regulated
GO enrichment analysis in down-regulated genes (M vs A)
[truncated: 1,746 more rows]

## Sheet: GO enrichment up-regulated
GO enrichment analysis in up-regulated genes (M vs A)
[truncated: 1,327 more rows]
