# Supplementary material for: Proteogenomic Study of the Effect of an Improved Mixed Diet of Live Preys on the Aquaculture of Octopus vulgaris Paralarvae
Source: Frontiers journal article supplement (doi:10.3389/fmars.2021.817701), 2022-02-17
Supplement: Table_3.XLSX [file Table_3.XLSX]

## Sheet: Supplementary Table 3A
Supplementary Table 3A. Individual normalized values of the 2,341 quantified proteins by SWATH-MS analysis for O. vulgaris 20 days post-hatching paralarvae fed on mix (OPM_20, n= 6) and Artemia diet (OPA_20, n=6).
gi/UniProt accession	Protein name [species]	OPM_20_1	OPM_20_2	OPM_20_3	OPM_20_4	OPM_20_5	OPM_20_6	OPA_20_1	OPA_20_2	OPA_20_3	OPA_20_4	OPA_20_5	OPA_20_6
321468619	chymotrypsin-like protein [Daphnia pulex]	169992	41988.2	66315.7	12851.7	40837.2	23417.5	5293.15	9124.36	10316.4	10585.7	4750.06	11477.7
676490520	hypothetical protein LOTGIDRAFT_203267 [Lottia gigantea]	28455.1	20218.8	7172.17	25569.5	26047.8	11785.8	2655.98	14726.4	5356.08	3146.61	2019.24	4594.35
871250970	LIM and SH3 domain protein 1[Aplysia californica]	68365.8	70792.1	40626	56833.4	85293.3	25781.1	13127.3	35863.6	10729.1	19947.5	19284.4	26598
755981826	PREDICTED: serine/threonine-protein kinase mig-15 isoform X10 [Fopius arisanus]	9830.76	7824.31	8778.66	11445	15997.4	11034.6	856.893	7994.59	838.452	7789.1	3807.21	4166.06
556759982	PREDICTED: ATP synthase subunit alpha, mitochondrial-like [Pantholops hodgsonii]	25657.2	3744.46	7335.55	9392.09	5470.85	5370.74	5228.98	20676.6	180181	157113	10869.5	5522.15
762129940	PREDICTED: titin-like isoform X6 [Crassostrea gigas]	448877	392998	372760	586213	646108	389993	160086	358639	176179	220381	148975	212906
P42281	ACBP_DROME Acyl-CoA-binding protein homolog OS=Drosophila melanogaster GN=Dbi PE=2 SV=1	6276.76	1588.7	3635.22	27008	1021.29	17652.7	21936	70280.4	70809.3	144055	1220.95	54318.4
676423133	hypothetical protein LOTGIDRAFT_228067 [Lottia gigantea]	78321.3	57556.7	67625.9	81343.1	97624.2	42645	28690.5	62179.6	20171	36713.8	22040.6	29049.8
815907918	PREDICTED: SAFB-like transcription modulator isoform X1 [Bombus impatiens]	29257.2	22304.5	20842.2	24013.4	25586.9	13651.3	9685.66	18112.6	10423.1	11118.5	5578.32	9169.96
678200283	Vitellogenin-2, partial [Picoides pubescens]	10603.4	9891.18	10918	7783.3	13021.2	10351.1	4956.79	2793.65	7862.96	2483.74	5351.35	6177.58
405974565	RNA-binding protein 4 [Crassostrea gigas]	566563	487349	432672	686803	655338	310067	185263	458818	162078	266047	174093	269964
321450742	hypothetical protein DAPPUDRAFT_300850 [Daphnia pulex]	12141.5	32527.8	14380.3	35322.2	23879.3	26732.7	23349.2	19828.6	387034	276591	12551.5	23410.4
676492747	hypothetical protein LOTGIDRAFT_133731 [Lottia gigantea]	103019	96753.4	110039	84909.9	111877	47543.8	33588.7	68807.6	42660.9	34885.6	47362.6	41175.3
321459212	hypothetical protein DAPPUDRAFT_300540 [Daphnia pulex]	14299.8	3140.14	5224.63	9028.24	9023.82	13872.3	10080.8	23292.8	97141	87139.5	2649.21	30681.1
762106002	PREDICTED: uncharacterized protein LOC105334014 isoform X3 [Crassostrea gigas]	173279	122440	115561	207316	183346	123897	63703.5	105708	68493.5	83653	50707	85273.4
Q9IBG7	KCP_XENLA Kielin/chordin-like protein OS=Xenopus laevis GN=kcp PE=2 SV=1	58731.6	44200.7	40206.3	42930.4	58562.9	33752.2	36305	20641.5	22835.1	11443.9	25916.6	22045.7
321476143	myosin heavy chain isoform 1 [Daphnia pulex]	138909	89369.5	136836	592365	67068.3	333767	349103	531223	1.38904e+06	2.21704e+06	179425	531511
524898135	PREDICTED: ras GTPase-activating-like protein IQGAP1 isoform X4 [Aplysia californica]	1126.45	728.897	1540.06	8811.63	9461.2	1968.99	17688.5	5767.09	22232.7	13894.7	25836.5	2330.96
676464632	hypothetical protein LOTGIDRAFT_162734 [Lottia gigantea]	34862.7	55376.8	41680.6	48858.9	73280.1	45447.6	92603.1	109302	121952	136952	60092.9	78281
321475548	myosin essential light chain [Daphnia pulex]	30964.9	15256.7	34475	35305	25254.7	15089.3	27576.6	74601	152558	252697	33529	23759.9
395395171	caspase 3 [Cynops orientalis]	10406	160018	149126	285650	256203	272129	298977	355976	456765	429696	279403	462375
405964948	Fructose-bisphosphate aldolase [Crassostrea gigas]	12274.4	40089.1	32329.3	294694	193645	554326	961823	15322.8	774989	293973	1.21632e+06	426936
1697406406	3-oxoacyl-[acyl-carrier-protein] reductase FabG[Octopus sinensis]	5506.53	6118.46	11236.5	6415.33	4424.57	8601.15	17704.5	14045.6	12215	11290.6	13980.7	17010.7
676476535	hypothetical protein LOTGIDRAFT_219163 [Lottia gigantea]	52326.9	152649	182030	35367.4	44945.4	164044	397929	99957.7	372992	245469	535303	383896
595744435	chitotriosidase [Euprymna scolopes]	97146.7	46690.2	5116.76	23188.7	6638.18	5500.6	1861.89	51186.2	54779.9	69921.2	72082.9	319864
1697419816	Delta-1-pyrroline-5-carboxylate synthase [Octopus sinensis]	2328.64	30864.2	23089.9	22582.2	25393.2	23754.2	50093.9	51418.8	43318.7	29383.1	43249.6	45018.6
557765833	PREDICTED: fructose-bisphosphate aldolase isoform X1 [Musca domestica]	43917.7	47283.4	99084.7	80210.8	59096.4	59664.9	93357.4	131199	429668	386658	56419.3	77226.3
357625105	transgelin [Danaus plexippus]	4076.74	2538.48	5604.63	9466.75	4435.29	1926.61	8334.63	11223.2	29968.3	18518.5	1344.83	9267.8
157824041	receptor-interacting serine/threonine-protein kinase 1 [Rattus norvegicus]	10965.5	1524.85	30755.6	27294.4	34184.9	11633.9	73919.9	24764.8	34548.8	29546.5	10382.2	149931
456359321	Carbonic anhydrase [ Crassostrea gigas]	1653.91	15173.5	29976	13368.5	15088.8	35277.8	35787.4	37368.6	43554.6	30953.1	43222.3	35903.8
351542162	ribosomal protein S5-like [Danio rerio]	7791.3	3314.37	3258.49	8007.07	17602.3	15573.6	9969.84	11857.4	58590.2	61677	839.675	6935.96
1314481	serine collagenase 1 precursor [Uca pugilator]	80831.1	16777.6	12263.4	93697.4	12217	140636	107576	175973	238827	285037	34480.4	115917
676452477	hypothetical protein LOTGIDRAFT_94382, partial [Lottia gigantea]	68803.6	93511.4	56654.1	103013	98365.8	130059	124966	210769	205931	216770	197552	176003
676431169	hypothetical protein LOTGIDRAFT_171717 [Lottia gigantea]	91128.6	18943.4	37415.1	17307.8	5660.44	23658.2	107570	86412.7	121098	17621.3	63230.8	109756
321458683	hypothetical protein DAPPUDRAFT_300691 [Daphnia pulex]	20721	15605	6826.8	32990.5	18017.3	18416.5	17975.1	31407.5	103277	107112	13746.9	17835.9
346685078	superoxidase dismutase [Eisenia fetida]	41491	40828	21661.2	103543	38361.2	65280.7	94479.6	164540	135908	262982	37631.6	108029
762127166	Calcium load-activated calcium channel [Aplysia californica]	78497.6	88884.3	74745.3	152134	144915	93201.5	184123	191762	246827	259294	213293	234912
676469579	hypothetical protein LOTGIDRAFT_227532 [Lottia gigantea]	29539.6	36028.2	7738.25	30940.3	33205.1	52559.3	59527.5	57002.9	76208.8	63749.7	74094	70809.3
405954235	Adipophilin [Crassostrea gigas]	75553.4	70069.9	73219.4	74356.1	70081.5	88260.4	156242	146338	201432	227857	77588.3	144578
88657469	hemocyanin subunit 2 [Sepia officinalis]	453941	777928	793673	321062	277986	917527	1.84196e+06	605012	1.59484e+06	840336	2.2636e+06	1.22122e+06
597787176	PREDICTED: cell wall protein PRY3-like [Astyanax mexicanus]	43764	6139.42	10777.7	62910.3	49021.9	40386.5	47237.5	87514.4	110542	102524	38584.1	106855
762116501	PREDICTED: collagen alpha-4(VI) chain-like [Crassostrea gigas]	70216.7	296882	169307	50681.1	98944.5	95968.3	276144	185692	362081	271703	374553	325081
762109059	PREDICTED: solute carrier family 12 member 2-like isoform X2 [Crassostrea gigas]	35843	59464.6	5736.81	9092.89	7543.45	43240.6	68664.2	74923.4	36532.5	45387.8	49880.7	93501.2
676478714	hypothetical protein LOTGIDRAFT_127065 [Lottia gigantea]	7847.08	36433.1	17183.2	13869.6	16583.3	10842.7	51615.8	31818.2	26911.8	12207.4	73257	38109.4
405966888	Collagen alpha-3(VI) chain [Crassostrea gigas]	193029	237655	242808	137800	231488	197147	461319	344323	426840	438123	544375	412901
283837550	serine protease 1 [Heterololigo bleekeri]	230304	443380	286817	112390	167109	334999	660396	339816	484925	520988	981087	471217
260797277	hypothetical protein BRAFLDRAFT_284130 [Branchiostoma floridae]	2843.53	2520.16	2814.51	908.454	1715.82	7764.93	9017.19	6803.43	8894.43	1066.23	7977.16	7525.49
871252834	Calcium load-activated calcium channel [Aplysia californica]	7810.27	23381.1	14297.6	4161.2	21207.5	19775.8	36749.1	35775.1	36674.6	31310.9	34916.8	25220
827883539	beta arrestin [Idiosepius paradoxus]	11860.5	21083.7	49635.6	16573.7	8537.92	22717.2	56356.6	30832.2	58125.3	37808.9	60556.5	50755.7
780172842	PREDICTED: LOW QUALITY PROTEIN: deleted in malignant brain tumors 1 protein [Strongylocentrotus purpuratus]	20437.5	69659.5	35532.9	20004.8	24695.4	23304.6	92683.2	18869.4	93171.5	50241.1	126936	41417.6
632957619	PREDICTED: caspase-1-like [Callorhinchus milii]	9034.59	4110.56	3085.38	54207.1	28940.8	24334.6	27597.1	76740.6	46298.8	61969.4	11767.1	42463.6
871230952	PREDICTED: calcium-dependent secretion activator 1-like isoform X6 [Aplysia californica]	9003.92	2915.9	8809.76	156.565	602.093	12677.4	12860.9	10647.1	15429.6	11847	13782.9	8412.4
676494434	hypothetical protein LOTGIDRAFT_205920 [Lottia gigantea]	3381.99	3342.13	6000.27	4238.28	5303.91	7698.6	14461.5	14686.1	10788.3	10396.8	7002.87	10518.2
762127168	glutamine--fructose-6-phosphate aminotransferase [isomerizing] 1 isoform X6 [Crassostrea gigas]	120036	149050	136841	90178.5	96957.7	173307	295937	148531	386563	287183	341733	377043
1697453666	Cartilage matrix protein-like[Octopus sinensis]	203415	282221	351102	70821.1	75445.5	284978	774830	332192	420648	383201	601440	541303
762116501	PREDICTED: collagen alpha-4(VI) chain-like [Crassostrea gigas]	229835	415979	567005	85178	138884	376466	1.23207e+06	476041	595784	592938	776588	836033
675885906	hypothetical protein HELRODRAFT_186101 [Helobdella robusta]	8122.66	3765.57	19034.4	3993.28	1292.51	8946.91	20994.7	12704.5	14238.7	13360.6	14571.6	18978.5
762157792	PREDICTED: serine/threonine-protein phosphatase 2A 55 kDa regulatory subunit B alpha isoform-like [Crassostrea gigas]	1746.72	5831.27	15721.9	2422.57	1945.69	700.186	13832.9	7062.29	9445.88	8505.82	10096.7	10230.9
524867640	PREDICTED: NADP-dependent malic enzyme-like [Aplysia californica]	164177	267149	349649	108725	93813.3	278627	512596	212269	479465	314483	619337	481355
676455968	hypothetical protein LOTGIDRAFT_117600, partial [Lottia gigantea]	10506.7	11826	14509.4	7022.9	2923.93	12636.2	18031.2	11680.7	21043.6	11964.9	31000.7	29107
762144498	PREDICTED: uncharacterized protein LOC105347952 [Crassostrea gigas]	10073.2	8874.3	18278.9	1190.55	2190.84	15770.9	22318.4	22396.3	16947.5	20711.2	13440.4	20595.3
575498399	acetylcholinesterase [Octopus vulgaris]	9841.51	17050.4	23011.1	7968.05	4440.18	15369.9	30551.5	8188.42	29227.4	20902.8	44919.8	26039.8
1697376434	UPF0462 protein C4orf33 homolog isoform X3 [Octopus sinensis]	59662.9	137179	47906.5	135296	132562	133092	174776	287397	355341	296025	253720	335633
573887259	PREDICTED: tyrosine--tRNA ligase, cytoplasmic-like [Lepisosteus oculatus]	43057.7	28118.4	61414.2	28916	30727.4	71884.5	131952	127459	151329	88844.4	135503	91307.4
321478948	hypothetical protein DAPPUDRAFT_230075 [Daphnia pulex]	6389.59	1974.13	4567.05	3087.89	20176.3	3623.55	16380.9	10233.8	8965.26	18226.4	9820.34	18044.2
676437410	hypothetical protein LOTGIDRAFT_238345, partial [Lottia gigantea]	1674.13	14648.2	24862	1255.39	2521.18	12390.9	17718.6	9753.74	23830.3	15561	28378.4	22365.5
1697419007	Golgi-associated plant pathogenesis-related protein 1 [Octopus sinensis]	6876.42	11750.3	4067.77	51922.3	44241.7	34939.5	56199.1	69466.8	109370	87288.7	45596.8	100781
676455112	hypothetical protein LOTGIDRAFT_215045 [Lottia gigantea]	1637.89	4198.09	9835.22	1441.06	5526.85	11322.2	11178.7	10465.1	14411.5	12455.2	10563.4	10403.1
762147726	PREDICTED: uncharacterized protein LOC105349184 [Crassostrea gigas]	39122	81404.4	71037.5	9391.14	13170.3	35375.4	102631	42220	97436.8	72144.2	115421	80149.5
158286242	Nucleoside diphosphate kinase [Anopheles gambiae str. PEST]	4402.55	22237.9	18279.7	36159.5	7415.7	31991.2	46848.6	63064.8	86983.8	113295	23038.8	56337.3
524898597	PREDICTED: 3'(2'),5'-bisphosphate nucleotidase 1-like isoform X1 [Aplysia californica]	16575.6	34937.2	45103.5	5431.08	15067.9	23897.3	53945.1	35503.9	52461.9	29970.1	67212.8	48319.4
676472365	hypothetical protein LOTGIDRAFT_204295 [Lottia gigantea]	1718.9	12518.9	21233.5	7640.81	11872.7	12775.2	24098	4757.54	31275.8	14825.9	45589.7	16615.3
676479144	hypothetical protein LOTGIDRAFT_127363 [Lottia gigantea]	60588.9	44272.3	66665.1	25576.2	37950.2	42202.3	282557	75633.4	124806	135889	187011	175403
676485144	hypothetical protein LOTGIDRAFT_130303, partial [Lottia gigantea]	34293.5	167752	60868.6	56705.8	107215	85141.1	335884	213352	333502	268178	363795	363845
157908370	astacin-like squid metalloprotease type I [Sepioteuthis lessoniana]	26544	28028.6	30318	22183.8	11107.8	34128.6	64139	45200.7	48509.2	40288.6	56066.8	47763.5
676489169	hypothetical protein LOTGIDRAFT_222130 [Lottia gigantea]	61004.1	45383.7	70581.8	39623.9	32714.7	80356.7	142352	60017.9	104954	80561.5	120380	143754
646713004	Putative cysteine proteinase [Zootermopsis nevadensis]	47141.8	46057.5	29585.9	26458.5	22389.6	61919.3	94453	70597.8	90815.9	78273.3	58328.5	68109.3
676459271	hypothetical protein LOTGIDRAFT_175527 [Lottia gigantea]	84087.4	66563.5	173087	105812	67510	109192	206594	97495.3	276197	102337	248182	256770
762154995	PREDICTED: transforming growth factor-beta-induced protein ig-h3-like [Crassostrea gigas]	3693.76	13112.9	8731.03	6347.42	7150.69	13165.4	17555.3	23801.6	15157.1	10385.4	17173.7	18071.3
676487585	hypothetical protein LOTGIDRAFT_236007 [Lottia gigantea]	7183.67	26972.4	29448.9	12958.8	12518.5	21927.3	39690.7	20350.6	38775.6	32009.3	43247	42497.6
676490199	hypothetical protein LOTGIDRAFT_211007 [Lottia gigantea]	9086.22	47737.9	52624.7	16251.6	10702.4	37626.2	51340.6	41636.6	57334.3	57975.7	67627.7	63557.1
762128137	PREDICTED: trifunctional enzyme subunit beta, mitochondrial-like [Crassostrea gigas]	48904.6	73678.2	80592.3	68624.9	30802	66524	104973	152964	110258	71502.8	193050	87102.4
676495464	hypothetical protein LOTGIDRAFT_134745 [Lottia gigantea]	733475	722761	675665	312581	355566	1.00255e+06	1.22e+06	703754	1.48127e+06	1.01264e+06	1.59564e+06	1.39159e+06
92110434	Chit3 protein [Crassostrea gigas]	164131	232001	178728	115637	151803	185963	304928	293345	349102	331461	341233	371679
762136897	PREDICTED: 6-phosphogluconate dehydrogenase, decarboxylating-like [Crassostrea gigas]	306507	470631	473793	269995	254718	482778	613681	486781	899046	691691	889329	776244
443700700	hypothetical protein CAPTEDRAFT_222768 [Capitella teleta]	64801.2	99238.2	158038	67934.6	72786.6	143138	220050	88118.5	224708	186118	219646	228312
260825249	hypothetical protein BRAFLDRAFT_261932 [Branchiostoma floridae]	3161.39	1224.52	19777.6	8455.87	2512.94	3277.8	26893.1	3084.03	11606.7	9175.48	14810.7	8234.28
676495464	hypothetical protein LOTGIDRAFT_134745 [Lottia gigantea]	579750	677022	747203	253475	248523	755525	1.13414e+06	513512	1.06006e+06	912559	1.40116e+06	1.22599e+06
676493445	hypothetical protein LOTGIDRAFT_223003 [Lottia gigantea]	6145.55	7400.49	9564.79	5053.57	5221.08	15559.9	16524.4	6997.42	22192.3	17827.5	21023.7	8811.4
443697890	hypothetical protein CAPTEDRAFT_129515, partial [Capitella teleta]	77237.6	6067.38	369075	1831.19	10112.2	24020.6	335447	86855.3	35609.3	9410.81	168459	282278
676459799	hypothetical protein LOTGIDRAFT_153262 [Lottia gigantea]	1331.24	15745.1	17951.7	8350.31	7265.82	12838.7	21767.1	9776.64	21471	16461.3	28865.8	20876.6
P11413	G6PD_HUMAN Glucose-6-phosphate 1-dehydrogenase OS=Homo sapiens GN=G6PD PE=1 SV=4	109068	126077	164190	58975.6	65940.9	133958	205525	94569	221035	196721	279896	233009
405974136	Putative chitinase 3 [Crassostrea gigas]	74379	117790	59059	25937	64494.2	56240.9	122541	100068	133462	118048	132718	135182
762092086	PREDICTED: periostin-like [Crassostrea gigas]	1.14338e+06	1.55527e+06	1.4002e+06	635471	934078	1.34282e+06	2.31354e+06	2.13177e+06	1.92359e+06	1.97241e+06	2.60243e+06	2.12887e+06
524870945	PREDICTED: probable NADH dehydrogenase [ubiquinone] 1 alpha subcomplex subunit 12 [Aplysia californica]	6683.26	22846.8	9033.06	8050.44	6508.17	21617.7	28672.6	21918	30442.4	16854.6	34226.8	6983.46
676429700	hypothetical protein LOTGIDRAFT_237604 [Lottia gigantea]	29585.1	29644.3	32006.8	9708.92	9042.65	22317.9	54683.9	18479.9	39972.8	30942.3	57181.8	42605.8
762151514	PREDICTED: microsomal triglyceride transfer protein large subunit-like [Crassostrea gigas]	82489	109177	100538	40810.3	31531	99237.9	191147	87590.9	166963	99910.5	182131	125962
676459779	hypothetical protein LOTGIDRAFT_228561 [Lottia gigantea]	44717.6	97205.8	95676.2	17788.7	29407.7	55046.8	143849	58853	125600	75881.2	134557	86428.1
871256694	PREDICTED: serine palmitoyltransferase 2-like [Aplysia californica]	30416.6	24923.6	60518.3	7751.48	13597.5	27102	74842.1	9036.65	51523.9	36749.7	78301.2	51568.9
676459779	hypothetical protein LOTGIDRAFT_228561 [Lottia gigantea]	273604	396585	368871	74649.3	199421	281976	582786	289242	604089	383524	691095	378319
762103124	PREDICTED: long-chain-fatty-acid--CoA ligase 1-like isoform X3 [Crassostrea gigas]	71457.1	209607	183953	59629.2	58054	148797	291262	83324	244899	170411	338842	211587
762155994	PREDICTED: xaa-Pro aminopeptidase 1-like isoform X2 [Crassostrea gigas]	22215.2	51875.2	67257.2	12533.1	7998.06	50357.3	88746.6	24571	69999.8	23731.7	111703	70104.2
676460842	hypothetical protein LOTGIDRAFT_215949 [Lottia gigantea]	57119.1	45669.8	47211.9	8940.78	21327.9	46685.2	82921.2	53394.9	65394.2	63829.9	84620.1	65223.7
524900991	PREDICTED: leukotriene A-4 hydrolase-like isoform X2 [Aplysia californica]	19290.3	22204.6	28813	4873.34	6318.27	20044.2	36888.1	13488.3	43834.6	17799.6	26992.8	46678
762092088	PREDICTED: transforming growth factor-beta-induced protein ig-h3-like [Crassostrea gigas]	319984	582974	479325	216063	306041	531908	888612	620214	439374	661890	954494	884159
524895394	PREDICTED: enoyl-CoA delta isomerase 2, mitochondrial-like isoform X1 [Aplysia californica]	89880.4	125216	149773	91038.3	74941.7	145821	257311	126649	233025	171093	238068	204809
762106408	PREDICTED: arginine--tRNA ligase, cytoplasmic-like [Crassostrea gigas]	41269.2	75425.8	99975.6	25707.2	57654.1	50254.4	115471	53743.5	109403	87411	140366	130618
676475684	hypothetical protein LOTGIDRAFT_234443 [Lottia gigantea]	23417	92382.3	100800	16540.6	23525.9	66164.3	106805	71278.7	128005	42864.3	125627	110831
524894332	PREDICTED: 40S ribosomal protein S23 [Aplysia californica]	100254	142729	127911	45078.9	47604.6	109962	176396	150872	204157	145366	190511	171567
283837552	serine protease 2 [Heterololigo bleekeri]	121564	176171	141631	129082	113688	147092	214179	299698	184926	230185	261091	309497
676489500	hypothetical protein LOTGIDRAFT_196756 [Lottia gigantea]	202615	331717	391247	104345	81180	300392	487025	201037	457798	368982	566775	462211
524888420	PREDICTED: dolichyl-diphosphooligosaccharide--protein glycosyltransferase subunit 2-like isoform X1 [Aplysia californica]	438783	762743	934084	208731	280227	626640	1.12863e+06	615785	1.0718e+06	818802	1.26806e+06	947042
321478948	hypothetical protein DAPPUDRAFT_230075 [Daphnia pulex]	457831	171428	56689.1	114426	128370	627343	369980	711206	503252	551137	279048	380365
676491388	hypothetical protein LOTGIDRAFT_132933 [Lottia gigantea]	13302.3	9775.14	20088.7	2046.58	9172.45	16571.5	21057	15003.6	23296.4	15186.3	32681	20138.3
676494493	hypothetical protein LOTGIDRAFT_184590 [Lottia gigantea]	47519.2	65725.3	99629.3	2952.8	34515.2	70010.4	112613	40286.2	98724.1	74592.7	139557	108657
762124933	PREDICTED: BAG family molecular chaperone regulator 3-like isoform X2 [Crassostrea gigas]	2200.51	14112.5	12836.8	12548.9	13663.1	19825.3	18679.7	29764.2	24326.4	24253.4	20763.5	16950.9
762072186	PREDICTED: lysosome membrane protein 2-like [Crassostrea gigas]	4459.87	18301.8	23110.3	14603	10021.3	1655.02	26795.9	14876.4	17273.4	21712.4	26328.9	21962.2
762116501	PREDICTED: collagen alpha-4(VI) chain-like [Crassostrea gigas]	158660	325824	403776	146846	217509	238989	551440	226752	469473	408873	694002	314792
871265728	PREDICTED: putative glutamate synthase [NADPH] [Aplysia californica]	7188.17	13645.4	17114.1	3470.02	2623.76	10543.6	21380.3	1685.01	21230.6	9833.2	23778.5	19460.8
762153786	PREDICTED: long-chain fatty acid transport protein 4-like [Crassostrea gigas]	80010.1	119362	167931	31143	34586.3	100265	219619	44240.2	176992	133604	222879	153622
762104199	PREDICTED: multifunctional protein ADE2-like [Crassostrea gigas]	48969.7	71128.3	65864.6	22158.4	21462.1	69412.1	97560.1	35199.2	100234	75826.6	100011	122730
524909813	PREDICTED: succinyl-CoA:3-ketoacid coenzyme A transferase 1, mitochondrial-like [Aplysia californica]	110775	143513	201499	63939.9	51168	150272	215167	135658	211182	195873	270485	252992
52550954	hemocyanin A-type [Enteroctopus dofleini]	7229.1	18127.1	28778.8	4687.41	8886.13	5697.11	25210.7	13159.1	23066.8	12515.8	32633.1	23260.9
23598405	ganglioside GM2 activator precursor [Euprymna scolopes]	236383	510374	412526	188754	426958	505184	695674	479399	748488	788281	518474	801619
762161922	PREDICTED: glutamine synthetase-like [Crassostrea gigas]	84316.8	234769	174587	51649.3	47488.8	188547	270843	144622	242211	214453	299374	209193
676474843	hypothetical protein LOTGIDRAFT_183268 [Lottia gigantea]	1692.92	17661.4	20580.3	5875.13	9661.27	17152.7	23416.1	13196.8	23214.5	16817.3	28023.9	23478.8
15128054	AF393635_1 visual arrestin [Doryteuthis pealeii]	50580.7	53058.2	57119.2	10184.8	17324.2	42009.8	76717.8	30324.5	78476.1	51038.6	104092	64650.9
Q5R8Y6	TM9S2_PONAB Transmembrane 9 superfamily member 2 OS=Pongo abelii GN=TM9SF2 PE=2 SV=1	21133.4	6918.9	20197.3	9799.06	14004.7	18792.7	35031.1	4302.79	30621.1	24730.3	34128.8	31025.1
762103698	PREDICTED: ruvB-like 2 [Crassostrea gigas]	12822	18172.1	30430.1	23896.8	18777.9	26387.6	42349.7	40592.8	36945.6	42869.9	33881.1	32763.8
524891488	PREDICTED: uncharacterized protein LOC101847669 isoform X2 [Aplysia californica]	5898.69	31201.7	22554.4	100793	1625.3	3644.25	43700.4	54014.5	56526.5	43953.6	42027.6	50918.9
646714086	Stress-activated protein kinase JNK [Zootermopsis nevadensis]	56476.3	39202.6	49534	6207.71	14560.6	33288.2	52516.4	84837.9	40833.7	46840.8	69780.7	52210
762151209	PREDICTED: aspartate aminotransferase, mitochondrial-like, partial [Crassostrea gigas]	650457	992147	1.21946e+06	277121	365203	829296	1.36118e+06	751700	1.38729e+06	968857	1.78185e+06	1.28392e+06
443697228	hypothetical protein CAPTEDRAFT_20019 [Capitella teleta]	16699	18536.5	22827.2	5822.73	2814.33	14572.4	28194.3	32241.7	14862.5	15302.3	32057.2	18408.8
762092217	PREDICTED: uncharacterized protein LOC105329078 isoform X2 [Crassostrea gigas]	148431	174353	209109	101786	99679.8	80006.5	378638	137065	207257	242804	234705	211002
871221218	PREDICTED: echinoderm microtubule-associated protein-like 2 [Aplysia californica]	109902	160791	205751	34420.8	55543.6	166582	230416	46105.6	259763	186906	310746	233456
676494948	hypothetical protein LOTGIDRAFT_197848 [Lottia gigantea]	90939.3	130872	183063	81299.8	41996.1	153898	239877	106239	223733	154915	243438	210378
190609994	TPA: SCO-spondin precursor [Tetraodon nigroviridis]	511825	93016.8	79993.6	298468	233063	825195	590829	145854	962479	428637	280822	1.10889e+06
734630788	PREDICTED: dihydrolipoyl dehydrogenase, mitochondrial isoform X1 [Larimichthys crocea]	366642	530219	655804	189045	213166	571567	768900	455898	818189	558294	1.00488e+06	746049
405951079	D-beta-hydroxybutyrate dehydrogenase, mitochondrial [Crassostrea gigas]	27046.6	12598.8	35024.9	6201.51	19052.2	18267.5	29858.3	38831	31219.6	39877.8	50886.8	12909.5
676467270	hypothetical protein LOTGIDRAFT_209535 [Lottia gigantea]	23294.6	25110.9	24782.3	10138.7	15928	23675	37787.3	64311	25020.4	23601.6	29336	31669.3
676486982	hypothetical protein LOTGIDRAFT_235910 [Lottia gigantea]	161816	189772	213614	99912.5	87379.6	202060	310809	135484	317462	182841	392897	302762
676437414	hypothetical protein LOTGIDRAFT_225472 [Lottia gigantea]	17193.2	51176.2	46226.7	42281.7	56497.3	40265.1	77496.4	81668.5	69518.3	64030.1	65310.5	77257.8
675863458	hypothetical protein HELRODRAFT_156976 [Helobdella robusta]	269503	434106	518973	183268	132321	400168	584652	164359	608041	484789	898365	576151
676443716	hypothetical protein LOTGIDRAFT_142111 [Lottia gigantea]	74823.2	108352	129285	62596.8	82095	111161	155687	115491	198002	153068	212682	137039
676425562	hypothetical protein LOTGIDRAFT_177715 [Lottia gigantea]	268706	428487	498705	133470	127877	301188	613495	266003	595989	353491	757169	420718
675873362	hypothetical protein HELRODRAFT_84056 [Helobdella robusta]	14175.9	15899.4	14823.3	11043.2	5862.15	7885.59	19521.3	23297.5	17983.4	18366.8	22295.7	17597.3
762070306	PREDICTED: piwi-like protein 1 isoform X2 [Crassostrea gigas]	19512.1	34299.8	42383.1	5868.45	9800.88	23937.6	43239	10668.5	44637.9	34286	57232.1	41549.7
390365203	PREDICTED: dehydrogenase/reductase SDR family member 1 [Strongylocentrotus purpuratus]	7350.23	20319	57966.4	36864.3	44680.8	58050.8	59601.2	29530.1	80868.3	66617	69409.3	78091.3
Q9WV54	ASAH1_MOUSE Acid ceramidase OS=Mus musculus GN=Asah1 PE=1 SV=1	130385	109987	102338	91987.2	59397.2	130827	191426	129844	193568	158894	151217	237916
156366225	predicted protein [Nematostella vectensis]	75281.8	54482.1	70848.9	51718.2	76212	89211.3	118014	122401	130641	118066	109680	111525
676478671	hypothetical protein LOTGIDRAFT_166205 [Lottia gigantea]	17364.4	17944.8	32704.8	6171.09	2496.08	18408.4	36198.7	16376.3	23279.2	25845.2	35667.4	23803.1
676457308	hypothetical protein LOTGIDRAFT_227335 [Lottia gigantea]	10024.8	21709.8	42724.7	16570.7	12514.2	32911.3	39536.3	39209.2	60340	12643.9	51904.1	27641
147900644	carboxypeptidase A1 (pancreatic) precursor [Xenopus laevis]	124489	175348	209924	72695.3	81269.9	114788	291277	145427	189730	231817	236292	219282
676472734	hypothetical protein LOTGIDRAFT_218637 [Lottia gigantea]	5682.84	17086.3	14082.6	9095.06	8835.17	12080.7	22944.9	12895.9	23016.9	6511.49	21059.4	26333.5
260816654	hypothetical protein BRAFLDRAFT_266349 [Branchiostoma floridae]	72498	90761.1	111591	57549.4	54100.4	71077.2	133994	63525.3	138254	120665	164751	150212
762151331	PREDICTED: uncharacterized protein LOC105318300 [Crassostrea gigas]	10793.9	33991.5	26557.5	41462.8	24338.6	18647.3	44572.1	41108.1	51318.4	37989.6	48870.2	38674
348505116	PREDICTED: asparagine--tRNA ligase, cytoplasmic-like [Oreochromis niloticus]	10821.7	44101.5	42046.1	15662.8	26028.5	9085.03	56060.2	32050.1	37436	41879.7	42212.9	39297.2
676478548	hypothetical protein LOTGIDRAFT_234865 [Lottia gigantea]	1.17563e+06	790156	814545	1.56637e+06	1.40822e+06	1.80847e+06	1.54011e+06	1.91345e+06	2.56405e+06	2.24038e+06	1.79565e+06	2.67589e+06
291224559	PREDICTED: methylmalonic aciduria and homocystinuria type C protein homolog [Saccoglossus kowalevskii]	6223.49	43280.6	44745.2	88711	62318.7	76157.2	75040.8	80650	114056	126004	59403.6	84347.6
762098431	PREDICTED: UDP-N-acetylhexosamine pyrophosphorylase-like isoform X4 [Crassostrea gigas]	270629	210103	195782	342667	290750	308796	401709	313666	568759	493730	470610	460724
595744435	chitotriosidase [Euprymna scolopes]	219401	111673	164926	49091.8	52912.8	97749.5	297858	82031.5	150863	151614	308804	172830
558122328	PREDICTED: caspase-7 [Myotis lucifugus]	3140.52	2030.09	12684.2	2240.9	4212.25	8953.15	4328.02	12411	12709	5458.86	14713.9	5806.8
676472476	hypothetical protein LOTGIDRAFT_234113 [Lottia gigantea]	17265.7	24507.2	20753.6	9309.45	8135.93	14753.9	27776.5	19086.1	33746.4	21863.8	32114.3	23043.1
676484289	hypothetical protein LOTGIDRAFT_235630 [Lottia gigantea]	315862	397526	398601	255834	281081	448224	683747	649185	469232	570712	626717	488058
443697831	hypothetical protein CAPTEDRAFT_160246 [Capitella teleta]	66224	67023.2	40426.4	44307.8	72477.2	74099.1	99830.9	93173.8	102301	81408.3	134828	94202.4
762090756	PREDICTED: transketolase-like protein 2 isoform X1 [Crassostrea gigas]	1.82174e+06	2.17274e+06	2.88145e+06	749888	723514	1.7999e+06	2.89487e+06	1.13502e+06	3.04011e+06	2.57691e+06	4.17391e+06	3.0391e+06
Q8JZQ2	AFG32_MOUSE AFG3-like protein 2 OS=Mus musculus GN=Afg3l2 PE=1 SV=1	27302.8	38583.7	42383.6	15304.8	16808.8	33074.6	56207.7	27567.9	49411.5	42241	70590.5	41774.4
676458953	hypothetical protein LOTGIDRAFT_118711, partial [Lottia gigantea]	4840.43	3583.58	10554.2	3044.84	4721.64	6407.41	11670	2008.21	9192.36	5249.42	14667	12170
405964213	Sulfotransferase family cytosolic 1B member 1 [Crassostrea gigas]	21687.4	45991.2	26597.3	23877.8	52975.8	40278.8	51174.1	84411.9	69696.8	37410.5	50827.6	56584.4
676450606	hypothetical protein LOTGIDRAFT_231728 [Lottia gigantea]	3385.13	4354.85	9011.83	1587.75	2059.84	6347	11923.5	1265.16	8868.81	4145.1	11073.7	6996.43
762080935	PREDICTED: alpha-aminoadipic semialdehyde synthase, mitochondrial-like isoform X1 [Crassostrea gigas]	51418.7	78237	87224.4	37555.1	45063.6	78040.9	108033	73686.1	109928	78382.6	141291	111799
126697460	ribosomal protein l [Haliotis discus discus]	37076	89259.4	129541	28267.1	32579.2	72696.8	135127	65703.5	113814	72638.5	150254	104288
291234107	PREDICTED: retinal dehydrogenase 1-like [Saccoglossus kowalevskii]	37925.4	43319.5	48339.1	21064.9	16228.1	28061.5	52925.9	29268.2	54524.2	43613.4	83053.8	57669.8
399932281	LAP3 [Tegillarca granosa]	73001.6	76338.3	99475.9	32369.4	38002.7	32320.5	107573	64270	97620.1	94215.4	111620	103519
321473500	hypothetical protein DAPPUDRAFT_314798 [Daphnia pulex]	26491	68141.8	66566	36493.7	14417.3	68988.2	79653.2	67843.7	82226.4	77179.1	84396.2	71380.1
524878582	PREDICTED: dolichyl-diphosphooligosaccharide--protein glycosyltransferase subunit STT3B-like isoform X1 [Aplysia californica]	30758.6	65225.5	69278.7	29859.7	7152.25	66875.1	100673	28996.1	85925.4	70428.2	90933	65923.7
451899172	peroxiredoxin-4 [Amphioctopus fangsiao]	85000.8	96632.1	149809	53225.1	32550.7	107587	178294	86577.4	157467	87062.8	188001	165131
524868121	PREDICTED: uncharacterized protein C167.05-like [Aplysia californica]	6162.94	28701.8	42345.9	25631.8	16969	41972	48779.6	28389.7	42659.1	48008.4	52771.4	45068.6
676453990	hypothetical protein LOTGIDRAFT_214791 [Lottia gigantea]	62789.8	91860.5	47177.3	34160.8	64724.7	66319.9	126748	73336	142936	91728.2	102584	65290.6
524895425	PREDICTED: copine-3-like [Aplysia californica]	19935.3	74289.8	71408.4	44259.2	40550.2	87594.6	110260	59467.8	117045	69183.4	95502.3	102259
871221218	PREDICTED: echinoderm microtubule-associated protein-like 2 [Aplysia californica]	112212	81498.9	114600	43289.8	28197.7	83633.9	141481	28599.9	142572	121507	179047	144625
218944225	cathepsin D [Azumapecten farreri]	2.06611e+06	2.66646e+06	2.53527e+06	1.45534e+06	1.98363e+06	2.32456e+06	3.62245e+06	3.37063e+06	4.05201e+06	2.96984e+06	3.82119e+06	3.39545e+06
762163513	PREDICTED: protein-glutamine gamma-glutamyltransferase K-like isoform X1 [Crassostrea gigas]	10686.1	3242.56	36244.9	295.719	2797.64	4830.91	10774.9	5654.74	22609.9	9583.28	12976.4	32881.4
871254924	PREDICTED: probable cytosolic oligopeptidase A [Aplysia californica]	2698.28	7863.13	10709.5	7799	2772.11	11585.8	10293.5	9589.74	17603.4	10561.3	12476	10031.7
498948271	PREDICTED: NADH dehydrogenase [ubiquinone] 1 alpha subcomplex subunit 11 [Ceratitis capitata]	39265.1	48027.2	63458.9	15310.4	29841.7	28685.3	76098.3	48724.4	49020.8	51085.6	74407.4	65317.6
676450606	hypothetical protein LOTGIDRAFT_231728 [Lottia gigantea]	153605	200343	254578	79024.9	80720	185201	317722	168515	271687	197909	324413	264372
762162034	PREDICTED: protein disulfide-isomerase A4-like isoform X2 [Crassostrea gigas]	94275.9	118468	128275	40340.7	48689.3	103745	155444	111043	164460	113342	190095	128291
762122488	PREDICTED: clathrin heavy chain 1 isoform X1 [Crassostrea gigas]	286980	374083	534003	188242	247265	375952	654405	235846	603810	471754	737248	538286
23096074	myosinase-I [Todarodes pacificus]	21352.9	28782.1	28295.8	2521.8	14072.7	16139.3	33007.1	35887.9	23186.3	38711.2	26922.3	21837.9
405971611	V-type proton ATPase subunit B [Crassostrea gigas]	680950	813096	951293	292941	237729	902945	1.17211e+06	737614	1.11299e+06	834726	1.34403e+06	1.05476e+06
871251757	PREDICTED: protein yellow-like [Aplysia californica]	12846.9	24605.8	17230.5	11681.4	17938.4	27524.1	31877.6	28787.8	37239.9	18473.3	28338.3	35601.2
762154295	PREDICTED: bleomycin hydrolase-like [Crassostrea gigas]	244033	314622	442712	166360	158357	268698	489796	306416	416056	361775	527574	466342
762095603	PREDICTED: WD repeat-containing protein 55-like isoform X1 [Crassostrea gigas]	7114.48	17464.2	29219.6	13303.2	7770.33	19677.5	28610.2	18230.2	29819.3	12122.9	36559.5	26871
828199149	PREDICTED: E3 ubiquitin-protein ligase MIB1 isoform X1 [Hydra vulgaris]	111013	44324.3	22946.2	279203	245575	144518	137646	195017	242344	415506	91602.1	281912
443711424	hypothetical protein CAPTEDRAFT_211623 [Capitella teleta]	109054	262170	392635	444681	626785	347622	665841	777942	501031	603537	520888	443518
676480461	hypothetical protein LOTGIDRAFT_177468 [Lottia gigantea]	1.33209e+06	2.01864e+06	2.01113e+06	890845	843737	1.63127e+06	2.64019e+06	1.72534e+06	2.4554e+06	1.96227e+06	3.15533e+06	2.10238e+06
762157831	PREDICTED: gastric triacylglycerol lipase-like [Crassostrea gigas]	103516	134981	57515.8	121846	127903	96123.4	269238	80509.6	224597	140468	138681	178238
676465609	hypothetical protein LOTGIDRAFT_233275 [Lottia gigantea]	75534.8	101973	106758	43597.1	47287.7	83002.5	160757	79045	133111	97594.3	144983	120493
762093144	PREDICTED: tyrosine-protein phosphatase Lar-like isoform X5 [Crassostrea gigas]	16249	37434.9	43136.2	12649.7	13122.2	26931	42142.1	14619.1	41987.3	31156.1	53409.3	56124.2
405967713	4-coumarate--CoA ligase [Crassostrea gigas]	33037.7	134138	116080	64678.6	64237.6	113611	144375	132058	175283	123223	139127	125893
699581942	PREDICTED: 3-ketoacyl-CoA thiolase, mitochondrial [Apaloderma vittatum]	507245	825416	855367	354288	401144	680338	1.0691e+06	803282	1.07366e+06	803324	1.10364e+06	930042
676432943	hypothetical protein LOTGIDRAFT_171922 [Lottia gigantea]	1.75451e+06	1.47722e+06	1.80375e+06	1.75453e+06	2.1486e+06	1.90708e+06	2.89776e+06	3.83506e+06	2.42339e+06	3.10941e+06	1.73268e+06	3.27886e+06
524881653	PREDICTED: Niemann-Pick C1 protein-like [Aplysia californica]	16190.7	9789.5	6320.83	14490	15431.3	16929.1	24089.2	24409.5	29052	22344.2	8007.25	18159.9
678246239	synaptotagmin [Doryteuthis pealeii]	203699	318892	336500	148453	83569.1	250697	418141	187167	396930	310314	471175	352715
762103524	PREDICTED: 1,4-alpha-glucan-branching enzyme-like [Crassostrea gigas]	46800.3	47633.3	117095	39034.2	43680.8	60682.1	111059	62608.6	97429.1	68846.3	122527	102495
871244980	PREDICTED: tricarboxylate transport protein, mitochondrial-like [Aplysia californica]	54601.5	45852.4	85046.8	48789.6	65638.3	104188	103898	101126	124799	84365.4	109455	119592
405960251	Deoxyribodipyrimidine photo-lyase [Crassostrea gigas]	30902.7	104478	56157	65681.9	30253.6	67794.6	80529.1	102142	94961.4	115541	85287.9	86744.8
524875173	PREDICTED: alpha-aminoadipic semialdehyde dehydrogenase-like [Aplysia californica]	587346	738279	1.00727e+06	245909	243638	610241	1.03795e+06	580298	957037	628259	1.38233e+06	857949
443691588	hypothetical protein CAPTEDRAFT_228449 [Capitella teleta]	21977.1	56641.9	67184	21290.7	28238.1	46407.4	71087.7	36590.3	68807.5	55981.9	81404.8	68712.2
212168866	S1 type peptidase [Octopus kaurna]	173142	487948	519125	169949	208889	395691	508223	633806	405101	449455	652423	440528
405962695	C3 and PZP-like alpha-2-macroglobulin domain-containing protein 8 [Crassostrea gigas]	22665.1	4244.19	13043.6	19158	12169	21495.5	21269.9	14806	27893	23462	26041.3	33088.4
676441253	hypothetical protein LOTGIDRAFT_201069 [Lottia gigantea]	73132.8	79156.5	97937.4	44991.3	40705.8	80533.5	128316	69188.5	111063	90144.2	161493	96443
675304856	UNVERIFIED: hypothetical protein, partial [Mytilus trossulus]	1.4613e+06	2.47184e+06	2.91344e+06	1.10524e+06	1.0888e+06	2.285e+06	3.41255e+06	1.88082e+06	3.22068e+06	2.35285e+06	3.98091e+06	3.00969e+06
765826452	uncharacterized protein LOC105344505 precursor [Crassostrea gigas]	38267.4	164063	158096	72587.8	62399.1	103849	180247	131972	166032	131579	201760	132572
762102407	PREDICTED: integrin alpha-6-like isoform X1 [Crassostrea gigas]	26880.8	37388.7	48797.7	32327.7	38440.3	47643.5	72678.4	47179.1	68190.1	62815.7	42253.3	70860
762070002	PREDICTED: NADPH--cytochrome P450 reductase-like [Crassostrea gigas]	76688.2	112053	107714	39184.4	57142.4	117009	144699	91764.9	144433	133571	154842	132040
676430885	hypothetical protein LOTGIDRAFT_137613 [Lottia gigantea]	18825.7	37110.9	60022.6	28230.6	23682.3	38272.1	71317.2	22902.2	53595.5	52510.7	54377.2	69277.6
443729789	hypothetical protein CAPTEDRAFT_226883 [Capitella teleta]	73035.7	87005.9	105265	26093.3	62593.3	87917.6	135605	66894	105956	133005	138209	114698
524906293	PREDICTED: bifunctional purine biosynthesis protein PURH-like isoform X2 [Aplysia californica]	81877.5	190614	181715	56570.2	40078.5	85004.5	240725	74090.4	225595	109336	251097	95988.5
676472271	hypothetical protein LOTGIDRAFT_218432 [Lottia gigantea]	28888.4	40091.4	46403.9	15459.6	10673.6	37871.8	46884.6	38760.5	46127.8	37162.9	56085.5	56096.3
762080935	PREDICTED: alpha-aminoadipic semialdehyde synthase, mitochondrial-like isoform X1 [Crassostrea gigas]	393952	505053	598195	261650	257274	494979	733222	418443	710701	496516	902017	665628
676438774	hypothetical protein LOTGIDRAFT_157797 [Lottia gigantea]	280055	427518	450934	184153	209563	364741	558054	401498	575759	403409	591909	462848
676445467	hypothetical protein LOTGIDRAFT_239025 [Lottia gigantea]	2678.82	9003.04	14268.4	3107.87	2291.46	2100.29	12141	4104.35	7250.97	3122.56	14609.3	11004.3
134141898	Na+/K+ ATPase alpha subunit [Doryteuthis opalescens]	2.70944e+06	3.09475e+06	3.96241e+06	1.25544e+06	1.21052e+06	2.87426e+06	4.76165e+06	1.38585e+06	4.30124e+06	2.86914e+06	6.23073e+06	3.99243e+06
762154283	PREDICTED: A disintegrin and metalloproteinase with thrombospondin motifs 14-like isoform X2 [Crassostrea gigas]	33063	29941.7	37087.6	18978.7	24085.9	36414.1	62419.8	45619.5	50484.5	20550.6	58106	42271.9
676438147	hypothetical protein LOTGIDRAFT_140254 [Lottia gigantea]	41623.5	64869.5	87621.7	39867.9	21689.7	48119.5	80550.7	49385.1	105687	55071.1	93676.9	87994.4
762087354	PREDICTED: large neutral amino acids transporter small subunit 2-like isoform X1 [Crassostrea gigas]	124744	234010	309253	60036.5	55361.2	144369	274593	71526.2	227716	196526	446931	224967
612344382	serpin [Amphioctopus fangsiao]	427650	460220	495938	294310	335459	568305	592695	654760	654707	566919	754771	786099
733387118	putative chitotriosidase [Euprymna scolopes]	352454	495424	568275	200907	196745	407378	814054	422665	533718	436732	721319	518879
871274630	PREDICTED: slit homolog 3 protein-like [Aplysia californica]	1593.1	10097	2762.36	5304.51	2941.65	6172.72	7643.95	1676.89	10985.5	13166.8	5508.06	5790.32
676439859	hypothetical protein LOTGIDRAFT_238595 [Lottia gigantea]	24221.1	21718.6	26194.9	36944.6	23454.1	5571.21	42219.5	31645.4	46436.2	27128.3	42312.9	23790.5
524878973	PREDICTED: malate dehydrogenase, mitochondrial isoform X2 [Aplysia californica]	2.05016e+06	2.7585e+06	3.46382e+06	1.26064e+06	1.42988e+06	2.72093e+06	3.67548e+06	2.48083e+06	3.97807e+06	2.75601e+06	4.58288e+06	3.684e+06
762124052	PREDICTED: dihydropyrimidinase-like isoform X4 [Crassostrea gigas]	19694.4	27729	27721.1	8919.76	5191.32	24907.7	31766.9	17998.3	35015.4	19006.6	47676.5	25034.7
524887592	PREDICTED: gelsolin-like protein 2 [Aplysia californica]	102647	111958	61287.3	176083	138530	179311	174538	180266	229550	242025	160348	202507
212168866	S1 type peptidase [Octopus kaurna]	28394.9	38618.9	30559	2825.49	40496.7	42930.1	39286.2	49425.1	38120.4	71373.1	36056.3	49653.4
676434764	hypothetical protein LOTGIDRAFT_185986 [Lottia gigantea]	325683	584572	597323	238470	237076	530965	737689	441003	679408	536702	847942	637106
524899188	PREDICTED: phosphoglucomutase-2-like [Aplysia californica]	116343	155158	163835	77627.4	53384.7	140319	231458	92839.9	196062	144320	235996	188961
676484289	hypothetical protein LOTGIDRAFT_235630 [Lottia gigantea]	58612.9	113171	143662	55140.7	65325.9	102284	162947	126668	125966	101448	171920	140503
23598401	hypothetical protein [Euprymna scolopes]	16020	9464.38	29091.9	87415.4	21507.5	28281.9	82220.3	68313	12352.4	117743	7966.61	6918.68
762114716	PREDICTED: von Willebrand factor A domain-containing protein 5A-like [Crassostrea gigas]	126750	88098	94926.9	97878.9	84201.1	125392	153674	112618	201041	88129.5	207471	187126
676438531	hypothetical protein LOTGIDRAFT_238523 [Lottia gigantea]	301936	376179	444267	263036	217542	413673	583142	351091	596153	471449	603546	496868
676432201	hypothetical protein LOTGIDRAFT_156984 [Lottia gigantea]	75266	129333	138869	67378.4	73221.1	108374	194044	66698.2	183539	107018	220488	138787
P48728	GCST_HUMAN Aminomethyltransferase, mitochondrial OS=Homo sapiens GN=AMT PE=1 SV=1	118336	199415	225286	49599.3	94478.9	186517	266765	142165	247815	192439	249207	243286
524903389	PREDICTED: glycogen synthase kinase-3 beta [Aplysia californica]	61787.4	96668.6	114463	36357.8	41967.1	94388.1	135707	75563.8	123445	93020.8	147362	109057
260821394	hypothetical protein BRAFLDRAFT_129513 [Branchiostoma floridae]	91563.4	129948	179050	48116.3	53792	116125	217342	60665.8	162255	116239	227724	165275
321477681	hypothetical protein DAPPUDRAFT_304712 [Daphnia pulex]	437533	456046	593636	174537	188563	609509	649627	563192	675792	632296	669490	579208
260831053	hypothetical protein BRAFLDRAFT_124275 [Branchiostoma floridae]	459744	602058	674866	415167	342296	357217	802398	511496	811538	597185	950140	696355
335907476	putative Na+/K+-ATPase alpha subunit [Bathypolypus bairdii]	1.26671e+06	1.44942e+06	1.7505e+06	615177	685958	1.34899e+06	2.24935e+06	809744	1.95742e+06	1.35948e+06	2.65409e+06	1.87381e+06
871274397	PREDICTED: titin-like [Aplysia californica]	119274	164488	204331	47524.1	42095.3	119455	214008	72650.4	181222	138369	264417	195955
524865670	PREDICTED: uncharacterized protein LOC101849508 [Aplysia californica]	1.13025e+06	1.27557e+06	1.59585e+06	587535	756925	1.36167e+06	1.71963e+06	1.33912e+06	1.83661e+06	1.47907e+06	2.0909e+06	1.79526e+06
762116719	PREDICTED: proteasome subunit beta type-5-like [Crassostrea gigas]	201401	268647	260079	175313	122237	192557	313589	199367	277518	310535	449128	315875
298108443	voltage-dependent anion channel 2-like protein [Haliotis diversicolor]	2.33779e+06	3.90069e+06	4.2822e+06	1.38319e+06	1.45743e+06	3.40743e+06	4.97014e+06	2.58155e+06	4.55795e+06	3.36072e+06	5.83585e+06	4.32877e+06
300518909	glyceraldehyde-3-phosphate dehydrogenase [Cancer borealis]	5.92276e+06	8.98454e+06	1.03267e+07	2.15208e+06	2.41715e+06	6.21133e+06	9.17941e+06	6.66096e+06	9.41335e+06	7.6729e+06	1.3391e+07	8.71804e+06
871243800	PREDICTED: aconitate hydratase, mitochondrial-like [Aplysia californica]	993682	1.20181e+06	1.48119e+06	597400	538528	1.08403e+06	1.72929e+06	879710	1.63647e+06	1.21834e+06	1.97536e+06	1.57116e+06
676442972	hypothetical protein LOTGIDRAFT_203658 [Lottia gigantea]	38318	88748.6	95805.6	41665.2	59407.9	84386.5	115993	96408.8	109365	78757.3	107036	116336
871256595	PREDICTED: rab GDP dissociation inhibitor alpha-like [Aplysia californica]	1.16643e+06	1.48975e+06	1.94261e+06	544650	600550	1.22776e+06	2.09369e+06	1.01205e+06	1.87769e+06	1.46882e+06	2.40656e+06	1.79174e+06
226693233	arginine kinase 2 [Neocaridina denticulata]	67296.9	31516.8	66808.7	99777.8	22964.7	106208	73329.2	43547.3	120606	288207	27581.3	49267.4
762137891	PREDICTED: manganese-transporting ATPase 13A1-like [Crassostrea gigas]	44822.3	45280.6	62629.9	7836.95	15762.7	27685.5	61877.7	29806.9	51110.9	50863.3	78939.3	38930.7
676453193	hypothetical protein LOTGIDRAFT_214715 [Lottia gigantea]	75619.6	85439.9	106427	56556	49426.8	92005.8	115900	65461.5	142252	103977	159457	123284
676463747	hypothetical protein LOTGIDRAFT_190512 [Lottia gigantea]	171315	209454	338357	86146.8	81287.4	147097	323144	127686	282495	196098	340328	306795
676493445	hypothetical protein LOTGIDRAFT_223003 [Lottia gigantea]	3203.87	10573	9013.7	1651.93	7766.95	7514.19	9409.11	8449.13	8929.67	15070	8532.24	10101.3
524888420	PREDICTED: dolichyl-diphosphooligosaccharide--protein glycosyltransferase subunit 2-like isoform X1 [Aplysia californica]	588243	758971	833955	363758	311266	656706	1.06025e+06	469954	974998	879169	1.07852e+06	885237
31980648	ATP synthase subunit beta, mitochondrial precursor [Mus musculus]	3.11712e+06	4.82411e+06	5.33779e+06	1.56974e+06	1.60775e+06	4.48794e+06	5.74821e+06	3.82159e+06	6.079e+06	4.48795e+06	6.52897e+06	5.21976e+06
762115527	PREDICTED: uncharacterized protein LOC105337532 [Crassostrea gigas]	1.17468e+06	1.67674e+06	2.18766e+06	577403	781185	1.55313e+06	2.42043e+06	1.21317e+06	2.10094e+06	1.70254e+06	2.69322e+06	1.97282e+06
357603303	hypothetical protein KGM_12509 [Danaus plexippus]	22196.2	40474.8	49221.4	22493.7	35324.6	41951	50863.9	62331.1	56437.1	54089.7	56105	42094.7
443702325	hypothetical protein CAPTEDRAFT_150998 [Capitella teleta]	39453.9	46863.6	42320.9	30925.2	14432.9	43015.1	34831.9	29940.3	70704.4	52819.5	87540.4	54142.6
675867822	hypothetical protein HELRODRAFT_94372 [Helobdella robusta]	4677.81	23539.8	35765.1	825.93	40015.3	468.02	23226.5	34114	28336.8	24753.7	22839.4	26614.6
762091153	PREDICTED: N-acetylated-alpha-linked acidic dipeptidase 2-like [Crassostrea gigas]	9688.88	16738.3	20387.8	5232.6	1571.64	5503.13	18521.6	6962.83	14643.7	9359.2	25895.2	14362.6
524880570	PREDICTED: PDZ and LIM domain protein 1-like [Aplysia californica]	161921	213484	230322	89568.7	81621.7	206242	226113	271242	265560	213938	316016	198760
676487331	hypothetical protein LOTGIDRAFT_221596 [Lottia gigantea]	59207.1	36775.7	42815.1	3288.53	18477.6	3355.89	53422.5	25192	34452.8	39118.9	52744.6	43678
676427155	hypothetical protein LOTGIDRAFT_237355 [Lottia gigantea]	260616	242978	323297	176876	153030	348201	359784	245553	481143	343791	408733	443486
260789593	hypothetical protein BRAFLDRAFT_287353 [Branchiostoma floridae]	83949.6	93357.6	145615	36805.7	34455.6	74973	161599	59653.1	101246	105990	154419	128128
4321938	acetylcholinesterase precursor [Doryteuthis opalescens]	30671.7	49757.7	52398	27834.5	31598.5	42186.5	73321.4	27267.4	59257.4	45590.9	90188.9	59414.1
74823006	OCDH_PECMA RecName: Full=Octopine dehydrogenase; Short=OcDH [Pecten maximus]	33384.8	29863.7	43207.4	21905.8	26823.9	34070	46885.7	40217.5	48700.4	42812.2	56898	51065.6
676460157	hypothetical protein LOTGIDRAFT_209446 [Lottia gigantea]	181209	249324	218328	124230	143120	212781	370251	292850	232517	320706	251010	240361
319059317	sepiapterin reductase [Ictalurus punctatus]	38280.8	90130.2	92717.9	40199.2	38177.2	89303.7	99122.8	108393	103159	96846.9	78952.7	101311
405975834	Isocitrate dehydrogenase [NADP], mitochondrial [Crassostrea gigas]	2.65552e+06	3.12103e+06	3.85588e+06	1.39034e+06	1.41921e+06	3.02254e+06	4.37255e+06	2.92323e+06	4.25738e+06	3.02854e+06	4.88549e+06	3.90726e+06
676459929	hypothetical protein LOTGIDRAFT_104485 [Lottia gigantea]	27237.5	41258	57306.6	6901.29	15467.2	32484.2	54187.8	20728.5	46564.4	41903.3	59716.9	49896.2
676447013	hypothetical protein LOTGIDRAFT_201812 [Lottia gigantea]	761873	895773	1.25572e+06	463768	549310	1.05965e+06	1.30849e+06	898950	1.4377e+06	1.05291e+06	1.53629e+06	1.29342e+06
675850676	hypothetical protein HELRODRAFT_96929 [Helobdella robusta]	42913.9	47303.5	40547.5	44869.3	37785.1	53976.3	97433.2	49354.3	55875.6	74556.9	64633.4	61127.3
762132200	PREDICTED: uncharacterized protein LOC105343571 [Crassostrea gigas]	229598	242393	191530	202356	177753	246857	415775	267441	380952	261864	290863	327825
675387228	Isocitrate dehydrogenase [NADP] cytoplasmic, partial [Stegodyphus mimosarum]	378175	426020	340998	206797	318754	490259	602007	338336	615658	472988	660212	566970
762086921	PREDICTED: phosphoenolpyruvate phosphomutase [Crassostrea gigas]	7612.27	8361	8013.99	7107.67	10860.6	3307.49	5673.54	11740.9	10527.5	7148.55	24368.3	8691.58
676488938	hypothetical protein LOTGIDRAFT_131935, partial [Lottia gigantea]	133230	84794.9	63622.4	54097.1	131701	142910	144914	121196	167583	77211.8	249936	157863
871275424	PREDICTED: 2-oxoglutarate dehydrogenase, mitochondrial-like [Aplysia californica]	216250	349135	562412	114979	139043	305849	503735	157062	473184	342805	651699	410203
390350281	PREDICTED: alpha-L-fucosidase [Strongylocentrotus purpuratus]	7862.5	8670.92	8319.9	8479.94	5472.15	13772.8	14937.7	5004.25	17683	9772.73	16176.6	15499.8
P33527	MRP1_HUMAN Multidrug resistance-associated protein 1 OS=Homo sapiens GN=ABCC1 PE=1 SV=3	2451.34	2650.85	3306.97	4560.58	5297.98	6564.08	5255.39	6145.51	6428.21	6764.93	5497.4	7244.93
556982123	PREDICTED: nucleolin-like isoform X1 [Latimeria chalumnae]	742.525	8499.5	27911.1	1290.18	42921.8	5231.42	7837.09	59934.8	14262.2	12018.2	19554	16559.2
762140057	PREDICTED: protein disulfide-isomerase A3-like [Crassostrea gigas]	1.66044e+06	1.91412e+06	2.15965e+06	934817	888324	1.7201e+06	2.56678e+06	1.64959e+06	2.56964e+06	1.92375e+06	2.92767e+06	2.3015e+06
617512320	PREDICTED: lysosomal protective protein [Poecilia formosa]	135891	145930	181466	92019.6	50106.3	140735	239684	151207	190838	165314	176647	196616
443698496	hypothetical protein CAPTEDRAFT_124853 [Capitella teleta]	589186	959854	1.14631e+06	196568	236986	762053	1.15451e+06	409648	1.04007e+06	695621	1.54373e+06	995108
871257417	PREDICTED: uncharacterized protein LOC101860683 [Aplysia californica]	116395	206827	160399	84677.1	127572	185155	180744	237966	242564	255091	228258	175876
676459486	hypothetical protein LOTGIDRAFT_104663, partial [Lottia gigantea]	159807	343058	392874	125906	143299	231350	354165	258521	359891	296149	488895	334815
762159333	PREDICTED: inositol monophosphatase 1-like [Crassostrea gigas]	91121.7	131717	183182	58622.5	85572.3	143918	193499	108346	209522	107864	226210	194474
676458562	hypothetical protein LOTGIDRAFT_215641 [Lottia gigantea]	14828.2	22746.5	27373.2	7063.06	8094.23	25159.4	28555	14258	32694.5	20657.7	37400.4	23982.1
676423410	hypothetical protein LOTGIDRAFT_103202 [Lottia gigantea]	105024	155413	212937	83186	65507	123626	218579	82353.1	205665	164950	254786	188902
646701588	Lissencephaly-1-like protein [Zootermopsis nevadensis]	141505	123338	174897	38151.4	30636.6	83207.7	178718	50239.6	164987	127891	212089	150240
50740506	PREDICTED: lactoylglutathione lyase [Gallus gallus]	54255.3	86345.8	126821	46328	62420.3	93625.7	131666	72803.3	109699	101562	166058	120002
148231601	NIF3 NGG1 interacting factor 3-like 1 [Xenopus laevis]	6167.69	12291.5	19903.9	4043.83	8831.41	13021.6	20819.9	1727.47	19825.6	19682.1	19448.8	14462.2
339245823	peptidyl-prolyl cis-trans isomerase B [Trichinella spiralis]	67544.7	52741.2	39509.7	35208.7	47046.5	37993.2	56639.7	79864.9	48852.6	82853.8	58507.2	90746.3
432962211	PREDICTED: 2-oxoisovalerate dehydrogenase subunit beta, mitochondrial [Oryzias latipes]	114952	310777	229750	158521	179779	287785	363483	253785	360266	277392	397878	257623
780696994	PREDICTED: uncharacterized protein LOC105457836 [Wasmannia auropunctata]	25373	32751.7	25880	26636.5	23267.8	42884.7	40705.5	49304.2	52389.7	43798.2	39639.8	37659.2
260813663	hypothetical protein BRAFLDRAFT_230606 [Branchiostoma floridae]	124505	177292	180057	113553	108335	210172	245712	156431	252868	226526	268877	210938
126697356	thioredoxin peroxidase 2 [Haliotis discus discus]	911152	1.10011e+06	1.12944e+06	739932	629649	802880	1.29718e+06	959922	1.07175e+06	1.47584e+06	1.91258e+06	1.19209e+06
762131487	PREDICTED: huntingtin-interacting protein 1-like isoform X2 [Crassostrea gigas]	12065.4	5644.91	20574.1	3240.53	13740.5	2851.53	17876.1	14750.5	6592.78	13998.5	17287	15935.8
762160932	PREDICTED: medium-chain specific acyl-CoA dehydrogenase, mitochondrial-like [Crassostrea gigas]	570406	853222	973890	330343	394193	674275	1.16537e+06	611810	962058	778590	1.14473e+06	980729
871209239	PREDICTED: carbonic anhydrase 1-like [Aplysia californica]	47563.6	67117	105819	38536	53922.9	89056.6	102096	83416.5	127972	64566.4	138430	81051.6
826416468	PREDICTED: asparagine--tRNA ligase, cytoplasmic [Monomorium pharaonis]	38154.3	57081.4	83433	21814.6	22029.3	58418.5	81615.7	49302.9	74543.1	61385.9	80222.5	70389.5
871229908	PREDICTED: disco-interacting protein 2-like isoform X2 [Aplysia californica]	23160.8	14798.2	31362.5	10649.8	2370.15	19110	30603.2	12472.4	26167.7	19239.8	35933.2	26189.3
762155386	PREDICTED: choline transporter-like protein 1 isoform X2 [Crassostrea gigas]	34219.2	39389.9	41002.1	19624.5	22555.3	41759	52027	50907.7	33653.4	44039.7	60265.8	53808.6
871237735	PREDICTED: staphylococcal nuclease domain-containing protein 1-like [Aplysia californica]	560485	682641	944435	276643	241664	550278	1.05836e+06	350100	841169	648175	1.10171e+06	827668
405964213	Sulfotransferase family cytosolic 1B member 1 [Crassostrea gigas]	122683	88039.4	101785	190728	102459	196215	178193	196718	198617	247624	176894	190550
762117652	PREDICTED: mitochondrial dicarboxylate carrier-like [Crassostrea gigas]	23430.8	40209.9	31431.3	26131.2	22334.3	36319.3	40537.5	38713.5	52415.7	45512.4	44614	44689.4
405945552	2,4-dienoyl-CoA reductase, mitochondrial [Crassostrea gigas]	59666.2	59944.1	86109.1	45058.7	20939	75213.3	93233.3	51596.6	88017.8	83108	103442	94162.7
676474167	hypothetical protein LOTGIDRAFT_209952 [Lottia gigantea]	19570.6	23946.9	34448.5	28813.1	25259.3	36013.7	39061.7	72713.4	23883.5	39921.3	40858.5	32090.5
762134943	PREDICTED: probable voltage-gated potassium channel subunit beta [Crassostrea gigas]	176934	238777	199826	159140	260679	262151	366017	244405	450856	220462	377410	259465
676492623	hypothetical protein LOTGIDRAFT_133634 [Lottia gigantea]	249196	244681	332937	83609.5	88031.9	220792	390346	122824	293450	217289	478362	300499
260798889	hypothetical protein BRAFLDRAFT_262219 [Branchiostoma floridae]	127601	149371	188354	81953.8	81721.7	126478	222584	101567	175887	182050	251761	182725
492370606	cathepsin L2 [Sinonovacula constricta]	83643.3	217491	149689	146282	147090	163537	245353	250623	214761	174824	219327	236240
443720988	hypothetical protein CAPTEDRAFT_175039 [Capitella teleta]	46705.1	36619.6	64911.9	23903.2	29433	22136.1	74323	26878.9	62301.6	45936.2	85023.6	35890.1
762164512	PREDICTED: NADH-cytochrome b5 reductase 3-like isoform X2 [Crassostrea gigas]	75418.8	88591.6	88897.5	57493.7	18449.5	68247.1	105184	57179.4	108555	88341.7	136971	90084.3
61197416	selenium-binding protein [Azumapecten farreri]	28259.9	48788	60617.4	22928.5	20434	44597	60583.2	30001	63184.4	44052.1	70643.6	64499.6
676459799	hypothetical protein LOTGIDRAFT_153262 [Lottia gigantea]	202760	102071	133676	87355.2	135199	106873	124632	209517	154777	324007	165421	154229
676484160	hypothetical protein LOTGIDRAFT_129991 [Lottia gigantea]	2084.54	1673.86	16500.7	1099.5	1738.65	7196.67	10794.2	9095.09	5123.55	8237.33	7449.55	3967.76
762108838	PREDICTED: ADP,ATP carrier protein-like [Crassostrea gigas]	7.14347e+06	9.23013e+06	1.1916e+07	5.45176e+06	4.22164e+06	8.42056e+06	1.31639e+07	7.21815e+06	1.21077e+07	9.20057e+06	1.57375e+07	1.09578e+07
432936067	PREDICTED: trifunctional enzyme subunit alpha, mitochondrial [Oryzias latipes]	337757	443247	487013	287423	242266	425910	636394	368615	656462	451995	672712	489815
460417317	uncharacterized oxidoreductase-like isoform 1 [Gallus gallus]	208969	225596	275696	141037	134413	254503	294739	268634	359843	250314	362487	289994
557756950	PREDICTED: phosphatidylinositol transfer protein beta isoform isoform X2 [Musca domestica]	117819	122890	171935	67672.5	76174.8	135855	194473	130112	199288	116731	220635	157686
676463747	hypothetical protein LOTGIDRAFT_190512 [Lottia gigantea]	23776.9	2762.1	38641.5	14925	12049.6	21297.6	32073.5	19776.8	30566.4	20034.2	35104.4	29377.9
831294925	PREDICTED: leukocyte elastase inhibitor-like [Clupea harengus]	18942.5	14272.8	25363.2	7898.64	4221.15	20364.2	16665.9	20127.7	28802.4	21306.8	22683.4	24359.4
871246464	PREDICTED: uncharacterized protein LOC101848762 [Aplysia californica]	102585	157780	155027	72900.8	93921.3	160465	180029	183830	198809	136145	228414	165047
762129323	PREDICTED: dolichyl-diphosphooligosaccharide--protein glycosyltransferase subunit 1-like isoform X1 [Crassostrea gigas]	63805.4	151732	165043	62684.8	38468.4	86941.7	173252	93895.4	106704	114393	199519	148527
871243716	PREDICTED: GDP-mannose 4,6 dehydratase-like [Aplysia californica]	81634.2	93508.6	102602	138305	107526	164350	171519	111557	183909	201910	150924	191588
762076524	PREDICTED: succinate dehydrogenase [ubiquinone] iron-sulfur subunit, mitochondrial-like [Crassostrea gigas]	233519	278325	112307	168205	165238	198417	273694	259241	264625	244913	441740	214940
440923393	17beta-HSD4 [Azumapecten farreri]	14848.6	28427	40293.4	5635.34	16434.8	6196.05	7250.88	21424.8	28757.5	35703.5	33826.2	37236.7
676463165	hypothetical protein LOTGIDRAFT_232925 [Lottia gigantea]	12004.9	14307.1	18651.1	9207.23	12939.9	3848.06	11701.1	15330.3	17772	15528.5	24810.8	19033.1
196002275	expressed hypothetical protein [Trichoplax adhaerens]	89348.9	142216	112198	64007.4	94234.6	109363	200110	137205	156341	88987.2	154349	159058
675888030	hypothetical protein HELRODRAFT_181472 [Helobdella robusta]	65627.8	84620.9	79776.8	47021.5	33294.2	69455.9	98345.8	88865.5	100649	85070	99512.5	83915.8
291232636	PREDICTED: 3-hydroxyisobutyryl-CoA hydrolase, mitochondrial-like [Saccoglossus kowalevskii]	82373.3	89198	111276	79014.6	80652.7	136152	167335	117822	182780	84507.3	202658	92216.9
126327140	PREDICTED: interstitial collagenase [Monodelphis domestica]	15991.4	19595.2	18023.5	12424.7	20541	10334.4	13435.3	16742.9	34790.9	34898.5	35501.1	6516.68
443698586	hypothetical protein CAPTEDRAFT_128252 [Capitella teleta]	344148	453207	263299	198300	239956	254011	522239	417322	468334	314013	468671	374856
524886566	PREDICTED: thiosulfate sulfurtransferase-like isoform X1 [Aplysia californica]	4765.27	26255.7	8883.9	22260.3	16146.4	18398.8	30149.2	16329.6	25852.7	17268.3	29894.4	22011.3
524902450	PREDICTED: very-long-chain enoyl-CoA reductase-like [Aplysia californica]	38724	31295.9	30999.7	8009.62	6135.08	29708.7	39486.9	22172.3	39232.7	43270.8	35824.5	31950.1
410935705	thioester-containing protein 1 [Euprymna scolopes]	157788	219263	331744	42230.3	54199.3	212207	287767	140546	235317	154908	407987	261844
676496582	hypothetical protein LOTGIDRAFT_237171 [Lottia gigantea]	52148.3	212441	258573	109578	107777	177561	239578	181848	215133	210939	261694	233747
676472951	hypothetical protein LOTGIDRAFT_192810 [Lottia gigantea]	1.42212e+06	1.70639e+06	1.77502e+06	610151	616899	1.19205e+06	1.85277e+06	1.05076e+06	1.6834e+06	1.6004e+06	2.6203e+06	1.89937e+06
524895425	PREDICTED: copine-3-like [Aplysia californica]	1200.31	6185.37	26522.9	5011.27	13134.7	17296.3	24657.3	12429.9	22470.7	5114.07	26921.1	9735.66
676439202	hypothetical protein LOTGIDRAFT_177987 [Lottia gigantea]	131190	189191	186859	46613.2	80980.9	131045	203652	142914	197319	152663	232634	188992
762122623	PREDICTED: peptidyl-prolyl cis-trans isomerase-like [Crassostrea gigas]	186792	239888	224472	126109	203378	236930	253030	287809	381784	221169	329197	304449
524881651	PREDICTED: NADH dehydrogenase [ubiquinone] flavoprotein 1, mitochondrial-like [Aplysia californica]	122625	163231	213732	109949	113909	178918	238115	151645	239662	172880	297496	216130
Q78P75	DYL2_RAT Dynein light chain 2, cytoplasmic OS=Rattus norvegicus GN=Dynll2 PE=1 SV=1	40448	75717.6	70257.2	88325.1	68192.6	59031.7	105250	137097	76168.9	102913	70299.9	94325.9
676424175	hypothetical protein LOTGIDRAFT_208637 [Lottia gigantea]	117614	166248	209090	73548.6	51875.3	159513	222986	103556	212323	152269	246549	194675
762094991	PREDICTED: putative aminopeptidase W07G4.4 [Crassostrea gigas]	441655	558313	604831	234022	370860	441291	788598	379446	670167	489356	821305	708701
260800011	hypothetical protein BRAFLDRAFT_209115 [Branchiostoma floridae]	199490	271300	220842	149556	155479	190561	244561	307044	309776	259236	326523	278390
762146952	PREDICTED: adenine phosphoribosyltransferase-like [Crassostrea gigas]	113794	135093	134623	85159.6	91002.4	144191	178364	154719	166879	171129	166385	185353
524889526	PREDICTED: mitochondrial-processing peptidase subunit beta [Aplysia californica]	679887	1.05028e+06	1.14993e+06	535654	539502	892736	1.36902e+06	719653	1.27459e+06	1.03818e+06	1.49194e+06	1.14988e+06
573894905	PREDICTED: L-xylulose reductase-like [Lepisosteus oculatus]	22796.5	30245.1	42747.8	20370.5	20114.5	29738.8	34382.9	28122.9	49776.6	37979	48106.5	42775
676486513	hypothetical protein LOTGIDRAFT_221335 [Lottia gigantea]	256208	338830	382445	168269	165211	273809	452633	207755	407270	306267	538697	388123
283837552	serine protease 2 [Heterololigo bleekeri]	116193	116312	147281	74797.1	112573	126117	164848	159371	122018	203164	131770	224926
762144203	PREDICTED: delta-1-pyrroline-5-carboxylate dehydrogenase, mitochondrial-like [Crassostrea gigas]	47693.2	48831	48884.3	27453.1	24671.1	38905.6	58509.7	41425.4	57642.1	49766.6	77352.8	58061.1
524912853	PREDICTED: mannose-6-phosphate isomerase-like isoform X1 [Aplysia californica]	364810	392588	434472	331844	293569	425505	579788	367599	594272	469989	681553	556143
762094275	PREDICTED: ribose-phosphate pyrophosphokinase 1 isoform X2 [Crassostrea gigas]	238303	265297	333459	155446	314757	379205	518016	228960	480371	234152	491164	486719
762161175	PREDICTED: oxygen-dependent coproporphyrinogen-III oxidase-like [Crassostrea gigas]	28401.5	36383	46899.4	13162.3	10644.7	34512.1	55733.9	19593.8	49569	26073	55500.7	39382.4
573897770	PREDICTED: titin-like [Lepisosteus oculatus]	59945.2	68485	100197	17084.3	22504.6	50657.9	92414.2	26011.7	81134.6	61548.1	116845	82955.6
675379236	Glycogen phosphorylase, partial [Stegodyphus mimosarum]	251816	319753	475485	98005.7	85669.1	243465	422414	114579	368004	282060	584957	358250
762145751	PREDICTED: puromycin-sensitive aminopeptidase-like [Crassostrea gigas]	1.40467e+06	1.76412e+06	2.2807e+06	637222	490308	1.37823e+06	2.27864e+06	733461	2.03287e+06	1.52349e+06	2.98292e+06	1.94054e+06
780187690	PREDICTED: hemicentin-1 [Strongylocentrotus purpuratus]	1.28597e+06	1.65523e+06	1.97243e+06	464585	570457	1.59747e+06	2.01862e+06	1.05561e+06	1.96911e+06	1.40515e+06	2.57901e+06	1.86999e+06
524916601	PREDICTED: uncharacterized protein LOC101849429 [Aplysia californica]	629811	798585	1.02987e+06	405205	371116	770906	1.05277e+06	495242	1.1342e+06	845087	1.20598e+06	1.05008e+06
642918534	PREDICTED: titin [Tribolium castaneum]	18246.4	25486.6	44137.8	1465.46	2495.71	24412.6	31567.4	5420.79	34528.8	25368.6	48095.5	22847.7
P50516	VATA_MOUSE V-type proton ATPase catalytic subunit A OS=Mus musculus GN=Atp6v1a PE=1 SV=2	211986	285500	322446	148539	151132	301948	383314	258111	377290	295527	375215	361641
762158801	PREDICTED: probable aminopeptidase NPEPL1 [Crassostrea gigas]	237201	272121	311212	93959.8	97811	210776	340461	149814	322525	187653	445687	318359
762125786	PREDICTED: guanine nucleotide-binding protein subunit beta-2-like 1 [Crassostrea gigas]	951959	1.66191e+06	1.96667e+06	465564	480849	1.11884e+06	1.99807e+06	876091	1.61152e+06	1.25609e+06	2.21037e+06	1.61708e+06
524895893	PREDICTED: delta-1-pyrroline-5-carboxylate dehydrogenase, mitochondrial-like isoform X1 [Aplysia californica]	303799	358694	363516	181581	182685	297205	389051	295203	412441	371315	524625	436013
328777746	PREDICTED: roughened isoform X3 [Apis mellifera]	508700	589989	723000	306462	282808	591842	775230	484254	776464	603265	968590	713736
762084349	PREDICTED: pyruvate carboxylase, mitochondrial-like isoform X4 [Crassostrea gigas]	295777	341132	426757	140843	162083	290495	412920	233017	431694	339175	555518	411623
524884444	PREDICTED: proteasome subunit beta type-3-like [Aplysia californica]	56854.3	75301.1	85383.9	43608.1	40703.7	83206.5	99775.4	69228.1	105186	67571.8	120025	92143.4
762125586	PREDICTED: glycogen [starch] synthase-like isoform X1 [Crassostrea gigas]	81529.8	142333	169944	62963.3	44874.7	126540	173881	55579.4	146761	118131	215517	192803
524876852	PREDICTED: ubiquitin carboxyl-terminal hydrolase 7-like isoform X1 [Aplysia californica]	54075.5	71588.1	106673	9168.68	18061.9	56751.6	94891	21501.8	74438.8	69387	106452	87683.2
762078856	PREDICTED: trans-2-enoyl-CoA reductase, mitochondrial-like [Crassostrea gigas]	86685.3	119688	111400	59642.5	59848.8	101022	128272	116303	134587	135700	137222	120792
762168522	PREDICTED: hypoxia up-regulated protein 1-like isoform X1 [Crassostrea gigas]	416425	553203	563611	389669	404093	606758	650779	547530	800603	693235	880388	637577
P48375	FKB12_DROME 12 kDa FK506-binding protein OS=Drosophila melanogaster GN=FK506-bp2 PE=3 SV=2	74903.5	89668.3	87425.8	19502.5	67289.8	59702.9	97282.9	86089.8	101367	75494.8	118908	92140.4
676437147	hypothetical protein LOTGIDRAFT_139785 [Lottia gigantea]	123923	119444	142244	68368	105465	134372	191112	120681	195950	129896	209493	147415
675858960	hypothetical protein HELRODRAFT_98836 [Helobdella robusta]	338554	487722	534111	136436	183436	413914	564882	332329	510845	417394	657641	518283
817199888	PREDICTED: 40S ribosomal protein S11 [Orussus abietinus]	102167	166772	220034	20387.6	43241	119672	187078	59676.3	175807	174511	190518	175842
676436355	hypothetical protein LOTGIDRAFT_212757 [Lottia gigantea]	226622	181450	188417	209946	121056	263225	285789	289286	319278	227167	337870	246448
332375360	unknown [Dendroctonus ponderosae]	34830.1	68382.3	86280.1	28142.3	22117.1	51883.4	67985.5	54331.5	76560.3	83922.5	67689.9	67305.1
762126697	PREDICTED: BRO1 domain-containing protein BROX-like [Crassostrea gigas]	13276.8	12551.3	11311	21515.6	10063.9	5129.86	16742.7	17208.5	15809.1	10311.4	22439.2	23173.4
P54886	P5CS_HUMAN Delta-1-pyrroline-5-carboxylate synthase OS=Homo sapiens GN=ALDH18A1 PE=1 SV=2	99982.1	136346	149512	96065.5	99514.9	115640	218799	191305	143405	157191	131320	155374
762103275	PREDICTED: dolichyl-diphosphooligosaccharide--protein glycosyltransferase subunit STT3A [Crassostrea gigas]	129148	122978	164949	61131.7	18000.4	111821	191388	39080.1	166197	139410	201275	132265
347966858	AGAP001951-PA [Anopheles gambiae str. PEST]	360463	539942	678326	266506	264881	443708	761263	421238	662797	436076	827731	541181
676452769	hypothetical protein LOTGIDRAFT_116228 [Lottia gigantea]	234245	324492	417696	170844	155581	291249	419344	249154	398158	323046	500132	384614
556991310	PREDICTED: transmembrane protein 14C-like [Latimeria chalumnae]	15959.3	11597.1	26643.6	7617.39	10403.8	20370.7	23938.3	13281.2	24410.4	14661	27783.3	27896.7
524886658	PREDICTED: uncharacterized protein LOC101856578 [Aplysia californica]	200856	307969	352543	179272	158674	229506	320388	213681	321106	322942	351085	507203
405975735	Collagen alpha-5(VI) chain [Crassostrea gigas]	14681	21848.6	15213.5	14466.8	13372.4	20402.3	43082.8	9111.65	29667.1	9604.58	28456.8	22489.2
296317355	40S ribosomal protein S24 [Saccoglossus kowalevskii]	100987	134213	203208	92698.6	81886	134400	172313	151545	200124	181089	194096	165191
762114124	PREDICTED: dehydrogenase/reductase SDR family member 4-like [Crassostrea gigas]	43928.2	50976.8	27738.8	24096.2	11245.7	31165.5	36216.5	43787.8	53134.9	35600.7	71946	28581.5
676478160	hypothetical protein LOTGIDRAFT_193895 [Lottia gigantea]	49187.4	65743.9	60249.4	26443.1	12447.7	53436.6	71412	63140.8	56449.6	60212.4	57422.9	72116.9
755978870	PREDICTED: uncharacterized protein LOC105269855 [Fopius arisanus]	36931.5	29059.7	17991	78097	83520	68418.3	64317.6	85298	85716.3	83164.1	45768.1	82586.1
676462942	hypothetical protein LOTGIDRAFT_190244 [Lottia gigantea]	105927	100103	132813	92262.8	57018.1	76495.1	159285	61680	152221	89642.4	211607	128679
762156193	PREDICTED: serine/arginine-rich splicing factor 6-like isoform X2 [Crassostrea gigas]	3942.35	30768.8	21859.4	8896.44	8745.73	14185.5	22928.6	22106.8	21732.3	20629.6	27234.1	11082.4
734606407	PREDICTED: CD63 antigen [Larimichthys crocea]	406313	156249	146824	351800	372440	282259	297468	420205	538943	474901	267467	440948
242021403	ornithine aminotransferase, putative [Pediculus humanus corporis]	279847	305223	357378	245754	231048	275569	422708	299053	377273	409586	439419	460458
676485090	hypothetical protein LOTGIDRAFT_167800 [Lottia gigantea]	60205.9	85975.5	90994.7	47962.4	41059.4	37523.1	111421	13953.2	100242	63544.7	117721	109755
5777609	nicotinic acetylcholine receptor subunit alpha6 [Mus musculus]	54010.7	83869.9	88337.7	28766.9	29110.4	84225.7	91231.8	82131.7	86820.1	72294.9	115077	75535.4
676446573	hypothetical protein LOTGIDRAFT_114341 [Lottia gigantea]	87927.2	99459.9	122455	78858.9	52005	95977.2	129530	109726	134205	118284	152090	118278
762098613	PREDICTED: NADH dehydrogenase [ubiquinone] iron-sulfur protein 6, mitochondrial-like [Crassostrea gigas]	64827.4	158670	158139	85021.2	73348.2	135777	144795	168701	160395	158040	176920	150532
543339070	PREDICTED: dehydrogenase/reductase SDR family member 12 [Pseudopodoces humilis]	158359	462103	563651	261855	291531	462825	511522	438075	519955	434687	656684	562388
762128244	PREDICTED: cysteine-rich venom protein latisemin-like [Crassostrea gigas]	34968.5	12614.2	20145.2	11528.9	19283.7	17311.3	12073.5	30016.7	38896.4	17046.2	28611.5	37636.7
524881606	PREDICTED: uncharacterized oxidoreductase At1g06690, chloroplastic-like [Aplysia californica]	186580	241789	303432	236262	214353	316155	382054	274570	375598	382315	331751	376468
688531524	PREDICTED: uncharacterized protein si:ch73-132f6.5 [Danio rerio]	48753.9	45646	62323.2	13145.6	63182.8	54781.5	72694.9	68252.3	75428.5	55844.3	68187	67272.5
524907808	PREDICTED: FAD-dependent oxidoreductase domain-containing protein 1-like [Aplysia californica]	28741	44412.4	45115.9	13950.4	12907.9	32842.7	43732.5	22027.9	48744.5	38728.4	57098.1	41688.9
524881799	PREDICTED: 60S ribosomal protein L31 [Aplysia californica]	32427.5	223898	220450	139131	152056	154118	236078	213689	229928	225494	218650	181380
Q01241	NF70_DORPE 70 kDa neurofilament protein OS=Doryteuthis pealeii PE=2 SV=1	570872	826997	750743	510954	486822	885367	762812	974426	1.19497e+06	859885	1.05858e+06	843938
524868121	PREDICTED: uncharacterized protein C167.05-like [Aplysia californica]	47745.7	66562.3	71866.5	42533.3	56446.5	89852.2	67055.6	93000.2	98224.2	79297.3	89532	102550
159741	omega-crystallin [Enteroctopus dofleini]	1.16075e+06	380747	441106	1.1218e+06	1.36553e+06	1.75312e+06	1.10498e+06	1.1392e+06	1.40605e+06	1.75921e+06	1.16001e+06	2.21888e+06
871217015	PREDICTED: mitochondrial glutamate carrier 1-like [Aplysia californica]	22731.6	47595.2	44771.7	51451.9	46153.1	51679.4	66736.9	51904.3	66502.6	57475.9	78186.1	52529
291224559	PREDICTED: methylmalonic aciduria and homocystinuria type C protein homolog [Saccoglossus kowalevskii]	22110.7	12420	12678	19827.8	14658.2	23765.6	20826.2	3901.14	24798.3	44579.9	20592.9	34135.3
443689881	hypothetical protein CAPTEDRAFT_182891 [Capitella teleta]	68189	73834	81901.9	76643.8	49411.8	76567.8	145455	47537.6	107665	88621.4	116085	96613.5
46195771	alcohol dehydrogenase class-3 [Danio rerio]	442746	558395	727833	176300	178984	476054	705569	264031	668530	422165	942520	608661
676485111	hypothetical protein LOTGIDRAFT_221280 [Lottia gigantea]	58330.4	59047.5	85291.7	33921.3	20100.4	36399.9	84066.6	30750.5	76777.4	59099.9	92672.8	70034.5
674068409	PREDICTED: tRNA (uracil-5-)-methyltransferase homolog A isoform X1 [Nannospalax galili]	5146.24	8131.74	15004.3	3101.66	8440.71	5585.91	11990.8	1285.78	2147.73	13067.8	16014.5	19521.3
266616	NF60_DORPE RecName: Full=60 kDa neurofilament protein; Short=NF60 [Doryteuthis pealeii]	115576	108364	103422	136050	104291	201039	128125	191169	214247	189591	179016	180977
820947133	Eka-protein kinase A protein [Euperipatoides kanangrensis]	186165	231609	227823	109557	101188	182302	259838	177645	246785	262517	280895	233851
762104009	PREDICTED: prostaglandin reductase 1-like [Crassostrea gigas]	233258	268089	365596	155803	78834	230529	367060	179886	334250	309451	371651	311657
762102346	PREDICTED: endoplasmic reticulum-Golgi intermediate compartment protein 1-like [Crassostrea gigas]	8895.37	8592.5	6840.24	21766.3	4328.26	20332.4	15263.6	2331.44	23395.2	19228.9	15668.8	23604.3
871221164	PREDICTED: fermitin family homolog 2-like [Aplysia californica]	64741.9	118476	93724.3	57360.9	100340	128645	163326	102020	133265	138565	148443	106322
676425954	hypothetical protein LOTGIDRAFT_205986 [Lottia gigantea]	82234.1	103780	136248	61538.6	98683.7	106818	154388	79239.5	198835	85441.5	176785	132977
762163372	PREDICTED: protein disulfide-isomerase A5-like [Crassostrea gigas]	116417	145734	190958	62110.5	71689.9	117053	214780	66019.3	158938	138525	225683	184673
Q791V5	MTCH2_MOUSE Mitochondrial carrier homolog 2 OS=Mus musculus GN=Mtch2 PE=1 SV=1	225924	253817	296602	165179	192398	311680	357820	307934	352843	271621	409941	328862
260836799	hypothetical protein BRAFLDRAFT_68401 [Branchiostoma floridae]	181623	149807	121020	169098	127983	146905	181652	137866	239316	286346	210731	200287
676478708	hypothetical protein LOTGIDRAFT_219806 [Lottia gigantea]	417934	444747	410439	355870	293192	514644	600209	483275	590367	539968	632120	568567
676444868	hypothetical protein LOTGIDRAFT_187185 [Lottia gigantea]	76649.8	135139	117751	34483.4	30843.4	73682.8	143162	66006.5	120695	81252.3	122370	122642
405971352	Disks large-like protein 1 [Crassostrea gigas]	31288.5	106964	114434	71434.7	77629.3	100233	121683	103837	120919	114346	130398	111713
23598405	ganglioside GM2 activator precursor [Euprymna scolopes]	34398.7	31980.6	35077.2	21752.4	29324.2	33761.8	46755.5	60455.8	45507.4	28564.8	48899.8	30672.4
676465841	hypothetical protein LOTGIDRAFT_204097 [Lottia gigantea]	56913.5	56148.3	87090	49118.9	43149.9	62996.6	103119	46615.3	93093.5	68170.3	94912.3	91701.7
676478154	hypothetical protein LOTGIDRAFT_206956 [Lottia gigantea]	337863	484448	591431	206404	194047	384810	618173	284272	512173	430793	736837	495728
762091978	PREDICTED: insulin-degrading enzyme-like [Crassostrea gigas]	197394	255543	326180	140698	166479	261425	391490	168350	348628	212486	408633	356593
260816652	hypothetical protein BRAFLDRAFT_281736 [Branchiostoma floridae]	410941	498548	730456	192113	167693	490047	678279	271320	609953	465668	814104	644864
676476812	hypothetical protein LOTGIDRAFT_219285 [Lottia gigantea]	271866	500753	586531	242273	273571	379218	618601	352060	538744	421494	669464	552330
52550954	hemocyanin A-type [Enteroctopus dofleini]	115026	263301	344587	46808.5	65669.5	168471	302120	79013.1	201099	178315	398514	244067
762149465	PREDICTED: peritrophin-44-like [Crassostrea gigas]	111646	308830	97069.1	273554	600417	135880	272335	468006	310219	383358	253445	446737
573890975	PREDICTED: branched-chain-amino-acid aminotransferase, cytosolic-like [Lepisosteus oculatus]	148544	220147	223012	153836	148691	273321	296916	193363	294569	267210	309045	268434
676447145	hypothetical protein LOTGIDRAFT_201834 [Lottia gigantea]	1.31678e+06	3.55545e+06	5.0211e+06	667091	822214	2.04518e+06	3.40869e+06	1.13851e+06	3.07205e+06	2.75999e+06	4.30935e+06	4.0429e+06
501292430	cdc42 homolog precursor [Riptortus pedestris]	385791	467025	623646	220099	238446	510817	622612	347322	617643	470092	781219	569698
762160944	PREDICTED: malignant fibrous histiocytoma-amplified sequence 1 homolog [Crassostrea gigas]	7468.37	13513.7	36829.7	20603.2	8035.48	19403.3	35954.1	12558.3	21378.9	32142.1	23678.1	21786
762113070	PREDICTED: cystathionine beta-synthase-like isoform X6 [Crassostrea gigas]	138919	139138	182668	102975	153364	225916	240321	193904	229776	220425	210319	219000
676442912	hypothetical protein LOTGIDRAFT_158548 [Lottia gigantea]	31325.4	40555.4	53194.5	19028.8	28525.5	51484	59811.6	53326.9	39382.4	44155.2	66034.6	49419.6
871260491	PREDICTED: NADH-ubiquinone oxidoreductase 20 kDa subunit-like [Aplysia californica]	55776.2	74056.7	95364.1	62434.4	20620.4	97789.8	103103	60286.8	110435	79104.1	124220	88155.8
871248251	PREDICTED: uncharacterized protein LOC101845410 [Aplysia californica]	104243	131771	149953	75538.7	46639.6	120801	180816	73178.1	154823	109477	188495	167189
676492112	hypothetical protein LOTGIDRAFT_236570 [Lottia gigantea]	30762.8	28567.4	33969.7	15208.1	16305.6	30839	44992	21177.5	40008.8	31466.4	45740.7	32726.4
871269217	PREDICTED: ganglioside GM2 activator-like [Aplysia californica]	1.45304e+06	1.28354e+06	1.49602e+06	1.27825e+06	1.63635e+06	2.2364e+06	2.34571e+06	2.73357e+06	2.41533e+06	1.58594e+06	1.69624e+06	2.24575e+06
676444949	hypothetical protein LOTGIDRAFT_158944 [Lottia gigantea]	75091.8	77920	77328.4	30862.1	45395.7	83554.1	86650.4	84957.6	102861	65152	111542	90169.7
675378192	Iron/zinc purple acid phosphatase-like protein, partial [Stegodyphus mimosarum]	75015.1	284053	94477.9	73110.8	71577.4	94318.7	111134	133032	262623	83328.9	121134	249340
871275871	PREDICTED: dihydrolipoyllysine-residue succinyltransferase component of 2-oxoglutarate dehydrogenase complex, mitochondrial-like [Aplysia californica]	380793	583178	587065	310923	289322	541536	710695	446089	623976	565840	801389	585068
212168769	CAP protein [Hapalochlaena maculosa]	385523	607029	572631	481779	718660	581987	951231	1.10935e+06	588625	678761	598959	710465
220683564	sodium-calcium exchanger [Doryteuthis pealeii]	1.41586e+06	1.1603e+06	1.30239e+06	1.0387e+06	691897	997630	2.00807e+06	1.47057e+06	1.38843e+06	1.23288e+06	1.6855e+06	1.36503e+06
443687678	hypothetical protein CAPTEDRAFT_152844 [Capitella teleta]	22036.6	29994.2	44123.3	17130.2	18402.6	29504	43283.6	23300.1	39450.6	36581.4	43847.4	36668
405954068	Pyruvate kinase isozymes M1/M2 [Crassostrea gigas]	418523	661158	843899	153943	165185	440365	759590	242705	622236	467630	963957	653828
676437094	hypothetical protein LOTGIDRAFT_111948 [Lottia gigantea]	237361	269047	386822	130507	107103	276005	372287	147261	340433	296685	461216	327192
406679476	mitochondrial ATP synthase subunit beta, partial [Eucrassatella cumingii]	2.49284e+06	3.55416e+06	3.86982e+06	1.34607e+06	1.3878e+06	3.56755e+06	4.00808e+06	2.93249e+06	4.11221e+06	3.09295e+06	4.348e+06	3.91329e+06
762158453	PREDICTED: ragulator complex protein LAMTOR1-like [Crassostrea gigas]	18356.6	4262.52	15987.9	20995.7	20542.4	15997.4	23063.6	4194.73	28765.2	31811.1	24724.6	20267.6
676424013	hypothetical protein LOTGIDRAFT_205585 [Lottia gigantea]	106899	141728	134917	67761	85808.8	112585	178263	113470	157094	120918	173229	153153
676420120	hypothetical protein LOTGIDRAFT_151884 [Lottia gigantea]	27669.5	33087.1	48153.3	15778.5	4486.56	40918.1	42094.5	17922.7	44975.3	37123.6	54720.2	37722.4
676491085	hypothetical protein LOTGIDRAFT_222342 [Lottia gigantea]	61297.4	67957.7	93609.7	31593.2	36752.6	62216.3	91326.3	45590.5	85238.5	80520.9	96959	87511.2
524900386	PREDICTED: eukaryotic peptide chain release factor subunit 1 [Aplysia californica]	406031	383237	476795	231237	205657	385777	540336	366256	534836	428544	525544	481335
871241817	PREDICTED: protein phosphatase 1 regulatory subunit 7-like [Aplysia californica]	12351.1	23412.4	21356.5	6827.95	20888.8	23290.4	22030.8	22946.4	24138.4	24851.1	22746.9	32194.9
676456801	hypothetical protein LOTGIDRAFT_144857 [Lottia gigantea]	4531.21	3235.41	7253.5	2030.86	2890.38	5358.69	7100.84	5825.25	1169.94	5790.61	7173.81	7746.19
410935705	thioester-containing protein 1 [Euprymna scolopes]	7.57658e+06	1.12613e+07	1.27346e+07	1.76246e+06	2.88627e+06	7.1426e+06	1.12057e+07	5.88875e+06	9.17127e+06	7.85759e+06	1.50735e+07	1.03702e+07
762100373	PREDICTED: hydroxyacylglutathione hydrolase, mitochondrial-like [Crassostrea gigas]	61767.3	65606.4	68792.7	22449.4	31649.8	63368.5	84534.5	44811.8	77341.4	63893	84962.5	75274
780172842	PREDICTED: LOW QUALITY PROTEIN: deleted in malignant brain tumors 1 protein [Strongylocentrotus purpuratus]	1667.3	32422.4	5458.59	16581	21685.2	6731.82	2085.76	20770.6	24594	15001.1	34480.4	19183.9
597747154	PREDICTED: S-formylglutathione hydrolase isoform X2 [Astyanax mexicanus]	408100	466496	628221	307919	302791	502587	670535	421622	663388	483753	748554	599907
676446406	hypothetical protein LOTGIDRAFT_231429 [Lottia gigantea]	3951.49	6935.8	11557.2	6472.55	14039.7	5046.33	15380.4	4282.63	14949	10833.7	17252.1	3130.34
348586986	PREDICTED: S-methyl-5'-thioadenosine phosphorylase [Cavia porcellus]	91515.5	186308	183863	84572.9	74085.3	99229.1	168006	136099	190971	127769	186126	177237
126697414	putative mitochondrial ATP synthase F chain [Haliotis discus discus]	16087.2	602211	471112	507789	439625	615653	614158	640723	657852	591762	631044	499455
676449267	hypothetical protein LOTGIDRAFT_206275 [Lottia gigantea]	74420.8	77593.9	73949.6	68741.2	76413.1	76982.4	123982	74376.3	87305.3	111791	83214.5	132557
540357470	17beta-HSD14 [Azumapecten farreri]	295932	266227	280164	152300	159193	199087	367530	223133	276414	279716	406691	297055
676484286	hypothetical protein LOTGIDRAFT_235629 [Lottia gigantea]	81766.4	129374	180532	15786.6	76323.6	117765	99309.7	225057	112814	194506	112531	78391.8
762154676	PREDICTED: 26S proteasome non-ATPase regulatory subunit 2-like [Crassostrea gigas]	90404.8	150997	184611	91633.2	106765	131884	203375	133154	174109	136301	194511	192295
532525792	17 beta-hydroxysteroid dehydrogenase 10 [Mytilus galloprovincialis]	384687	413706	463602	294421	310691	364294	535068	440702	577648	430186	542245	523994
524885193	PREDICTED: neutral and basic amino acid transport protein rBAT-like [Aplysia californica]	910011	1.30619e+06	1.72649e+06	266299	374970	954126	1.52028e+06	527500	1.3275e+06	1.00162e+06	1.81604e+06	1.37275e+06
134141892	Na+/K+ ATPase beta subunit [Doryteuthis pealeii]	3.27652e+06	4.1402e+06	4.27299e+06	2.69447e+06	3.34698e+06	4.78292e+06	5.25893e+06	4.68915e+06	5.27169e+06	4.35468e+06	5.72383e+06	5.43519e+06
762158657	PREDICTED: ras-related C3 botulinum toxin substrate 1 isoform X2 [Crassostrea gigas]	37064.8	160061	185883	85762.9	96167.1	181140	184532	119479	152444	102705	287470	171614
676467228	hypothetical protein LOTGIDRAFT_228693 [Lottia gigantea]	94275.1	86810.8	113384	34499	16354.3	89885.4	123077	49046.5	110771	66931.6	141996	102129
762150750	PREDICTED: proteasome subunit beta type-6-like [Crassostrea gigas]	126456	194533	230660	16740.9	143237	178343	203170	157914	214215	212582	245828	180521
Q96SU4	OSBL9_HUMAN Oxysterol-binding protein-related protein 9 OS=Homo sapiens GN=OSBPL9 PE=1 SV=2	17046.1	15372.8	17648.2	10554.6	7477.36	13610.2	23524.1	11073.5	19131.9	16353.4	24544.9	16851.9
762091986	PREDICTED: short/branched chain specific acyl-CoA dehydrogenase, mitochondrial-like [Crassostrea gigas]	70134.2	93253	97152.4	58221.9	69569.3	99527.3	107645	100629	111132	89696.6	127519	128971
871249628	PREDICTED: sodium- and chloride-dependent glycine transporter 1-like [Aplysia californica]	10272.2	10437.2	9812.3	5843.58	37600.9	14930.5	20538.7	9884.29	26054.8	16586.8	28888.8	19304.1
212168837	S1 type peptidase [Octopus kaurna]	7362.03	9599.55	9431.16	9943.76	26835.9	30313.2	9318.25	10277.7	22137.1	8387.21	44194.4	33007.9
871236890	PREDICTED: presequence protease, mitochondrial-like [Aplysia californica]	27003	43286	56228.3	22352.9	41573.5	42372	50640.2	43536.4	54141.5	45142.9	60505.3	62463
19879230	peptidylglycine alpha-hydroxylating monooxygenase [Calliactis parasitica]	34468.7	37848.9	33702.9	34321.3	31305.8	31677.7	39972.6	35085.7	46074.1	62190.5	40918.3	51902.5
443694096	hypothetical protein CAPTEDRAFT_156850 [Capitella teleta]	730801	969754	738307	654869	535707	1.11087e+06	1.18226e+06	1.05467e+06	1.02177e+06	1.24861e+06	1.06738e+06	861418
675850534	hypothetical protein HELRODRAFT_190088 [Helobdella robusta]	67153	114389	115084	70090.2	86626.4	108515	129344	109221	130378	125879	142274	124353
13359159	D-lactate dehydrogenase [Octopus vulgaris]	539776	746117	665197	415464	389852	556473	813189	498017	764043	759432	917814	735275
795288454	PREDICTED: ADP-ribosylation factor 1 isoform X1 [Mandrillus leucophaeus]	1.17384e+06	1.22346e+06	1.23976e+06	991398	1.03409e+06	1.46511e+06	1.66349e+06	1.43406e+06	1.66378e+06	1.55126e+06	1.58722e+06	1.74663e+06
762130231	PREDICTED: actin-related protein 2/3 complex subunit 2-like [Crassostrea gigas]	121799	121190	122586	59506.4	70915.6	123187	166014	104603	146070	125544	161893	133592
676464997	hypothetical protein LOTGIDRAFT_233221 [Lottia gigantea]	48767.6	61611.1	242593	150988	191447	223327	56058.3	185122	256264	189613	322151	232830
260801054	hypothetical protein BRAFLDRAFT_119024 [Branchiostoma floridae]	751969	1.02641e+06	1.0383e+06	378377	588783	765793	1.03635e+06	814310	1.097e+06	842911	1.25124e+06	1.10805e+06
4519169	rhodopsin kinase [Enteroctopus dofleini]	770621	1.03074e+06	1.08008e+06	480791	452889	1.00818e+06	1.23015e+06	690467	1.16154e+06	1.02296e+06	1.38402e+06	1.02871e+06
676440800	hypothetical protein LOTGIDRAFT_113208 [Lottia gigantea]	148431	143305	181034	152363	50407.2	116686	192433	100999	159717	208927	235208	172452
742141753	PREDICTED: lysosomal protective protein [Esox lucius]	37775.6	28690.2	30441	32924.6	37920.6	32557.3	64138.4	40249.4	59069	19134.1	40962.4	46865.3
108999319	PREDICTED: 40S ribosomal protein S27-like [Macaca mulatta]	20726.7	28218.2	31497.3	4340.96	21779.1	20396.2	36845.9	19219.7	35016.3	22809.4	32350.8	25131.8
676446573	hypothetical protein LOTGIDRAFT_114341 [Lottia gigantea]	70308	88788	106567	42324	48463.1	87742.7	101545	110886	115455	78962.3	110523	81555.7
488595935	PREDICTED: LOW QUALITY PROTEIN: ADP-ribosylation factor-like protein 8B [Dasypus novemcinctus]	83415.1	150968	183523	139034	124795	185886	187904	150039	223300	191112	238766	178167
751446956	PREDICTED: coronin-7 isoform X1 [Bactrocera cucurbitae]	27594.6	32216.7	34882.6	10668.4	13597.1	22613.6	41682.3	13452.1	32916.6	28612.2	38688.1	35383.9
676455617	hypothetical protein LOTGIDRAFT_227257 [Lottia gigantea]	207501	124892	175836	41579.6	47865.9	113620	179532	100828	174510	132536	217057	153562
524902628	PREDICTED: mitochondrial peptide methionine sulfoxide reductase-like isoform X2 [Aplysia californica]	99553.6	54672.2	52723.7	62196.3	68330.6	49739.1	52552.3	75323	110921	90755.7	52424.4	139333
871248474	PREDICTED: calcium-transporting ATPase sarcoplasmic/endoplasmic reticulum type-like [Aplysia californica]	1.08587e+07	1.335e+07	1.69318e+07	4.34437e+06	4.52347e+06	9.37002e+06	1.59947e+07	5.96833e+06	1.30885e+07	1.19087e+07	1.93516e+07	1.35749e+07
188572548	putative 60S ribosomal protein RPL34 [Phoronis muelleri]	342674	380005	368219	207350	150413	227505	450498	268837	402772	500780	343161	288085
524870024	PREDICTED: 4-trimethylaminobutyraldehyde dehydrogenase-like [Aplysia californica]	23911.2	24734.8	25942.9	8797.07	11281.4	14509.8	27769.8	11993.6	31131.8	21377.7	33163.2	21358.2
156403949	predicted protein [Nematostella vectensis]	184323	229219	213853	122437	130534	230649	278442	253485	236356	202944	300167	222417
676430999	hypothetical protein LOTGIDRAFT_61417, partial [Lottia gigantea]	614425	790548	945955	277645	367228	642487	876916	455011	872569	620642	1.21475e+06	851584
726996852	PREDICTED: 28S ribosomal protein S29, mitochondrial [Corvus cornix cornix]	6366.27	6780.75	10765	10312.6	4655.98	8511.1	10346.2	10591.3	10414.8	12862.5	8571.94	10897.9
Q9Z2I8	SUCB2_MOUSE Succinate--CoA ligase [GDP-forming] subunit beta, mitochondrial OS=Mus musculus GN=Suclg2 PE=1 SV=3	501856	555504	497212	513456	409534	563478	737830	550490	668022	729052	717977	682619
260828969	hypothetical protein BRAFLDRAFT_93494 [Branchiostoma floridae]	43067.3	53821.8	52125.6	59657.6	49168.1	66712	85753.6	47069.4	73061.8	72534.8	87382.8	70269.2
683911151	PREDICTED: diamine acetyltransferase 1 isoform X1 [Serinus canaria]	20657.2	20736.4	20998.2	13426.2	12205.8	22953.6	26778.7	16941.3	23147.7	22049.2	33790.7	26256.2
676488022	hypothetical protein LOTGIDRAFT_221777 [Lottia gigantea]	241886	243317	334694	103929	103384	203337	337499	139869	294919	211164	366226	300026
469566230	beta actin, partial [Microtus levis]	515957	718174	787139	340101	466022	730398	922162	471958	861089	598578	1.13187e+06	782179
110671434	putative mitochondrial NADH dehydrogenase (ubiquinone) 1 alpha subcomplex [Diaphorina citri]	462586	937985	738565	904885	722293	938179	1.0172e+06	1.39031e+06	998649	1.09609e+06	904494	895725
676464651	hypothetical protein LOTGIDRAFT_121010, partial [Lottia gigantea]	130629	116151	125193	80964.5	112513	113897	129902	135950	179477	120813	191429	152382
762112118	PREDICTED: signal peptidase complex subunit 3-like [Crassostrea gigas]	26299.8	30536.6	28577.7	22230.6	25459.4	41499.2	45248	28921.7	40183.3	37324.3	45718	36233.6
762151899	PREDICTED: aspartate--tRNA ligase, cytoplasmic-like isoform X2 [Crassostrea gigas]	215146	288252	353696	167189	249976	324712	411125	213494	390513	332306	428045	363768
113207856	pyruvate kinase [Crassostrea gigas]	1.53374e+06	1.8424e+06	2.59774e+06	490833	495640	1.40082e+06	2.32829e+06	599118	1.92364e+06	1.40178e+06	2.98252e+06	1.95021e+06
780087860	PREDICTED: alanine--glyoxylate aminotransferase 2, mitochondrial [Strongylocentrotus purpuratus]	319298	416559	565528	185244	199560	340533	579954	276209	402336	385245	585803	481330
Q8IS64	ECE_LOCMI Endothelin-converting enzyme homolog OS=Locusta migratoria PE=2 SV=1	18912.2	25936.3	29179.5	14741.8	17908.9	28863.8	30401.1	27353.8	32654.5	25719.5	35983.4	29156.2
762111883	PREDICTED: UPF0160 protein MYG1, mitochondrial-like isoform X2 [Crassostrea gigas]	117534	108813	143079	62864.8	42197.8	94281.1	170328	21459.5	137775	109526	166717	154840
676487994	hypothetical protein LOTGIDRAFT_97846, partial [Lottia gigantea]	200656	285171	312628	78867.5	122442	236545	272059	188252	259785	226876	430436	274915
126697448	proteasome subunit N3 [Haliotis discus discus]	251222	312546	306931	161537	157053	255113	327547	291654	324624	316108	342788	327549
676422346	hypothetical protein LOTGIDRAFT_102908 [Lottia gigantea]	117724	78442.6	74042.5	152804	125251	205267	184588	105961	209825	167490	124444	214657
871207914	PREDICTED: transient receptor potential cation channel subfamily A member 1 homolog [Aplysia californica]	61557.9	56040.4	80344.9	31533.5	40576.4	58227.9	103867	46786.2	64398.2	59968.6	62620.4	100719
126697376	proteasome alpha type 2 [Haliotis discus discus]	209808	268386	314910	107654	156576	220066	325001	185871	287391	246987	359160	301183
387598171	nuclear RNA binding protein Nop10, partial [Ostrea edulis]	26918.5	35156.7	22781	40412.9	4733.98	30576.4	32717.4	38691.5	40124.1	37745.9	28869.2	36128.1
871228537	PREDICTED: tensin-3-like isoform X8 [Aplysia californica]	131753	159146	241290	118858	123002	191309	236861	135725	207651	196784	285670	224922
676468597	hypothetical protein LOTGIDRAFT_217535 [Lottia gigantea]	860511	1.14082e+06	1.45006e+06	543812	641254	1.03257e+06	1.33714e+06	927014	1.2629e+06	1.07329e+06	1.62754e+06	1.32734e+06
676496239	hypothetical protein LOTGIDRAFT_198201 [Lottia gigantea]	102083	151277	130323	103508	103913	148382	172575	148464	166561	191154	157238	149222
676463904	hypothetical protein LOTGIDRAFT_178649 [Lottia gigantea]	72318	119549	156224	27105.4	26924.5	72639.9	144885	43338.9	100916	84630.3	141225	117460
387598203	ribosomal protein S7 [Ostrea edulis]	621585	817752	789410	670178	670503	840292	900041	1.06173e+06	1.01481e+06	996767	909934	990992
808858109	Serine/threonine-protein phosphatase PP1-beta catalytic subunit [Larimichthys crocea]	22592.3	17173.7	6776.54	37378.5	14921.2	18482.1	23175.3	11214.3	18613.5	65125.1	27485.4	10596.5
871234002	PREDICTED: ATP-binding cassette sub-family F member 2-like [Aplysia californica]	238880	206633	280881	191943	193794	201976	331249	232866	289390	294485	313635	287826
524878114	PREDICTED: probable glutathione S-transferase [Aplysia californica]	56033.6	128994	138538	125337	87349.2	108015	175911	160328	105555	197886	67952.9	150034
524899671	PREDICTED: very long-chain specific acyl-CoA dehydrogenase, mitochondrial-like [Aplysia californica]	269451	318806	284592	265855	303642	352230	429207	358035	474245	333788	463779	329572
574957971	tandem-repeat galectin [Euprymna scolopes]	92938.2	79347.3	95424.1	24096	21765.3	53729.5	115436	45819.6	91122.4	51876	128299	56193.5
871261488	PREDICTED: nicotinate phosphoribosyltransferase-like [Aplysia californica]	93679.5	84331.9	126462	26299	24831.1	74596.8	129154	48550.2	85062.1	76262.6	140596	92730.8
808860441	Diacylglycerol kinase beta [Larimichthys crocea]	98359.7	137197	135383	48389.8	41679.7	107476	113506	131740	139052	113331	141911	116185
524892971	PREDICTED: NADH dehydrogenase [ubiquinone] 1 beta subcomplex subunit 5, mitochondrial-like [Aplysia californica]	15542.1	37632.7	15246.4	20230.9	28666.8	34101.2	19112.9	27788.4	34764.7	44207.7	37259.1	38156.5
677969078	PREDICTED: fatty acid-binding protein, liver [Acanthisitta chloris]	1.67017e+06	1.98743e+06	1.67221e+06	1.44214e+06	1.98599e+06	1.52112e+06	2.41302e+06	2.3762e+06	2.71333e+06	1.88925e+06	2.2449e+06	2.02674e+06
637310534	PREDICTED: probable acyl-CoA dehydrogenase 6 [Anolis carolinensis]	78628.4	96372.3	115533	44012.1	69505.9	92031.6	100818	102980	119735	108104	120997	106530
594110361	PREDICTED: tissue alpha-L-fucosidase [Bubalus bubalis]	27757	43689.4	38026.5	22737.4	15669.8	29902.7	52909.5	15462.2	38527.6	41774.4	59825	27584
68272049	guanine nucleotide-binding protein Rho [Biomphalaria glabrata]	95465	140812	152693	99504.1	93850.9	155623	173061	146568	173805	142701	182869	160642
405954145	Anoctamin-4 [Crassostrea gigas]	7157.52	5803.71	12497.6	17219.2	11520.6	20500.1	22240	7806.95	21247.1	7053.75	18720.2	22082.4
166406862	ribosomal protein S8 [Haliotis diversicolor]	972361	1.14352e+06	1.16353e+06	650361	510335	708353	1.21084e+06	1.00509e+06	1.17504e+06	1.28748e+06	1.19259e+06	953574
443682329	hypothetical protein CAPTEDRAFT_156174 [Capitella teleta]	626330	646078	761785	442778	387635	580388	980459	492437	717421	781604	893210	701385
524883554	PREDICTED: minor histocompatibility antigen H13-like [Aplysia californica]	120026	157976	186898	84114.2	79655	141676	201971	91463	179184	159788	226715	161180
126697366	l-3-hydroxyacyl-coenzyme a dehydrogenase, short chain [Haliotis discus discus]	777125	795811	832326	554315	716790	982048	848426	1.10674e+06	1.21167e+06	879466	1.11207e+06	1.00743e+06
126697398	signal sequence receptor beta-like protein [Haliotis discus discus]	504352	640141	579814	334779	367746	633975	648396	711915	767747	578561	720947	621952
432105433	Small nuclear ribonucleoprotein Sm D1 [Myotis davidii]	37059.1	43281.4	64135.1	29516.3	29172.2	43281.9	60665.7	52649.9	49411.7	61078.2	57272.6	44956.5
762142931	PREDICTED: ketimine reductase mu-crystallin-like [Crassostrea gigas]	40199	80918	109347	103594	67803.4	75680.8	114932	69930.9	104048	104170	126880	111795
D4A6L0	GP158_RAT Probable G-protein coupled receptor 158 OS=Rattus norvegicus GN=Gpr158 PE=1 SV=1	9665.84	8122.01	10095	8613.49	14081.9	5153.52	11397.4	14762.1	14750.3	11539	13476.9	7792.23
676438247	hypothetical protein LOTGIDRAFT_200644 [Lottia gigantea]	49267.4	39101.6	59666.6	30207.7	22411.1	60521.8	59155.6	26232.1	67742.4	54951.6	59984.2	77363.4
2760013	actin related protein [Lumbricus rubellus]	3950.61	237505	154101	268138	206533	232055	250210	277562	228786	315171	187031	198989
762158877	PREDICTED: fatty acid-binding protein homolog 5-like [Crassostrea gigas]	380558	752192	671914	312688	316261	414342	875136	661616	505573	550767	611214	560559
6978487	fructose-bisphosphate aldolase A [Rattus norvegicus]	15261.8	31670.7	17763.4	7384.13	8516.37	12857.4	16060.4	24006.5	15276.4	20044.2	13938.2	34106.7
762135054	PREDICTED: hydroxyacid-oxoacid transhydrogenase, mitochondrial-like isoform X2 [Crassostrea gigas]	159560	200567	254566	138370	262031	197553	296343	201512	293911	207029	323028	279405
283837552	serine protease 2 [Heterololigo bleekeri]	87585	97094.4	114044	99964.2	134912	87754.9	135480	163649	99729.4	137679	115682	167807
871255628	PREDICTED: alpha-N-acetylglucosaminidase-like isoform X1 [Aplysia californica]	51915.3	30959.3	40172.6	40252	28315.8	32668.1	69926.2	45399.4	52997.3	26409.6	53850.5	47360.6
676489622	hypothetical protein LOTGIDRAFT_196809 [Lottia gigantea]	521853	481531	557891	226690	403292	576364	608568	487895	700707	502406	663847	686763
242016069	synapsin, putative [Pediculus humanus corporis]	63381.8	115983	130460	30160	27296.4	66318.9	113871	53202.2	90581.1	80511.6	131745	101778
871213919	PREDICTED: 3-hydroxybutyrate dehydrogenase type 2-like [Aplysia californica]	22445.3	32928.3	54017.2	26870.8	32431.5	36681.6	47999.8	30875.9	48601.2	59647.1	47365.4	36094.2
8778048	phospholipase C [Doryteuthis pealeii]	135937	172111	238457	155044	134183	183847	242645	72949.1	262794	191226	325096	246373
762072446	PREDICTED: inosine-5'-monophosphate dehydrogenase 1b-like isoform X3 [Crassostrea gigas]	84132.6	100289	132680	44154.5	34442.4	89116.9	118816	53931.8	112794	97402.4	140504	114017
443691588	hypothetical protein CAPTEDRAFT_228449 [Capitella teleta]	420005	515434	704178	117398	138733	436542	622949	169542	544594	353445	850108	525351
676439890	hypothetical protein LOTGIDRAFT_238600 [Lottia gigantea]	66927.4	116494	132964	42776.2	65828.6	101140	112771	88129.9	110353	106904	139618	133770
871250521	PREDICTED: atlastin-like isoform X3 [Aplysia californica]	64304.6	73034.2	83023.8	43942.5	43824.8	58970.7	87374.8	62799.7	75523.7	75948.6	98589.9	82024.5
762120077	PREDICTED: prickle-like protein 3 isoform X6 [Crassostrea gigas]	1.02894e+06	1.38078e+06	1.21817e+06	280032	601821	1.14857e+06	1.58053e+06	698567	1.37296e+06	783700	1.81013e+06	1.18563e+06
762070867	PREDICTED: phosphoenolpyruvate carboxykinase, cytosolic [GTP]-like isoform X1 [Crassostrea gigas]	328288	476884	493249	330809	375011	411496	577212	375824	597328	404212	692866	522416
548344049	PREDICTED: adenosylhomocysteinase B-like [Pundamilia nyererei]	2.33614e+06	2.29797e+06	2.80005e+06	1.50404e+06	1.38043e+06	2.26614e+06	3.24554e+06	1.60336e+06	2.90332e+06	2.61928e+06	3.1938e+06	2.94803e+06
676432714	hypothetical protein LOTGIDRAFT_199566 [Lottia gigantea]	390791	534822	732505	276733	244945	382539	664007	276792	579989	416844	807327	614961
762133002	PREDICTED: malate dehydrogenase, cytoplasmic-like [Crassostrea gigas]	987792	1.04941e+06	1.28842e+06	450870	495676	925799	1.22456e+06	637081	1.20008e+06	900444	1.50179e+06	1.35075e+06
554820859	PREDICTED: thymidine phosphorylase-like isoform X1 [Haplochromis burtoni]	77059.9	98034.2	90038.7	64066.7	53215.7	128432	130906	83581	129429	90428.6	126192	109133
212168954	S1 type peptidase [Octopus kaurna]	489767	1.59677e+06	1.58558e+06	360582	409120	1.11345e+06	1.65919e+06	969495	882894	949130	1.4698e+06	1.34904e+06
676471666	hypothetical protein LOTGIDRAFT_192340 [Lottia gigantea]	553738	495461	537340	650473	613936	904304	803027	592050	859333	938773	918139	808571
676474761	hypothetical protein LOTGIDRAFT_229102 [Lottia gigantea]	238216	242613	280972	195661	163749	289903	296383	246479	331446	259850	342823	369914
762140300	PREDICTED: succinate-semialdehyde dehydrogenase, mitochondrial-like isoform X4 [Crassostrea gigas]	74760.5	105673	129484	53420.9	64549.2	101431	90770.5	78216.5	133912	113848	155632	120372
762156710	PREDICTED: isoleucine--tRNA ligase, cytoplasmic-like [Crassostrea gigas]	105240	126235	163535	81245.6	104867	114712	167677	71212.9	160239	129382	191793	189855
762122623	PREDICTED: peptidyl-prolyl cis-trans isomerase-like [Crassostrea gigas]	237959	362528	331151	180391	211444	292703	303800	326186	412579	329053	432498	308601
762102257	PREDICTED: beta-ureidopropionase-like [Crassostrea gigas]	186159	214036	140584	107746	135851	209991	169990	186418	228997	192254	294114	226995
762164432	PREDICTED: coatomer subunit alpha-like [Crassostrea gigas]	259387	295265	377730	205440	159292	260498	391885	194618	373652	297505	424695	351991
676480505	hypothetical protein LOTGIDRAFT_183527 [Lottia gigantea]	92498.9	128302	104815	31185.1	75457.8	111483	128841	57311.3	158057	123634	132456	109244
Q6NV04	ILVBL_DANRE Acetolactate synthase-like protein OS=Danio rerio GN=ilvbl PE=2 SV=1	40784.8	47861.4	66138.2	47343.3	7783.48	30598.9	62754.6	21059.1	48353.4	43990.9	88171.2	49484.3
676445630	hypothetical protein LOTGIDRAFT_174238 [Lottia gigantea]	23105.8	19064.8	26099.2	9004.77	8075.17	22053.2	27199	18363.4	23036.1	22400.4	27790.1	21255
312032364	LYR motif-containing protein 4 [Taeniopygia guttata]	66590	37588.5	28584.3	68351.4	39055.2	42973	43011.6	100154	49084.6	88242.5	45503.5	43160.8
551523976	PREDICTED: enoyl-CoA hydratase, mitochondrial-like [Xiphophorus maculatus]	528306	535670	552557	398953	429288	605431	642547	610829	733725	609237	692557	685083
676494563	hypothetical protein LOTGIDRAFT_203293 [Lottia gigantea]	186838	325621	292213	307092	264680	347692	340490	366966	436091	358003	406729	337738
762091417	PREDICTED: probable inactive serine/threonine-protein kinase DDB_G0274613 [Crassostrea gigas]	96110.4	40735.1	35688.4	209724	132779	131196	101194	78396.6	192202	146979	132818	189669
212168866	S1 type peptidase [Octopus kaurna]	1.13122e+06	1.46255e+06	1.69933e+06	832845	1.20263e+06	1.16223e+06	1.74979e+06	1.89277e+06	1.16773e+06	1.46556e+06	1.41469e+06	2.05955e+06
530636675	PREDICTED: protein SCO1 homolog, mitochondrial isoform X1 [Chrysemys picta bellii]	18920.4	23215.6	19618.5	8792.93	23044.8	30067.3	24286.8	29953.9	25806.4	30397.8	26047.7	24457.5
260798602	hypothetical protein BRAFLDRAFT_275580 [Branchiostoma floridae]	11809.8	19689.9	21755.8	9734.94	7872.51	15708.8	25228.5	13197.4	16163.3	17195.9	15725.2	25108.7
676480556	hypothetical protein LOTGIDRAFT_107196 [Lottia gigantea]	101969	109429	107543	92091.1	35836.7	131638	82818.8	174466	144838	156917	126443	66996.1
676485576	hypothetical protein LOTGIDRAFT_154947 [Lottia gigantea]	258128	313204	425430	147256	160002	266524	390559	177410	373804	315114	432900	351816
676494881	hypothetical protein LOTGIDRAFT_109031, partial [Lottia gigantea]	256704	401930	488551	353859	204595	398504	472843	268279	493150	385051	633154	478293
762148434	PREDICTED: acylamino-acid-releasing enzyme-like isoform X1 [Crassostrea gigas]	122872	180204	235142	55218.5	119957	130518	223418	100886	157761	156950	249155	206844
565056041	serpin 3 [Penaeus monodon]	57016.7	45491.9	49541.8	33133.8	17682.8	47132.1	43227.1	50308.1	58703.9	61234.5	50572.9	60211.5
762092656	PREDICTED: L-threonine 3-dehydrogenase, mitochondrial-like [Crassostrea gigas]	102309	132029	124381	106046	80900.5	136813	141605	120244	158490	151750	131315	181693
685832194	Nucleoside phosphorylase domain and Uridine phosphorylase, eukaryotic family-containing protein [Strongyloides ratti]	105088	138618	90143.1	130219	112215	100551	150758	98138.3	182545	142984	167423	135858
443692853	hypothetical protein CAPTEDRAFT_221292 [Capitella teleta]	1.3593e+06	940413	897421	942732	945233	1.15908e+06	1.46399e+06	1.46817e+06	1.28753e+06	1.0941e+06	1.6069e+06	1.17597e+06
676439544	hypothetical protein LOTGIDRAFT_140722 [Lottia gigantea]	436747	549023	567194	291424	378258	374000	591645	486320	560771	468215	687201	572284
762112864	PREDICTED: septin-11-like isoform X1 [Crassostrea gigas]	148106	183016	233759	82376.7	56493.5	146499	194335	109606	185621	183357	245071	184261
762101367	PREDICTED: protein IWS1 homolog [Crassostrea gigas]	25490.3	37342.6	32836.1	21534	16102.8	9544.47	32702.9	28468.6	27385.9	29046.3	34927.7	32508.7
Q6PGF2	MORN4_MOUSE MORN repeat-containing protein 4 OS=Mus musculus GN=Morn4 PE=2 SV=1	10181.5	56036.4	51465.9	27856.2	10807.1	44870.2	48679.5	31830.8	60376.6	7337.78	79567.7	32618.1
676422164	hypothetical protein LOTGIDRAFT_205560 [Lottia gigantea]	415276	249547	361486	238110	196129	309036	536082	265964	545160	296820	289373	354101
762104988	PREDICTED: glycine dehydrogenase (decarboxylating), mitochondrial-like isoform X2 [Crassostrea gigas]	217884	361773	466855	233096	114173	273135	461629	189524	359132	273439	519264	350913
Q8JZQ2	AFG32_MOUSE AFG3-like protein 2 OS=Mus musculus GN=Afg3l2 PE=1 SV=1	53811.3	36761.4	45374.8	42780	34566.6	48935	59460.6	45377.2	64943.8	51063.1	64587.6	53403.8
762129988	PREDICTED: brefeldin A-inhibited guanine nucleotide-exchange protein 1-like isoform X6 [Crassostrea gigas]	10849.6	16189.9	17331.2	22452	20789.8	18236.9	16277.7	31925.3	24809.6	29270.7	10686.2	23768.1
676432101	hypothetical protein LOTGIDRAFT_111165 [Lottia gigantea]	8605.39	13742.6	14294.7	8089.67	8589.03	11401.5	15298.5	8627.81	15214.3	11423.3	19497.7	13527.5
762142180	PREDICTED: MAGUK p55 subfamily member 6-like [Crassostrea gigas]	127366	120863	93038.7	139673	137120	131488	147256	140945	166729	188213	150316	174483
829098699	rhodopsin [Octopus vulgaris]	3.13053e+06	4.87548e+06	5.26384e+06	1.88241e+06	2.05784e+06	4.41755e+06	5.65423e+06	2.31308e+06	4.78759e+06	3.85017e+06	6.58475e+06	4.73185e+06
524890839	PREDICTED: ras-related protein Rab-2 [Aplysia californica]	1.00836e+06	1.15488e+06	1.17208e+06	1.12033e+06	971635	1.43436e+06	1.46535e+06	1.24666e+06	1.5898e+06	1.56732e+06	1.48124e+06	1.50809e+06
557132944	actin [Rapana venosa]	176097	103779	79612.7	210284	162301	173443	174765	181717	224055	207160	146427	234764
524900993	PREDICTED: protein SEC13 homolog [Aplysia californica]	73179.4	103757	156751	59882.1	47780.4	99998	138704	50577.8	131666	84710.1	161759	131364
524865306	PREDICTED: peroxiredoxin-2-like [Aplysia californica]	494735	436353	502803	404779	470408	522787	650158	555354	725604	475193	556033	690796
354992474	alkaline phosphatase 1 [Euprymna scolopes]	44008.6	49768.8	38479.3	9421.7	21092.3	38154.9	41602.6	44102.7	46115.5	38511.1	42085.9	46657.2
51859635	ribosomal protein L7 [Doryteuthis pealeii]	165718	220073	252904	102008	88406.6	150595	256314	162267	229826	201050	245012	168632
524886705	PREDICTED: mannose-1-phosphate guanyltransferase alpha-B-like isoform X2 [Aplysia californica]	50306.4	45089.6	41167.7	60313.9	52831.8	59818.7	62765.1	54879.2	72628.6	72451.6	59376.4	76789.1
762157165	PREDICTED: tripeptidyl-peptidase 2-like [Crassostrea gigas]	102073	119033	184636	102507	52706	92562.5	160681	61586.9	155162	112863	196628	155160
762097545	PREDICTED: AP-1 complex subunit beta-1-like [Crassostrea gigas]	538626	572242	537823	550051	407190	598391	715532	729840	640830	746467	686739	608642
762072037	PREDICTED: tyrosine-protein kinase Src42A-like [Crassostrea gigas]	131978	57872.7	93533.7	64633	79069.2	49055	75391.3	71735.4	138609	80148.2	167249	80168.8
762130732	PREDICTED: protein henna-like isoform X3 [Crassostrea gigas]	152639	203586	228082	146486	164062	176525	268108	223215	237436	228569	231943	190258
765116061	PREDICTED: pyruvate kinase PKM isoform X1 [Oryzias latipes]	68093.4	109999	126432	118151	39304.8	137578	117385	52338.3	151744	93024.9	153881	202346
762138581	PREDICTED: C-1-tetrahydrofolate synthase, cytoplasmic-like [Crassostrea gigas]	185953	201330	183893	154854	171068	161210	219243	184340	256299	219723	264659	215583
121543815	putative ribosomal protein L11 [Maconellicoccus hirsutus]	301341	399635	401423	189495	192098	297797	440685	318469	399723	365104	419069	346213
675874566	hypothetical protein HELRODRAFT_185039 [Helobdella robusta]	215396	172927	245343	171124	62247.7	131816	233951	209406	198699	201697	210177	229358
762086880	PREDICTED: 4-hydroxyphenylpyruvate dioxygenase-like [Crassostrea gigas]	553536	1.00512e+06	943640	381740	511726	924060	980631	819378	930464	775327	997710	1.04378e+06
662203411	PREDICTED: putative uncharacterized protein DDB_G0282133 [Diaphorina citri]	45533.9	42139.3	31298.5	46715	54060.6	4861.47	39554	66985.8	50011.4	43528.9	42373.5	45974.9
524889199	PREDICTED: dolichyl-diphosphooligosaccharide--protein glycosyltransferase 48 kDa subunit [Aplysia californica]	81660.9	107024	126840	53659.5	68979.5	78958.6	125806	66507	113040	87280.1	142599	128525
762111269	PREDICTED: ATP-citrate synthase-like isoform X1 [Crassostrea gigas]	291172	301047	359693	178944	154948	260130	400807	131380	369452	298799	423340	359641
676461912	hypothetical protein LOTGIDRAFT_216266 [Lottia gigantea]	95405.1	82538.7	125404	37866.1	56123.7	86903.3	156190	34743.9	104216	80885.3	135421	109535
602626655	PREDICTED: uroporphyrinogen decarboxylase isoform X2 [Python bivittatus]	19753.7	23907.2	35964.2	24532.3	19368.5	24442.7	40517.9	22984.8	35765.2	11887.1	46581.3	32010.7
597786607	PREDICTED: F-actin-capping protein subunit beta isoforms 1 and 2 isoform X2 [Astyanax mexicanus]	167286	160502	166606	140633	128140	187734	207461	143255	206618	208328	225922	227699
676489500	hypothetical protein LOTGIDRAFT_196756 [Lottia gigantea]	158508	200272	217435	105171	114931	169155	232994	157418	222067	190986	215494	218930
329757160	40S ribosomal protein S15a [Pectinaria gouldii]	549279	797097	997949	490002	437275	767810	1.00103e+06	704155	908418	742933	1.03363e+06	788847
524876074	PREDICTED: bis(5'-nucleosyl)-tetraphosphatase [asymmetrical]-like [Aplysia californica]	21131.3	69245.9	48583.4	37136.5	49624	52813.5	61776.3	75671.1	52652.6	80490.6	39848.2	46629.6
524864532	PREDICTED: NADH dehydrogenase [ubiquinone] 1 alpha subcomplex subunit 10, mitochondrial-like [Aplysia californica]	353500	417813	383836	377627	333049	431816	500866	505467	507203	529684	461899	440196
762098834	PREDICTED: uncharacterized protein LOC105331373 [Crassostrea gigas]	52078.3	117640	57332.8	90295.1	40340.6	117082	94436.5	74795.3	89464.8	108282	167517	73986.5
524879322	PREDICTED: pyruvate dehydrogenase phosphatase regulatory subunit, mitochondrial-like [Aplysia californica]	37411.4	46948.4	67224.9	7899.07	7099.78	36798.5	47101.2	39684.2	38727.2	38938.1	49827.2	46372.3
524873045	PREDICTED: cytochrome c oxidase subunit 4 isoform 1, mitochondrial-like [Aplysia californica]	382744	456316	396364	285074	284538	415268	501440	440163	486055	432270	551005	432731
641668490	PREDICTED: cytochrome c oxidase subunit 6C [Acyrthosiphon pisum]	534081	832460	720759	672401	501666	585991	891420	1.05476e+06	709948	793943	697088	771886
348575396	PREDICTED: calmodulin-like protein 5 [Cavia porcellus]	211434	149832	165594	249892	268846	191804	204240	336762	237415	308507	197238	297769
762124647	PREDICTED: transmembrane emp24 domain-containing protein 9-like isoform X2 [Crassostrea gigas]	145764	210347	194004	144894	154189	216014	231200	227476	226955	213421	224538	235399
762070756	PREDICTED: glutathione S-transferase A-like [Crassostrea gigas]	307419	301946	246461	354411	290377	384572	429155	311248	377578	500574	363693	422635
410935705	thioester-containing protein 1 [Euprymna scolopes]	3.26204e+06	4.25766e+06	4.66039e+06	1.09917e+06	2.16645e+06	3.17708e+06	3.97855e+06	3.3185e+06	3.56857e+06	3.17639e+06	5.1975e+06	4.50522e+06
762086228	PREDICTED: proteasomal ubiquitin receptor ADRM1-B-like [Crassostrea gigas]	104001	97151.5	110820	75664.5	75173.7	124145	122074	110954	135257	119745	123702	136655
Q9U5Z8	PSMD3_ANOST Probable 26S proteasome non-ATPase regulatory subunit 3 OS=Anopheles stephensi GN=DOXA2 PE=3 SV=1	130385	148577	189843	100226	91955	154155	194957	100059	180185	176931	209904	176938
676443439	hypothetical protein LOTGIDRAFT_226274 [Lottia gigantea]	100579	176505	233120	94696.5	90504.5	154132	230342	83141.1	203661	87429.2	267176	210992
147905508	proteasome alpha 4 subunit [Xenopus laevis]	447684	573888	641022	299960	353106	482993	664871	419609	583907	556077	771176	567969
871268218	PREDICTED: ATP-dependent 6-phosphofructokinase-like [Aplysia californica]	661495	964153	645339	396211	376326	757815	523077	547085	1.11199e+06	989165	1.21738e+06	451526
676454182	hypothetical protein LOTGIDRAFT_188441 [Lottia gigantea]	44916.5	93291.9	123038	44411.5	24281.3	48901	103218	43529.7	81412.9	64859.4	116470	72868.1
524886026	PREDICTED: vacuolar protein sorting-associated protein 4B-like [Aplysia californica]	119751	85262.5	130459	103074	156517	160175	160281	177755	160923	159488	140851	161219
209180427	Rho GDP dissociation inhibitor [Acyrthosiphon pisum]	1.23172e+06	1.16333e+06	1.29294e+06	947972	867873	1.16967e+06	1.46535e+06	1.08015e+06	1.52744e+06	1.32921e+06	1.62919e+06	1.45356e+06
198417756	PREDICTED: gamma-glutamyltranspeptidase 1 [Ciona intestinalis]	12764.2	32369.9	24223.5	29689.2	16160.1	45289.3	34311.4	29955.3	43843.8	32677.3	38520.4	24665.2
762113209	PREDICTED: regucalcin-like [Crassostrea gigas]	152924	218084	240487	109275	125339	166565	233146	168889	215667	190885	271187	207213
676441940	hypothetical protein LOTGIDRAFT_238761 [Lottia gigantea]	56641.1	64489.6	26552.5	50408.5	48763.5	17375.2	52746.6	73655.9	60805.6	15182.9	79340.3	54062.3
871247421	PREDICTED: uncharacterized protein LOC101863199 [Aplysia californica]	39089.6	54097.4	63226.6	22041.7	15124.5	43459.3	58821.8	29936.5	48231.7	43108.8	75956.2	45074.2
P11178	ODBA_BOVIN 2-oxoisovalerate dehydrogenase subunit alpha, mitochondrial OS=Bos taurus GN=BCKDHA PE=1 SV=1	98761.7	128799	106567	66692.7	69992	84073.3	107064	130493	121720	93986.8	132161	119258
524907610	PREDICTED: protein disulfide-isomerase A6-like [Aplysia californica]	901766	961417	941326	798496	847798	1.09018e+06	1.12728e+06	1.04962e+06	1.29117e+06	1.2096e+06	1.17963e+06	1.17571e+06
676486914	hypothetical protein LOTGIDRAFT_235879 [Lottia gigantea]	94405.6	108370	114207	73290.4	83205.2	142136	132190	119612	129684	133860	152209	113492
735659669	I-type lectin-like protein 5 [Littorina littorea]	2429	4482.05	6492.35	7598.91	4121.88	7507.46	10038.7	6327.47	8385.08	5703.31	1732.86	9206.26
762087391	PREDICTED: omega-amidase NIT2-B-like [Crassostrea gigas]	54956.3	56676.9	70953.4	4313.15	37958.8	57784.5	52883.9	43989	73618.5	61433.1	81131.2	44948.2
524906491	PREDICTED: elongation factor 2-like [Aplysia californica]	2.80739e+06	3.22727e+06	4.06761e+06	2.17005e+06	1.99618e+06	2.46456e+06	4.39673e+06	2.32111e+06	3.65153e+06	3.12358e+06	4.07114e+06	3.62146e+06
676432988	hypothetical protein LOTGIDRAFT_237927 [Lottia gigantea]	5679.43	23974.1	19191.8	32914.3	30185.5	22234.4	18579.4	42806.1	25719.9	40364.6	21067.8	21329.4
762101003	PREDICTED: eukaryotic translation initiation factor 3 subunit B-like [Crassostrea gigas]	218584	339099	549576	166601	116657	280977	435820	157640	311024	265706	552200	393398
148704663	mCG3164, partial [Mus musculus]	81000	102883	119659	81736.9	70242.2	130919	139845	91843	133208	112047	143709	121652
676425489	hypothetical protein LOTGIDRAFT_229950 [Lottia gigantea]	647402	709387	650198	485001	362722	590042	797591	472692	779873	815851	816813	676663
212168866	S1 type peptidase [Octopus kaurna]	557325	728177	818636	451934	623966	490761	1.03994e+06	743282	480752	627465	546884	1.20487e+06
676483748	hypothetical protein LOTGIDRAFT_220834 [Lottia gigantea]	51156.8	37677.1	53452.7	28148.4	23269.2	37136.1	61141.6	44470.1	45068.3	37313	50236.5	53576
762103723	PREDICTED: AP-2 complex subunit alpha-2-like isoform X2 [Crassostrea gigas]	232488	233973	345560	216557	167341	271869	326449	201436	340655	279158	397785	307937
762143735	PREDICTED: triosephosphate isomerase-like [Crassostrea gigas]	3.17928e+06	3.70821e+06	4.72486e+06	1.65101e+06	1.60864e+06	3.34252e+06	4.19161e+06	2.13838e+06	4.42989e+06	3.24688e+06	5.34506e+06	3.64099e+06
762095043	PREDICTED: 60S ribosomal protein L4-like [Crassostrea gigas]	918488	1.1445e+06	1.2898e+06	515683	554804	699785	1.19345e+06	882866	1.1452e+06	1.04005e+06	1.21323e+06	986501
676420817	hypothetical protein LOTGIDRAFT_227857 [Lottia gigantea]	242806	236763	221879	200412	198919	166090	294748	155514	297569	315888	257139	276886
405969029	Putative phospholipase B-like 2 [Crassostrea gigas]	86826.1	24646.2	28539.4	49753.9	132385	26624.2	65417.1	72866.1	69970.6	95008.4	66636	69881.4
676484163	hypothetical protein LOTGIDRAFT_235604 [Lottia gigantea]	90802.9	118526	73245.8	89733.1	130762	92192.5	104144	188364	98650.2	135275	79845.5	143113
762128030	PREDICTED: cytosolic non-specific dipeptidase-like [Crassostrea gigas]	586859	773609	844409	400850	395266	683252	1.03241e+06	526310	907759	579892	807253	783885
13096244	A Chain A, Crystal Structure Analysis Of Neuronal Sec1 From The Squid L. Pealei	110129	142329	239558	108724	83050.8	122796	257861	98535.1	136427	127520	187373	207213
762150706	PREDICTED: nuclear cap-binding protein subunit 1-like [Crassostrea gigas]	13016.3	52469.3	55247.5	34714.9	36639.5	39226.4	60680.6	25687	51708.8	53690	70062.7	29220.2
324105255	ribosomal protein rpl6 [Glycera tridactyla]	241335	307936	393750	227554	160350	227825	375169	255198	353522	277441	360971	337257
762122530	PREDICTED: kyphoscoliosis peptidase-like isoform X2 [Crassostrea gigas]	429341	501021	560915	280362	347857	457026	573086	268337	607051	450386	737024	602458
762104199	PREDICTED: multifunctional protein ADE2-like [Crassostrea gigas]	188706	194532	235032	82492.4	62632.9	154122	231354	110333	199415	162604	225350	224118
762072039	PREDICTED: uncharacterized protein LOC105328889 isoform X1 [Crassostrea gigas]	11252.8	6494.12	8042.85	26884.1	9110.7	12905.9	13123.3	17553.6	12979.8	26208	10198.3	13803.2
432911327	PREDICTED: purine nucleoside phosphorylase-like [Oryzias latipes]	481574	600992	780988	349969	307732	497432	806967	361126	609542	557537	834514	623524
443698586	hypothetical protein CAPTEDRAFT_128252 [Capitella teleta]	458427	532935	704187	293879	220688	654920	795895	471736	544328	559098	782983	445527
762089031	PREDICTED: cystathionine gamma-lyase-like isoform X3 [Crassostrea gigas]	305667	492792	543670	457914	421630	564100	626558	471389	619690	576053	647178	555251
676439581	hypothetical protein LOTGIDRAFT_200818 [Lottia gigantea]	24185.3	48906	53315.9	34283	75773.7	90137	45118.7	44851.9	84677.1	75184.6	83631.3	76241.9
74096057	protein transport protein Sec61 subunit gamma [Ciona intestinalis]	47499.1	51134.6	43215.3	59908.5	48495.7	45843.4	61609.3	76091	52238.2	86801.7	48290.9	46258.4
762147726	PREDICTED: uncharacterized protein LOC105349184 [Crassostrea gigas]	27559.5	31194	47378.8	16815.8	22249.1	30977.7	41836	25899.8	36621.5	29134.2	41019.7	46364
871264373	PREDICTED: collagen alpha-3(VI) chain-like isoform X9 [Aplysia californica]	984.624	1618.67	17788.2	15185.7	10283.2	12898.1	13320	11349.1	10275.5	13376.8	12005.3	13307.3
338522488	prohibitin [Octopus tankahkeei]	303968	493056	521505	275565	356328	419912	452157	460782	471526	604377	500810	479112
762161595	PREDICTED: choline transporter-like protein 2 isoform X3 [Crassostrea gigas]	62541.9	46474.1	37035.3	66717.1	60935.7	78352.3	71546.6	59821.8	87944.2	60157.7	72876.3	88483.1
157930910	glutaredoxin [Haliotis diversicolor supertexta]	343195	259455	225130	389237	395239	405315	314810	487709	438635	440427	328680	515033
P20241	NRG_DROME Neuroglian OS=Drosophila melanogaster GN=Nrg PE=1 SV=2	253688	368609	430755	106434	139587	279941	357991	207490	324200	324269	480722	281557
524864996	PREDICTED: betaine--homocysteine S-methyltransferase 1-like [Aplysia californica]	75613.4	151187	187736	138936	121057	130932	198094	138702	146780	194766	162970	166423
762094182	PREDICTED: inorganic pyrophosphatase-like isoform X2 [Crassostrea gigas]	353226	495197	532158	366398	332009	389050	470170	368289	630065	351623	745214	520170
762115898	PREDICTED: unconventional myosin-VI-like isoform X2 [Crassostrea gigas]	330403	265580	223311	434916	401950	276459	355254	382569	470158	418804	381496	405126
525546296	putative 40S ribosomal protein S29 [Dolomedes mizhoanus]	48689.4	32471.9	20428.7	39665.6	35191.7	47113.2	55497.8	55614.5	43212.5	41266.6	49001.8	34467.7
405952464	Spliceosome RNA helicase BAT1 [Crassostrea gigas]	426306	503696	431419	259315	244349	407407	533633	358539	455988	472609	559025	456622
Q5EAD6	RL15_BOVIN 60S ribosomal protein L15 OS=Bos taurus GN=RPL15 PE=2 SV=3	85117.3	178041	223992	108601	74678.7	109446	207663	79852.8	170546	139396	196775	178897
676495573	hypothetical protein LOTGIDRAFT_223337 [Lottia gigantea]	776283	1.05296e+06	1.33939e+06	393675	367183	828425	1.20938e+06	523725	1.02975e+06	846211	1.30698e+06	1.01686e+06
668464923	hypothetical protein ZHAS_00020488 [Anopheles sinensis]	111562	136656	148311	93094.6	87292.1	146739	177208	98765.4	168183	131159	186888	140100
116008297	mitochondrial H+ ATPase a subunit [Pinctada fucata]	1.84032e+07	1.86076e+07	2.0154e+07	1.35671e+07	1.18437e+07	1.93357e+07	2.05717e+07	2.01047e+07	2.4561e+07	2.06609e+07	2.10751e+07	2.00631e+07
675869574	hypothetical protein HELRODRAFT_185702 [Helobdella robusta]	905024	1.0007e+06	1.27564e+06	603061	617314	1.01277e+06	1.21577e+06	827151	1.24462e+06	978063	1.39797e+06	1.08521e+06
762125371	PREDICTED: protein disulfide-isomerase-like [Crassostrea gigas]	2.96087e+06	3.55134e+06	3.73445e+06	3.19516e+06	2.75906e+06	3.25124e+06	4.55916e+06	3.30421e+06	4.17169e+06	3.84068e+06	4.52584e+06	3.82192e+06
676483007	hypothetical protein LOTGIDRAFT_150831 [Lottia gigantea]	39902.4	55629.1	67437.8	49749.8	51138.9	76783.6	77429.8	62260.9	59540.1	63051.7	87544.7	74363.5
762091377	PREDICTED: dynamin-1-like protein [Crassostrea gigas]	151768	255641	305681	171546	168800	619954	392818	478762	182444	269835	228705	530444
762085542	PREDICTED: isocitrate dehydrogenase [NAD] subunit alpha, mitochondrial-like [Crassostrea gigas]	285631	392305	436032	309179	297159	470188	456495	385830	504012	383992	530875	464113
356892421	heat shock protein 90 [Octopus vulgaris]	3.26191e+06	3.95132e+06	4.53613e+06	2.49163e+06	2.62728e+06	3.41797e+06	4.68199e+06	3.39125e+06	4.29773e+06	3.95842e+06	4.8064e+06	4.10326e+06
762073486	PREDICTED: anamorsin homolog [Crassostrea gigas]	22978.6	21921.1	22155.3	2299.31	22453.5	28505.7	23437.2	22676.9	27796.1	25058.2	25703.8	24966.9
260818781	hypothetical protein BRAFLDRAFT_280591 [Branchiostoma floridae]	517264	567720	541517	524234	607702	549934	884488	760186	589838	571664	645983	659324
676445630	hypothetical protein LOTGIDRAFT_174238 [Lottia gigantea]	35239.2	45323.2	52399.3	23584.8	26080.1	46278.7	51905.9	36402.1	43075.4	45564.5	55988.3	51511.6
762100997	PREDICTED: 40S ribosomal protein S2 [Crassostrea gigas]	321734	348187	517783	228935	209693	292005	468235	258284	391873	399082	440430	423332
762162020	PREDICTED: LOW QUALITY PROTEIN: phosphoglycerate kinase 1-like [Crassostrea gigas]	2.56811e+06	2.98491e+06	3.18871e+06	1.81606e+06	2.31572e+06	3.05754e+06	3.06731e+06	3.24137e+06	3.51387e+06	2.87377e+06	3.461e+06	3.61057e+06
16596797	hemocyanin G-type [Enteroctopus dofleini]	8.24171e+06	1.40673e+07	1.82984e+07	1.52174e+06	2.1708e+06	6.85243e+06	1.40375e+07	3.37817e+06	9.16703e+06	7.96552e+06	1.74988e+07	1.14204e+07
321450742	hypothetical protein DAPPUDRAFT_300850 [Daphnia pulex]	358111	251596	341098	445221	471161	528661	437262	530746	540496	553838	475682	432082
762151252	PREDICTED: U1 small nuclear ribonucleoprotein 70 kDa-like isoform X1 [Crassostrea gigas]	43483.4	64902.6	68704	23601	25141.6	42815.8	55622.9	59189.6	52321.4	53758.4	70584.9	41554.8
156369482	predicted protein [Nematostella vectensis]	2171.93	16383.7	14929.9	8501.05	1212.67	13600.8	12510.7	6923.64	9345.85	12543.5	16879	12187
675387429	Transformer-2 protein-like protein beta, partial [Stegodyphus mimosarum]	13321.2	18093.4	16985.9	6091.37	6032.1	8051.8	13385.9	9211.8	13631.7	9740.67	26149.9	12848.5
676496965	hypothetical protein LOTGIDRAFT_223691 [Lottia gigantea]	4848.56	4069.34	6112.3	3199.39	1092.37	4002.42	6073.04	1636.92	5108.19	3406.44	7146.22	5497.7
735659633	vesicular integral membrane protein 36 kDa-like protein [Littorina littorea]	60881.8	56896	62961.2	38088.2	42102.2	59658.1	66085.6	53943	73235.3	64815.1	65184.5	73285.1
871229017	PREDICTED: dnaJ homolog subfamily A member 1-like [Aplysia californica]	482332	529831	636021	237420	266956	384681	596754	315744	542924	423961	693931	564391
676438600	hypothetical protein LOTGIDRAFT_149685 [Lottia gigantea]	46373.3	52373.6	94598.6	183130	67769.8	61932.7	87428.3	148336	95476.1	151132	40402.7	103034
676447952	hypothetical protein LOTGIDRAFT_208859 [Lottia gigantea]	271246	343386	443362	241835	213271	302739	433508	260837	348150	346193	474772	379833
157361601	60S ribosomal protein L32-like protein [Phlebotomus papatasi]	463330	693649	578458	410149	443770	587548	632425	770096	680777	768053	609779	463249
556592513	catalase [Octopus vulgaris]	87979.6	115100	168319	40487.7	71075.4	133754	166662	102399	98031	122827	167372	104211
676468482	hypothetical protein LOTGIDRAFT_122424 [Lottia gigantea]	123107	135556	180657	45871.9	79069.7	113362	147608	99351	150432	122833	168600	146974
669330280	hypothetical protein M514_00956 [Trichuris suis]	115481	154486	230336	28259.4	26421.3	149147	171000	41019	157517	98421.7	264968	134893
762091278	PREDICTED: calcium uniporter protein, mitochondrial-like [Crassostrea gigas]	123982	127182	125477	184565	155749	219954	180357	126350	210653	193416	196617	247268
676463353	hypothetical protein LOTGIDRAFT_216532 [Lottia gigantea]	30419.3	2807.4	31493.6	27796.5	22965.3	28443.8	29625.2	30980.4	28961.8	28910.6	31848.4	26959.6
657785194	PREDICTED: actin-related protein 2 [Cynoglossus semilaevis]	166265	143799	165263	106433	106881	166407	197118	142279	198991	111728	214169	188706
524908792	PREDICTED: uncharacterized protein LOC101850443 [Aplysia californica]	8601.72	46644.5	51150.9	47785.7	51507.8	63812.7	54065.2	79409.8	54614.7	42769.8	57630.2	43210.7
676447964	hypothetical protein LOTGIDRAFT_208867 [Lottia gigantea]	56814.3	70422.2	70928.5	89596.3	72252.9	84929.9	72245.6	90360.1	106533	113326	76251.4	88802.7
676433146	hypothetical protein LOTGIDRAFT_138283 [Lottia gigantea]	7113.15	12279.9	11049.8	13966.6	8287.93	15094.2	15058.1	15106	14004.4	8439.93	13399.8	17376.1
820947117	Eka-Phospholipase C 2 protein, partial [Euperipatoides kanangrensis]	106330	115853	138169	51202.4	83099.8	99926.2	132829	78224.8	119782	131302	143114	125886
827342572	uncharacterized protein LOC550326 precursor [Danio rerio]	2350.22	92992.7	91542	69461	65840.4	114439	111098	88888.1	107690	49111.1	103311	76451.2
261289805	hypothetical protein BRAFLDRAFT_268929 [Branchiostoma floridae]	269464	367058	408110	186297	162947	298874	376627	275492	334875	263273	404763	424504
646723477	Mitochondrial 2-oxoglutarate/malate carrier protein [Zootermopsis nevadensis]	560948	688675	751114	505980	449106	710842	768394	566826	741558	702755	838525	885718
524870841	PREDICTED: putative pre-mRNA-splicing factor ATP-dependent RNA helicase PRP1 [Aplysia californica]	4819.01	4567.92	13471.1	1562.21	5917.05	7382.51	13048.3	473.871	7868.17	7450.58	5826.23	11661.9
524900699	PREDICTED: uncharacterized protein ZK1073.1-like isoform X3 [Aplysia californica]	938697	1.09969e+06	1.16337e+06	690109	763269	1.12428e+06	1.35717e+06	1.02217e+06	1.23911e+06	1.032e+06	1.36035e+06	1.08575e+06
296434302	elongation factor 1-gamma [Saccoglossus kowalevskii]	1.60559e+06	2.30799e+06	2.89136e+06	1.14255e+06	1.02693e+06	1.78159e+06	2.69183e+06	1.14213e+06	2.26762e+06	2.03075e+06	2.67628e+06	2.39554e+06
755257709	heat shock protein 20 [Pinctada martensii]	191194	289763	233478	132215	212290	192188	261505	269813	244825	277758	260515	221382
676425888	hypothetical protein LOTGIDRAFT_230007 [Lottia gigantea]	195006	253861	195442	230138	179796	245538	250877	287803	268612	308023	240113	240054
762140887	PREDICTED: uncharacterized F-box/LRR-repeat protein C02F5.7-like isoform X1 [Crassostrea gigas]	70672.4	78530	98609.9	55544.1	44153.6	84632.8	99674.1	54360.6	89391.6	95602.6	109277	81850.6
405960626	Interleukin enhancer-binding factor 2-like protein [Crassostrea gigas]	102320	139077	167890	28353.6	34528.8	95180.4	128729	73822.6	123968	99425.2	154781	114916
871243849	PREDICTED: vacuolar protein sorting-associated protein 26B-like isoform X1 [Aplysia californica]	11759.1	17636.7	16666.5	15205.7	5166.59	13538	18436.4	11215	16057	8252.61	23319.8	20774.5
260804133	hypothetical protein BRAFLDRAFT_263946 [Branchiostoma floridae]	333965	330474	389512	315773	304951	420565	450721	395293	455748	375786	455533	435693
116282655	heat shock protein 70 [Pteria penguin]	1.23e+06	1.34554e+06	1.40623e+06	602551	850206	1.15414e+06	1.43825e+06	1.17639e+06	1.4338e+06	1.16359e+06	1.49791e+06	1.35532e+06
676452044	hypothetical protein LOTGIDRAFT_231803 [Lottia gigantea]	1.12562e+06	1.39058e+06	1.48283e+06	1.42734e+06	1.28825e+06	1.55399e+06	1.65781e+06	1.52828e+06	1.73173e+06	1.67206e+06	1.86254e+06	1.66915e+06
524885713	PREDICTED: Golgi reassembly-stacking protein 2-like [Aplysia californica]	31891.8	33200.5	41065.9	24445.4	27151.3	37695.6	41814	31709.4	46797.5	32687.8	45657.5	40420
126697336	Ras-related protein Rab-1A [Haliotis discus discus]	889981	926276	913196	696106	712374	1.09144e+06	993021	997741	1.19225e+06	1.02041e+06	1.16654e+06	1.02485e+06
871227847	PREDICTED: catenin alpha-2-like [Aplysia californica]	6690.16	3803.03	6152.5	11822.7	8539.28	11109	8695.18	15115.8	10759.6	10267.4	3431.27	10562.4
159146775	stanniocalcin [Haliotis diversicolor supertexta]	40374.9	31166.6	18919	24255.6	30441.8	15286.6	38359.5	20478.3	21241.1	73626.9	19888.4	22524
762156442	PREDICTED: protein transport protein Sec23A-like isoform X1 [Crassostrea gigas]	53592.9	42689.6	56811	27445.6	22546.2	40357.3	52930.7	34345.5	51555.9	49219.6	66023.7	43467.9
126697446	RAB protein [Haliotis discus discus]	21028	12584.7	32110.4	42150.5	33768.5	48444.3	39719.2	34065.3	48126	21492.3	36785.5	52092.4
232136	GNAO_LYMST RecName: Full=Guanine nucleotide-binding protein G(o) subunit alpha [Lymnaea stagnalis]	857413	1.09562e+06	1.0393e+06	762430	578248	1.06768e+06	1.24898e+06	755691	1.09e+06	1.12615e+06	1.36806e+06	1.00088e+06
762073747	PREDICTED: serine hydroxymethyltransferase, cytosolic-like [Crassostrea gigas]	176686	221264	319763	239339	138389	207023	282003	138992	316750	193985	381747	275485
675374314	putative N(4)-(beta-N-acetylglucosaminyl)-L-asparaginase, partial [Stegodyphus mimosarum]	15910.1	24806.7	20121.5	16370.5	22676.8	9776.57	20132.5	18868.2	22657.4	27380.1	29252.7	15488.1
556749643	PREDICTED: aspartate aminotransferase 1-like [Pantholops hodgsonii]	73692.4	139152	155500	126641	111577	85487.2	190668	48586.1	149867	127008	182049	144666
762099362	PREDICTED: syntenin-1-like [Crassostrea gigas]	127292	101902	82378.7	87779.6	80074.1	97471.2	117544	102688	128400	113184	116099	124488
524893405	PREDICTED: pyrroline-5-carboxylate reductase 1, mitochondrial-like [Aplysia californica]	352523	324872	309471	360844	331345	400876	365450	518108	424059	416523	350625	457603
676470518	hypothetical protein LOTGIDRAFT_191967 [Lottia gigantea]	194012	245236	260864	258294	229607	280571	329630	217725	283274	327974	306806	322150
601036462	beta-actin [Azumapecten farreri]	3.19382e+06	3.98499e+06	4.49608e+06	1.41127e+06	1.7903e+06	3.23474e+06	4.34656e+06	2.29381e+06	3.87177e+06	2.61661e+06	5.52894e+06	3.37432e+06
260825239	hypothetical protein BRAFLDRAFT_113994 [Branchiostoma floridae]	61358.9	66392.8	144226	127601	254895	161449	130415	294330	127236	187648	56353.6	196506
676440560	hypothetical protein LOTGIDRAFT_186614 [Lottia gigantea]	66900.3	68199.5	71161.7	63387.8	44273.1	79976.8	88908	55360.4	77555.3	90950.7	90316.4	76038.9
405950746	ATP-binding cassette sub-family E member 1 [Crassostrea gigas]	33251.8	36594.1	39419.4	21435.5	15014	28691.6	43741.8	20865.4	34384.2	35823.9	40183.7	37051.9
676493484	hypothetical protein LOTGIDRAFT_197664 [Lottia gigantea]	67778.3	78155.5	101807	59720.6	52265.5	82972.2	93211.3	66924.1	90771.6	88123.9	92707.3	106377
676425879	hypothetical protein LOTGIDRAFT_205978 [Lottia gigantea]	249921	315697	398824	210624	170153	315220	349482	268854	378883	245920	415761	359385
871274397	PREDICTED: titin-like [Aplysia californica]	14794.2	5079.15	10711.3	4844.27	3532.3	4393.95	12688.7	7944.21	4367.87	7068.01	8288.9	12334
762142883	PREDICTED: lysosomal alpha-mannosidase-like [Crassostrea gigas]	84532.7	119628	103414	94583.1	93479.5	97764.1	131678	95574.3	107331	105910	139430	141222
443720670	hypothetical protein CAPTEDRAFT_122025 [Capitella teleta]	33265.3	32536.3	44710.5	41451.5	42810.8	42968.8	54261.6	40384	44765.6	43756	53484.8	52245.5
676447877	hypothetical protein LOTGIDRAFT_104108 [Lottia gigantea]	150646	181226	216003	135047	146923	199657	225281	175247	239306	171383	242855	196501
676477974	hypothetical protein LOTGIDRAFT_126839, partial [Lottia gigantea]	59813.2	53983.8	96133	53635.2	72076.9	64787.7	118414	39719.2	92583.6	58391.7	88883.7	88356.2
524866304	PREDICTED: fumarylacetoacetate hydrolase domain-containing protein 2-like [Aplysia californica]	112940	117397	135287	75346.2	56377.7	134010	120166	109226	157964	105103	160989	112734
350536823	amino acid racemase [Aplysia californica]	11798	12197.1	15141.3	6956.89	10671.1	13994.9	13821.7	15498	16755.3	10556.9	13501.9	15734.5
325296897	ras-like GTP-binding protein RHO [Aplysia californica]	42027.8	59078.1	53164.7	2684.53	39929.7	54785.2	55067.9	49494	37398.9	69618.6	46140.4	47662
26000552	Na-dependent Cl/HCO3 exchanger [Doryteuthis pealeii]	214008	323132	345848	206052	215482	303364	376346	170645	345899	299196	427851	331069
524884884	PREDICTED: protein deglycase DJ-1-like [Aplysia californica]	1.28964e+06	1.03651e+06	1.4169e+06	716019	699934	1.46403e+06	1.03671e+06	921827	1.41669e+06	1.50343e+06	1.63721e+06	1.51937e+06
676487676	hypothetical protein LOTGIDRAFT_196232 [Lottia gigantea]	162357	187164	186751	208037	220151	206442	254744	203017	276187	286046	209443	191107
664646494	heat shock protein 70 [Sepiella maindroni]	1.8503e+06	2.11185e+06	2.45593e+06	719166	1.08197e+06	1.68481e+06	2.24278e+06	1.79071e+06	2.04669e+06	1.63966e+06	2.32702e+06	1.9642e+06
524907662	PREDICTED: thimet oligopeptidase-like isoform X1 [Aplysia californica]	169103	187950	232145	149139	133384	200851	248998	145047	228993	192589	258143	226956
676454255	hypothetical protein LOTGIDRAFT_188487 [Lottia gigantea]	32008.9	37398.6	35720.3	34859	28523.8	37934.2	46833.9	39372.4	39758.8	49426.5	39407.1	35498.2
524906990	PREDICTED: 60S ribosomal protein L10 [Aplysia californica]	296901	314429	474839	152432	129698	248848	406204	211036	364419	258289	414643	305866
676478222	hypothetical protein LOTGIDRAFT_193923 [Lottia gigantea]	245243	273282	370460	252834	228296	301204	379231	207237	377491	310379	420383	327237
688572296	PREDICTED: titin isoform X1 [Danio rerio]	24590	65173.1	106411	40127.5	20175.7	47215	70499	23890.4	74640.1	46190.1	89086.7	63079.9
524893769	PREDICTED: ES1 protein homolog, mitochondrial-like [Aplysia californica]	171447	184189	216101	171313	152422	202744	226460	212365	234272	150939	261798	242405
762075278	PREDICTED: 26S proteasome non-ATPase regulatory subunit 14 [Crassostrea gigas]	141820	176851	216496	116696	155113	187996	205289	163995	217762	188849	227817	199304
7416007	G protein alpha subunit s class [Octopus vulgaris]	138510	175779	133509	168692	135045	208131	193300	152173	195286	244749	199982	174077
597767352	PREDICTED: caspase-3 [Astyanax mexicanus]	27162.2	18226.9	16406.6	13044.7	28298	24140	24482.3	25434.6	29878.1	28939.7	23818.3	21198.7
443731829	hypothetical protein CAPTEDRAFT_177448 [Capitella teleta]	91848.3	101617	130140	81539	73947.1	106422	144512	94786.3	102768	103134	149082	112973
646692251	Prohibitin-2 [Zootermopsis nevadensis]	207324	250521	283760	183410	126190	217268	248920	216069	251320	293932	264429	257442
762121956	PREDICTED: eukaryotic peptide chain release factor GTP-binding subunit ERF3A-like isoform X2 [Crassostrea gigas]	182038	151853	180142	141645	138799	194422	203555	150843	233342	174265	257449	173867
762085904	PREDICTED: glycylpeptide N-tetradecanoyltransferase 2-like [Crassostrea gigas]	52697.2	60901.2	69977	43556	39732.8	43300.4	73597.8	45590.4	68082.1	54456.8	69899.4	62643.4
676428195	hypothetical protein LOTGIDRAFT_224100 [Lottia gigantea]	954774	981628	856952	825820	840182	982540	932276	1.27816e+06	1.19584e+06	1.06142e+06	1.00838e+06	1.08422e+06
762117152	PREDICTED: glutathione S-transferase theta-1-like [Crassostrea gigas]	256084	288194	262974	218947	270550	319122	355571	305825	340378	353055	299593	293195
28630253	ribosomal protein L5 [Branchiostoma lanceolatum]	1.26671e+06	1.6863e+06	1.79215e+06	841021	923418	1.18583e+06	1.88751e+06	1.21805e+06	1.55235e+06	1.60587e+06	1.58587e+06	1.41698e+06
241617515	NADH dehydrogenase, putative [Ixodes scapularis]	42854.5	125774	128231	118317	122983	168673	135269	189031	156924	111594	129340	128950
348512252	PREDICTED: cystatin-A1-like [Oreochromis niloticus]	35540.7	36852.4	28491.8	48736.5	45099.5	40349.4	40800.3	62857.7	44328.9	50962.4	43984	40037.6
762147323	PREDICTED: protein dpy-30 homolog [Crassostrea gigas]	1573.33	44073.3	41473.4	40982.3	55128.3	42582.2	35534.2	68266.3	44523.4	45364.9	33964.3	44070.4
676492769	hypothetical protein LOTGIDRAFT_236719 [Lottia gigantea]	19282.9	12061.1	6768.51	7844.91	8354.95	8613.8	17383.4	16329	12404	4777.86	16411.3	8366.12
676452100	extended synaptotagmin-like protein 2-like protein variant [Lottia gigantea]	337654	289093	365036	273735	269307	396151	393276	285362	418878	345105	430584	448566
212168971	S1 type peptidase [Octopus kaurna]	135234	224020	112754	90336.3	153243	157351	183288	152209	186150	149206	212742	165557
676473951	hypothetical protein LOTGIDRAFT_182822 [Lottia gigantea]	135522	147454	183575	115868	74403.3	130892	180478	123702	148939	132436	200637	160357
159741	omega-crystallin [Enteroctopus dofleini]	823448	774494	789943	972502	873599	1.14573e+06	966015	935297	1.23e+06	1.1403e+06	1.08546e+06	1.10346e+06
156383686	predicted protein [Nematostella vectensis]	32172.5	51090.4	55509.6	38500.8	45395.1	59088.2	72559.6	35372.7	54068.4	53368.2	73044.7	49884.6
601125143	heat shock protein 78 [Hyriopsis cumingii]	3.29919e+06	3.59598e+06	3.65061e+06	2.17764e+06	3.36123e+06	3.33578e+06	3.8081e+06	3.96295e+06	4.27312e+06	3.3992e+06	3.71899e+06	4.15238e+06
676440317	hypothetical protein LOTGIDRAFT_173410 [Lottia gigantea]	33011.1	42734.1	36081.3	43028.9	48755.2	54260.3	46729.5	44002.8	57256.4	49580.5	49734.1	62241.9
676451412	hypothetical protein LOTGIDRAFT_180616 [Lottia gigantea]	89330.4	73975.6	88588.4	82961.5	68500.5	87815	124015	66538.7	93598	98035	94025.7	113382
321458072	cytoplasmatic actin [Daphnia pulex]	812899	739602	752877	500642	499003	676899	927749	534737	1.03342e+06	835744	823577	621173
871231078	PREDICTED: synaptophysin-like isoform X3 [Aplysia californica]	310415	409265	381920	240736	263679	446706	494068	340451	350617	311982	532076	431929
762132082	PREDICTED: deoxyuridine 5'-triphosphate nucleotidohydrolase, mitochondrial-like [Crassostrea gigas]	272414	290060	305615	206140	237303	254619	310103	357716	297272	325554	262123	324742
762123744	PREDICTED: protein tyrosine phosphatase type IVA 2-like [Crassostrea gigas]	80771.4	83569	71303.3	88731.9	70141.4	94423.2	82739.2	105024	88267.4	153428	77834.3	78578.3
762124056	PREDICTED: dihydropyrimidinase-like isoform X6 [Crassostrea gigas]	1.48531e+06	2.02117e+06	2.60104e+06	684966	790744	1.49822e+06	2.15597e+06	894692	1.85419e+06	1.28867e+06	2.84671e+06	1.84124e+06
676447541	hypothetical protein LOTGIDRAFT_228225 [Lottia gigantea]	48149.9	55574.8	64117.2	52872.1	70893.2	68408.9	66587	58050.9	79613.6	83928.7	59628.7	83444.8
762108874	PREDICTED: fascin-like [Crassostrea gigas]	309937	367675	461198	110648	73016.4	287256	389391	162518	328268	296310	446021	305721
871270804	PREDICTED: aquaporin-5-like isoform X2 [Aplysia californica]	247326	328413	369667	240190	214942	439116	377505	223830	431270	338548	425575	405909
762135062	PREDICTED: 60S ribosomal protein L7-like [Crassostrea gigas]	1.26703e+06	1.47815e+06	1.74851e+06	847102	725526	1.11628e+06	1.69861e+06	972294	1.56831e+06	1.49932e+06	1.59443e+06	1.26577e+06
296837083	arginine kinase [Biomphalaria glabrata]	1.72765e+07	1.67267e+07	1.88874e+07	1.62058e+07	1.51244e+07	2.11869e+07	2.21606e+07	1.80558e+07	2.14624e+07	2.00933e+07	2.39688e+07	2.04031e+07
733882854	PREDICTED: 40S ribosomal protein S20 [Meleagris gallopavo]	331133	435255	516631	211141	205633	308760	454448	314503	420760	379347	473417	360312
762162842	PREDICTED: kelch-like protein 26 isoform X1 [Crassostrea gigas]	33149.8	42341.1	48614.1	16214.2	15034.7	35689.6	47178.9	8217.68	35984.4	34747	54693.8	47681.5
780096204	PREDICTED: choline O-acetyltransferase isoform X1 [Strongylocentrotus purpuratus]	16147.8	22593.5	29148.1	12556.6	5650.71	22383.2	26478.4	14490.6	21480	15957.3	29763	21557.4
390364621	PREDICTED: apoptosis-inducing factor 1, mitochondrial [Strongylocentrotus purpuratus]	193173	282615	307820	153751	165771	258211	289372	193978	329930	207159	373111	234066
676438348	hypothetical protein LOTGIDRAFT_200665 [Lottia gigantea]	23027.5	36723	32768.2	22968.2	26675.7	36681.2	39432.4	27261	38328.3	36060.4	33486.2	39195.3
405950693	V-type proton ATPase subunit E [Crassostrea gigas]	643797	645773	608395	580698	581442	743046	725818	855222	735514	762331	677771	785240
817064768	PREDICTED: cytochrome c oxidase subunit 7C, mitochondrial-like [Athalia rosae]	321961	225631	261712	343825	251417	123481	440156	510108	161968	202014	179004	331352
117067150	ribosomal protein S6 [Branchiostoma belcheri]	1.31969e+06	1.61598e+06	1.71206e+06	1.02759e+06	821747	1.15851e+06	1.76235e+06	1.09997e+06	1.58959e+06	1.65331e+06	1.63754e+06	1.39836e+06
676433521	hypothetical protein LOTGIDRAFT_199739 [Lottia gigantea]	115915	149481	183699	108165	66949.8	115136	169908	89671.8	156270	147150	181471	138104
871268941	PREDICTED: NADH dehydrogenase [ubiquinone] iron-sulfur protein 4, mitochondrial-like [Aplysia californica]	37697.5	27531.7	26474.8	16281.8	12980.8	28522.7	31253	25337.2	31240.7	28967.2	34686.8	26955.8
676459519	hypothetical protein LOTGIDRAFT_182098 [Lottia gigantea]	27651.7	88328.8	102785	41974.9	36729.9	55687.9	83363.8	49735.2	71680.4	75084.9	75406.9	66035.2
676467231	hypothetical protein LOTGIDRAFT_182444 [Lottia gigantea]	216309	187495	229419	168240	141283	162779	257583	134176	212689	194666	281977	237668
676430938	hypothetical protein LOTGIDRAFT_171636 [Lottia gigantea]	31554.5	34214.4	26966.8	28915.2	26064.4	41836.9	47438.1	27153.7	34083.3	50100.3	33632.1	33667.3
779996237	PREDICTED: scavenger receptor cysteine-rich protein type 12 isoform X1 [Strongylocentrotus purpuratus]	96437.2	82954	95162.8	108183	90727.5	133624	76911.2	86430.9	115740	216546	113562	114312
762124845	PREDICTED: rRNA 2'-O-methyltransferase fibrillarin-like isoform X1 [Crassostrea gigas]	199052	177682	187746	133467	122960	185487	186867	210847	212861	176804	211783	200009
B5X7X4	LTOR2_SALSA Ragulator complex protein LAMTOR2 OS=Salmo salar GN=lamtor2 PE=2 SV=1	40962.1	44935.2	40861.3	28054.4	26546.8	18116.1	41826.8	43963.8	32526.1	46215	29455	43667.7
Q9GZT3	SLIRP_HUMAN SRA stem-loop-interacting RNA-binding protein, mitochondrial OS=Homo sapiens GN=SLIRP PE=1 SV=1	121439	142087	134863	134633	141590	129402	134426	192445	169460	156889	140568	163531
817049153	plasma membrane calcium ATPase [Hyriopsis cumingii]	368115	697064	774542	385855	492882	570568	737231	423433	662827	566588	849043	675418
759046940	PREDICTED: V-type proton ATPase subunit C isoform X1 [Cerapachys biroi]	193458	317637	311917	232686	213052	290627	331871	260943	330008	230664	343107	359241
762137228	PREDICTED: methionine aminopeptidase 1-like [Crassostrea gigas]	5525.38	6121.08	7105.04	173.677	4533.12	6626.85	5391.97	3977.78	7482.45	3959.53	9616.02	5334.8
405958107	Poly [ADP-ribose] polymerase 1 [Crassostrea gigas]	191603	215478	263403	113395	72842.9	150159	228971	124035	198139	182476	273706	188949
762110889	PREDICTED: poly(A)-specific ribonuclease PARN-like isoform X1 [Crassostrea gigas]	97711.6	90612.1	108390	78852.8	86531.8	88889.2	117494	106341	105828	116168	100462	107637
676495767	hypothetical protein LOTGIDRAFT_223383 [Lottia gigantea]	1.78905e+06	1.74245e+06	1.55555e+06	1.54934e+06	1.27037e+06	1.59031e+06	2.03531e+06	1.74885e+06	1.8607e+06	2.18151e+06	1.83352e+06	1.60732e+06
632964075	PREDICTED: methylglutaconyl-CoA hydratase, mitochondrial [Callorhinchus milii]	131402	125839	117914	139891	125412	151401	148064	159179	165877	165354	144565	156366
762113492	PREDICTED: probable methylmalonate-semialdehyde dehydrogenase [acylating], mitochondrial [Crassostrea gigas]	1.24257e+06	1.54481e+06	1.68168e+06	1.15046e+06	1.1504e+06	1.33811e+06	1.65947e+06	1.24457e+06	1.7312e+06	1.38057e+06	1.94159e+06	1.66118e+06
762161535	PREDICTED: uncharacterized protein LOC105322152 [Crassostrea gigas]	64754.2	55676.8	59712.5	71157.7	85939.7	65283.4	47804.8	117892	75109.5	105726	46683.4	84255.7
762081987	PREDICTED: leucine-rich repeat-containing protein 47-like [Crassostrea gigas]	43596.1	43471.4	52617	45566.9	38237.9	58617	55410.2	51125.5	68150.9	57457.3	48879.6	53547.8
195433286	GK23721 [Drosophila willistoni]	184079	216301	242116	169367	145176	218677	277234	158052	247917	243051	275195	192164
524892331	PREDICTED: heat shock 70 kDa protein 4-like [Aplysia californica]	375148	402465	525153	306508	358506	397546	542948	267528	477540	380430	610468	524588
676442838	hypothetical protein LOTGIDRAFT_113559 [Lottia gigantea]	879790	1.08269e+06	1.45359e+06	606689	625830	919457	1.27256e+06	603484	1.16859e+06	948259	1.52135e+06	1.08367e+06
762122415	PREDICTED: sodium- and chloride-dependent neutral and basic amino acid transporter B(0+)-like isoform X1 [Crassostrea gigas]	59134.2	38545.9	31792.7	46035.3	55322.4	83639.4	39174.7	43596.1	62431.4	68558	80934.7	77785
260796497	hypothetical protein BRAFLDRAFT_120123 [Branchiostoma floridae]	3001.3	8852.4	4109.67	7883.73	11369	2692.44	9807.91	11726.1	6005.6	7037.82	6680.52	3621.82
871261399	PREDICTED: protein-glutamine gamma-glutamyltransferase K-like [Aplysia californica]	237372	313436	424876	256842	191813	323665	377380	99815.4	377599	303750	510109	400138
676440676	hypothetical protein LOTGIDRAFT_203638 [Lottia gigantea]	101645	117335	111171	90933.9	94711.5	133743	111186	140585	130059	138754	107787	140310
762123522	PREDICTED: dehydrogenase/reductase SDR family member 7-like [Crassostrea gigas]	21339.6	66176.6	54665.3	48020.3	31413	65957.2	56353.3	41522.7	62921.3	49981.7	79558.7	49979.1
676428717	hypothetical protein LOTGIDRAFT_212050 [Lottia gigantea]	242559	410880	423636	278279	361103	487745	443400	382002	467880	312130	517682	485311
676436139	hypothetical protein LOTGIDRAFT_238272 [Lottia gigantea]	195855	159506	170473	147410	199234	259524	194121	242557	237647	232231	211980	220498
762076444	PREDICTED: xylose isomerase-like [Crassostrea gigas]	302073	305008	343089	235955	220578	283842	366701	208664	342510	386718	358479	335749
524879941	PREDICTED: phosphatidate cytidylyltransferase, photoreceptor-specific-like [Aplysia californica]	46555.1	61076.1	45651.8	46269.6	43762.3	60738.2	44164.6	40876.2	73139	63370.5	92974.2	44450.8
195998435	expressed hypothetical protein [Trichoplax adhaerens]	548299	601082	244726	237063	281259	618735	473107	528391	569780	581134	420110	415432
762143255	PREDICTED: eukaryotic translation initiation factor 3 subunit E-like [Crassostrea gigas]	344550	381753	346541	392127	305538	341930	356501	535537	528655	408724	321699	341740
8778048	phospholipase C [Doryteuthis pealeii]	455356	886580	898456	597236	540006	806887	869765	591977	886029	850775	917961	820126
270013330	hypothetical protein TcasGA2_TC011920 [Tribolium castaneum]	18735.4	1581.03	20864.5	3114.46	8037.8	16938.5	13876.1	16470	3210.49	10093.5	16402	21626.3
762122103	PREDICTED: failed axon connections homolog [Crassostrea gigas]	61436.5	64525.6	40901.8	49884.4	47404.9	52116.2	70035.8	50242.2	70410.1	65352.7	60418.9	56068.1
762152009	PREDICTED: poly(U)-specific endoribonuclease-A-like [Crassostrea gigas]	29222.5	23224	28140.1	27095	1650.98	29997	25607.2	18749.8	34593.6	28437.8	26402.2	30312.8
551491947	PREDICTED: probable ATP-dependent RNA helicase DDX5-like [Xiphophorus maculatus]	304264	322140	391449	355173	273338	359986	420377	329254	421578	352235	469145	369148
676494423	hypothetical protein LOTGIDRAFT_108853 [Lottia gigantea]	258588	299788	244378	317118	266061	343509	375042	293256	350510	377551	338376	300942
255918312	ras family-like protein [Crassostrea angulata]	334836	364838	389319	258464	251199	370282	403987	365320	400215	388839	429316	329666
696959636	PREDICTED: low molecular weight phosphotyrosine protein phosphatase isoform X1 [Cuculus canorus]	10300.1	4116.65	25220.1	39066.9	34488.3	38660.8	30491.2	32185.8	42263.9	2159.16	40344.1	31276.4
675304823	UNVERIFIED: ribosomal protein L19, partial [Mytilus trossulus]	75491.4	101968	95684.6	85975.1	78746.9	85633.4	107985	92657.5	112876	117849	108594	75920.7
443710422	hypothetical protein CAPTEDRAFT_155064 [Capitella teleta]	262825	260496	276802	268299	204669	305711	328259	285135	306112	334195	297357	305843
675369490	Retinol dehydrogenase 12, partial [Stegodyphus mimosarum]	388021	503784	678498	389084	401883	462608	618019	432516	532586	545964	632369	559450
762146050	PREDICTED: di-N-acetylchitobiase-like [Crassostrea gigas]	159846	128441	82747.2	97906.9	93016.5	81535.4	158151	78320	162740	191226	60579.1	105472
762122623	PREDICTED: peptidyl-prolyl cis-trans isomerase-like [Crassostrea gigas]	82147.9	40092.9	72995.9	213578	171628	195181	101587	135741	227036	160639	95516.5	191260
701351600	PREDICTED: long-chain-fatty-acid--CoA ligase 1 isoform X1 [Tauraco erythrolophus]	368150	278033	376770	430435	448128	530165	465649	480953	482185	514932	384453	525939
573885879	PREDICTED: annexin A7-like isoform X2 [Lepisosteus oculatus]	789561	754658	674519	819626	624311	832668	878645	850302	704381	1.10072e+06	823860	917296
410910224	PREDICTED: dehydrogenase/reductase SDR family member 11-like [Takifugu rubripes]	262091	189826	200282	87163	130398	156417	247573	168790	188296	165841	225940	207705
871230060	PREDICTED: otopetrin-2-like [Aplysia californica]	54879.7	72792.4	105545	14742.2	24653.3	58138.3	68227.5	20236.1	61448	57574.8	105829	74522.3
405966435	Splicing factor, arginine/serine-rich 7 [Crassostrea gigas]	168737	199654	147106	82131.1	109343	129408	160970	199913	160620	154896	174486	129609
524878057	PREDICTED: 60S ribosomal protein L36 [Aplysia californica]	484497	500522	505636	282614	256773	340525	503197	411527	458791	499450	544984	358891
676436583	hypothetical protein LOTGIDRAFT_157475 [Lottia gigantea]	915540	1.32117e+06	1.7014e+06	652046	720065	1.08728e+06	1.40153e+06	644614	1.27184e+06	947838	1.87551e+06	1.35081e+06
676466775	hypothetical protein LOTGIDRAFT_191299, partial [Lottia gigantea]	36209	60561	40048.6	29737.3	72569.4	35210.5	58657	45918.7	60083.7	67852.8	38373.9	50300
524865616	PREDICTED: stomatin-like protein 2, mitochondrial [Aplysia californica]	490924	603926	579873	638943	536500	644936	661954	771039	660466	782525	543989	668610
762168720	PREDICTED: cytosolic purine 5'-nucleotidase-like isoform X4 [Crassostrea gigas]	25878.7	36842.1	44717.6	28302.8	19774.9	37419.9	41912.7	15375.5	48953.4	38960.2	57323.3	23146.9
524906932	PREDICTED: major vault protein [Aplysia californica]	507176	298819	403041	713347	628673	648807	618491	513442	710007	567877	610329	721486
850496369	macrophage migration inhibitory factor [Meretrix meretrix]	144910	128157	124585	114313	114912	157080	130740	145824	149539	133901	167040	189630
443725380	hypothetical protein CAPTEDRAFT_174451 [Capitella teleta]	52462.4	66976.2	71697.7	71421.3	63399.2	67883.2	77645	68402.9	75653.6	76753.5	74383.7	87577.9
51859635	ribosomal protein L7 [Doryteuthis pealeii]	205079	218481	254922	118185	90111.4	170278	262182	118009	235033	228050	242359	149746
675879758	hypothetical protein HELRODRAFT_186524 [Helobdella robusta]	2.36912e+06	3.11647e+06	4.31867e+06	813889	1.06069e+06	2.31964e+06	3.17973e+06	1.15065e+06	2.87413e+06	2.14617e+06	4.3032e+06	2.70319e+06
676449371	hypothetical protein LOTGIDRAFT_214298 [Lottia gigantea]	36414.9	52647.1	63209	22503.9	20299.7	49572.4	54198.8	19411.5	58162.6	40898.7	57070	56068.7
148234516	serine hydroxymethyltransferase 2 (mitochondrial) [Xenopus laevis]	64635.9	64427.9	68148	10071.4	70898	63608	75326.7	68052.4	69552.8	62688.8	62828.9	60828.6
405967210	Signal peptidase complex catalytic subunit SEC11A [Crassostrea gigas]	90561	144767	135241	113439	87278.9	126817	150021	136534	135645	119086	137365	136750
676496588	hypothetical protein LOTGIDRAFT_170380 [Lottia gigantea]	2.71597e+06	3.45827e+06	3.52482e+06	2.80903e+06	2.66846e+06	3.8071e+06	3.88823e+06	2.9805e+06	3.83535e+06	3.5736e+06	3.7793e+06	4.11345e+06
524869547	PREDICTED: clathrin heavy chain 1-like isoform X1 [Aplysia californica]	578211	664680	784773	564888	475508	695802	908938	380267	770779	658958	914852	759913
159146785	cytidine deaminase [Haliotis diversicolor supertexta]	33238.5	46404.7	43232.8	20567.4	23852.5	54128.4	53209.3	43528.5	41517.5	35554.3	48871.1	35752.1
762120196	PREDICTED: protein phosphatase 1B-like [Crassostrea gigas]	71992.4	90995.6	87608.7	46325	54302.3	94202	106887	52880.1	96606.7	57195.5	116077	90087.3
675891312	hypothetical protein HELRODRAFT_70715, partial [Helobdella robusta]	158169	153046	159628	166772	165879	245416	162752	234114	188872	201710	248646	187663
405972616	Methylcrotonoyl-CoA carboxylase subunit alpha, mitochondrial [Crassostrea gigas]	142108	160006	161881	170420	139774	155361	169946	199137	177515	157098	191056	189444
676452811	hypothetical protein LOTGIDRAFT_214616 [Lottia gigantea]	273149	279849	308319	358432	192581	331008	296012	282756	350017	361942	471011	271454
762132903	PREDICTED: uncharacterized protein LOC105343847 [Crassostrea gigas]	197408	219756	224361	211519	103749	196224	234652	181956	214089	177444	302885	233116
676484332	hypothetical protein LOTGIDRAFT_207139 [Lottia gigantea]	248425	338953	304963	313463	314364	366113	402753	336554	367319	406567	353951	331289
524885844	PREDICTED: 2-amino-3-ketobutyrate coenzyme A ligase, mitochondrial-like isoform X2 [Aplysia californica]	83559.2	92320.8	56068.1	156287	106326	130842	116823	122136	120316	141385	106102	121953
667256654	PREDICTED: phosphotriesterase-related protein isoform X1 [Galeopterus variegatus]	80647.7	110698	106057	29391.9	41905.9	81541.8	92414.9	70493.8	83834.1	78323.3	108540	91009.1
762112773	PREDICTED: bifunctional 3'-phosphoadenosine 5'-phosphosulfate synthase-like isoform X5 [Crassostrea gigas]	293299	344572	731939	187499	140286	552243	652280	143354	509130	324035	576540	414961
676443944	hypothetical protein LOTGIDRAFT_201479 [Lottia gigantea]	18568.4	27775.9	22227.8	16607	20236.6	27609.5	27342.7	20352.9	23269.1	32907.3	26816.3	24039
762152206	PREDICTED: transmembrane protein 115-like [Crassostrea gigas]	20646.3	54473.4	21531	48719.5	77493.2	35857.7	26859.5	66763.5	50941.2	60589.1	46940.5	48724.2
481054003	glutathione-S-transferase [Sepiella maindroni]	7.37512e+06	9.24227e+06	5.53275e+06	8.54399e+06	8.27997e+06	8.08891e+06	9.28342e+06	1.0707e+07	8.54428e+06	1.16622e+07	7.32709e+06	7.18028e+06
321474383	hypothetical protein DAPPUDRAFT_230545 [Daphnia pulex]	64050.1	77448.5	66084.4	61670.5	70863.6	37143.4	106926	101927	61322.1	40482.2	47808.3	80042.6
676435463	hypothetical protein LOTGIDRAFT_200091, partial [Lottia gigantea]	45841.5	35226	45557.3	40506.9	6470.1	44014.9	46830.5	35788.6	39751.1	41772.5	44565.5	44161
676491240	hypothetical protein LOTGIDRAFT_132853 [Lottia gigantea]	633588	808242	919127	434625	511655	650633	841032	593323	718727	717840	886387	840683
762078395	PREDICTED: proteasome subunit beta type-2-like [Crassostrea gigas]	466140	536087	503194	362132	439897	557934	518709	621255	537939	589137	527565	533110
762140986	PREDICTED: hexokinase-2-like isoform X4 [Crassostrea gigas]	8719.68	17374.5	23711	16923	15436.1	17617.6	25578.4	9828.79	18012.6	17843.5	22521.7	22026.3
762167061	PREDICTED: rhomboid-related protein 2-like [Crassostrea gigas]	3116.88	40475.7	42341.7	115950	90040.8	86382.3	65663.2	67613	73009.9	89316.4	60008	83468.2
158187776	ribosomal protein rpl23 [Arenicola marina]	449255	574924	572658	330435	362119	448317	577385	559191	511566	521568	548495	459115
677288681	Nucleoside diphosphate kinase, partial [Acanthisitta chloris]	4.16001e+06	4.77956e+06	5.09403e+06	2.70206e+06	3.10001e+06	4.31601e+06	4.87094e+06	4.2986e+06	4.72571e+06	4.0782e+06	5.03769e+06	5.0159e+06
762093361	PREDICTED: citron Rho-interacting kinase-like [Crassostrea gigas]	1275.7	620.179	6348.93	4087.37	1638.69	925.345	1936.83	3825.8	897.103	656.384	106.009	9862.28
801385847	PREDICTED: LOW QUALITY PROTEIN: uncharacterized protein LOC105619294 [Atta cephalotes]	11307.3	10092.9	15556.1	14506.5	12186.2	10614.9	17620.7	15446.6	5694.35	17814.1	12459.5	17114.9
524870221	PREDICTED: xaa-Pro dipeptidase-like [Aplysia californica]	520909	580204	558187	301462	512430	345251	653061	418801	533339	430440	670672	562653
524868787	PREDICTED: homogentisate 1,2-dioxygenase-like [Aplysia californica]	22892.2	17310.7	39498.5	5285.48	24483	18043.2	44691.7	19097.2	30667.9	2808.14	37686.2	12898.2
226374647	RNA transcript variant b adenosine deaminase [Doryteuthis opalescens]	170084	226767	292874	62776.6	63590.7	130495	237601	80425.1	176560	136854	286612	179043
459219298	60S ribosomal protein L12 [Cerebratulus lacteus]	608965	747946	921457	402734	418235	544722	848773	541965	718112	628875	782391	702956
524884588	PREDICTED: kelch domain-containing protein 2-like isoform X1 [Aplysia californica]	20752.7	26855.7	39657	18664	24086.6	23718.9	36254.2	23372	27226.2	26015	31115.4	34054.8
388571216	replication protein A3 [Ostrea edulis]	19630.8	26955.6	26837.9	13975.9	20956.6	21197.8	26646	21401	26806.3	23347.4	23935.6	27875.4
166952321	ribosomal protein rpl35a [Lineus viridis]	94775.1	28468	92109.2	48441.2	12913.2	18010	85297.1	23758.1	86228.5	33987.7	71009.9	40909
405972843	Obg-like ATPase 1 [Crassostrea gigas]	96845.3	119350	164550	132634	144644	157651	184419	128416	183462	110334	160662	176486
700589070	hypothetical protein [Phragmatopoma lapidosa]	7.59073e+06	9.00768e+06	8.54121e+06	6.14432e+06	6.71636e+06	1.0833e+07	8.19634e+06	1.01644e+07	9.93349e+06	9.16757e+06	9.07264e+06	9.91574e+06
762069964	PREDICTED: alpha-actinin, sarcomeric-like isoform X1 [Crassostrea gigas]	2.50108e+06	3.59628e+06	4.30694e+06	1.72147e+06	2.59303e+06	3.30356e+06	4.12826e+06	2.14538e+06	3.47396e+06	3.26645e+06	4.3692e+06	3.44274e+06
443683959	hypothetical protein CAPTEDRAFT_178077 [Capitella teleta]	58987.8	7412.88	6793.66	12871.9	8623.68	25290.4	24792.7	10937.4	28633.5	16743	37835.3	19644.5
Q91ZS8	RED1_MOUSE Double-stranded RNA-specific editase 1 OS=Mus musculus GN=Adarb1 PE=1 SV=1	347155	414545	526862	198937	281235	367869	514510	262313	476994	223514	536395	454184
380026916	PREDICTED: ceramide synthase 6 [Apis florea]	38793.2	40978.3	40581.7	44857.9	34391.7	45957.7	51786.5	40465.4	44108.1	56562.2	52047.3	38630.4
405967099	Phospholipase A2-like protein VP8 [Crassostrea gigas]	1647.78	21687.7	7565.08	55914.1	49727.3	42282.2	25131.3	50853.1	45857.9	28294.6	22029	34353.2
676471688	hypothetical protein LOTGIDRAFT_164500 [Lottia gigantea]	707647	607777	569618	567934	577523	687905	673064	829146	712337	717000	686616	675197
675858762	hypothetical protein HELRODRAFT_77115, partial [Helobdella robusta]	646265	736704	689616	516710	458147	612086	794528	656315	704940	800106	687438	581983
871224575	PREDICTED: calcium-binding mitochondrial carrier protein Aralar2 [Aplysia californica]	282933	338736	378264	272319	179978	388605	397958	250154	387691	346487	423214	319873
762094991	PREDICTED: putative aminopeptidase W07G4.4 [Crassostrea gigas]	380.716	4402.64	13858.9	453.918	4549.75	10766.9	16716	9863.76	574.585	11685	146.89	736.124
676455949	hypothetical protein LOTGIDRAFT_117396 [Lottia gigantea]	45392.2	50303.3	46900.5	51117.4	45934.6	56360.1	53608.2	57682.5	57779.6	50284.6	66920.2	55156.4
676435873	hypothetical protein LOTGIDRAFT_172557 [Lottia gigantea]	226985	395503	358221	430147	321026	379865	453696	405542	391506	450860	365765	367042
356984620	MnSOD, partial [Reishia clavigera]	718294	845416	785225	865323	743850	980959	918690	973003	1.00863e+06	1.00631e+06	834643	950834
762113502	PREDICTED: arpin-like [Crassostrea gigas]	75628.1	76413	70379.5	80038.7	13641.2	77626.9	75748.3	57536.5	81657.7	80947.3	77829.3	79966.4
762161734	PREDICTED: transcriptional activator protein Pur-beta-B-like isoform X6 [Crassostrea gigas]	38039.2	38508	37196.4	40142.6	18545.8	43706.4	51312.7	44781.7	35971.3	50152.7	32262.9	34545.5
762153784	PREDICTED: spliceosome RNA helicase DDX39B [Crassostrea gigas]	335404	401910	451131	270758	238991	357314	441409	287688	394120	356126	461987	426041
762118596	PREDICTED: guanylate kinase-like isoform X1 [Crassostrea gigas]	50353.8	60271.3	53915	51547.3	38325.4	76139.6	56836	50888.2	76369.9	74685.2	55802.6	66016.9
676452793	hypothetical protein LOTGIDRAFT_214609 [Lottia gigantea]	614656	907202	794534	650120	617717	917419	834786	886559	800493	966135	767709	926484
675369149	Eukaryotic initiation factor 4A-II, partial [Stegodyphus mimosarum]	1.14147e+06	1.24754e+06	1.52273e+06	1.10346e+06	1.00503e+06	1.17989e+06	1.5768e+06	1.15353e+06	1.40191e+06	1.34444e+06	1.40002e+06	1.40722e+06
524873783	PREDICTED: CD82 antigen-like [Aplysia californica]	213350	188291	208611	103519	106582	185785	209786	134100	193364	155735	271151	193247
Q19842	PCCA_CAEEL Propionyl-CoA carboxylase alpha chain, mitochondrial OS=Caenorhabditis elegans GN=pcca-1 PE=1 SV=1	201271	230875	280618	216906	254778	319746	272194	250877	318694	240616	326016	321858
762168107	PREDICTED: proteasome subunit beta type-7-like [Crassostrea gigas]	119100	161494	165467	66885	57275.6	90920.2	140920	87566.2	125878	124253	154480	127193
762109220	PREDICTED: transaldolase-like isoform X2 [Crassostrea gigas]	1.00972e+06	1.14394e+06	1.08027e+06	1.15445e+06	1.05589e+06	1.03705e+06	1.16873e+06	1.29148e+06	1.25784e+06	1.26842e+06	1.30062e+06	1.15897e+06
1845598	Rab3 [Doryteuthis pealeii]	854148	651278	523342	460006	333060	604820	642031	580990	674413	660071	824914	553213
405965410	40S ribosomal protein S15 [Crassostrea gigas]	160330	168152	167323	110554	110942	133816	168151	181883	156794	172778	149516	147848
336455288	cysteine proteases inhibitor [Haliotis discus hannai]	124582	255869	171129	173872	203044	233955	245953	288029	174466	195307	195842	234516
762138589	PREDICTED: signal recognition particle 54 kDa protein [Crassostrea gigas]	54028	32431.3	38897.3	13104.7	33564.4	56873.7	43073.2	33877.5	42082.9	34739.4	42101.5	66823
Q2KJ46	PSMD3_BOVIN 26S proteasome non-ATPase regulatory subunit 3 OS=Bos taurus GN=PSMD3 PE=2 SV=1	74566.7	96928.9	85626.9	85103.9	39853.6	69354.2	111418	67026.1	77705.3	100267	95006.5	65836.5
676458911	hypothetical protein LOTGIDRAFT_232526 [Lottia gigantea]	99484.5	121036	114669	55342.6	30177.7	98484.2	128099	80779.6	86634.6	58847.4	127617	112643
676480292	hypothetical protein LOTGIDRAFT_210455 [Lottia gigantea]	555326	415099	470308	625799	520644	578602	655455	798164	571250	531165	465843	601688
354496810	PREDICTED: cholinesterase [Cricetulus griseus]	4539.95	2241.64	1336.2	3109.54	4182.42	1700.13	2304.01	1722.73	4678.37	2312.63	5496.38	3069.13
260784632	hypothetical protein BRAFLDRAFT_96254 [Branchiostoma floridae]	1.12697e+06	1.46852e+06	1.67092e+06	1.04372e+06	970614	1.41709e+06	1.5518e+06	1.04818e+06	1.4823e+06	1.54172e+06	1.72517e+06	1.46069e+06
524881473	PREDICTED: 10 kDa heat shock protein, mitochondrial-like [Aplysia californica]	1.64587e+06	1.76827e+06	1.55473e+06	1.39538e+06	1.36787e+06	1.6819e+06	1.81471e+06	2.12632e+06	1.82065e+06	1.6814e+06	1.58704e+06	1.74208e+06
325297015	CaM kinase II delta [Aplysia californica]	233396	303683	297049	174862	174799	264971	255113	218791	290157	250105	343084	300151
524868994	PREDICTED: translocon-associated protein subunit alpha-like [Aplysia californica]	580072	345539	448502	422938	491542	523686	538557	568773	566010	506001	535882	502051
341874194	CBN-DLG-1 protein [Caenorhabditis brenneri]	139419	164061	135847	171209	153807	144812	151407	234110	143911	168810	147673	194047
676456374	hypothetical protein LOTGIDRAFT_160876 [Lottia gigantea]	90280.6	130857	122683	89406.5	72153	117138	111243	100942	124293	131466	123490	120490
762095005	PREDICTED: spermidine synthase-like [Crassostrea gigas]	164195	170944	208089	145857	131728	184365	223928	145784	188978	196614	199234	194978
762107263	PREDICTED: enolase-like isoform X2 [Crassostrea gigas]	5.49172e+06	7.35785e+06	9.20066e+06	3.3731e+06	3.73523e+06	6.3616e+06	7.71942e+06	5.01705e+06	6.81224e+06	5.56853e+06	8.83751e+06	6.63864e+06
443713402	hypothetical protein CAPTEDRAFT_174924 [Capitella teleta]	482691	500319	431178	462283	401308	547116	463652	653186	588992	524969	529782	467091
823327713	chitin binding beak protein 4 [Dosidicus gigas]	48171.7	50836.4	41318.9	35838.8	41572.9	44775.2	45301.1	70622	40846.1	38396.7	49678.2	55080.8
676432142	hypothetical protein LOTGIDRAFT_185787 [Lottia gigantea]	113471	160734	161722	122213	112489	177281	182921	137105	163410	126773	221364	136606
675862716	hypothetical protein HELRODRAFT_185540 [Helobdella robusta]	43120.6	33408.9	37999.4	46644.5	44100.3	52351.3	45906.7	43895.9	59737.3	50678.7	38511.2	55394.6
524877737	PREDICTED: carbonyl reductase [NADPH] 1-like [Aplysia californica]	23988.4	20379.6	29975.4	22726.5	19730.5	32115.1	20400.8	28961.1	27545.2	29123.5	33068	30882.5
762154676	PREDICTED: 26S proteasome non-ATPase regulatory subunit 2-like [Crassostrea gigas]	200154	303005	441912	194786	146528	218804	302690	162303	267067	283962	343622	358441
676486947	hypothetical protein LOTGIDRAFT_235900 [Lottia gigantea]	597572	745831	615673	682713	590266	915035	752495	835790	788049	767240	735849	848824
51701837	RL32_SPOFR RecName: Full=60S ribosomal protein L32 [Spodoptera frugiperda]	19047.6	66905.9	73601.3	65796.2	44921.8	63899.3	67301.6	65893.4	69011.7	59255.9	65248.5	54172.5
443693178	hypothetical protein CAPTEDRAFT_178575 [Capitella teleta]	619389	705511	762575	478128	446007	607478	748208	474805	666564	734421	803734	695394
762146111	PREDICTED: acyl-CoA dehydrogenase family member 9, mitochondrial-like [Crassostrea gigas]	67628.5	116085	103555	75596.3	86598.3	98252.3	128843	83489.6	121434	97078	101019	92081.4
762073295	PREDICTED: inosine-uridine preferring nucleoside hydrolase-like [Crassostrea gigas]	5793.42	3746.1	10889.9	1803	10387.5	8386.31	10071.7	8763.88	7641.97	6083.41	5808.78	8329.58
676457868	hypothetical protein LOTGIDRAFT_215487 [Lottia gigantea]	214103	346868	457978	214543	294752	379515	379066	210912	463151	243703	432991	440954
871267525	PREDICTED: alpha-N-acetylgalactosaminidase-like isoform X3 [Aplysia californica]	109320	119970	133914	132531	147129	167861	178730	136879	165957	80383.7	158053	201886
762169515	PREDICTED: dynamin-like 120 kDa protein, mitochondrial isoform X3 [Crassostrea gigas]	58725.4	52010.4	72479.9	32651.8	29640.1	60193.5	63815.2	44444.9	66792.5	47480.4	63361.9	61606
762096920	PREDICTED: putative aquaporin-10 [Crassostrea gigas]	177251	198907	231962	149650	106285	170081	225977	155364	183332	197678	209555	203111
676492363	hypothetical protein LOTGIDRAFT_236608 [Lottia gigantea]	73810.4	65935.4	91436.6	84401.3	54438.5	88009.9	104284	67357.9	62728	90692.6	95370.2	99893.8
195442422	GK17744 [Drosophila willistoni]	97235.5	144407	107799	121879	146608	167610	148402	153216	161551	125854	163142	139838
871236318	PREDICTED: transmembrane protein 214-B-like [Aplysia californica]	47969.4	64040.7	56306.6	58052.9	65625.1	53950.7	82748.8	50377.1	57982.9	73717.3	66005.6	61856.8
820140229	actin-related protein 2/3 complex subunit 3 [Scleropages formosus]	213231	209335	196593	231218	229950	281002	264029	256900	275541	277797	247515	223206
762124420	PREDICTED: UMP-CMP kinase-like [Crassostrea gigas]	237241	205504	166095	220948	303085	220234	222160	296316	264692	236984	234297	280402
Q3T906	GNPTA_HUMAN N-acetylglucosamine-1-phosphotransferase subunits alpha/beta OS=Homo sapiens GN=GNPTAB PE=1 SV=1	36168.8	35828.1	43568.6	14923.7	59446.2	56904.9	48545.9	49389.3	45763.1	45967.7	40482	49832.6
405957767	CDP-diacylglycerol--inositol 3-phosphatidyltransferase, partial [Crassostrea gigas]	184520	197415	219798	196999	166131	171330	237807	175561	202351	175546	268266	227115
524916658	PREDICTED: dolichyl-diphosphooligosaccharide--protein glycosyltransferase subunit DAD1-like [Aplysia californica]	683082	718042	644175	726725	457001	361674	927700	900673	420584	549346	520926	746455
212169021	S1 type peptidase [Hapalochlaena maculosa]	24181.5	59197.7	65581.7	41531.6	41427.1	39855	57644.7	61223.6	29088.1	48268.6	48914	62446.6
676431986	hypothetical protein LOTGIDRAFT_212487 [Lottia gigantea]	460715	487013	527731	362906	343408	421537	461154	539253	489288	434791	537556	479374
198419836	PREDICTED: epididymal secretory protein E1-like [Ciona intestinalis]	473728	356673	332157	351674	385779	421994	283152	611634	390606	382093	577820	378137
676487301	hypothetical protein LOTGIDRAFT_235960 [Lottia gigantea]	53605	27067.5	26916.4	40962.3	46777.3	56170	41613.5	104829	42405.8	44449	31206.8	19610.5
762169924	PREDICTED: uncharacterized protein LOC105325490 isoform X1 [Crassostrea gigas]	306000	338894	282443	376034	311667	267279	340090	261224	354823	361391	478556	328632
762149285	PREDICTED: fatty acid-binding protein, brain-like [Crassostrea gigas]	47194.5	57151.9	61291	33318.5	41779.5	67453.2	48481.6	50126.8	58745.5	65883.5	45395.9	79095
291228334	PREDICTED: pre-mRNA-processing factor 19 [Saccoglossus kowalevskii]	33763	27859.2	42483.9	7286.8	21187.3	4168.66	30486.6	13105.7	25880.5	18298.3	37973	28507
212169100	NP1 [Hapalochlaena maculosa]	85323	71633.4	64203.1	31578.1	37772.4	78304.8	72496.1	92186	78042	70054.1	48170.4	54577.2
443702038	hypothetical protein CAPTEDRAFT_220819 [Capitella teleta]	5307.57	5292.48	1232.23	491.995	1611.64	2464.69	2833.45	2026.19	854.378	3424.39	5222.59	4114.43
524873656	PREDICTED: ATP-dependent RNA helicase DDX1-like [Aplysia californica]	68321.4	76335.3	119390	39997.9	52493.6	63529.2	90115.9	47869.9	85632.2	62625.6	99357.4	87472.2
762126659	PREDICTED: regulator of microtubule dynamics protein 1-like [Crassostrea gigas]	23379.3	24598.8	18783.2	23781.7	29046.3	31841.7	30211	29835.8	32425.2	31293.1	20643.4	26104.3
676490885	hypothetical protein LOTGIDRAFT_132539 [Lottia gigantea]	24800.4	182141	170884	266056	232933	213721	172249	217361	220011	241485	158655	217982
762079709	PREDICTED: pyridoxal 5'-phosphate synthase subunit SNZERR-like [Crassostrea gigas]	20533.8	20462.3	23140.1	11859.8	22172.2	24352.2	33122.7	24901.5	19302.7	13611.9	22754.9	24220.3
676422860	hypothetical protein LOTGIDRAFT_208507 [Lottia gigantea]	1.54347e+06	1.8418e+06	1.48017e+06	1.3938e+06	1.34134e+06	1.74505e+06	1.58625e+06	1.89489e+06	1.76922e+06	1.74201e+06	1.88746e+06	1.63563e+06
762083217	PREDICTED: uncharacterized protein LOC105326092 isoform X2 [Crassostrea gigas]	49065.2	51285	46301.4	7711.44	29229.5	44824.4	50124.3	54845	44810.6	11865.3	46455.8	48790.5
871208595	PREDICTED: titin-like isoform X10 [Aplysia californica]	1.02781e+06	1.16874e+06	1.36073e+06	842569	813105	1.06991e+06	1.33584e+06	829154	1.23432e+06	842968	1.50775e+06	1.31455e+06
405972247	Chromodomain-helicase-DNA-binding protein Mi-2-like protein [Crassostrea gigas]	58162.5	64757	67472.1	59573.6	45736.5	47092.8	77642.1	63323.7	60511.3	62626.8	66301.8	54965.9
762108179	PREDICTED: polypyrimidine tract-binding protein 1-like isoform X7 [Crassostrea gigas]	784050	884274	899762	770641	827996	935948	884731	1.05809e+06	983885	886194	917734	1.00565e+06
676432192	hypothetical protein LOTGIDRAFT_230465 [Lottia gigantea]	252139	225819	265600	184133	242366	244068	275658	213175	272362	262429	291662	273816
676480592	hypothetical protein LOTGIDRAFT_210543 [Lottia gigantea]	29090.4	43020.4	41027.8	37061.6	34048.8	33397.5	43628.1	43105.3	47257.8	49959.6	12428	48159.5
676474093	hypothetical protein LOTGIDRAFT_106026 [Lottia gigantea]	64444.7	47453.5	54071.7	57129.9	35338	26656	79895.1	59180.2	39261.9	43789.5	36576.6	61599.4
526117373	neuronal acetylcholine receptor subunit alpha-9-like precursor [Aplysia californica]	66904.6	78278.2	74698.6	39300.2	25930.4	59300.9	72917.6	50434.8	74811.9	54254.3	81655.9	52794.7
471362254	PREDICTED: dnaJ homolog subfamily A member 2 [Trichechus manatus latirostris]	130814	157388	159637	106908	118819	127078	153965	135504	154938	148203	164203	142400
166952311	ribosomal protein rpl27 [Lineus viridis]	22605.3	29886.8	38982.7	20545.1	17270.4	25860.4	34363.6	22989.8	27725.3	24456.1	35100	29553.5
675386024	60S ribosomal protein L3, partial [Stegodyphus mimosarum]	472957	359686	534663	213817	153179	246476	426584	251077	372508	281478	524951	366565
336309249	peroxiredoxin 6 protein [Sepiella maindroni]	2.407e+06	2.38942e+06	2.33076e+06	2.38532e+06	2.21188e+06	2.36461e+06	2.84317e+06	2.21566e+06	2.69012e+06	2.5962e+06	2.91147e+06	2.55509e+06
2879845	putative N-ethylmaleimide sensitive fusion protein [Doryteuthis pealeii]	315076	369756	376067	359244	248980	385503	396660	289816	380806	402835	427576	407083
676438171	hypothetical protein LOTGIDRAFT_200623 [Lottia gigantea]	283499	297501	308756	315663	239531	327895	371952	299877	317543	365885	301882	331260
Q6PAK3	ANM8_MOUSE Protein arginine N-methyltransferase 8 OS=Mus musculus GN=Prmt8 PE=1 SV=2	223198	428713	587756	302857	236046	297494	464655	263963	408399	378309	451426	360915
405971352	Disks large-like protein 1 [Crassostrea gigas]	323831	73903.8	64348.5	287866	270707	88297.3	327837	98293.7	110947	315356	80266.4	309892
568256922	thymidylate kinase [Anopheles darlingi]	18845.2	9850.48	12225.4	5310.11	6555.65	1159.86	15480.8	12367.8	12167.9	5183.31	11096.1	4112.86
676491752	hypothetical protein LOTGIDRAFT_204770 [Lottia gigantea]	233727	204274	245955	250365	285719	282961	267551	261731	285518	273737	263882	329642
405969358	ATPase family AAA domain-containing protein 2B [Crassostrea gigas]	12644.9	20890.7	30771.1	4929.73	11480.2	21123.4	23956.2	8427.1	27223.2	5545.88	25604.6	23213.4
126697380	ATP synthase, H+ transporting, mitochondrial F1 complex, o subunit [Haliotis discus discus]	389832	833162	693674	959287	936419	1.07089e+06	762257	1.24436e+06	896443	1.02418e+06	714716	822552
638248353	TRK-fused [Callorhinchus milii]	11984.6	21012.1	22873.8	20528.5	13656.6	23333.1	28147.5	7795.02	23816.9	8433.08	29001.9	29613.5
762156070	PREDICTED: charged multivesicular body protein 2a-like [Crassostrea gigas]	56098.1	39141.9	36234.4	13817	38538.8	29401.4	26373.4	63370	38744	43491.6	28179	38109.7
871278040	PREDICTED: NAD(P) transhydrogenase, mitochondrial-like [Aplysia californica]	2.37603e+06	2.16497e+06	2.28071e+06	1.66179e+06	1.88799e+06	1.80557e+06	2.26245e+06	2.47721e+06	2.2851e+06	2.17383e+06	2.32827e+06	2.07912e+06
762099955	PREDICTED: importin subunit alpha-4-like [Crassostrea gigas]	4293.6	2566.58	28387.8	15916.5	19798.5	20888.2	20959.5	11880	10354.8	17451.8	16822.3	25158.4
675885622	hypothetical protein HELRODRAFT_180780 [Helobdella robusta]	8390.53	18897.4	10806.9	34787.5	13323.4	16669.9	8516.41	22816	32756.3	31597.3	6995.24	12253.3
405976588	Serine/threonine-protein kinase PAK 1 [Crassostrea gigas]	179632	116905	114467	284275	200610	206984	172538	200268	222551	251931	170319	214314
762163192	PREDICTED: transmembrane emp24 domain-containing protein 7-like isoform X3 [Crassostrea gigas]	94097.8	116928	125039	123040	131760	132108	138012	134938	141447	115163	141965	135860
762114164	PREDICTED: calpain-B-like isoform X4 [Crassostrea gigas]	206954	143234	168822	181883	182575	237681	178266	207443	223708	209684	196683	235958
676472173	hypothetical protein LOTGIDRAFT_218395 [Lottia gigantea]	64896.5	73631.5	120923	59781.3	50257.8	81376.4	101427	68345.3	98293.1	56013.9	104901	74392.2
676476742	hypothetical protein LOTGIDRAFT_179098 [Lottia gigantea]	50946.9	54723	62405.3	56298.6	31928.4	55112	52193.7	62589.6	75088.7	53113	56585.1	48056.8
291242935	PREDICTED: epididymal secretory protein E1-like [Saccoglossus kowalevskii]	1.90295e+06	1.49569e+06	1.1103e+06	2.0849e+06	2.07976e+06	1.75284e+06	1.84054e+06	2.47378e+06	1.98349e+06	2.09482e+06	1.36835e+06	1.87078e+06
871233428	PREDICTED: uncharacterized protein LOC101860495 [Aplysia californica]	964583	978201	1.09607e+06	702987	716646	927569	993708	1.01504e+06	1.0309e+06	920480	996612	1.05024e+06
P42577	FRIS_LYMST Soma ferritin OS=Lymnaea stagnalis PE=2 SV=2	321012	379780	283277	572985	527661	525286	405052	539846	485101	556209	353488	570776
524881469	PREDICTED: glutaredoxin-3 [Aplysia californica]	327378	306671	309872	334988	329277	312658	386313	328319	358657	369273	299581	399129
676432238	hypothetical protein LOTGIDRAFT_212557 [Lottia gigantea]	72978.6	78631.4	95163.1	83017.9	95243.2	93221.3	87280.1	98320.4	100004	88828	90148.5	113138
51327354	Cyc1 protein [Danio rerio]	208823	386898	304290	316766	275707	348004	356177	350641	328175	383757	335227	296998
762170314	PREDICTED: Williams-Beuren syndrome chromosomal region 27 protein-like isoform X2 [Crassostrea gigas]	48202.9	40871.8	46309.8	101656	103433	104829	60941.4	81212.1	114253	75301.6	67752.5	96408.2
676488758	hypothetical protein LOTGIDRAFT_222012 [Lottia gigantea]	639686	677873	583135	549704	483119	690535	775873	554021	675796	741729	706774	580857
Q9Z2W0	DNPEP_MOUSE Aspartyl aminopeptidase OS=Mus musculus GN=Dnpep PE=1 SV=2	422466	506026	798112	286628	272655	402272	670818	268829	445274	390680	606268	610502
524900338	PREDICTED: ruvB-like 1 [Aplysia californica]	106321	120102	146681	69445.2	53776.7	106051	112227	110769	115668	105332	109094	117449
762131200	PREDICTED: ras-related protein Rab-21-like [Crassostrea gigas]	54409.9	48934.6	39067.1	38295.1	32544.8	52658.7	55799.7	36464.2	52855.5	42902.1	62613.1	45338
676449485	hypothetical protein LOTGIDRAFT_231639 [Lottia gigantea]	113440	127996	166018	81759.2	73804.7	107073	122680	102295	119599	121818	161854	117593
676446965	hypothetical protein LOTGIDRAFT_174413 [Lottia gigantea]	8797.69	6555.11	6054.56	13340.5	3681.52	9418.37	1682.25	6759.02	12850.2	15778.2	10044.8	6134.72
676480835	hypothetical protein LOTGIDRAFT_183679 [Lottia gigantea]	325290	291654	366938	286473	249268	326237	416090	206594	360416	297040	400753	370598
755970531	PREDICTED: eukaryotic translation initiation factor 4H-like, partial [Fopius arisanus]	316716	313522	284352	379995	464408	430451	294567	588113	403392	397759	299791	449461
524868093	PREDICTED: cytosolic 10-formyltetrahydrofolate dehydrogenase-like [Aplysia californica]	699377	512811	662616	251178	368996	480510	592178	415786	571552	431879	682240	610283
524899912	PREDICTED: synaptogyrin-2-like [Aplysia californica]	42177.6	38509.9	35271.4	31014	32639	45516.3	46455.8	40033.5	43509.1	36776.8	43524	39607.5
762111198	PREDICTED: 40S ribosomal protein S3 [Crassostrea gigas]	1.86419e+06	2.43488e+06	2.62499e+06	1.3744e+06	1.47255e+06	1.70901e+06	2.50945e+06	1.67172e+06	2.05482e+06	2.15065e+06	2.30582e+06	2.04936e+06
762087570	PREDICTED: methionine--tRNA ligase, cytoplasmic-like [Crassostrea gigas]	17825.2	28656.9	60445.9	18228.7	27216.8	27182.1	31356.5	12184.3	34568.3	32081.4	52085.8	36865.9
761902189	PREDICTED: transmembrane protein 254-like [Amphimedon queenslandica]	8721.04	1469.81	415.197	14207.1	3293.98	12418.6	6459.27	4563.19	10073.8	9540.34	5916.55	8384.03
169930288	G alpha q subunit [Euprymna scolopes]	1.82614e+06	2.2023e+06	1.92203e+06	1.94649e+06	1.4887e+06	2.3699e+06	2.29775e+06	1.94679e+06	2.15989e+06	2.57425e+06	2.19327e+06	1.84936e+06
871205332	PREDICTED: 5'-3' exoribonuclease 2-like [Aplysia californica]	157484	139186	164733	114226	67154.6	137674	144855	77793.2	168514	134307	174408	164320
762131237	PREDICTED: NEDD8-conjugating enzyme Ubc12 [Crassostrea gigas]	44859.5	55213.2	65166.1	34612.7	29134.9	48123.1	70671.4	31524	53482.1	22852.3	69509.8	58630.1
406055040	calreticulin [Hyriopsis cumingii]	4.29478e+06	4.72123e+06	4.77291e+06	4.45844e+06	5.53169e+06	5.05965e+06	5.04509e+06	5.33612e+06	5.75697e+06	4.97272e+06	5.30217e+06	5.48156e+06
676483840	hypothetical protein LOTGIDRAFT_235549 [Lottia gigantea]	1.69129e+06	1.4914e+06	1.20877e+06	1.44712e+06	1.87898e+06	1.63867e+06	1.52387e+06	2.07172e+06	1.76107e+06	1.65608e+06	1.56422e+06	1.76624e+06
676494960	hypothetical protein LOTGIDRAFT_169864 [Lottia gigantea]	65271.5	54889.1	37899.1	91858.5	65495	85027.7	61783	64288.8	86041.5	100832	38828.7	90845.3
405963576	FACT complex subunit SSRP1 [Crassostrea gigas]	29418.5	28748.9	35000.9	1720.63	38179.8	15499.3	35425.3	14770.7	28715.3	29140.9	30217.2	25908.4
524902961	PREDICTED: transportin-1-like [Aplysia californica]	18390	86861.3	78763.4	82195.5	98634.7	83393.8	84544	79676.5	81719.3	100975	74608.7	73794.9
817223194	PREDICTED: ATP synthase subunit O, mitochondrial [Orussus abietinus]	2.43345e+06	3.45326e+06	2.67187e+06	3.31374e+06	3.33598e+06	3.76774e+06	3.30495e+06	4.18772e+06	3.47399e+06	3.77768e+06	2.92934e+06	3.28726e+06
762144051	PREDICTED: signal recognition particle subunit SRP68-like [Crassostrea gigas]	54019.2	65321	62003.3	41715.5	90851.3	75084.1	68077.9	64498.4	64411.6	84653.6	70442.2	77341.8
557023070	PREDICTED: diamine acetyltransferase 1 isoform X1 [Latimeria chalumnae]	176691	168642	214518	113948	202057	163118	208214	176619	178381	172491	220951	189942
871208904	PREDICTED: kinesin heavy chain 1 isoform X3 [Aplysia californica]	363587	448458	579222	264506	233055	375506	468875	260133	399241	407496	533288	429729
524877616	PREDICTED: septin-7-like isoform X7 [Aplysia californica]	482762	493084	634910	234027	262749	439090	547208	287460	445467	447789	647428	431927
831549246	PREDICTED: ribose-5-phosphate isomerase [Fundulus heteroclitus]	169316	253697	247384	182392	156001	200442	299020	155093	217555	217753	193209	249726
762099171	PREDICTED: methionine adenosyltransferase 2 subunit beta-like [Crassostrea gigas]	79459.2	71473.1	70117.1	77408.4	66823.4	89815.2	96034.1	66626.4	95764.6	97710	57184.5	88061
749405505	Bcl-2 protein [Azumapecten farreri]	18875.3	12801.7	14267	13750.5	7687.91	17117.7	14628.4	12812.1	15534.4	19533.4	16389.1	14193.4
762106921	PREDICTED: coatomer subunit delta-like isoform X1 [Crassostrea gigas]	579993	535645	566842	472950	413980	516134	570335	553245	560977	584965	530131	599357
762134943	PREDICTED: probable voltage-gated potassium channel subunit beta [Crassostrea gigas]	45123	34116.8	33761.5	31609.7	39084.3	45877.3	61075.8	21495.7	45013	29931.6	59062.2	36273.4
513137512	argininosuccinate synthetase [Protopterus annectens]	1.56349e+06	1.93627e+06	2.08687e+06	1.59996e+06	1.51613e+06	1.90383e+06	1.89715e+06	1.46105e+06	2.02294e+06	2.12687e+06	2.0259e+06	2.13943e+06
762149954	PREDICTED: electron transfer flavoprotein subunit beta-like [Crassostrea gigas]	2.05922e+06	1.96952e+06	1.56277e+06	2.21508e+06	2.25962e+06	1.99162e+06	2.02864e+06	2.83807e+06	2.35006e+06	2.53413e+06	1.42564e+06	2.08463e+06
332374164	unknown [Dendroctonus ponderosae]	85696.7	140733	127481	69308.4	90431.4	25014.4	105242	115443	70331.2	100724	123174	77118.1
524882484	PREDICTED: pyruvate dehydrogenase E1 component subunit beta, mitochondrial-like [Aplysia californica]	1.30265e+06	1.16366e+06	1.24924e+06	1.14424e+06	1.06941e+06	1.55305e+06	1.45434e+06	1.10532e+06	1.59496e+06	1.28309e+06	1.35407e+06	1.43009e+06
327278709	PREDICTED: eukaryotic translation initiation factor 5 [Anolis carolinensis]	50412	80303.1	264201	174790	379744	152966	73525.9	196992	149304	337034	226397	228051
405968026	Sodium/calcium exchanger 3 [Crassostrea gigas]	309591	179466	226918	315869	260192	267448	251069	191892	321283	320323	283563	345332
762154837	PREDICTED: protein RCC2-like [Crassostrea gigas]	17787.6	17548	64157.3	33866.3	19152.2	40961.1	51689.6	9081.38	21242	21410.3	78860.9	30187.7
59895928	ribosomal protein L28 [Haliotis asinina]	48867.7	38591.6	44087.2	23573.1	27428.8	26461.6	41087.5	30539.2	40153.4	38356.3	45675.7	33650.5
762080647	PREDICTED: IgGFc-binding protein-like isoform X1 [Crassostrea gigas]	28482.9	4373.28	4526.68	22262.1	14501.9	54496.9	20025	14052.2	38798.2	20190	12329.9	35727.6
133893	RS26_OCTVU RecName: Full=40S ribosomal protein S26 [Octopus vulgaris]	599441	491255	621007	368773	331263	410143	530881	479158	531831	598359	522705	432307
762167109	PREDICTED: methylmalonyl-CoA epimerase, mitochondrial-like [Crassostrea gigas]	71447.1	67370.6	71035.5	68230.5	73766.5	92070.3	84711.7	86198	83469.8	91480	67261.4	73429.2
198419836	PREDICTED: epididymal secretory protein E1-like [Ciona intestinalis]	185872	164977	177968	183164	216287	252305	186864	213222	216861	199993	222850	253765
676481396	hypothetical protein LOTGIDRAFT_235163 [Lottia gigantea]	19660.8	42651.5	45803.1	30366.2	32050.3	40987.9	42874.9	17647.6	46353.8	43833.3	47012.9	34014.3
443719698	hypothetical protein CAPTEDRAFT_178290 [Capitella teleta]	132421	23533.5	54872.5	72268.1	95193.2	107872	55998.4	128659	85603.7	111114	68768.9	82099.7
530651417	PREDICTED: glutathione S-transferase kappa 1 isoform X2 [Chrysemys picta bellii]	18510.8	25755.1	17534.1	28802.7	33486.1	28415	25593.6	29006.7	32376.7	31443.5	15910.7	32573.9
676420722	hypothetical protein LOTGIDRAFT_102562 [Lottia gigantea]	1.11432e+06	1.08717e+06	1.48535e+06	548578	530108	1.16276e+06	1.16407e+06	670506	1.16953e+06	963841	1.3981e+06	1.12189e+06
676467033	hypothetical protein LOTGIDRAFT_191399 [Lottia gigantea]	64291.8	79858.2	80574	52711.1	63732	63533.5	75322.5	58754.2	63991.8	66542.1	86130.1	91871.4
76573377	60S ribosomal protein L13A [Mytilus edulis]	287821	419055	463593	279900	228936	334979	431367	319151	388667	390375	360863	312475
742237110	PREDICTED: COMM domain-containing protein 9 [Bison bison bison]	24452.7	21875.8	24276	21142.7	23278.3	24766.6	24565.1	29896.3	23941.7	31599.7	19420.8	23403.3
443734856	hypothetical protein CAPTEDRAFT_6646 [Capitella teleta]	97516.8	141108	142070	116680	100375	123421	151333	100082	123361	111639	160514	141465
675879928	hypothetical protein HELRODRAFT_189182, partial [Helobdella robusta]	629148	718190	648670	516018	673084	784803	670382	837680	731560	607491	808760	682384
762164672	PREDICTED: lipase maturation factor 2-like isoform X1 [Crassostrea gigas]	47582.9	76850.9	82108.1	61460.1	31636.1	57796.1	84851.1	30453.8	60169.2	63192.6	89651	62242.6
762145373	PREDICTED: multiple PDZ domain protein-like isoform X3 [Crassostrea gigas]	11920.3	10692.8	9225	24919.3	8183.13	11689	20842.4	7504.82	13650.9	13515.6	12847.2	15369.5
871270990	PREDICTED: adenylyl cyclase-associated protein 2-like, partial [Aplysia californica]	831270	1.4173e+06	1.44176e+06	1.44402e+06	1.31567e+06	1.73313e+06	1.49193e+06	1.36025e+06	1.49261e+06	1.54258e+06	1.37355e+06	1.67812e+06
762153999	PREDICTED: poly(ADP-ribose) polymerase pme-5-like isoform X1 [Crassostrea gigas]	128324	148157	124729	96113.7	43528.8	93908	130842	61323.7	150922	95305.7	160532	93811.9
762082265	PREDICTED: ras-related protein Rab-32-like isoform X1 [Crassostrea gigas]	176015	257542	193261	302667	245080	302880	268934	224776	300336	315890	259129	242140
260781042	hypothetical protein BRAFLDRAFT_274539 [Branchiostoma floridae]	35879.6	45467.6	30702.2	48625.2	44967.5	55595.2	39903	63535	47648.3	56658.9	36592.9	40494.9
675384101	Cytochrome b-c1 complex subunit 9, partial [Stegodyphus mimosarum]	285450	285384	286855	369796	242977	197240	379302	509529	199239	216615	172228	341387
871230226	PREDICTED: ELAV 2-like protein isoform X2 [Aplysia californica]	295136	408242	419499	390136	446794	474731	428304	500753	446844	407186	438019	433121
762162202	PREDICTED: methyltransferase-like protein 7B [Crassostrea gigas]	125630	137907	274942	104491	122886	179085	178853	162435	166436	166203	184731	171200
Q9WUM4	COR1C_MOUSE Coronin-1C OS=Mus musculus GN=Coro1c PE=1 SV=2	417525	542453	603610	272675	328477	350224	472650	336346	415160	478549	539779	496753
871270780	PREDICTED: uncharacterized protein LOC101850683 [Aplysia californica]	406548	541035	521879	232243	156954	373893	499482	347634	369673	352235	466952	394200
291221383	PREDICTED: dynein light chain Tctex-type 1-like [Saccoglossus kowalevskii]	30947.5	11452.3	42242.1	31842.8	30555.8	42386.5	36475	10467.2	38653.1	39777.4	37190.7	43469
762142629	PREDICTED: protein TEX261-like [Crassostrea gigas]	30993.9	27075.4	29380.8	26543.9	17364.3	22897.9	34630.9	31014.4	21448.1	28832.9	21221	30631.1
405973684	Calcium-regulated heat stable protein 1 [Crassostrea gigas]	88531.1	93622.4	79778.3	91809.2	88446.3	74395.7	71992.5	123367	86437	85244.9	119412	74525.4
827883561	S-crystallin 6 [Idiosepius paradoxus]	201378	148432	120542	149177	235158	238394	162740	228879	232964	266892	74022.9	220738
831502532	PREDICTED: 28S ribosomal protein S26, mitochondrial [Fundulus heteroclitus]	4417.03	7511.7	19751.5	25061.9	32263.9	1794.93	15293.2	33211.1	14548.5	19999	11245.3	4234.15
524915771	PREDICTED: uncharacterized protein LOC101860468 [Aplysia californica]	251625	330308	308042	328532	234296	304102	322435	291111	331275	344702	314262	302553
443699632	hypothetical protein CAPTEDRAFT_179200 [Capitella teleta]	25756.3	38328.8	26529.5	30422.7	24221.7	31958.3	22354	21303.2	24572.4	58800	40926.8	24317.7
780046515	PREDICTED: uncharacterized protein LOC100891970 isoform X1 [Strongylocentrotus purpuratus]	28036.7	56663.7	56008.7	21133.3	27497.2	37464.9	46756.2	35113	39580.4	36843.9	47363.6	40406.1
762151376	PREDICTED: protein phosphatase methylesterase 1-like [Crassostrea gigas]	36852.7	71515.7	60465.5	69879.1	82156.3	91370.5	65158.2	73309.3	69603.8	91575.2	58597	88680.5
817182532	PREDICTED: NADH dehydrogenase [ubiquinone] 1 subunit C2 [Orussus abietinus]	194390	228023	134334	206921	144962	142923	196042	273344	150306	190455	147818	181997
762075433	PREDICTED: zinc finger RNA-binding protein-like isoform X1 [Crassostrea gigas]	42177.4	39473.9	62328	36048	47023.1	30529.8	42068.1	43622.8	50542.3	39037.7	62203.7	41674.5
675367766	Ras suppressor protein 1, partial [Stegodyphus mimosarum]	108372	113135	106759	117001	106813	138105	110013	135466	129321	157894	92550.4	122715
405954837	Tryptophanyl-tRNA synthetase, cytoplasmic [Crassostrea gigas]	65341.5	67215.5	66254.2	70501.4	36521.6	64046	59290.4	67633.4	77947.5	61575.9	61447	72798.4
762091450	PREDICTED: histone acetyltransferase type B catalytic subunit-like [Crassostrea gigas]	42084.3	53403.4	55726.8	46693.3	38712	52398.2	56609.1	34621.9	54279.4	58754.7	60966.7	47833
762152388	PREDICTED: transmembrane emp24 domain-containing protein 2-like [Crassostrea gigas]	60492.9	52779	59943.1	47286.8	40318.5	71330.1	66079.5	57089.2	65910.1	39632.4	57644.4	73412.8
Q8BMF4	ODP2_MOUSE Dihydrolipoyllysine-residue acetyltransferase component of pyruvate dehydrogenase complex, mitochondrial OS=Mus musculus GN=Dlat PE=1 SV=2	1.40138e+06	1.46149e+06	1.37068e+06	1.34631e+06	1.38677e+06	1.24883e+06	1.3184e+06	1.90358e+06	1.47224e+06	1.36684e+06	1.47042e+06	1.36604e+06
156398184	predicted protein [Nematostella vectensis]	158626	293664	187037	361522	281422	302371	274004	343111	241875	401023	211113	244831
260829110	hypothetical protein BRAFLDRAFT_127655 [Branchiostoma floridae]	4.52986e+06	3.95992e+06	3.23563e+06	4.33928e+06	6.81974e+06	4.33273e+06	4.65506e+06	6.28777e+06	4.675e+06	4.72249e+06	4.41017e+06	4.71925e+06
762165034	PREDICTED: carbonyl reductase [NADPH] 1-like [Crassostrea gigas]	159064	203858	197355	138193	231721	230700	170024	276972	158931	229752	176040	245102
676432956	hypothetical protein LOTGIDRAFT_224755 [Lottia gigantea]	42319.2	61778.2	94922.6	42476.9	50501.4	45012.2	86914.6	14540.7	64807.3	28763.1	100904	68882
291231862	PREDICTED: uridine 5'-monophosphate synthase-like [Saccoglossus kowalevskii]	54751.1	63071.6	81462.8	52062.6	39292.2	73255.6	74126.2	39218.9	68998	61467.4	76449.7	73547
524916507	PREDICTED: major egg antigen-like [Aplysia californica]	155817	277733	284116	355962	309106	343484	243915	387655	314841	312047	277511	331557
646722786	Cytochrome c oxidase subunit 6A, mitochondrial [Zootermopsis nevadensis]	315075	350067	260416	360757	341753	412747	329862	481290	394094	406337	327541	268597
524879767	PREDICTED: heme-binding protein 1-like [Aplysia californica]	22357.7	32460.4	23220	61841.6	15503.9	62065.5	24007.4	17779.1	45962.8	53401.3	53901.7	40130.2
405954873	hypothetical protein CGI_10002658 [Crassostrea gigas]	345547	256769	369674	216270	180097	195385	410043	146045	268223	232370	343995	290378
847132402	PREDICTED: mucin-like protein [Xenopus (Silurana) tropicalis]	56422.4	33497.4	18699.9	17346.8	75054.8	37799.6	37977.1	38263.9	57862.6	16687.3	36575.9	70862.4
762081355	PREDICTED: 40S ribosomal protein S3a-like [Crassostrea gigas]	509716	859119	826058	684294	798054	748414	886161	759088	816790	735562	765829	821802
524872284	PREDICTED: NADH dehydrogenase [ubiquinone] 1 beta subcomplex subunit 10-like [Aplysia californica]	726493	1.01471e+06	685342	876547	909324	1.06383e+06	842771	1.26358e+06	952250	1.06543e+06	718287	860832
405966807	Stromal membrane-associated protein 2 [Crassostrea gigas]	55359.6	69658.8	55771.9	62959.5	56425.5	68769.3	68620.1	68163.6	70292.2	74630.4	58758.6	58227.3
524891243	PREDICTED: SWI/SNF-related matrix-associated actin-dependent regulator of chromatin subfamily A member 5-like [Aplysia californica]	72861.7	86924.7	103386	56423	45218.3	69586.4	91922.3	58452.1	76762.8	91260.7	75936.6	74880.8
871208129	PREDICTED: ATPase ASNA1 homolog [Aplysia californica]	21211.5	12958.8	19096	22783.3	19546.7	23498.7	20001.2	24429.3	19930.3	23114.6	19273.9	21885.8
646718736	Leucine-rich PPR motif-containing protein, mitochondrial [Zootermopsis nevadensis]	293313	378842	408998	347111	319188	309757	402933	313557	412231	357875	347910	387293
506968275	tetraspanin D107 [Coptotermes formosanus]	700561	576015	637341	706096	625110	865319	754855	655303	743179	643359	876750	765194
676482407	hypothetical protein LOTGIDRAFT_207066 [Lottia gigantea]	184412	147958	204676	123768	135519	155494	180194	143398	194294	187094	184967	137380
676481085	hypothetical protein LOTGIDRAFT_210692 [Lottia gigantea]	74260.1	65877.9	51478.4	93072.7	80700.4	80154.1	78499.6	84993.4	83779.5	78154.5	75560.5	79882.7
591366787	PREDICTED: phenylalanine--tRNA ligase beta subunit [Chelonia mydas]	45718.4	52221.1	72122.3	46501.5	37493.7	50261.4	66446.3	42256.4	59876.2	51338.9	34303.3	74072.9
237862674	ribosomal protein S4 [Lepidochitona cinerea]	1.30925e+06	1.31845e+06	2.02968e+06	1.22152e+06	1.15037e+06	1.35517e+06	1.66212e+06	1.04182e+06	1.7226e+06	1.43553e+06	1.50128e+06	1.68146e+06
676473714	hypothetical protein LOTGIDRAFT_206843 [Lottia gigantea]	20027.2	12630.4	18267.9	11967.3	1788.53	10852.1	18675.8	6901.44	12528.5	13847.2	15139.9	14361.4
676443781	hypothetical protein LOTGIDRAFT_226396 [Lottia gigantea]	661097	306070	263156	760330	753588	486968	471559	832379	525083	646841	477256	531204
524892331	PREDICTED: heat shock 70 kDa protein 4-like [Aplysia californica]	66427.7	103402	122043	69034.1	85886.8	68559.4	101605	66546.3	86827.8	87984.9	109475	102914
524873900	PREDICTED: conserved regulator of innate immunity protein 3-like [Aplysia californica]	573189	519256	485033	439273	641844	446681	481542	801251	510944	547312	399160	605792
871237491	PREDICTED: RAC-gamma serine/threonine-protein kinase-like [Aplysia californica]	233961	135376	151027	108174	78805.7	137832	185667	130365	117163	217551	137497	122090
675859086	hypothetical protein HELRODRAFT_98900 [Helobdella robusta]	51652.4	35105.4	136152	24491.3	20714.9	61259.4	68035.2	25740.8	61692.2	66109.7	71852.5	61293.9
676447304	hypothetical protein LOTGIDRAFT_208680 [Lottia gigantea]	8580.22	8450.15	8411.05	22721.1	14473	16050.1	13665.6	9234.44	15899.6	14620.9	13592.1	17711.9
166952299	ribosomal protein rpl18a [Lineus viridis]	505848	613889	752469	431122	373385	440048	704025	360069	545190	508024	666013	572449
675368136	60S ribosomal protein L13, partial [Stegodyphus mimosarum]	393276	569179	544838	472467	447857	497827	594685	563751	558327	460499	578092	393493
871245287	sulfotransferase 6B1-like, partial [Aplysia californica]	25955.4	48924.3	55842.8	93224	60690.3	101972	53154.7	55373.4	87772.6	69012.8	91352.4	59214.4
762145704	PREDICTED: V-type proton ATPase subunit S1-like [Crassostrea gigas]	155903	106499	87862.6	130087	147898	141679	105500	168789	145020	141844	122336	144410
524925918	PREDICTED: twinfilin-1 isoform X2 [Mesocricetus auratus]	165913	139380	122681	161803	149011	155019	134367	147415	152421	207034	139357	180458
542217689	PREDICTED: dnaJ homolog subfamily B member 6-B-like isoform X2 [Oreochromis niloticus]	7395.14	56741.8	55150.7	65801.2	54241.3	52370.3	44752.9	56015.4	51742.9	62961.9	49526	48530.6
24646906	effete, isoform A [Drosophila melanogaster]	517576	435454	554347	466749	457230	634679	512785	558223	605499	520728	527460	567317
676460331	hypothetical protein LOTGIDRAFT_228660 [Lottia gigantea]	20332.2	19865	2260.39	25404.3	11112.8	9191.36	502.244	41428.9	8970.87	13297.7	29677.9	756.638
676492085	hypothetical protein LOTGIDRAFT_222617 [Lottia gigantea]	102459	69826.5	84331.6	64072.9	70511.7	67340.6	82450.2	77178.7	82209.8	87044.7	80035.6	83095.8
602730305	PREDICTED: hematopoietic lineage cell-specific protein isoform X1 [Lipotes vexillifer]	21504.3	5606.63	13390.9	22666.5	35359.9	17357	21672.4	29496.3	18687.7	23356.7	5589.78	25505.8
524868922	PREDICTED: AP-1 complex subunit gamma-1-like isoform X2 [Aplysia californica]	70033	53977.6	69232.8	70060	66034.2	75048.8	79212.9	58779.7	90489.1	46419.6	80764.8	78098.7
260824137	hypothetical protein BRAFLDRAFT_60565 [Branchiostoma floridae]	483725	453700	472517	481771	501131	559068	480490	574249	548114	504720	488528	569013
848133137	peroxiredoxin 5 [Sepiella maindroni]	881702	957344	952835	1.19149e+06	976515	1.17754e+06	976973	1.31823e+06	1.24768e+06	904338	1.1118e+06	1.01477e+06
524874542	PREDICTED: signal recognition particle receptor subunit beta-like [Aplysia californica]	68901	99130.7	85737.4	100063	88011.2	102338	107670	93647.5	87989.5	97863	92824.3	102838
765826487	heat shock protein 83-like [Crassostrea gigas]	1.16333e+06	1.29231e+06	1.29261e+06	826665	908097	1.09404e+06	1.30224e+06	940473	1.25302e+06	994353	1.3911e+06	1.16213e+06
524875682	PREDICTED: NADH dehydrogenase [ubiquinone] 1 beta subcomplex subunit 9-like [Aplysia californica]	175086	355923	258875	333417	321219	372366	325081	338680	328008	401246	271181	281189
762075437	PREDICTED: zinc finger RNA-binding protein-like isoform X3 [Crassostrea gigas]	458131	684520	758235	332498	382709	440383	628117	404128	547565	523611	655679	512994
76573377	60S ribosomal protein L13A [Mytilus edulis]	24855.6	240164	301855	217084	145294	222610	226973	173769	270284	130775	265519	165737
388571220	prostaglandin E synthase 3 [Ostrea edulis]	102233	145892	64511.9	337747	119956	163435	87984.4	293512	176062	148946	222560	70076.1
405972660	Nucleosome assembly protein 1-like 4 [Crassostrea gigas]	1.08743e+06	1.06419e+06	1.05082e+06	679961	915623	690397	1.02574e+06	1.11269e+06	861203	1.03475e+06	902075	931015
67083895	ribosomal protein S25 [Ixodes scapularis]	1.7766e+06	1.63024e+06	1.5016e+06	1.0814e+06	1.18598e+06	1.20774e+06	1.50929e+06	1.80825e+06	1.37225e+06	1.76608e+06	1.1912e+06	1.31305e+06
657529459	PREDICTED: ragulator complex protein LAMTOR5 [Stegastes partitus]	2607.12	3371.43	14001.8	15800.4	21653.3	5347.56	15230.2	9322.77	4330.61	13263.4	15651.8	9255.42
676442972	hypothetical protein LOTGIDRAFT_203658 [Lottia gigantea]	164539	182296	145484	171396	200431	179129	165611	241191	182479	185847	174109	164788
260798498	hypothetical protein BRAFLDRAFT_201265 [Branchiostoma floridae]	25106.2	36032.8	47662.1	22200	19214.1	30130.3	33016.7	25430.2	38315.5	24360.5	38700.7	32733.6
575498399	acetylcholinesterase [Octopus vulgaris]	24717.3	6086.4	29898.8	26650	20323.5	47363.9	37117.7	16003.9	38883.8	8046.66	29609.1	35866.8
524870848	PREDICTED: glycine--tRNA ligase-like [Aplysia californica]	303872	332892	464600	219845	241957	292636	397447	209096	304153	306672	433756	329680
524873436	PREDICTED: methylmalonyl-CoA mutase, mitochondrial-like [Aplysia californica]	31650.7	36737.1	33566.2	31646.1	34465.4	34983.5	33669.3	34231.1	39167	35041.7	31203.5	43386.7
443704443	hypothetical protein CAPTEDRAFT_173491 [Capitella teleta]	463649	543198	591866	270662	445648	470054	518199	464700	501395	469825	515543	501659
763431373	RIG-like receptor 1 [Mytilus galloprovincialis]	30567.2	22285.4	14254.6	62071.1	59966.5	43841	27481.8	58558.9	45838	47125.9	26109.2	43383.1
22758848	ribosomal protein L30 [Argopecten irradians]	988088	1.15396e+06	1.05086e+06	685352	815668	932298	1.04243e+06	1.01991e+06	1.01377e+06	1.05257e+06	904837	964441
524887580	PREDICTED: serine--tRNA ligase, cytoplasmic-like [Aplysia californica]	425979	555610	524774	424450	412657	444714	564552	427130	483875	529200	492468	474130
524871066	PREDICTED: mitochondrial import inner membrane translocase subunit TIM44-like isoform X1 [Aplysia californica]	50458.1	49218.2	34857.5	46063.5	50359.2	54359.2	43715	61564.2	55462.3	56896.7	36148.9	50256.4
676478858	hypothetical protein LOTGIDRAFT_234917 [Lottia gigantea]	415280	409088	495045	157219	182781	390965	426799	243420	370007	311744	518375	314286
762110504	PREDICTED: metastasis-associated protein MTA3-like isoform X1 [Crassostrea gigas]	22391.3	55622.6	68443.4	28377.9	28854.6	40606.7	51184.5	30399.2	40235.9	41178.1	52519.9	44686.3
675893112	hypothetical protein HELRODRAFT_186249 [Helobdella robusta]	179163	215791	177288	194864	180739	245306	211927	244694	206526	220769	197988	188087
13561069	octopine dehydrogenase [Sepia officinalis]	2.07762e+06	4.29678e+06	5.19429e+06	1.8717e+06	2.04586e+06	3.63863e+06	3.64905e+06	2.6254e+06	3.6042e+06	2.6565e+06	4.44185e+06	3.36392e+06
169930291	G alpha i subunit [Euprymna scolopes]	155029	143388	139115	119354	92773.3	145670	148171	105760	155683	162497	141809	131941
676465572	hypothetical protein LOTGIDRAFT_217135 [Lottia gigantea]	137152	138694	191636	66808.8	455874	145197	250168	115042	215697	191263	252806	182314
762149800	PREDICTED: AP-2 complex subunit sigma isoform X1 [Crassostrea gigas]	17984.8	27443.1	16125.1	23316.9	16663.3	25632.1	30281.6	15684.5	19325.3	20929.3	21549.7	27440.7
507682715	PREDICTED: cytochrome P450 4V2 [Octodon degus]	20909.7	13815.8	18740.1	29478.5	10156.7	22819	13881.9	17466.2	26418	22633.3	15679.7	27119.1
554859092	PREDICTED: 60S ribosomal protein L35-like isoform X1 [Haplochromis burtoni]	769862	732817	656814	503501	682493	605254	661535	864850	723271	834438	608481	504725
P54612	2AAA_PIG Serine/threonine-protein phosphatase 2A 65 kDa regulatory subunit A alpha isoform OS=Sus scrofa GN=PPP2R1A PE=2 SV=2	679718	803008	819597	889224	792955	945445	915804	821888	890131	975920	805074	827565
675854062	hypothetical protein HELRODRAFT_156470 [Helobdella robusta]	446633	506292	536816	270982	242188	332352	513515	282660	386194	392189	452183	452654
762163148	PREDICTED: proliferation-associated protein 2G4-like [Crassostrea gigas]	611369	632235	662849	588140	576571	560263	732722	490106	688683	645045	712990	579422
358337301	hypothetical protein CLF_108711 [Clonorchis sinensis]	149267	175705	167777	214090	234890	255102	199525	213907	231470	205129	225159	192564
676444658	hypothetical protein LOTGIDRAFT_158825 [Lottia gigantea]	20485.4	22532.8	31908.3	31483.2	25487.2	31172.5	25063.8	23438.7	33024.8	26692.7	33111.1	31366
Q9WTP7	KAD3_MOUSE GTP:AMP phosphotransferase AK3, mitochondrial OS=Mus musculus GN=Ak3 PE=1 SV=3	158993	132077	114665	233164	255080	179245	158827	221735	186259	206231	141038	221901
405953294	Kyphoscoliosis peptidase [Crassostrea gigas]	96285.2	68643	90106.1	65034.4	94809.7	88302.1	93132.9	62232.3	87998.9	77376.1	104082	107695
524870300	PREDICTED: 60S ribosomal protein L9 [Aplysia californica]	1.0681e+06	1.11344e+06	1.14277e+06	424446	633944	689831	1.00812e+06	762711	856311	777334	884155	1.07758e+06
Q6VRB0	ANM1B_XENLA Protein arginine N-methyltransferase 1-B OS=Xenopus laevis GN=prmt1-b PE=2 SV=1	31528.1	55291.6	59635.6	33572	20231.2	33910.7	58072.6	23785.7	29243.6	34881.7	53196.5	48413.6
126697326	chaperonin containing tcp1 [Haliotis discus discus]	1.69035e+06	1.7479e+06	1.9049e+06	1.50343e+06	1.40244e+06	1.52057e+06	1.83375e+06	1.46653e+06	1.71504e+06	1.91772e+06	1.69772e+06	1.69583e+06
A7HHN3	UREG_ANADF Urease accessory protein UreG OS=Anaeromyxobacter sp. (strain Fw109-5) GN=ureG PE=3 SV=1	40162.6	86433.7	79824.2	118488	96486.4	111613	95838.5	94110.4	108247	127649	26504.1	110329
350540096	lysosome-associated membrane glycoprotein 1 precursor [Cricetulus griseus]	843338	719866	677582	970736	1.16494e+06	1.00494e+06	731064	1.16769e+06	1.05528e+06	1.01163e+06	749899	959829
405957680	Inter-alpha-trypsin inhibitor heavy chain H3 [Crassostrea gigas]	343289	207424	242345	112888	178361	151281	218818	275718	128320	325050	197821	157189
871275231	PREDICTED: apoptosis-inducing factor 1, mitochondrial isoform X2 [Aplysia californica]	146508	419125	448444	553399	475900	526080	348522	477712	583368	362665	505390	429394
676448111	hypothetical protein LOTGIDRAFT_181759 [Lottia gigantea]	142041	96160	92916.7	81550.5	77228.1	93820	117783	69523.6	111091	82315.4	124789	109407
768429009	PREDICTED: 60S acidic ribosomal protein P0 [Plutella xylostella]	1.47893e+06	1.88222e+06	1.79562e+06	1.45052e+06	1.39615e+06	1.42519e+06	1.80184e+06	1.69464e+06	1.63482e+06	1.91297e+06	1.39913e+06	1.48778e+06
700589040	hypothetical protein [Phragmatopoma lapidosa]	405184	595508	442552	481887	529918	624282	633774	519961	584387	448194	595784	461118
762149390	PREDICTED: uncharacterized protein C167.05-like isoform X3 [Crassostrea gigas]	237286	278002	297246	445443	402139	446458	342341	435976	435700	303505	349394	350089
762082085	PREDICTED: eukaryotic translation initiation factor 1-like [Crassostrea gigas]	156844	159410	135420	199543	189781	174867	158198	210163	164722	228854	149485	157491
390360333	PREDICTED: retinol dehydrogenase 12 isoform X1 [Strongylocentrotus purpuratus]	22231.8	7193.02	9533.9	23039.4	21414.4	32512.6	21026	11152.3	26698.2	22189.6	13642.8	27213.9
662215379	PREDICTED: mitochondrial pyruvate carrier 2-like [Diaphorina citri]	1094.07	22348.8	21350.6	27783.5	9736.82	20017.1	16042.6	23167.1	15073	15248.5	16882.6	21206.5
762078103	PREDICTED: cytoplasmic dynein 1 heavy chain 1-like isoform X3 [Crassostrea gigas]	671136	702221	867284	538225	438333	539903	679593	381359	722872	575831	870349	721091
762121833	PREDICTED: putative peptidyl-prolyl cis-trans isomerase dodo [Crassostrea gigas]	97166.4	71672.7	49687.6	134902	146695	104632	82301.4	111274	112317	123730	86840.1	118576
762126181	PREDICTED: uncharacterized protein LOC105341347 [Crassostrea gigas]	125228	106829	123410	183987	147529	120913	138458	111641	149968	170173	132618	145032
492370606	cathepsin L2 [Sinonovacula constricta]	45121.7	50114.1	41212.4	55134.3	37963.7	56980.3	60353.1	51798.9	30884.8	58217.6	47187	52232.4
443701329	hypothetical protein CAPTEDRAFT_161906 [Capitella teleta]	1.37377e+06	1.6233e+06	1.40584e+06	1.31396e+06	1.20436e+06	1.12639e+06	1.66048e+06	1.61811e+06	1.17167e+06	1.37155e+06	1.34793e+06	1.27447e+06
762081143	PREDICTED: calpain-9-like [Crassostrea gigas]	958946	277812	414748	1.81622e+06	1.23923e+06	1.77987e+06	919197	616747	1.51417e+06	1.30792e+06	874895	1.57336e+06
762099250	PREDICTED: eukaryotic translation initiation factor 3 subunit D-like [Crassostrea gigas]	420032	520019	532529	382904	327173	396598	487793	425534	433453	399911	490163	468074
212168866	S1 type peptidase [Octopus kaurna]	1.52717e+06	1.02485e+06	1.21638e+06	898364	771294	1.99238e+06	1.32256e+06	735852	1.66662e+06	1.28314e+06	1.06773e+06	1.71625e+06
657802713	PREDICTED: 3-mercaptopyruvate sulfurtransferase-like isoform X2 [Cynoglossus semilaevis]	41975.1	33395.9	32531.7	86215	49548.5	60170.4	44640.4	45779.1	64013.5	59998.1	48268.3	55838.1
524875728	PREDICTED: uncharacterized protein LOC101847027 isoform X1 [Aplysia californica]	364906	354947	379166	345841	335819	445303	440468	290763	384533	378895	492623	342515
676482987	hypothetical protein LOTGIDRAFT_195070 [Lottia gigantea]	918942	873413	738712	1.79227e+06	1.6312e+06	1.15463e+06	1.01183e+06	1.48059e+06	1.3478e+06	1.43017e+06	878162	1.29029e+06
646713078	Coiled-coil domain-containing protein 56 [Zootermopsis nevadensis]	40524.1	40838	22414.8	34635.7	12412	31973.3	31483.7	48902	37253.3	42699.6	23078.5	7774.1
762154947	PREDICTED: uncharacterized protein LOC105319647 isoform X1 [Crassostrea gigas]	65510.6	78166.9	85481.6	66215.2	55549.6	86845.5	81525.2	70885.4	70415.9	63803	95246.8	75861.2
524898674	PREDICTED: 5-demethoxyubiquinone hydroxylase, mitochondrial-like [Aplysia californica]	7461.99	6552.52	6583.22	5893.62	3424.91	1384.67	3473.03	6278.22	5666.64	4537.13	6979.74	5788.78
871255813	PREDICTED: thioredoxin-related transmembrane protein 1-like [Aplysia californica]	51425.4	41969.8	53275.5	89388.6	33851.8	59444.7	42532.9	86958	51199	61610.6	40431.4	61587.2
762159929	PREDICTED: BTB/POZ domain-containing protein KCTD12-like [Crassostrea gigas]	65539.3	139114	138328	108762	66667.6	148008	129769	74176.8	108120	114982	131896	137656
255918300	chloride intracellular channel [Crassostrea angulata]	351068	243588	258297	432815	341756	423631	330319	331010	390847	376840	345535	368614
676469246	hypothetical protein LOTGIDRAFT_204153 [Lottia gigantea]	115300	190205	157235	218835	162071	239441	173512	197568	184093	242830	153566	179450
762094017	PREDICTED: GMP synthase [glutamine-hydrolyzing]-like [Crassostrea gigas]	98876.7	30841	41048.3	29439.7	17812.4	42575	53199.4	33267.3	46245.1	40878.7	48782.6	49706.7
507637247	PREDICTED: methyltransferase-like protein 7B [Echinops telfairi]	9010.95	6326.98	16367.7	13657	12861.7	31847.2	7895.11	11407.6	21977.1	14471.4	15448.8	22720.1
524879253	PREDICTED: uncharacterized protein LOC101846644 [Aplysia californica]	58696.1	29852.7	32790.5	143174	123258	125187	54409.9	85549.1	110535	178111	31997.5	74269.5
676421868	hypothetical protein LOTGIDRAFT_103320 [Lottia gigantea]	13936.1	12130.8	31486.8	16350.3	21222.7	23063.2	28208.1	13302.4	18501.8	13042.7	18450	31727.9
762129835	PREDICTED: RNA-binding protein 45-like isoform X1 [Crassostrea gigas]	77894.7	82439.7	58034.8	70344.6	52675.2	90853.8	64900.5	88237.3	67592.5	79347.9	63742.3	86804.3
524874572	PREDICTED: V-type proton ATPase subunit F-like [Aplysia californica]	87175.9	97086.3	87166.1	120196	115074	109981	114744	115029	99398.7	111706	100204	100980
762160619	PREDICTED: glutaryl-CoA dehydrogenase, mitochondrial-like [Crassostrea gigas]	13712.7	25322.1	24897.8	20188.6	17926.7	20501.5	30437.2	3695.41	24589.2	23653.5	35090.1	10096.3
A5JSS2	RL21_CAPHI 60S ribosomal protein L21 OS=Capra hircus GN=RPL21 PE=2 SV=1	322206	413711	421601	335114	451730	386071	474459	468281	390981	498314	308614	283143
325296901	synapse-associated protein [Aplysia californica]	367834	347162	300538	469296	482376	437795	345049	525600	430678	425197	340456	434085
762154101	PREDICTED: NADH dehydrogenase [ubiquinone] iron-sulfur protein 3, mitochondrial-like isoform X1 [Crassostrea gigas]	402639	401883	339696	314654	336694	363538	385464	411354	375369	371769	358497	342251
524876138	PREDICTED: ribosomal protein S6 kinase 2 beta-like [Aplysia californica]	19743.7	7836.75	510.515	24523.1	23681	22556.2	13960.4	18761.3	20387.5	18328.1	15468.8	15862.5
543729342	PREDICTED: ankyrin repeat and SAM domain-containing protein 4B [Columba livia]	36268	32905.2	21461.8	63036.2	52840.3	23036.5	31406	62924.5	35651.7	42912.4	23342.9	42259.8
762125838	PREDICTED: eukaryotic translation initiation factor 3 subunit I-like [Crassostrea gigas]	383517	292854	367896	316729	283559	240753	337169	326120	310790	288139	351290	343415
444727734	Actin, cytoplasmic 2 [Tupaia chinensis]	354933	289707	333259	497666	430785	471725	363446	385026	474542	306190	490950	447807
296531416	flotillin-1 [Saccoglossus kowalevskii]	106427	111372	118885	154970	120535	131497	124190	139809	141161	130429	117349	118768
524915787	PREDICTED: NADH dehydrogenase [ubiquinone] 1 alpha subcomplex subunit 5-like [Aplysia californica]	469278	704323	535788	609038	609247	804512	562602	801913	691706	617682	579169	619225
815809287	PREDICTED: small nuclear ribonucleoprotein Sm D3 [Linepithema humile]	243905	313545	258927	174357	159637	228133	236318	270757	261889	213092	247384	200732
514758710	PREDICTED: endoplasmin, partial [Anas platyrhynchos]	2.37637e+06	2.27795e+06	2.29723e+06	2.32087e+06	2.19043e+06	2.21409e+06	2.33653e+06	2.093e+06	2.59121e+06	2.4184e+06	2.34194e+06	2.39104e+06
762138581	PREDICTED: C-1-tetrahydrofolate synthase, cytoplasmic-like [Crassostrea gigas]	58864.8	43616.5	64641.3	52523.2	59114.5	60688.5	55919.1	56736.2	58753.4	60169.5	54881.2	65161.5
553727084	1,2-dihydroxy-3-keto-5-methylthiopentene dioxygenase [Loxodonta africana]	188568	121488	112533	185876	211145	168515	121827	213113	157544	217801	145031	168160
524890037	PREDICTED: protein NDRG3-like isoform X1 [Aplysia californica]	16323.6	15131.9	15348.5	11385.3	12390	14372.6	15545.5	12083.4	14512.1	11140.3	18865.5	15841.1
762116658	PREDICTED: protein ERGIC-53-like [Crassostrea gigas]	36255.8	36556.9	35411.8	38690.5	49590.1	39002.7	40627.5	41518.7	43619.6	44387.2	30895.2	42641.9
524882968	PREDICTED: heat shock 70 kDa protein cognate 5-like [Aplysia californica]	508714	390847	423872	279343	298337	378222	390418	343774	434011	361022	398616	429430
762081924	PREDICTED: nidogen-2-like [Crassostrea gigas]	17271.9	10100.6	8055.28	1579.94	21915.9	14153.4	12858.4	17128.3	9218.75	13351	10250.2	12767.6
675379841	Activated RNA polymerase II transcriptional coactivator p15, partial [Stegodyphus mimosarum]	527756	584562	484654	302629	502312	470813	449979	542417	493301	483605	501434	498993
762117140	PREDICTED: density-regulated protein-like [Crassostrea gigas]	75615.9	76791.9	83961.8	83418.8	79480.7	77126.3	75143.8	79052	85458.7	91382.5	79397.2	81770.8
406055040	calreticulin [Hyriopsis cumingii]	2.0658e+06	2.15112e+06	1.78248e+06	1.83969e+06	2.43455e+06	1.88918e+06	2.0224e+06	2.12859e+06	2.15531e+06	2.05781e+06	1.98824e+06	2.21238e+06
557022368	PREDICTED: probable thiopurine S-methyltransferase-like isoform X1 [Latimeria chalumnae]	141757	98767.7	75486.4	155548	127447	160432	125529	138820	149571	142921	134954	91993.8
524897563	PREDICTED: high mobility group protein B3-like [Aplysia californica]	637856	595028	522934	706934	703327	649616	538621	918313	681474	708818	506263	581919
676450362	hypothetical protein LOTGIDRAFT_187900 [Lottia gigantea]	340578	354793	397728	278974	279683	358454	344172	250679	364689	333124	357708	422853
291242664	PREDICTED: NHP2-like protein 1-like [Saccoglossus kowalevskii]	275655	277334	253379	325900	286386	360061	277346	339831	311939	350338	251422	303002
676475719	hypothetical protein LOTGIDRAFT_219052 [Lottia gigantea]	21674.1	20598	28424.5	21774	25445.8	22843.6	22887.4	21369.4	25255.6	28640.8	22116.1	24836.4
524872186	PREDICTED: heterogeneous nuclear ribonucleoprotein U-like protein 1 [Aplysia californica]	1.20073e+06	1.72166e+06	1.81186e+06	476014	605278	772193	1.42203e+06	967528	1.05287e+06	905850	1.38295e+06	1.05282e+06
478257564	hypothetical protein YQE_05789, partial [Dendroctonus ponderosae]	48618.1	36067	40344.1	31008.2	23093.3	30852.5	47051.6	21671.4	34829.5	34057.3	46117.7	32488.1
676489036	hypothetical protein LOTGIDRAFT_176120, partial [Lottia gigantea]	43893.3	25080.1	52565.9	8849.8	18008.5	23919.3	47413.2	8356.11	28456.3	25255.5	35326.2	32540.8
524907640	PREDICTED: ATP-dependent zinc metalloprotease YME1L1-like isoform X1 [Aplysia californica]	139095	118453	126877	109596	106859	122824	126484	119375	122580	125258	123823	127266
871272628	PREDICTED: vesicle-trafficking protein SEC22b-like isoform X1 [Aplysia californica]	184228	175076	125018	159963	153463	150588	175161	184463	148770	163624	160515	143156
676448160	hypothetical protein LOTGIDRAFT_181794 [Lottia gigantea]	203379	219312	229071	343779	302234	321764	232068	388248	279883	265941	242990	256710
443686443	hypothetical protein CAPTEDRAFT_175992 [Capitella teleta]	581796	589664	663023	489293	520925	549452	593984	479722	571117	616473	655508	574282
675378949	Protein SET, partial [Stegodyphus mimosarum]	215011	185388	262374	152760	182540	174722	237431	199165	145941	171652	167319	283942
871271169	PREDICTED: RNA-binding protein cabeza-like isoform X3 [Aplysia californica]	364329	455387	633104	860005	633250	542100	534414	786648	641266	473104	638432	510953
762146464	PREDICTED: actin-like protein 6B [Crassostrea gigas]	49449.3	56713.7	69026.4	41332	32920.6	35185.4	43428.9	47556.2	47943.9	38269.8	52939.9	62139.8
405963791	RNA-binding protein 39 [Crassostrea gigas]	4050.54	22327.3	19143.8	20502	19034	21217.3	20637.1	22333.6	19057	22878.9	4341.82	19800.6
391340814	PREDICTED: eukaryotic translation initiation factor 1A, X-chromosomal-like [Metaseiulus occidentalis]	384694	297761	322936	422968	368041	341978	324882	445459	382083	388392	313503	339526
762139006	PREDICTED: protein transport protein Sec61 subunit beta-like [Crassostrea gigas]	67052.1	64832.8	70317	62825.5	56450.3	48423.4	61029.8	63183.3	60984.7	39782.8	92214.3	62225.5
Q6PEH5	UB2V2_DANRE Ubiquitin-conjugating enzyme E2 variant 2 OS=Danio rerio GN=ube2v2 PE=2 SV=1	150878	107207	117694	108345	127492	162094	135602	122613	142005	116907	143925	131697
188572538	putative 60S ribosomal protein RPL26 [Phoronis muelleri]	182538	147466	162490	89698.4	81496.2	112157	160948	132870	128171	118356	159753	94671.5
762168568	PREDICTED: nose resistant to fluoxetine protein 6-like [Crassostrea gigas]	71809.6	63876.9	60005.9	87002.5	95535.7	87525.4	81232.6	100635	87063.4	71224.2	63536.9	73203.8
762123558	PREDICTED: eukaryotic translation initiation factor 3 subunit L-like [Crassostrea gigas]	157749	170263	185466	184467	149862	177570	189047	140469	181469	200634	179160	158712
40074252	alpha macroglobulin [Azumapecten farreri]	108680	88937	91229.3	60498.5	52366.4	68033	65442.2	65859.3	81075.2	77969.2	103784	86272.4
675380729	Fumarate hydratase, mitochondrial, partial [Stegodyphus mimosarum]	30822	19195.5	18561.5	19172.4	16249.1	22927.5	20177	25146.4	22821.8	16525.6	20611.8	24522.2
676450554	hypothetical protein LOTGIDRAFT_231723 [Lottia gigantea]	553713	749495	684063	599588	527024	769514	706770	358998	738358	602430	781931	778791
762145393	PREDICTED: neural Wiskott-Aldrich syndrome protein-like isoform X2 [Crassostrea gigas]	18765.7	32077.3	27961.5	31357.1	24148.2	21856.2	24970.1	36971.2	15962.8	32703.5	17688.8	31191.1
405967409	Vacuolar protein sorting-associated protein 35, partial [Crassostrea gigas]	372831	338004	401114	480078	479895	374410	403440	394378	392939	490302	415131	401781
126697456	ribosomal protein l17 [Haliotis discus discus]	227593	235958	252968	274095	250809	173349	217234	290083	228093	263983	288027	155661
390361620	PREDICTED: MICOS complex subunit Mic10 [Strongylocentrotus purpuratus]	105787	86629.5	95334.8	103397	103516	111355	106042	115684	99206.2	96417.5	103372	97018.9
642115112	unnamed protein product [Oncorhynchus mykiss]	63607.9	98765.2	106685	137474	141328	97312.1	104993	143641	109342	106150	73228	120267
260790294	hypothetical protein BRAFLDRAFT_115295 [Branchiostoma floridae]	179035	199500	195112	185492	170232	200230	196002	180630	209860	205564	184247	174762
524898725	PREDICTED: ER membrane protein complex subunit 8-like [Aplysia californica]	111069	198420	163910	158517	182438	196625	159693	203995	155649	208054	134611	168177
333449448	putative pyridoxine biosynthesis SNZERR, partial [Crassostrea ariakensis]	292126	279510	302007	220216	262071	276866	311113	319476	256495	249430	213710	312409
676491619	hypothetical protein LOTGIDRAFT_236479 [Lottia gigantea]	210980	176048	214199	174282	162411	184506	201010	174464	186135	183549	201928	195783
676454931	hypothetical protein LOTGIDRAFT_232029 [Lottia gigantea]	730862	809195	823208	674562	812485	801199	783641	813569	780357	801501	777258	778203
871207125	PREDICTED: chloride intracellular channel protein 1-like [Aplysia californica]	166017	182708	192008	176987	198410	211913	198404	163639	192139	190857	210519	192515
762081850	PREDICTED: cytoplasmic dynein 1 intermediate chain 2-like isoform X13 [Crassostrea gigas]	89474.3	116715	140157	89367.3	102156	97266.6	116158	88198.1	101573	97593.2	129231	113447
110671480	putative ribosomal protein L27Ae [Diaphorina citri]	123893	109863	120314	61027.4	64879.1	85607.9	93749	86054.2	106418	95457.3	110483	83180
385145420	beta tubulin 2 [Sepia officinalis]	252420	415923	491431	252299	301418	368635	339974	310191	348147	305742	442379	370470
762104364	PREDICTED: heterogeneous nuclear ribonucleoprotein A1, A2/B1 homolog isoform X2 [Crassostrea gigas]	1.19243e+06	1.4931e+06	1.67597e+06	1.28872e+06	1.27377e+06	1.39768e+06	1.26343e+06	1.51596e+06	1.46644e+06	1.2288e+06	1.48942e+06	1.49397e+06
551513495	PREDICTED: spermidine synthase-like [Xiphophorus maculatus]	8264.38	9211.1	16141.5	23096.1	16087.1	10086.6	17558.3	11380.4	14462.2	9357.36	14666.5	16804.1
676482987	hypothetical protein LOTGIDRAFT_195070 [Lottia gigantea]	920836	1.00682e+06	761999	1.76754e+06	1.5307e+06	1.35537e+06	1.0305e+06	1.30122e+06	1.46009e+06	1.68851e+06	828008	1.14718e+06
472403383	ATP synthase subunit B (mitochondrion) [Cerebratulus lacteus]	1.5688e+06	1.90912e+06	1.46952e+06	1.78163e+06	1.46559e+06	1.91388e+06	1.7399e+06	1.79377e+06	1.67715e+06	2.07763e+06	1.54549e+06	1.42658e+06
126697396	glutaredoxin 5 [Haliotis discus discus]	155638	57233.1	109856	159091	213191	128095	117527	177917	140352	153369	103641	142005
762070306	PREDICTED: piwi-like protein 1 isoform X2 [Crassostrea gigas]	20968.7	20292.5	23293	24553.8	19038.5	18671.4	18922.6	26143.8	19096	15662.3	24596.1	24192.5
762113409	PREDICTED: inter-alpha-trypsin inhibitor heavy chain H3-like [Crassostrea gigas]	87063.8	69665.2	59218.7	59836.4	67714.2	65540.2	56169.3	75173.5	65956.6	79038.5	63918.4	74536.8
762123446	PREDICTED: integrin-linked protein kinase-like isoform X2 [Crassostrea gigas]	129202	117269	121298	120812	108650	129070	126923	99848.7	115755	107530	138347	147186
747023703	insulin 1 precursor [Conus imperialis]	34919.8	18891.4	16765.1	42750.6	29933.9	26224.7	24782.7	40802.1	23958.3	32474.1	20382	29211.2
762104357	PREDICTED: uncharacterized protein LOC105333433 isoform X3 [Crassostrea gigas]	291471	402953	435452	284775	248057	360548	396532	214195	337256	270169	411471	418592
765149798	PREDICTED: obscurin [Oryzias latipes]	392254	549129	687369	285837	303072	404681	526912	190933	423839	376629	653792	482482
676471656	hypothetical protein LOTGIDRAFT_233963 [Lottia gigantea]	171912	195223	160827	236474	232237	226404	188032	269589	201785	244688	149046	184972
321465290	hypothetical protein DAPPUDRAFT_107161 [Daphnia pulex]	258588	230440	175394	336258	296084	267383	239760	323314	288107	257503	247156	227507
675882514	hypothetical protein HELRODRAFT_186002 [Helobdella robusta]	257762	255784	250078	285576	246207	321139	268040	224226	305112	279515	300440	258710
524908892	PREDICTED: MAP kinase-activated protein kinase 2-like [Aplysia californica]	31957.8	22933.5	18383	36188.7	41857.7	27303.2	27325.6	29003.6	32627.8	36337.8	25830.4	29602.6
443716226	hypothetical protein CAPTEDRAFT_21488 [Capitella teleta]	337452	281644	269254	474367	358469	201946	255503	547151	288608	298525	197509	358045
676431413	hypothetical protein LOTGIDRAFT_212293 [Lottia gigantea]	20005.9	23713	19783.8	23472.1	21080.5	16818.2	20725.2	10188.5	18383.8	32962.4	18994.2	25053.9
762075433	PREDICTED: zinc finger RNA-binding protein-like isoform X1 [Crassostrea gigas]	32794.5	52211.3	66520.9	35305.6	27171.8	43085.2	49238.5	28694	49173.7	32958.3	55979.2	43993.9
212168917	S1 type peptidase [Octopus kaurna]	62196.1	293768	154913	46091.3	38047.9	93525.2	276669	73185.1	100178	60787.4	112063	73484.3
99109681	cytochrome b5 [Haliotis discus discus]	22379.6	35958.5	39014.6	47408.9	57582.8	46319.8	36052.1	51421.2	38681.6	42216.7	38573.3	44520
762158963	PREDICTED: vesicle-associated membrane protein/synaptobrevin-binding protein-like isoform X5 [Crassostrea gigas]	618972	539044	649666	474297	543584	585835	599419	450396	618496	503433	683547	594448
676482421	hypothetical protein LOTGIDRAFT_128665 [Lottia gigantea]	252897	179850	134548	265550	107564	284112	268487	206788	269914	112425	205777	174584
763431397	MAP kinase kinase 3/6-like protein [Mytilus galloprovincialis]	61349.2	45285.3	59542.6	79225.9	72002.2	40174.9	59641	54578.1	57410	71601.7	37764.7	80175.4
237862684	ribosomal protein S16 [Lepidochitona cinerea]	1.13722e+06	796859	696125	848741	494577	992877	750597	706239	1.1237e+06	838493	595694	994804
676441940	hypothetical protein LOTGIDRAFT_238761 [Lottia gigantea]	133272	164348	73472.4	214579	171857	79151.8	105441	233706	139905	72279.9	135896	156398
762083723	PREDICTED: transitional endoplasmic reticulum ATPase [Crassostrea gigas]	876575	1.06686e+06	1.18974e+06	1.40018e+06	1.17365e+06	1.13467e+06	1.19505e+06	900989	1.18829e+06	1.14306e+06	1.19875e+06	1.26935e+06
196014370	elongation factor 1 alpha [Trichoplax adhaerens]	9.73229e+06	9.17231e+06	1.02033e+07	1.0339e+07	9.68878e+06	9.70015e+06	9.23361e+06	1.11641e+07	9.73186e+06	9.88839e+06	9.28543e+06	9.97364e+06
591384433	PREDICTED: melanotransferrin [Chelonia mydas]	116066	70037.5	69508.4	112028	108298	140589	76844.7	129818	113213	147535	75231.3	78015.9
762103083	PREDICTED: 26S proteasome non-ATPase regulatory subunit 6-like [Crassostrea gigas]	450649	527505	514734	394355	379646	522318	602752	369356	498228	489089	423541	424609
443690590	hypothetical protein CAPTEDRAFT_183291 [Capitella teleta]	43710.4	37872.5	42458.5	42017.5	48594.2	43025.4	44169.2	47142.9	44883.5	47452.1	32158.1	43490.5
405974711	Serine/threonine-protein phosphatase 2A regulatory subunit B' [Crassostrea gigas]	55516.5	61595.6	64118.5	58554.1	53157.4	64058.4	66657.4	58955	62341.7	76023.9	61875.7	33359.5
524888015	PREDICTED: tRNA-splicing ligase RtcB homolog [Aplysia californica]	63967.5	55445.2	68678.7	43169.1	44564.9	38379.5	53049.2	66124.5	49898.7	50049.9	54294.9	42592.1
189240738	PREDICTED: NADH dehydrogenase [ubiquinone] 1 beta subcomplex subunit 7 [Tribolium castaneum]	66892.5	125717	70574.2	110174	115617	125491	99280.6	124117	99360.2	102434	96174.6	95734.8
47551153	profilin [Strongylocentrotus purpuratus]	459215	539861	566420	456062	559873	531184	452136	537335	559592	475307	498617	601978
524878917	PREDICTED: uncharacterized protein LOC101849999 [Aplysia californica]	131511	85210.7	71121.7	90803.2	130176	108512	148345	102900	110490	71047	98750.1	88196.9
762107581	PREDICTED: coatomer subunit epsilon-like [Crassostrea gigas]	125281	166075	133586	134394	134675	126794	152073	119176	130274	154178	111967	155506
762155362	PREDICTED: plastin-3-like [Crassostrea gigas]	835206	949640	965128	1.14916e+06	992865	1.01539e+06	1.02541e+06	816457	1.00328e+06	1.08036e+06	995956	1.00145e+06
676493015	hypothetical protein LOTGIDRAFT_222883 [Lottia gigantea]	27060.8	36051.8	35130.9	59991.3	66337.4	50322.6	40208.1	60002.2	46877.6	57033.2	26827.5	44613.2
33112581	cathepsin-L-like cysteine peptidase 02 [Tenebrio molitor]	245463	261061	213755	382505	375373	331835	389651	265795	292377	297370	244618	324003
762131990	PREDICTED: eukaryotic translation initiation factor 3 subunit C-like isoform X1 [Crassostrea gigas]	365670	371282	410370	333372	309938	354809	393149	298900	335702	380614	400044	341485
805818377	PREDICTED: 14-3-3 protein zeta isoform X2 [Megachile rotundata]	1.7283e+06	1.63584e+06	1.47888e+06	1.69167e+06	1.68817e+06	1.7317e+06	1.4717e+06	2.18233e+06	1.42285e+06	1.65482e+06	1.36175e+06	1.87964e+06
126697358	thioredoxin 2 [Haliotis discus discus]	259036	198185	227338	308585	316486	259615	215823	355675	254380	272543	198866	274228
443727184	hypothetical protein CAPTEDRAFT_154485 [Capitella teleta]	97491.5	96312.4	72823.4	130806	122952	142606	112610	135411	122750	111304	93811.1	87546.4
762139509	PREDICTED: 26S proteasome non-ATPase regulatory subunit 8-like [Crassostrea gigas]	332845	487464	394412	494405	434810	499781	452501	457569	453288	481124	397722	402784
762073540	PREDICTED: uncharacterized protein LOC105333086 [Crassostrea gigas]	2914.1	21712.5	16296.1	20873.2	20416.3	26374	17648.7	19181.1	22242.5	9957.37	21033.9	18542
O95319	CELF2_HUMAN CUGBP Elav-like family member 2 OS=Homo sapiens GN=CELF2 PE=1 SV=1	16101.6	98335.6	132338	121158	72318.4	107066	79608.9	91951.5	120268	37116.4	136075	82051.9
158187780	ribosomal protein rpl24 [Arenicola marina]	172642	216414	265906	163402	157517	145364	199310	148521	175417	184283	198514	214250
676421166	hypothetical protein LOTGIDRAFT_152054 [Lottia gigantea]	47823	103241	63236.6	116958	117757	108474	94712.9	102212	90957.9	111988	66917.5	89723.2
405951377	hypothetical protein CGI_10008895 [Crassostrea gigas]	49261.4	59866.5	40636.1	72105.3	68246.9	48948.5	54168.8	55980.7	53766.5	69873.7	48275	56316.7
571573480	PREDICTED: ATPase inhibitor mai-2, mitochondrial-like [Apis mellifera]	82606.3	85106.2	88062.5	185559	116106	122391	96447.5	133305	94111.6	123959	74409.6	155233
676480178	hypothetical protein LOTGIDRAFT_229230 [Lottia gigantea]	249938	351649	309687	482122	482188	391688	321781	467616	367234	449955	303858	348026
676467555	hypothetical protein LOTGIDRAFT_228742 [Lottia gigantea]	131926	112275	98571.7	156470	114952	144812	131772	112577	136390	97888.9	150950	126303
443717931	hypothetical protein CAPTEDRAFT_144687 [Capitella teleta]	27095.8	35727	25405	17784.1	27501.6	34739.6	30978.6	21204.7	29950.8	28090.7	28730.9	28572
762119885	PREDICTED: mitochondrial import inner membrane translocase subunit Tim16-like [Crassostrea gigas]	98465.2	78900	65213.8	104524	90621.2	85634.8	72665.3	109679	89440.4	108597	61198.9	79486.6
291243568	PREDICTED: dynein light chain roadblock-type 2-like [Saccoglossus kowalevskii]	95868.9	88348.6	90974.3	95136.8	99550.7	105446	80235.3	102476	101839	103922	86169.2	97816.8
403314481	ferritin [Sepiella maindroni]	2.53945e+06	4.01514e+06	1.4382e+06	2.85471e+06	3.16281e+06	4.16014e+06	3.29386e+06	3.72032e+06	2.87184e+06	3.19086e+06	2.38364e+06	2.61432e+06
524900062	PREDICTED: splicing factor 3B subunit 1-like isoform X1 [Aplysia californica]	14640.1	31888	6033.64	3247.97	40311.9	33456.9	7509.46	40803.1	18837.2	6058.35	34244.3	21437.8
524885351	PREDICTED: ribonuclease H1-like [Aplysia californica]	236729	183228	172498	205694	227164	210022	184883	226847	178188	219388	203407	215616
762101075	PREDICTED: uncharacterized protein LOC105332198 isoform X19 [Crassostrea gigas]	41315	37400	46726.7	7670.66	58782.4	2414.15	5399.84	51590.7	4967.96	27680.2	57541.9	46018.8
762108709	PREDICTED: sorting nexin-2-like [Crassostrea gigas]	567622	490236	421151	771676	720738	575823	512865	769728	599656	643288	421609	578812
762104945	PREDICTED: ras-interacting protein RIP3-like [Crassostrea gigas]	151264	99966.3	104073	197933	184538	149375	119751	165978	154469	171649	111836	157649
871269177	PREDICTED: maestro heat-like repeat-containing protein family member 1 isoform X3 [Aplysia californica]	38768.5	31804.6	29726.1	36953.6	45196.2	35273.9	43252.2	35840.2	17595	44016.3	32649.6	42880.3
762072590	PREDICTED: protein Mo25-like [Crassostrea gigas]	779681	676047	570612	1.1265e+06	1.07734e+06	892159	676093	1.0155e+06	847948	1.02285e+06	629948	893854
762131843	PREDICTED: large proline-rich protein BAG6-like isoform X1 [Crassostrea gigas]	126697	68638.8	80642.1	143950	145764	104561	86073.2	166006	108000	121670	109863	73906.7
676447304	hypothetical protein LOTGIDRAFT_208680 [Lottia gigantea]	17163	12519.5	16631.9	15799.4	14923	11422.8	18955.8	11066.7	15044.9	15175.2	10501.5	17036.4
762074405	PREDICTED: yolk ferritin-like isoform X2 [Crassostrea gigas]	55343.7	67858.3	53102	140864	139136	111230	79737.7	140258	72422.8	128059	67498.8	74597.8
485895560	Bcl-2-associated X protein [Mytilus galloprovincialis]	64437.3	52442.1	42340.1	61438.9	55410.8	60304.4	43160.9	68310.5	60333.5	62319.9	45576.8	53534.3
512130272	14-3-3 protein epsilon [Octopus bimaculoides]	5.41303e+06	7.03015e+06	7.11662e+06	7.76182e+06	6.86222e+06	9.27713e+06	7.81231e+06	7.45861e+06	6.05965e+06	7.6856e+06	6.72986e+06	7.30911e+06
524883290	PREDICTED: LOW QUALITY PROTEIN: clathrin interactor 1-like [Aplysia californica]	263217	182578	147162	329176	321512	257592	171776	361624	260939	279557	177898	235288
325297011	CaM kinase II alpha [Aplysia californica]	552117	463386	464736	411402	313617	496543	485821	334460	470783	476886	504906	402828
762124120	PREDICTED: spectrin beta chain-like isoform X2 [Crassostrea gigas]	2.27022e+06	2.55795e+06	2.66308e+06	2.00904e+06	1.97318e+06	2.56515e+06	2.54636e+06	1.7239e+06	2.39738e+06	2.43389e+06	2.41856e+06	2.37977e+06
295136547	Cu-Zn superoxide dismutase [Ostrea edulis]	1.71418e+06	1.44078e+06	1.35852e+06	2.32817e+06	2.02836e+06	1.79713e+06	1.50669e+06	2.2269e+06	1.70264e+06	1.73724e+06	1.45915e+06	1.9287e+06
762136417	PREDICTED: uncharacterized protein LOC105345135 isoform X1 [Crassostrea gigas]	694.608	20153.4	15907.6	31174	30254.5	7124.82	5276.13	27125	15718.5	21396.3	16894.8	17847
325303176	TPA_inf: alternative splicing factor ASF/SF2 [Amblyomma variegatum]	497320	682761	549574	302656	403905	378616	485677	505218	465339	454889	489776	384535
762139527	PREDICTED: phosphoribosylformylglycinamidine synthase-like isoform X1 [Crassostrea gigas]	18710.3	31655.4	31869.4	32745.7	23226	20917.1	24386.3	20689.2	27540.5	28905.5	26420.3	29439.2
762128218	PREDICTED: sorting nexin-6-like isoform X2 [Crassostrea gigas]	246053	227800	204015	218662	233547	224579	208606	258199	231274	264157	201691	175337
340742817	arginine kinase [Amphioctopus fangsiao]	209328	181925	190557	180772	168584	213981	176201	185237	207203	183353	183085	196231
871209276	PREDICTED: junctophilin-1-like [Aplysia californica]	67265	53447.3	37827.2	43784.3	45547.9	60698.6	49073.3	67659.2	47488.6	58363.8	39844.4	42388.7
762116336	PREDICTED: tyrosine 3-monooxygenase-like isoform X1 [Crassostrea gigas]	17020.9	22485	25807.8	9812.16	10648	16776.1	18252.1	8268.6	16730.5	15394	17632.2	25016.3
871209549	PREDICTED: chloride intracellular channel protein 5-like [Aplysia californica]	129775	87716.4	86210	167228	175766	128765	99760.3	142362	139822	145460	99988	138462
871234207	PREDICTED: putative adenosylhomocysteinase 3 [Aplysia californica]	204606	209675	219877	267914	270414	135701	212525	234804	190947	226346	244398	182107
328697856	PREDICTED: pyruvate dehydrogenase protein X component, mitochondrial-like [Acyrthosiphon pisum]	383514	315566	238450	310166	316965	268478	257694	386543	277755	331835	278834	276246
Q9H074	PAIP1_HUMAN Polyadenylate-binding protein-interacting protein 1 OS=Homo sapiens GN=PAIP1 PE=1 SV=1	110666	86842.8	91664	263719	71015.4	146388	77202.6	195504	74312.5	147922	145102	119257
871264387	PREDICTED: uncharacterized protein LOC101853496 isoform X12 [Aplysia californica]	299727	409109	453005	209705	210256	337584	343187	256867	279479	300475	399028	312586
676480714	hypothetical protein LOTGIDRAFT_154705 [Lottia gigantea]	21063.3	23148.5	29637.3	11968.1	10542.7	15848.8	30303.6	9628.24	24123.3	23346.3	13573.5	9606.24
762093210	PREDICTED: calmodulin-A-like isoform X2 [Crassostrea gigas]	33575.3	27029.3	25481.5	25439.9	28482.4	25099.6	22264.6	38616.6	20628	26639.5	18760.8	35754.2
405977619	B-cell receptor-associated protein 31 [Crassostrea gigas]	74834.7	121379	84987.4	99622.2	80744.1	92600.7	85852.5	74041	92865	118428	77680.9	96566
524902456	PREDICTED: uncharacterized protein LOC101858890 [Aplysia californica]	93681.4	123780	115221	109985	116991	131584	115211	90216.2	115928	116355	122637	119591
560948883	PREDICTED: adenylate kinase 2, mitochondrial isoform X1 [Vicugna pacos]	1.42634e+06	1.34773e+06	1.03282e+06	1.82998e+06	1.83908e+06	1.35898e+06	1.37737e+06	1.97304e+06	1.29838e+06	1.52618e+06	980884	1.53431e+06
512811479	PREDICTED: carbonic anhydrase 15 [Xenopus (Silurana) tropicalis]	1.07551e+06	595155	693209	1.22627e+06	1.13868e+06	1.38898e+06	941800	1.04429e+06	969815	986166	927565	1.1454e+06
405950758	cAMP-dependent protein kinase type II regulatory subunit [Crassostrea gigas]	222206	124448	118226	330400	224508	173705	190637	260165	173087	188836	130457	230233
676436206	hypothetical protein LOTGIDRAFT_225362 [Lottia gigantea]	506744	511517	525410	366661	584492	503106	443793	540414	463977	533130	449343	516534
762106823	PREDICTED: grpE protein homolog 1, mitochondrial-like isoform X1 [Crassostrea gigas]	98353.6	86166.8	102819	110968	121159	96323.6	100418	113782	98689.2	108279	78561.1	105450
676432059	hypothetical protein LOTGIDRAFT_156936 [Lottia gigantea]	204086	214239	174316	242085	188796	181313	214052	231418	163381	215721	158789	200304
762170780	PREDICTED: cullin-associated NEDD8-dissociated protein 1-like isoform X1 [Crassostrea gigas]	528526	640856	727460	657439	695816	698918	663309	611712	650042	675210	611135	665339
524864118	PREDICTED: sorting nexin-12-like [Aplysia californica]	686054	606118	527901	743397	660807	699519	636290	774258	622653	757318	498717	562529
676480681	hypothetical protein LOTGIDRAFT_229329 [Lottia gigantea]	61291.8	55943.3	53370.4	57641.6	59094.9	59840.1	45874.5	72288.4	57697.5	57811.1	51218.3	55771
212168881	S1 type peptidase [Octopus kaurna]	354970	499897	442219	321993	303423	422005	404149	380837	383595	305546	365041	460987
443686917	hypothetical protein CAPTEDRAFT_225499 [Capitella teleta]	312442	325367	337589	349134	385313	313500	318468	339907	352014	335828	300414	338421
762142717	PREDICTED: eukaryotic translation initiation factor 3 subunit H-like [Crassostrea gigas]	139960	149387	171979	149224	107192	144630	179809	121865	138774	157886	158895	88203.8
524864140	PREDICTED: metaxin-1-like [Aplysia californica]	10039.1	7833.8	3479.05	10708.3	6307.81	10903.1	3139.96	9541.13	11180.8	7680.76	9669.01	7009.32
762097046	PREDICTED: U6 snRNA-associated Sm-like protein LSm2 [Crassostrea gigas]	27623.4	17875.5	24498.3	4991.81	16689.1	12579.6	23291.1	11251.2	13978.7	27809.9	23831.8	1824.22
568267013	ribosomal protein L37e [Necator americanus]	72271.2	47195.3	51350.8	41184.4	29735.2	24243	48356.4	29573.8	40274.8	35646.9	54713.2	51539.4
14537667	AF322410_1 calexcitin B [Doryteuthis pealeii]	1.91927e+06	2.34127e+06	1.8854e+06	2.54834e+06	2.54542e+06	2.54848e+06	2.15234e+06	2.67377e+06	2.205e+06	2.2697e+06	1.9562e+06	2.2235e+06
524872174	PREDICTED: GPI mannosyltransferase 4-like isoform X2 [Aplysia californica]	46982.9	58672.7	35436.4	26229.7	26076.4	46585.5	26138.4	31807.4	43459.6	37226.7	54077.2	41917
443686443	hypothetical protein CAPTEDRAFT_175992 [Capitella teleta]	576520	681913	806371	494413	478536	634593	646500	489939	622255	491321	709469	629519
405962751	RNA-binding protein 8A [Crassostrea gigas]	39124.4	40394	49158.2	33229.8	35589.7	44768.9	36850.4	43893.3	36412.2	44198.9	36967.8	38174.4
632986886	PREDICTED: SUMO-activating enzyme subunit 1 [Callorhinchus milii]	128621	130023	133820	113692	125174	136016	123479	120265	114403	132387	122412	135895
212168866	S1 type peptidase [Octopus kaurna]	572734	1.08039e+06	933734	390868	543115	906056	802056	872700	624850	768932	563243	685098
676489036	hypothetical protein LOTGIDRAFT_176120, partial [Lottia gigantea]	135420	127042	185139	85823.4	82856.9	95675.5	187317	53237.3	99719.6	92836.6	148500	112545
405970416	Titin [Crassostrea gigas]	100231	110772	109081	60790.6	73895.7	75288.3	112826	55938.1	77350.7	82977.2	101909	85644.8
557760247	PREDICTED: 60S ribosomal protein L10a-2 [Musca domestica]	998726	1.0573e+06	1.02548e+06	970903	902535	911203	1.15613e+06	860109	946345	994335	935661	824735
405951524	Zinc finger protein ZPR1 [Crassostrea gigas]	134139	108796	143354	124785	141345	134312	110768	112422	138435	130827	114692	159088
676444223	hypothetical protein LOTGIDRAFT_158663 [Lottia gigantea]	76781.4	76614.8	77030.2	101453	100866	70443	78267.5	80088.4	81018.8	78039.7	86687.8	85922.9
762096490	PREDICTED: probable pterin-4-alpha-carbinolamine dehydratase [Crassostrea gigas]	212601	293492	202522	244920	238581	238328	231183	297050	192241	249320	205831	217002
524871172	PREDICTED: 26S proteasome non-ATPase regulatory subunit 11-like [Aplysia californica]	933938	859056	824698	952583	850918	891288	779749	927942	797238	1.03592e+06	770545	857443
734609751	PREDICTED: maleylacetoacetate isomerase isoform X1 [Larimichthys crocea]	907487	677634	633428	1.19756e+06	1.15221e+06	903577	794958	1.20662e+06	749267	971074	687285	912112
762146530	PREDICTED: protein BCCIP homolog [Crassostrea gigas]	114391	79864.9	111974	78870	133186	98228.9	100627	106771	79884.5	116329	95334.7	100491
443733114	hypothetical protein CAPTEDRAFT_226009 [Capitella teleta]	808205	748481	688738	828112	739294	884040	745174	773531	763978	817041	625158	839901
676433711	hypothetical protein LOTGIDRAFT_199820 [Lottia gigantea]	264416	300203	343842	252671	214120	204095	277019	224820	248923	263198	269771	251043
762138943	PREDICTED: basic leucine zipper and W2 domain-containing protein 1-like [Crassostrea gigas]	781844	962304	866189	1.3618e+06	1.26652e+06	1.16447e+06	1.00869e+06	1.02188e+06	1.02321e+06	1.23053e+06	896495	1.03406e+06
676485347	hypothetical protein LOTGIDRAFT_154876 [Lottia gigantea]	205585	208320	127650	256658	252174	209638	181755	294424	198158	198645	165017	184966
212168866	S1 type peptidase [Octopus kaurna]	400045	396848	430964	334985	391518	435025	435652	478425	237355	435723	234144	497456
260831011	hypothetical protein BRAFLDRAFT_124267 [Branchiostoma floridae]	230034	89842.8	113577	307505	330194	256274	138161	221755	240584	269104	162379	256062
646690477	NADH dehydrogenase [ubiquinone] 1 beta subcomplex subunit 8, mitochondrial [Zootermopsis nevadensis]	759510	746144	669927	786174	812191	830553	722486	849536	726939	784019	683251	701153
443705726	hypothetical protein CAPTEDRAFT_154247 [Capitella teleta]	2.69793e+06	2.74185e+06	2.56875e+06	3.52497e+06	3.36416e+06	2.63419e+06	2.4246e+06	3.38812e+06	2.67766e+06	3.072e+06	2.37947e+06	3.06616e+06
524913816	PREDICTED: heterogeneous nuclear ribonucleoprotein A1-like isoform X1 [Aplysia californica]	385318	531484	454705	567698	568285	532587	450616	607479	478354	523886	407062	480603
675369805	Laminin subunit alpha-2, partial [Stegodyphus mimosarum]	4.4285e+06	4.31651e+06	4.22587e+06	6.69376e+06	6.41192e+06	3.5817e+06	4.87395e+06	5.86245e+06	3.31737e+06	5.7719e+06	2.44516e+06	6.48803e+06
871223175	PREDICTED: programmed cell death 6-interacting protein-like [Aplysia californica]	513996	488531	463152	814915	631965	739271	565081	555392	638736	722211	484641	574374
524871580	PREDICTED: dynactin subunit 4-like [Aplysia californica]	11568.4	1466.43	14894.9	13732.5	5713.41	2639.84	5431.97	5747.7	4917.21	7628.7	11192.2	13566.5
762161704	PREDICTED: Na(+)/H(+) exchange regulatory cofactor NHE-RF2-like isoform X1 [Crassostrea gigas]	176822	141661	122820	223878	251502	177096	138998	234982	175544	200836	127555	182267
762137947	PREDICTED: translocon-associated protein subunit gamma-like [Crassostrea gigas]	34147.6	22278.6	9304.25	28738.1	20376.5	23591.5	28141.3	24046.6	21115.4	15041.1	29303.7	16530.5
762090241	PREDICTED: serine/arginine-rich splicing factor 7-like [Crassostrea gigas]	418062	414601	351566	139711	303985	222271	330346	284338	277794	278306	307862	312380
405954086	Severin [Crassostrea gigas]	183498	106535	103559	315470	247147	191271	127158	232088	218046	183740	150476	199174
762104895	PREDICTED: ER membrane protein complex subunit 2-like [Crassostrea gigas]	58301.5	79864.4	66707	95648.2	62061.5	78836.4	67185.7	80242.1	70572.8	77001.5	66346.8	65809.1
699662703	PREDICTED: S-adenosylmethionine synthase isoform type-1 [Charadrius vociferus]	768562	728179	699688	818260	819347	994184	822331	569814	849534	685528	789834	953597
229367928	Glutaredoxin-2, mitochondrial precursor [Anoplopoma fimbria]	32789.8	27889.2	20479.1	21847.4	21667.8	5567.06	17681.8	31578.7	13877.4	14901.8	23940	24002.7
762134015	PREDICTED: calmodulin-like [Crassostrea gigas]	154322	151007	142563	169513	148793	148863	125847	196869	130723	176752	102595	152037
524866627	PREDICTED: putative hydroxypyruvate isomerase [Aplysia californica]	34508.9	32724.6	53265.8	42563.2	36211.5	67801.4	35259.7	39336.7	78410.2	10303.2	63134.9	31788.4
19879404	non-muscle myosin II heavy chain [Doryteuthis pealeii]	29599.3	19754.7	20596.5	37045.6	28464.9	29375.5	30849.6	19502.7	29374.7	23778	29011.3	26850.7
762162392	PREDICTED: homer protein homolog 2-like isoform X9 [Crassostrea gigas]	3371.21	10320.9	12492.5	16510.4	14760.9	16806.6	10944.8	14427.8	12177.5	13821.8	8165.01	12239.4
405953669	UDP-glucose 6-dehydrogenase [Crassostrea gigas]	9528.01	23135.7	30675.6	31961.5	19461.3	27924.1	23246	15123.6	25003.4	29092.1	22381.2	23049
827883547	glutathione S-transferase 1 [Idiosepius paradoxus]	74616.1	66829	50243.7	83840.2	88254.2	93915.5	62611.7	83199.4	69122.6	97135.7	57184.2	72895.3
524912919	PREDICTED: 26S protease regulatory subunit 7 [Aplysia californica]	793305	760805	917923	805664	700121	760844	781015	623044	748410	782889	812483	829271
56756450	SJCHGC01894 protein [Schistosoma japonicum]	36108.5	87273.4	77991.4	81702	84892.6	69651.1	68575.2	71801.9	65621.4	67379.5	58965.9	90241.1
676491985	hypothetical protein LOTGIDRAFT_133243 [Lottia gigantea]	305352	414126	363274	518834	396353	435317	408915	415714	395316	449190	357791	322606
762085868	PREDICTED: carboxypeptidase B-like [Crassostrea gigas]	11398.3	29678.7	29688.1	19526	16959.6	22876.4	38376.5	8321.39	16278.5	28891.9	12808	20960.9
676474381	hypothetical protein LOTGIDRAFT_106733 [Lottia gigantea]	37552.3	16231.4	28932.6	41939.5	28294.5	12919.2	18651.6	46737.5	20812.5	27151.6	23062.8	23710.7
13096244	A Chain A, Crystal Structure Analysis Of Neuronal Sec1 From The Squid L. Pealei	292950	327820	312420	254507	230400	282204	322115	191729	277082	268914	288737	292734
762091034	PREDICTED: ribosome maturation protein SBDS-like [Crassostrea gigas]	103634	79208.6	56868.1	108763	101505	99688.9	77635.7	99503.3	87542.3	115615	67754.8	82345.7
524906359	PREDICTED: flotillin-2a-like [Aplysia californica]	438999	475434	492664	660693	659904	514849	481411	582992	514038	611642	427567	510353
375073699	ribosomal protein L39, partial [Ostrea edulis]	48568.7	117836	144084	139389	154867	75005.1	105983	124689	105514	109568	113735	96219.3
229891605	RSSA_PINFU RecName: Full=40S ribosomal protein SA [Pinctada fucata]	3.04911e+06	3.5976e+06	3.15972e+06	2.77217e+06	2.77034e+06	3.09381e+06	3.40449e+06	2.63809e+06	2.783e+06	3.3086e+06	2.91078e+06	2.73658e+06
676447469	hypothetical protein LOTGIDRAFT_208735 [Lottia gigantea]	347458	304679	338679	144464	172481	234922	287257	188952	214027	212495	352511	231981
557020509	PREDICTED: armadillo repeat-containing protein 8 isoform X3 [Latimeria chalumnae]	92678.1	75780.8	93390.7	71638.3	61858.4	80485.8	80619.9	67274	75746.8	91400.8	83536.7	59671.6
4506685	40S ribosomal protein S13 [Homo sapiens]	377658	382404	360460	256656	265206	257732	326030	324081	271496	304995	287815	315222
676471070	hypothetical protein LOTGIDRAFT_233865 [Lottia gigantea]	436929	360196	299801	148138	408227	392999	294586	392996	308752	350665	267356	355713
Q5R7J6	UBE2N_PONAB Ubiquitin-conjugating enzyme E2 N OS=Pongo abelii GN=UBE2N PE=2 SV=1	368201	522239	540504	621757	623172	704487	475858	613832	588816	518710	513550	543106
762113592	PREDICTED: eukaryotic translation initiation factor 3 subunit K-like [Crassostrea gigas]	448915	496908	546939	599859	471734	623477	581356	521670	470691	651313	383457	459824
291230460	PREDICTED: cofilin-like [Saccoglossus kowalevskii]	312705	406193	436525	620652	636045	640598	381898	567562	582778	428874	411988	564491
405963667	Hook-like protein 3 [Crassostrea gigas]	26472.9	20435.4	21292.4	3025.17	31473.6	22479.6	14676.9	28070.7	17938	22812.8	17303.9	19581.6
676460036	hypothetical protein LOTGIDRAFT_105182 [Lottia gigantea]	13599.2	18589.7	18180.7	26426.6	26199	21818.2	19199.4	22428.9	19507.2	22032.2	16156.5	20695.5
524874186	PREDICTED: nucleolin-like [Aplysia californica]	523463	558503	603374	519576	557080	451644	509759	635138	487089	556571	458005	442370
543244337	PREDICTED: long-chain-fatty-acid--CoA ligase 1 [Geospiza fortis]	138193	116164	132148	241115	231204	190355	143807	169596	178282	187724	134534	194111
762087603	PREDICTED: vinculin-like isoform X5 [Crassostrea gigas]	931014	937312	1.01527e+06	857144	984393	824744	873641	971191	851793	795086	905170	934806
676449098	hypothetical protein LOTGIDRAFT_231541 [Lottia gigantea]	326.251	4196.32	941.015	11814.6	10732	12038.1	5606.25	7721.14	5920.96	7501.05	7478.91	4244.7
762147927	PREDICTED: PDZ and LIM domain protein Zasp-like isoform X2 [Crassostrea gigas]	618734	483837	418469	617598	589036	515041	462626	598024	517844	559811	460738	515958
405963797	Eukaryotic translation initiation factor 2 subunit 2 [Crassostrea gigas]	624908	623656	637196	607522	580913	616914	583323	684643	630226	632070	526169	488463
762133947	PREDICTED: neuroplastin-like isoform X3 [Crassostrea gigas]	689439	682137	589505	568936	639471	692813	635975	631822	531366	625093	633921	650882
543382508	PREDICTED: 40S ribosomal protein S5-like, partial [Pseudopodoces humilis]	439383	408566	453959	482274	428478	457687	418597	406914	434557	546183	333786	421468
780112830	PREDICTED: uncharacterized protein LOC584238 isoform X2 [Strongylocentrotus purpuratus]	70840.8	48015.3	53894.7	57932.6	55081.1	67111.2	45218.2	61185.3	53764.4	54055.2	52774.9	71411.5
871213807	PREDICTED: piezo-type mechanosensitive ion channel component 1-like [Aplysia californica]	104250	101578	136059	108451	66047.6	108641	77563.7	89034.8	97496.5	106444	130680	97684.6
668460958	AGAP005858-PA-like protein [Anopheles sinensis]	161519	81430.2	75230.3	234366	230051	155874	113093	208822	156888	142343	107227	169860
675369149	Eukaryotic initiation factor 4A-II, partial [Stegodyphus mimosarum]	687509	641204	860179	1.17472e+06	1.1353e+06	765986	901027	610387	896779	771487	894267	964243
676496132	hypothetical protein LOTGIDRAFT_237103 [Lottia gigantea]	124718	130016	138801	125127	152560	159176	116285	140759	148158	105717	124454	159167
676462645	hypothetical protein LOTGIDRAFT_232861 [Lottia gigantea]	10026	5744.08	3722.28	10143.4	10766.2	9018.23	2329.37	14588.3	7790.62	8069.84	8033.74	6448.21
22203734	small nuclear ribonucleoprotein D2-like protein [Azumapecten farreri]	130165	166989	113698	114134	108829	120375	108137	152251	117707	152176	93660.3	97201.9
524916987	PREDICTED: polyadenylate-binding protein 4-like isoform X1 [Aplysia californica]	940969	1.39696e+06	1.35665e+06	2.07813e+06	1.78958e+06	1.29062e+06	1.33596e+06	1.64778e+06	1.28177e+06	1.49437e+06	1.19789e+06	1.50565e+06
617499191	PREDICTED: uncharacterized protein LOC103129385 isoform X2 [Poecilia formosa]	335453	374006	357724	338132	276090	489352	405998	334113	334668	305420	382535	312140
762100293	PREDICTED: rootletin-like isoform X6 [Crassostrea gigas]	122224	90874.7	64381.6	114328	118248	88820.6	79628.2	119479	97236	115537	77126	82854.1
564254745	PREDICTED: SH3 domain-containing kinase-binding protein 1 [Alligator mississippiensis]	190193	224725	199785	255455	259954	240340	162882	281791	240666	207865	182788	232558
212168851	S1 type peptidase [Hapalochlaena maculosa]	298908	366173	452047	147528	178092	265675	332956	261026	181088	233532	324773	297783
443694865	hypothetical protein CAPTEDRAFT_176110 [Capitella teleta]	1.18367e+06	915732	909548	1.57084e+06	1.49472e+06	1.24468e+06	926136	1.47198e+06	1.19116e+06	1.25641e+06	874183	1.25656e+06
762170369	PREDICTED: programmed cell death protein 4-like [Crassostrea gigas]	42891.8	40337.6	40708.2	66830.9	66834.9	64702.3	43345.6	52490.1	49489.2	64798.6	38541.1	58508.3
871225927	PREDICTED: plexin-B1-like [Aplysia californica]	158987	200723	221088	108829	156743	183618	162617	137937	142248	150706	209627	178448
389565944	calmodulin [Mnemiopsis leidyi]	590600	378837	263738	1.05341e+06	740591	481571	440309	789670	460375	705975	409918	537047
Q7Z6Z7	HUWE1_HUMAN E3 ubiquitin-protein ligase HUWE1 OS=Homo sapiens GN=HUWE1 PE=1 SV=3	1163.35	8452.2	11567	20987.1	20790.7	14965.7	9807.05	17489.1	16516.4	543.727	11904.6	17980.4
871216543	PREDICTED: 7-methylguanosine phosphate-specific 5'-nucleotidase A-like isoform X2 [Aplysia californica]	112671	135011	113463	132935	135173	109254	118653	107392	111647	147085	97000.4	121115
676478073	hypothetical protein LOTGIDRAFT_166024 [Lottia gigantea]	4826.06	437.108	4831.66	3929.79	5904.5	6352.24	5757.93	4087.87	4489.59	821.178	4654.45	5200.48
762114172	PREDICTED: calpain-B-like isoform X8 [Crassostrea gigas]	883281	685656	729966	1.16453e+06	926433	1.05035e+06	793377	665706	906678	894398	886013	1.02592e+06
871220928	PREDICTED: solute carrier family 12 member 4-like [Aplysia californica]	161341	137816	186516	128747	151007	130085	146760	123053	136342	170480	125805	148207
160347070	ribosomal protein S9 [Haliotis discus discus]	2.80992e+06	3.17425e+06	2.5124e+06	2.35875e+06	2.48602e+06	2.49261e+06	2.55176e+06	2.7492e+06	2.52864e+06	3.24439e+06	2.00736e+06	1.95671e+06
166952371	ribosomal protein rps19 [Lineus viridis]	1.69467e+06	1.51483e+06	1.78454e+06	1.77423e+06	1.86916e+06	1.85769e+06	1.28883e+06	2.3039e+06	1.63123e+06	1.91798e+06	1.40483e+06	1.41595e+06
55736031	fed tick salivary protein 8 [Ixodes scapularis]	45935.8	177684	131529	167723	168005	167692	122168	170905	122520	180128	104003	115074
700589054	hypothetical protein [Phragmatopoma lapidosa]	592928	784946	547713	878189	871851	704095	586242	1.15226e+06	660970	663601	535574	556087
762137042	PREDICTED: 60S ribosomal protein L22-like [Crassostrea gigas]	328719	299833	303800	289207	278519	264783	306733	245632	277521	343360	217208	282509
762089511	PREDICTED: uncharacterized protein LOC105328058 isoform X2 [Crassostrea gigas]	256302	233952	248826	272306	260390	227856	285743	162656	232371	273269	232296	235170
762137544	PREDICTED: apolipophorins-like [Crassostrea gigas]	958520	1.19869e+06	1.4205e+06	457597	459952	838455	1.05064e+06	460413	765554	808625	1.11836e+06	851552
405960626	Interleukin enhancer-binding factor 2-like protein [Crassostrea gigas]	33968.5	37838.9	81601.2	26997.3	27629.5	33270.1	26262.6	23524.8	23677.2	48138.1	77653.9	29211.9
296531427	mitochondrial intermembrane space import and assembly protein 40 [Saccoglossus kowalevskii]	75578.8	63832.8	60469.7	78345.8	89247	57960.9	57934.9	93144	65080.4	67611.4	55104.6	63845.1
443690544	hypothetical protein CAPTEDRAFT_90948 [Capitella teleta]	49382.1	39617.3	34103.3	65102	49016.8	46152	37201.9	48426.8	41951.6	57157.8	36657.1	46846.2
1947092	Na/Ca exchanger [Doryteuthis opalescens]	1.11545e+06	1.28685e+06	1.54828e+06	707996	730524	1.09323e+06	1.1219e+06	594244	1.05111e+06	866208	1.4417e+06	1.05879e+06
218683627	heat shock protein 60 [Biomphalaria glabrata]	3.12659e+06	2.78573e+06	2.72202e+06	3.00001e+06	3.02686e+06	2.49432e+06	2.61935e+06	3.28279e+06	2.72528e+06	2.73269e+06	2.11059e+06	2.75576e+06
762145041	PREDICTED: glia maturation factor beta-like [Crassostrea gigas]	36072.5	30088.7	25867.7	38080.5	42214.5	38772.5	30686.8	34029.7	32217.9	39362	28814.8	34540.6
762089511	PREDICTED: uncharacterized protein LOC105328058 isoform X2 [Crassostrea gigas]	162444	145985	138586	195955	232599	169803	199167	114037	158377	194078	156594	166191
662213291	PREDICTED: synaptobrevin homolog YKT6 isoform X1 [Diaphorina citri]	73705.7	60371.5	58449.9	81369.3	75931.8	73744	64671.2	66058.2	66792.4	75909	61451.9	65584.9
524887886	PREDICTED: EF-hand domain-containing protein D2-like [Aplysia californica]	323685	389882	275593	697711	655279	439951	297302	673917	400291	583253	225246	450128
528501148	PREDICTED: heterogeneous nuclear ribonucleoprotein L2 isoform X2 [Danio rerio]	19597.5	28142.6	33698.7	28725	35037.8	25835.6	26077.4	24900.4	27728.9	24660.9	30718	27580.6
747850	SNAP-type protein [Doryteuthis pealeii]	571502	555292	462181	781062	723868	717155	574003	661590	580940	695801	522073	567809
762130032	PREDICTED: vesicle transport through interaction with t-SNAREs homolog 1B-like [Crassostrea gigas]	62173.5	49895.4	47464	101914	91413.7	60070.2	59022.5	90325.4	49318.5	67554.1	52779	71254.3
762090022	PREDICTED: T-complex protein 1 subunit alpha-like [Crassostrea gigas]	2.1108e+06	2.21834e+06	2.39999e+06	2.06913e+06	2.05121e+06	1.91069e+06	2.09927e+06	1.87242e+06	1.93377e+06	2.28182e+06	1.78046e+06	2.08972e+06
1346953	RALB_TODPA RecName: Full=Retinal-binding protein; Short=RALBP [Todarodes pacificus]	2.12447e+06	2.24534e+06	1.90839e+06	2.14707e+06	2.30827e+06	2.74399e+06	1.91926e+06	2.21878e+06	2.14483e+06	1.95561e+06	1.87003e+06	2.62342e+06
871252597	PREDICTED: twitchin-like [Aplysia californica]	835586	1.22346e+06	1.71512e+06	217632	387874	742029	954837	351074	807685	628864	1.24723e+06	848298
768195827	core histone H2A/H2B/H3/H4 [Dictyocaulus viviparus]	1.20467e+07	1.26773e+07	8.69148e+06	9.87594e+06	8.86623e+06	1.08096e+07	1.04669e+07	1.14774e+07	1.00352e+07	1.14414e+07	8.63335e+06	7.38847e+06
762168007	PREDICTED: translational activator GCN1-like [Crassostrea gigas]	64231.9	62992.8	77650	79158.3	73727.9	61684.9	60475.2	57919.7	69400.8	61679.6	64011.4	82159.8
524867466	PREDICTED: N-terminal EF-hand calcium-binding protein 1-like [Aplysia californica]	119338	118982	112827	138870	135293	130093	109859	146115	108692	109166	119044	118749
831556434	PREDICTED: cytochrome b-c1 complex subunit 10-like [Fundulus heteroclitus]	118689	135258	120986	306709	170898	66568.4	242782	245392	46765.2	84116.3	34637.9	211792
762129500	PREDICTED: T-complex protein 1 subunit gamma-like [Crassostrea gigas]	1.78384e+06	1.86244e+06	2.12867e+06	1.87037e+06	1.94193e+06	1.89542e+06	1.85075e+06	1.58833e+06	1.87575e+06	1.75627e+06	1.75673e+06	1.98157e+06
762130640	PREDICTED: 26S protease regulatory subunit 10B [Crassostrea gigas]	658633	596965	629998	725201	636531	635685	548756	725567	588073	659358	533761	599192
188572393	putative 40S ribosomal protein RPS14 [Novocrania anomala]	771890	585596	738820	523940	410893	437225	568474	631203	522770	533527	492553	514893
676489036	hypothetical protein LOTGIDRAFT_176120, partial [Lottia gigantea]	208066	221272	294212	102534	69979.3	159305	231575	124549	142606	109019	231975	153244
762110702	PREDICTED: neuronal calcium sensor 1-like [Crassostrea gigas]	314705	283591	299297	463742	443456	340300	259735	416797	321110	387796	266720	365639
340369254	PREDICTED: thioredoxin-like [Amphimedon queenslandica]	407291	24192.8	22460.9	422570	395727	42182.9	50809.5	530375	278673	277677	24152.6	74103.8
871259309	PREDICTED: serine/arginine-rich splicing factor 10-like isoform X1 [Aplysia californica]	116487	262074	235781	207521	235920	156093	189638	243666	160428	209486	149397	187238
405974166	Titin [Crassostrea gigas]	645803	674580	926406	250938	296921	542809	595525	232298	558761	393062	810207	542834
871257457	PREDICTED: protein PRRC2C-like isoform X3 [Aplysia californica]	57448.6	51862.1	63340.5	84124.3	77854.4	50233.8	43444.1	89730.9	52580.5	75354	45861	54059.3
741893281	PREDICTED: tubulin alpha-3 chain isoform X1 [Bos taurus]	757793	819036	977093	683555	775761	737829	704003	684414	733104	717166	743521	871184
158187844	ribosomal protein rps21 [Eurythoe complanata]	574660	446071	407263	394157	432805	373362	411637	501085	385807	377711	382147	403863
676472442	hypothetical protein LOTGIDRAFT_218488 [Lottia gigantea]	421690	404838	583902	492522	500573	482337	468640	370813	460557	380466	497061	525888
223646550	60S ribosomal protein L38 [Salmo salar]	827928	1.15023e+06	1.07367e+06	930741	847507	811116	957238	1.17527e+06	766224	996620	602261	786727
676429703	hypothetical protein LOTGIDRAFT_224237 [Lottia gigantea]	33226.8	38806.5	44766.8	30099.6	25885.6	37517.1	27187.7	18869.8	41791.2	29707.9	44553.6	34759.8
871274397	PREDICTED: titin-like [Aplysia californica]	216243	270413	347988	83500.4	135883	209503	239299	96941.8	198687	163887	264875	219029
1174499	SYB_DORPE RecName: Full=Synaptobrevin [Doryteuthis pealeii]	356776	395145	325951	422357	392629	358807	390368	462317	285888	328740	297239	342349
871237452	PREDICTED: dnaJ homolog subfamily C member 7-like [Aplysia californica]	106751	97209.7	92287.4	128016	106663	90644.8	80686.7	107699	87353.3	124330	90282.1	91231.1
871259533	PREDICTED: glutamate receptor ionotropic, kainate 4-like [Aplysia californica]	310369	660338	685253	170652	350464	606222	530331	315230	396217	318012	494538	548501
762132877	PREDICTED: serine/threonine-protein phosphatase 2A 65 kDa regulatory subunit A alpha isoform-like isoform X2 [Crassostrea gigas]	399940	432499	431580	435797	445142	465225	422716	422763	389676	438414	338449	428777
762142963	PREDICTED: adenosine kinase 1-like isoform X2 [Crassostrea gigas]	166010	103299	116095	200302	172512	164339	119615	159997	173103	115317	135729	158651
762157778	PREDICTED: nucleolysin TIAR-like isoform X3 [Crassostrea gigas]	180583	199956	228418	154513	141635	147764	174371	132880	174386	158572	182275	160754
675871688	hypothetical protein HELRODRAFT_185768 [Helobdella robusta]	573263	537258	567063	462443	558559	485428	557368	434007	495123	489779	460193	536595
676449189	hypothetical protein LOTGIDRAFT_231565 [Lottia gigantea]	1.24589e+06	1.83682e+06	1.91657e+06	1.90804e+06	1.73746e+06	1.74599e+06	1.71447e+06	1.68678e+06	1.62629e+06	1.74191e+06	1.58192e+06	1.33999e+06
762123487	PREDICTED: malignant T-cell-amplified sequence 1-like, partial [Crassostrea gigas]	37280.2	82426.8	87211.4	64692.8	82847.7	86277.4	95610.7	38028.5	79934.1	43610	67026	86603.4
762100639	PREDICTED: peptidyl-tRNA hydrolase 2, mitochondrial-like [Crassostrea gigas]	148829	120658	114588	155388	144152	149632	131342	139345	127221	147260	107402	123847
676461141	hypothetical protein LOTGIDRAFT_202558 [Lottia gigantea]	22511.5	27090	20739.1	17802.6	5282.35	18381	17566.7	17426.2	17839.5	19733.3	13698.3	17911
512130272	14-3-3 protein epsilon [Octopus bimaculoides]	2.17563e+06	2.03437e+06	1.77818e+06	2.38331e+06	2.05456e+06	2.32577e+06	1.82153e+06	2.52281e+06	1.88858e+06	2.21821e+06	1.69225e+06	1.73557e+06
611998318	PREDICTED: arginase-1 [Monodelphis domestica]	809341	733527	740889	1.20441e+06	1.13361e+06	1.28108e+06	705201	931997	957912	1.11647e+06	783788	1.00273e+06
675377989	Heterogeneous nuclear ribonucleoprotein A1, A2/B1-like protein, partial [Stegodyphus mimosarum]	388313	404877	444239	320778	304462	413840	369117	331171	358275	323356	378572	356212
556982123	PREDICTED: nucleolin-like isoform X1 [Latimeria chalumnae]	1.43477e+06	1.16734e+06	1.30069e+06	851871	960273	793743	1.02263e+06	1.14462e+06	940719	902377	1.07199e+06	967774
573894497	PREDICTED: regulator of G-protein signaling 4-like [Lepisosteus oculatus]	492005	476987	310365	558978	583830	559979	356097	646867	423277	569959	302707	472652
260828857	hypothetical protein BRAFLDRAFT_86470 [Branchiostoma floridae]	28694.7	29190.5	37763.2	19871.2	18279	35794.1	36193.4	18632.1	30219.6	31228.5	39156	2168.99
676428397	hypothetical protein LOTGIDRAFT_110138, partial [Lottia gigantea]	184951	178773	182671	258592	192940	185456	188087	238574	170690	172492	162299	166824
871221501	PREDICTED: trafficking protein particle complex subunit 3-like [Aplysia californica]	207005	191138	143537	168807	173928	177279	156687	183158	155964	205642	122677	161783
871277588	PREDICTED: synaptosomal-associated protein 29-like [Aplysia californica]	27872.3	33163.2	9601.51	45728.7	42921.7	15639.2	27835.9	41709.1	32228.3	28001.6	11284.7	21297.5
762125304	PREDICTED: FACT complex subunit SPT16-like [Crassostrea gigas]	45195.6	67054.7	63709.8	22422.6	14664	50586.9	34869.8	20063	23364.7	27526.5	82147.2	56396.3
762117909	PREDICTED: 26S proteasome non-ATPase regulatory subunit 12-like [Crassostrea gigas]	312235	296801	233129	320477	209311	327766	315438	217005	228215	330547	286471	197523
524903041	PREDICTED: EH domain-containing protein 3-like [Aplysia californica]	213783	243130	212738	291804	296821	273826	228770	295914	223492	253357	193842	224338
22758870	ribosomal protein S17 [Argopecten irradians]	549100	593117	562654	590617	602275	563892	490517	648737	494538	562302	497923	512357
676466800	hypothetical protein LOTGIDRAFT_122165, partial [Lottia gigantea]	312306	239535	193682	433933	432372	313356	230466	412087	292891	326808	234300	286190
524911302	PREDICTED: eukaryotic translation initiation factor 3 subunit M-like [Aplysia californica]	333412	455832	378119	542026	439680	466564	417710	394371	396835	508509	324332	379697
524871774	PREDICTED: NADH dehydrogenase [ubiquinone] flavoprotein 2, mitochondrial-like [Aplysia californica]	276424	286415	285869	336710	332589	326427	263446	331448	292633	255529	271135	292240
871252168	PREDICTED: zinc metalloproteinase nas-15-like [Aplysia californica]	43936.1	41479.6	38055.2	56154.5	51296.5	35211.8	28296.6	56196.1	37315.6	53682.8	31479.1	39204.3
675870486	hypothetical protein HELRODRAFT_192372 [Helobdella robusta]	189170	79298.2	77809.9	74964.1	61244.4	104763	94669.5	99548	101027	100213	67253.2	80480
762101230	PREDICTED: T-complex protein 1 subunit eta-like isoform X1 [Crassostrea gigas]	1.35228e+06	1.6933e+06	1.86365e+06	2.15143e+06	1.94611e+06	1.80629e+06	1.68448e+06	1.73303e+06	1.70764e+06	1.61105e+06	1.55757e+06	1.70318e+06
223646392	40S ribosomal protein S28 [Salmo salar]	1.23996e+06	1.30452e+06	1.24716e+06	884592	815731	858575	941707	1.21106e+06	928007	1.08218e+06	738413	969855
762091073	PREDICTED: proteasome subunit alpha type-7-like [Crassostrea gigas]	524081	518385	539931	486719	475906	543565	512142	419784	442630	492411	490189	496373
223646692	26S protease regulatory subunit 4 [Salmo salar]	829762	859833	818087	1.11059e+06	995653	907592	831468	979912	804626	931228	648322	902405
676476993	hypothetical protein LOTGIDRAFT_219325 [Lottia gigantea]	48323.5	71877.5	62403.5	80781.3	73396.9	75083.4	54482.5	68391.5	72431.9	52271.1	69870.9	62097.3
762080651	PREDICTED: zonadhesin-like isoform X3 [Crassostrea gigas]	26008	30586.7	16293	148319	105391	76507.7	24308.9	102126	36386.8	49159.3	65340.3	94080.1
P91910	TBA3_CAEEL Tubulin alpha-3 chain OS=Caenorhabditis elegans GN=mec-12 PE=1 SV=1	955991	1.03929e+06	1.11646e+06	724734	837215	815850	944357	711281	764935	798186	921619	916622
762164111	PREDICTED: E3 SUMO-protein ligase RanBP2-like [Crassostrea gigas]	31847.8	28025.3	33772.5	39929.2	34094.9	37774.9	22423.5	35060.1	35379.3	33536.7	29737.3	33077.1
O96952	THIO_GEOCY Thioredoxin OS=Geodia cydonium GN=THIO PE=3 SV=1	261867	635998	527608	729242	723688	608691	597648	628313	341406	424540	531273	687289
524887319	PREDICTED: dnaJ homolog subfamily B member 11-like [Aplysia californica]	43037.7	41914.8	38277.3	47472.2	50385.3	38092.6	36702	41559.9	40704.5	43873.8	32473.5	43261.5
676441940	hypothetical protein LOTGIDRAFT_238761 [Lottia gigantea]	3.09271e+06	2.41206e+06	1.36593e+06	2.1883e+06	2.60896e+06	2.41704e+06	2.66961e+06	3.53633e+06	1.79112e+06	1.43883e+06	1.76465e+06	1.76189e+06
11121262	actin related protein 2/3 protein complex subunit p16 [Lumbricus rubellus]	383071	277179	252765	518227	590677	508371	239824	483835	401740	505667	198688	498435
524883760	PREDICTED: heterogeneous nuclear ribonucleoprotein R-like [Aplysia californica]	138384	121238	165334	113340	109937	131185	131501	62132.4	122758	153694	117341	129367
524882307	PREDICTED: cysteine and glycine-rich protein 2-like [Aplysia californica]	304461	306849	345967	363745	336283	334740	279974	308750	355282	267397	339332	281004
734601710	PREDICTED: FRAS1-related extracellular matrix protein 3 [Larimichthys crocea]	12395.1	9216.96	13531	4974.08	14332.1	10945.6	10596.4	15608.9	10189.1	861.582	7554.37	15305.2
762091515	PREDICTED: NSFL1 cofactor p47-like [Crassostrea gigas]	353907	284453	305323	443484	451394	343429	295223	425908	335966	344497	250638	353395
762131843	PREDICTED: large proline-rich protein BAG6-like isoform X1 [Crassostrea gigas]	241332	237072	242166	232235	327000	257402	194636	302840	230831	259830	211344	212731
524869977	PREDICTED: cartilage oligomeric matrix protein-like [Aplysia californica]	106871	122567	115847	80576.8	99457.2	105894	80944.2	88637.1	108247	99093.2	92174.8	110782
676487994	hypothetical protein LOTGIDRAFT_97846, partial [Lottia gigantea]	498100	593363	536888	231850	336452	439166	367787	404134	380632	322073	511232	435004
762140883	PREDICTED: importin-5-like [Crassostrea gigas]	413412	628184	608341	696101	748114	625296	570714	629872	522560	696093	454351	539878
524902881	PREDICTED: DNA-binding protein HEXBP-like isoform X2 [Aplysia californica]	14254.3	13073	12696.1	7301.39	7740.6	10329.7	14586.2	9376.02	11612.6	1293.32	13614	9528.09
676443772	hypothetical protein LOTGIDRAFT_201415 [Lottia gigantea]	34409	39773.9	51395.2	47243.7	89137.2	99030.8	64318	29269	58896.1	33184	78970.4	66342.4
871270816	PREDICTED: Golgi apparatus protein 1-like [Aplysia californica]	37401.4	61859.1	29083.5	47581.8	37596.7	40711.4	32709	53414.9	34600.7	51123.7	30638.5	30558.7
762075651	PREDICTED: dual specificity mitogen-activated protein kinase kinase 1-like isoform X1 [Crassostrea gigas]	88460	66992.9	79402.9	119144	106363	122154	80652.5	88990.5	92107.7	97027	80855.8	94227.2
768412937	PREDICTED: cytochrome c oxidase subunit 5A, mitochondrial [Plutella xylostella]	1.40079e+06	1.40837e+06	1.19016e+06	1.61231e+06	1.65021e+06	1.27693e+06	1.16959e+06	1.8265e+06	1.25852e+06	1.44022e+06	1.06691e+06	1.06337e+06
871215882	PREDICTED: short transient receptor potential channel 4-like [Aplysia californica]	181926	151823	186410	127552	160516	211026	174263	110123	176703	188164	159405	125054
761902532	PREDICTED: deleted in malignant brain tumors 1 protein-like [Amphimedon queenslandica]	45895.2	42379.9	42037.3	61502.3	43107.7	55470.9	27595.3	56933.3	40726.8	55031.7	26029.1	59482.6
762155362	PREDICTED: plastin-3-like [Crassostrea gigas]	15357.8	24076.6	33630.2	54156.5	42381.1	29252.2	19196.2	57830.6	3095.76	40066.9	13593.5	48154.8
676494455	hypothetical protein LOTGIDRAFT_184553 [Lottia gigantea]	64773.2	91170.5	80198.6	144437	133996	113313	76164.4	123421	98588.8	108367	81507.5	86167.9
676478929	hypothetical protein LOTGIDRAFT_206985 [Lottia gigantea]	79996.5	111002	122780	100563	81589.4	85209.1	109116	56867	82987.6	87967.2	99912.5	94601.9
O43148	MCES_HUMAN mRNA cap guanine-N7 methyltransferase OS=Homo sapiens GN=RNMT PE=1 SV=1	146196	187497	230262	139727	101320	120252	144225	117570	129480	133786	151230	169669
762093591	PREDICTED: paramyosin-like isoform X1 [Crassostrea gigas]	1.66304e+07	1.57159e+07	1.4872e+07	1.3466e+07	1.56559e+07	1.73291e+07	1.39431e+07	1.47348e+07	1.45696e+07	1.67882e+07	1.29276e+07	1.26222e+07
871272966	PREDICTED: heat shock protein 75 kDa, mitochondrial-like [Aplysia californica]	211677	213149	240158	229119	204818	195896	207006	181964	202140	186763	204900	199252
871210040	PREDICTED: gephyrin-like [Aplysia californica]	33694.9	37680.8	36392.3	23479.9	21986.9	28803.8	12767.7	18449.8	31880.8	27306.1	42721.7	33052.9
762106905	PREDICTED: glycogenin-1-like isoform X1 [Crassostrea gigas]	2.5363e+06	3.2163e+06	3.99309e+06	3.09719e+06	3.49402e+06	3.60498e+06	3.11912e+06	3.10633e+06	2.63494e+06	3.08892e+06	2.81288e+06	3.44019e+06
762108250	PREDICTED: myophilin-like [Crassostrea gigas]	1.18655e+06	871761	864519	1.58557e+06	1.48578e+06	1.20818e+06	939868	1.47822e+06	1.06569e+06	1.1386e+06	819045	1.12865e+06
871204866	PREDICTED: yolk ferritin-like [Aplysia californica]	45927.4	94483.9	87176.6	141238	113912	119503	116240	78438	55311.2	81790.9	71438.2	146117
762143342	PREDICTED: inositol polyphosphate 1-phosphatase-like [Crassostrea gigas]	41411.5	42778.4	41425.2	56881.1	64637.6	52953.2	33342.7	48604.6	51950.8	46065.2	41646.7	51968.2
676438476	hypothetical protein LOTGIDRAFT_225737 [Lottia gigantea]	74272.7	65986.4	62852	84017.2	94721.4	96657.4	81174	64696	71809.1	59566	86887.4	72057.6
524915352	PREDICTED: NADH dehydrogenase [ubiquinone] 1 beta subcomplex subunit 11, mitochondrial-like [Aplysia californica]	111670	113655	100804	115524	131685	115387	103481	132087	98584.9	81944.1	95021.3	116645
676470530	hypothetical protein LOTGIDRAFT_164153 [Lottia gigantea]	34565.7	27611.2	31358.4	50753.5	44005.5	37954.1	33076.5	38283.9	29974.9	40727.7	22470.2	41661.6
817077037	PREDICTED: ryanodine receptor 44F isoform X18 [Athalia rosae]	333942	356894	426554	325303	341417	341914	319094	277267	309118	312608	393228	326135
762123740	PREDICTED: stromal cell-derived factor 2-like [Crassostrea gigas]	9015.95	12495.7	11703.9	8563.29	36311.2	11962.4	10143.9	16486.2	9233.32	19303.3	11941	14893.4
18256864	Ubc protein [Mus musculus]	8.99387e+06	7.24386e+06	6.18678e+06	1.293e+07	9.80013e+06	8.97919e+06	5.80968e+06	1.18675e+07	7.77904e+06	9.34553e+06	6.18387e+06	8.29292e+06
762168829	PREDICTED: phospholipase A-2-activating protein-like [Crassostrea gigas]	70265.3	69065.8	80363.7	86108	80535.4	90992.3	74003.3	62765.2	75297.2	87558.9	57762.5	77109.9
505848359	PREDICTED: guanosine-3',5'-bis(diphosphate) 3'-pyrophosphohydrolase MESH1 [Sorex araneus]	35417.5	52612.8	40273.3	98794	91740.6	75396.2	44032.6	71954.9	61204.8	65039.8	47866.4	68690.6
443703702	hypothetical protein CAPTEDRAFT_149447 [Capitella teleta]	310760	297719	256700	461930	513526	324101	286517	388040	344633	386271	254181	309924
405952417	Calmodulin [Crassostrea gigas]	169391	157358	82279.6	208899	201089	91515.1	87656.2	174046	83544.5	208024	171060	103959
676496266	hypothetical protein LOTGIDRAFT_198206 [Lottia gigantea]	16112.5	10263.9	25904.8	19544	19408.2	1454.26	22551.7	2069.84	8108.51	27335.3	6864.2	17378.7
405953724	hypothetical protein CGI_10004031 [Crassostrea gigas]	59411.9	63872.1	130845	111913	84158.5	66474.7	64379.3	76490.8	76828.5	118794	77989.3	55259.6
676470733	hypothetical protein LOTGIDRAFT_233807 [Lottia gigantea]	7014.8	2561.38	6378.71	19712.1	1832.11	8597.93	12671.9	5308.83	7630.84	1214.28	4749.96	10273.8
762145638	PREDICTED: probable RISC-loading complex subunit BRAFLDRAFT_242885 [Crassostrea gigas]	77174.3	280217	209626	172109	220708	154294	156723	208218	157430	183593	146033	159377
762156450	PREDICTED: calcineurin B homologous protein 1-like [Crassostrea gigas]	37451.4	26746.4	22999.3	44556.6	32106.7	32081.2	21881.2	40420	28070.4	32250	23810.5	31356.4
762110927	PREDICTED: splicing factor U2AF 50 kDa subunit-like [Crassostrea gigas]	216986	214257	233645	244855	248858	228514	193389	237358	211322	207396	194876	214178
871263726	PREDICTED: uncharacterized protein LOC101860928 isoform X1 [Aplysia californica]	5906.92	13199.5	14587.1	22764.8	17139.3	16396.8	8241.42	10439.6	18110.4	16272.2	10968.7	17617.4
762164567	PREDICTED: thioredoxin domain-containing protein 17-like [Crassostrea gigas]	410156	269062	234090	399488	444411	339696	276723	400856	312292	349365	235525	327066
676436929	hypothetical protein LOTGIDRAFT_230689 [Lottia gigantea]	36036	27785.2	23645.1	65129	45879.9	38854.7	28591.2	42062.9	42415.7	54747.6	24775.5	22645.9
525009222	PREDICTED: lysine--tRNA ligase isoform X2 [Ficedula albicollis]	173686	184603	130170	79731.9	32152.9	134399	151440	56536.4	97832.8	119413	138660	102320
524874940	PREDICTED: NADH dehydrogenase [ubiquinone] 1 alpha subcomplex subunit 6-like [Aplysia californica]	200748	420283	293690	449662	416665	479200	329333	252678	354739	472403	293103	347056
505842409	PREDICTED: lipoamide acyltransferase component of branched-chain alpha-keto acid dehydrogenase complex, mitochondrial [Sorex araneus]	124138	155886	145754	201662	202891	140376	133029	184034	140500	147576	122753	151275
195120101	GI19538 [Drosophila mojavensis]	117248	113204	130894	173670	137655	121065	131333	108143	115401	127990	105628	129728
762086124	PREDICTED: CLIP-associating protein 1-like isoform X2 [Crassostrea gigas]	8165.41	10483.6	8267.59	10704.6	12818.3	10560.8	887.764	12858.9	8076.81	15510.9	7179.34	10680.6
676482987	hypothetical protein LOTGIDRAFT_195070 [Lottia gigantea]	9.14651e+06	8.9384e+06	6.80505e+06	8.51853e+06	7.60759e+06	8.53311e+06	6.65583e+06	8.38414e+06	6.93903e+06	1.0015e+07	6.13495e+06	6.68131e+06
632965617	PREDICTED: peroxisomal sarcosine oxidase isoform X1 [Callorhinchus milii]	26274	28867.2	33590.5	13893	14395.8	26175.9	13750.8	14946	30549.1	20869.2	34361.2	15005.9
755702120	PREDICTED: alkylglycerol monooxygenase isoform X2 [Felis catus]	948.303	32605.3	37223.6	11762.7	20172.1	20634.9	33642.1	3194.38	26688.8	3982.24	23428.5	20576.5
676435777	hypothetical protein LOTGIDRAFT_200177 [Lottia gigantea]	271228	293384	480479	143654	162220	224227	255129	187052	229538	229042	307449	214817
301620173	PREDICTED: spermidine synthase isoform X1 [Xenopus (Silurana) tropicalis]	209743	218379	155295	185991	245503	185043	159282	144131	180530	130305	186688	282916
762131353	PREDICTED: small nuclear ribonucleoprotein-associated protein B-like [Crassostrea gigas]	157383	362905	256572	287734	262669	318309	265036	282925	238599	284580	229756	184753
Q1RMH9	DNJC2_BOVIN DnaJ homolog subfamily C member 2 OS=Bos taurus GN=DNAJC2 PE=2 SV=1	36739	34199.5	39502.1	43353.2	40734.4	34478.2	33534.2	38880.1	29757.3	38919.3	28728.2	36649.2
762106634	PREDICTED: 26S protease regulatory subunit 8 [Crassostrea gigas]	678958	738396	715193	750483	729159	691348	644224	667663	635486	696150	606917	624209
676422237	hypothetical protein LOTGIDRAFT_208417 [Lottia gigantea]	19718.4	18021.1	29842.5	15274.8	16129.4	25660.8	18491.7	20850.2	17073.6	22274.9	15744.3	17754.4
676433711	hypothetical protein LOTGIDRAFT_199820 [Lottia gigantea]	1.41954e+06	1.47423e+06	1.70656e+06	1.17719e+06	1.55714e+06	1.34357e+06	1.2675e+06	1.32962e+06	1.33287e+06	1.27764e+06	1.20451e+06	1.39673e+06
762116497	PREDICTED: 26S protease regulatory subunit 6B isoform X2 [Crassostrea gigas]	199351	262546	257270	380381	378640	277026	223961	237775	300391	313499	251868	251091
557025375	PREDICTED: papilin-like isoform X2 [Latimeria chalumnae]	64790.3	61903.5	108214	62767.2	70248.5	52763.8	106027	65065.8	39859.3	67282.6	45006.7	54886.4
676451427	hypothetical protein LOTGIDRAFT_202077 [Lottia gigantea]	816384	779414	931978	934455	994482	1.00032e+06	695580	803767	812215	781157	816850	994502
156379964	predicted protein [Nematostella vectensis]	79714.4	111987	65097.2	140221	83667.5	165391	43601.9	119900	154865	92004.4	105761	64381.2
675377989	Heterogeneous nuclear ribonucleoprotein A1, A2/B1-like protein, partial [Stegodyphus mimosarum]	411830	432785	349834	378380	345369	364144	341151	371483	306987	404764	306248	319517
157103416	AAEL000536-PA [Aedes aegypti]	149874	203324	170555	151273	206054	210692	140417	178743	123616	175760	181602	179905
524894818	PREDICTED: alpha-crystallin B chain-like [Aplysia californica]	2.03237e+06	1.65751e+06	1.30508e+06	1.96974e+06	1.77189e+06	1.48589e+06	1.24694e+06	2.06135e+06	1.28191e+06	1.92485e+06	1.05222e+06	1.6065e+06
762096631	PREDICTED: 26S proteasome non-ATPase regulatory subunit 1-like [Crassostrea gigas]	915764	816158	888419	944977	1.15745e+06	784769	775357	913649	757770	848133	776564	871026
403179	kinesin light chain [Doryteuthis pealeii]	120261	278831	252467	335739	348953	251708	219530	302434	230379	235855	185752	250413
524914082	PREDICTED: peflin-like [Aplysia californica]	74770.6	105482	99940.1	115796	116532	131694	87327.3	103041	116191	99454.3	89027.2	82617.5
405976087	Splicing factor U2AF 50 kDa subunit [Crassostrea gigas]	243750	194170	256581	233494	224682	222523	185933	199459	205596	236219	188817	216655
871269039	PREDICTED: uncharacterized protein LOC101854908 [Aplysia californica]	699546	466899	473263	1.12491e+06	1.01178e+06	981256	545819	788401	781292	793024	523801	831723
405952152	Mps one binder kinase activator-like 1 [Crassostrea gigas]	34936.8	33455.6	36905.4	47471.8	45278.4	51427.9	35127.6	37267.8	36958.2	46347.5	32638.2	35199.8
405961406	Ras GTPase-activating protein-binding protein 2 [Crassostrea gigas]	1.13581e+06	945787	1.02364e+06	937122	1.06427e+06	772667	748386	1.11444e+06	826096	912730	796706	867928
524864996	PREDICTED: betaine--homocysteine S-methyltransferase 1-like [Aplysia californica]	35048.4	60572.8	66567.5	61655.3	45761.8	50981.1	63304.5	50301.5	35848.2	34252.6	55573.3	47847.5
871274397	PREDICTED: titin-like [Aplysia californica]	86663.4	26763.6	36164.3	14536	14463.8	27211.2	32520.3	14902.2	19196.3	22616.8	25044.9	69992.4
676453919	hypothetical protein LOTGIDRAFT_188369, partial [Lottia gigantea]	100420	122546	233336	107085	56594.8	97310.7	56441	184143	112583	104293	111876	72793.7
762111820	PREDICTED: adenosine deaminase-like [Crassostrea gigas]	920223	1.03819e+06	888816	1.21801e+06	1.10831e+06	1.05141e+06	1.07166e+06	892738	980119	991071	807319	828700
871231016	PREDICTED: sarcoplasmic calcium-binding protein-like [Aplysia californica]	515332	639489	349484	686181	756062	683771	519598	721644	545052	603123	323610	535058
762169240	PREDICTED: calmodulin-like protein 4 [Crassostrea gigas]	132271	102530	145463	332814	270718	209648	121695	228189	201183	221414	120503	174669
410924690	PREDICTED: non-specific lipid-transfer protein [Takifugu rubripes]	521606	357065	331005	552398	509294	661046	413113	483532	518736	403216	341627	462987
871211002	PREDICTED: microtubule-associated protein futsch-like isoform X2 [Aplysia californica]	529223	565006	755315	408033	591280	487848	507570	511887	531483	370625	559554	502712
226478678	Stress protein DDR48 (DNA damage-responsive protein 48) [Schistosoma japonicum]	160355	136618	137810	147581	200190	148021	86392.9	189064	111984	151409	137470	155723
762134818	PREDICTED: nose resistant to fluoxetine protein 6-like [Crassostrea gigas]	3977.69	59819.6	44761.1	66924.7	86250.3	56105.9	48490.2	71668.9	37829.3	48636.4	36834	40667
762085628	PREDICTED: protein couch potato-like isoform X2 [Crassostrea gigas]	103801	97623.4	109917	68282.9	107506	86178.3	78407.7	113337	86766.6	79082.4	75285.2	79557.4
676472298	hypothetical protein LOTGIDRAFT_124155, partial [Lottia gigantea]	231975	190703	202120	244745	241359	222502	183452	221480	197378	231362	155294	202781
657809891	PREDICTED: LOW QUALITY PROTEIN: eukaryotic translation initiation factor 4 gamma 1-like [Cynoglossus semilaevis]	92148.2	85560.3	87574.4	103042	102011	95136.9	88319.1	90526.9	79671.8	92363.4	62905.3	91523.9
524871398	PREDICTED: ankyrin repeat domain-containing protein 40-like [Aplysia californica]	181969	85332.4	89035.5	152962	121359	97662.6	72896.8	166218	112303	131071	64562.4	103707
443692870	hypothetical protein CAPTEDRAFT_102987 [Capitella teleta]	62002.1	11032.9	56813.8	51281.7	89160.2	49708.2	47953.7	35301.3	55482.7	46079.1	62704	38349.3
762151825	PREDICTED: RNA-binding protein Nova-1-like isoform X4 [Crassostrea gigas]	548813	509948	531535	515734	536610	550563	458669	482537	501266	436393	493597	478334
123437955	ankyrin repeat protein [Trichomonas vaginalis G3]	34830.7	30908.6	24380.5	29955.2	31316.1	29146.6	24008.2	30285.3	25718.1	34617.8	20727.3	25792.8
443721448	hypothetical protein CAPTEDRAFT_167406 [Capitella teleta]	137874	132782	115299	257020	324958	155966	121910	283567	147334	189619	98724.4	160731
823327709	chitin binding beak protein 2 [Dosidicus gigas]	116737	225057	339410	189664	286041	235668	256682	294380	100029	238113	155664	196138
676490897	hypothetical protein LOTGIDRAFT_168884 [Lottia gigantea]	143350	111838	128367	143328	144447	126133	116705	137101	117147	133080	99967.3	106446
762152386	PREDICTED: RILP-like protein 1 isoform X5 [Crassostrea gigas]	17906.7	13470.3	17676.2	19786.5	23558.3	18041.7	13126.5	13092.9	31897	12953	11471.8	15782.9
676475117	hypothetical protein LOTGIDRAFT_229193 [Lottia gigantea]	125412	113592	126414	133480	133516	172245	103798	139106	123124	109240	113345	127671
Q9Z0K8	VNN1_MOUSE Pantetheinase OS=Mus musculus GN=Vnn1 PE=1 SV=3	183958	162909	237879	279887	235851	214779	234898	166220	228199	176193	105932	258669
675857216	hypothetical protein HELRODRAFT_170101 [Helobdella robusta]	185677	253321	195409	282676	256873	268078	201768	232456	224491	243053	174640	206260
524913119	PREDICTED: mitochondrial import inner membrane translocase subunit Tim10B-like [Aplysia californica]	46389.5	36626.4	30443.7	65214.7	60654.3	45154.4	33687.3	63518	38339.1	43219.3	31782	42379
871227201	PREDICTED: nuclear receptor coactivator 5-like [Aplysia californica]	136417	128644	108426	218652	151918	149355	124990	145311	99035.1	141739	97572.8	185395
333449385	USP-like protein isoform 2 [Crassostrea ariakensis]	1.55365e+06	1.26864e+06	1.26864e+06	1.88443e+06	1.90493e+06	1.92797e+06	1.14813e+06	1.7881e+06	1.57223e+06	1.42471e+06	1.29622e+06	1.48473e+06
871208587	PREDICTED: titin-like isoform X8 [Aplysia californica]	221860	233950	210203	323049	328274	236626	182454	336949	203570	233458	176457	247137
157126791	AAEL010611-PA [Aedes aegypti]	787272	643943	547589	885634	936183	672180	510190	1.03826e+06	593141	701443	419570	708278
762162152	PREDICTED: laccase-2-like isoform X1 [Crassostrea gigas]	4010.81	1193.02	2839.17	5062.82	1701.46	3069.25	3144.14	1645.55	1386.2	4568.32	1960.62	3164.19
A8DYP0	OBSCN_DROME Obscurin OS=Drosophila melanogaster GN=Unc-89 PE=1 SV=1	841615	804227	790386	842340	1.04501e+06	621215	650674	806504	646388	719981	745842	819617
524896556	PREDICTED: vigilin-like [Aplysia californica]	742368	535388	529859	792427	723697	543258	497155	670947	542298	593927	493078	633595
762131132	PREDICTED: zygotic DNA replication licensing factor mcm3-like [Crassostrea gigas]	104093	76199.2	103158	60247.5	73654.7	70227	79764.3	58175.3	98862.4	57404.3	67793.3	70340.5
762142949	PREDICTED: activating transcription factor 7-interacting protein 1-like [Crassostrea gigas]	42030.4	49525	42458.7	44087.5	40460.9	38566.9	37558.1	43550.1	35490.4	38381.7	39357.1	33568.2
817250614	Csa-calmodulin 6, partial [Cupiennius salei]	3.65205e+06	2.56241e+06	2.25543e+06	5.75356e+06	4.09044e+06	2.36916e+06	2.04312e+06	5.69199e+06	2.3486e+06	3.34457e+06	2.13594e+06	2.76482e+06
871273242	PREDICTED: tensin-1-like, partial [Aplysia californica]	211442	173017	196990	282479	281900	208480	156537	233043	209894	202183	176259	220991
676487218	hypothetical protein LOTGIDRAFT_204649 [Lottia gigantea]	12403.7	15775.9	27600.4	15650.7	14660.6	21677.9	20731.3	11544.4	17227.6	12998.9	12350.1	20514.3
188572389	putative 40S ribosomal protein RPS10 [Novocrania anomala]	1.54785e+06	2.16514e+06	1.60857e+06	2.09644e+06	1.95638e+06	1.66183e+06	1.54025e+06	1.83075e+06	1.57764e+06	2.01502e+06	1.25998e+06	1.53827e+06
2665349	s-syntaxin [Doryteuthis pealeii]	347041	292376	222236	294898	304902	285224	256305	325102	257978	306860	139399	259346
405972312	Myosin-2 essential light chain [Crassostrea gigas]	1.03514e+06	935918	849156	1.83973e+06	1.71775e+06	1.21923e+06	911590	1.50877e+06	1.11696e+06	1.32815e+06	692086	1.15993e+06
645016475	PREDICTED: histidine triad nucleotide-binding protein 1 [Nasonia vitripennis]	561359	384069	414872	534437	524339	472491	382627	485708	415094	461006	359789	452198
148225200	ubiquitin-like modifier-activating enzyme 5 [Xenopus laevis]	48283.1	43975.1	51640.4	64905.3	54565.5	43160.2	47161.3	50271.3	49085.6	30594.2	42019.8	51857.3
6492342	AF182339_1 clathrin assembly protein AP180 [Doryteuthis pealeii]	127339	114875	114315	138339	100539	131525	87861.9	128882	106449	122317	106572	90514.9
194760571	GF14408 [Drosophila ananassae]	580860	777653	652195	1.42195e+06	1.12022e+06	727175	634256	1.2302e+06	685967	890099	446284	779260
443710129	hypothetical protein CAPTEDRAFT_135802, partial [Capitella teleta]	295547	212018	238774	305722	301132	216290	194880	243984	204430	253007	202508	288128
762104364	PREDICTED: heterogeneous nuclear ribonucleoprotein A1, A2/B1 homolog isoform X2 [Crassostrea gigas]	735501	911013	865625	852477	776222	719407	665755	879236	637145	738166	638669	731841
871207280	PREDICTED: dynactin subunit 1-like isoform X4 [Aplysia californica]	285417	316517	296144	341646	329994	266160	227393	284578	263520	305339	240055	299677
676429875	hypothetical protein LOTGIDRAFT_207583 [Lottia gigantea]	3210.02	1719.9	1621.65	3781.87	1610.18	9861.66	786.717	1937.08	2402.85	2109.58	2567.19	9431.57
762075461	PREDICTED: secretory carrier-associated membrane protein 1-like isoform X7 [Crassostrea gigas]	108966	89092.3	65575.9	93403.5	73822.3	76013.7	78370.9	87209.2	82959.9	83326.9	62299.9	52920.4
676421883	hypothetical protein LOTGIDRAFT_152179 [Lottia gigantea]	431032	319284	312266	307290	327576	224698	258876	385550	205241	311559	251781	280915
291237487	PREDICTED: cofilin-like [Saccoglossus kowalevskii]	34986	44644	47581.2	66089.4	54188.7	63548.1	42780	57974.9	59653.7	20008.8	66789.3	26827.2
405969278	Putative ATP-dependent RNA helicase an3 [Crassostrea gigas]	226065	202784	221260	301420	266903	237274	216306	196646	217609	225263	186328	240061
871211002	PREDICTED: microtubule-associated protein futsch-like isoform X2 [Aplysia californica]	379623	352118	391368	309255	295069	295413	275708	374566	296853	273482	279278	281058
676483102	hypothetical protein LOTGIDRAFT_220690 [Lottia gigantea]	596244	633891	490621	865257	1.04612e+06	665233	564821	859768	588629	688024	474393	603544
290794772	tropomyosin [Heterololigo bleekeri]	235912	132569	128788	273500	262245	173631	135565	249278	165352	206038	120031	184648
871236028	PREDICTED: troponin I-like [Aplysia californica]	59818.7	32080.1	25859.3	36252	40471.1	27014.8	35282.5	42156	21041.2	40250.6	22332.1	33623.4
676478858	hypothetical protein LOTGIDRAFT_234917 [Lottia gigantea]	26742.3	21157.7	7756.25	18271.5	27520.1	31864.4	15082.1	19868.8	26806.5	15508.8	12707.7	27185
762151823	PREDICTED: RNA-binding protein Nova-1-like isoform X3 [Crassostrea gigas]	357311	275491	293766	468645	419586	311318	239268	397949	311444	357303	239501	322608
25453302	TNNC_TODPA RecName: Full=Troponin C; Short=TN-C [Todarodes pacificus]	28773.4	52366.6	29131.7	62422.9	57875.9	25302.4	42576.8	53497.9	36709.5	43379	26734.8	21819.4
662203637	PREDICTED: protein kinase C and casein kinase II substrate protein 3-like isoform X1 [Diaphorina citri]	217639	168102	107118	399767	374980	235527	153016	295668	230102	237045	154584	249686
762150314	PREDICTED: endophilin-B1-like isoform X1 [Crassostrea gigas]	99565.9	76682.2	71223	101488	100747	100095	75192	85224.6	82459.4	98848.6	60171.9	80777.1
871228359	PREDICTED: protein FAM98A-like, partial [Aplysia californica]	34613	35072.2	35757.5	47145.4	33220.3	33119.4	35320	34827	31054.7	33001	27630	30345
676494551	hypothetical protein LOTGIDRAFT_229821 [Lottia gigantea]	57174.2	53259.5	49998.8	117971	33423.5	43605.5	67310.4	36025	63928.8	31251.4	55885.9	57578.4
676460331	hypothetical protein LOTGIDRAFT_228660 [Lottia gigantea]	5048.93	51909	21949.8	16981.6	11779.7	9269.31	8518.03	4833.16	46332.4	26006.8	4603.14	12219.4
762142141	PREDICTED: small nuclear ribonucleoprotein E [Crassostrea gigas]	153755	193964	127421	147887	121950	137361	149837	147551	132919	114260	118389	110334
524913816	PREDICTED: heterogeneous nuclear ribonucleoprotein A1-like isoform X1 [Aplysia californica]	220630	213167	240381	362834	333330	284214	186231	283898	263369	237064	206110	273244
676460357	hypothetical protein LOTGIDRAFT_105126 [Lottia gigantea]	52352.6	53786.8	49916.3	60510.1	51907.4	53479.7	45492.7	50945.9	43711.4	59405.8	33239.1	49177.8
556592509	heat shock factor binding protein [Octopus vulgaris]	67429.7	61306.9	15131.5	70153.6	85675.2	53929	47189.7	61210.2	51285.5	57657.6	44226.9	48054.4
676435463	hypothetical protein LOTGIDRAFT_200091, partial [Lottia gigantea]	34723.1	32204.5	39009.8	18595.8	29700.9	35232.4	32302.3	20010.3	28269.7	35658	20276.6	29329.4
557006795	PREDICTED: N-alpha-acetyltransferase 38, NatC auxiliary subunit [Latimeria chalumnae]	66286.6	32574.2	59291.5	54314.3	55467.6	47816.9	49719	78967.7	39692.2	34178.4	38759.7	35042.4
762072229	PREDICTED: serine/threonine-protein kinase PAK 3-like isoform X2 [Crassostrea gigas]	68005.8	54602.4	61600.6	55169.1	56666.9	66102.4	55351.7	42079.5	50093.7	57481.6	51674.9	60097.1
871222689	PREDICTED: filamin-A-like [Aplysia californica]	3.16057e+06	3.651e+06	4.17714e+06	2.09337e+06	2.38245e+06	2.72335e+06	2.68285e+06	1.82919e+06	2.71312e+06	2.29388e+06	3.68876e+06	2.69248e+06
762086570	PREDICTED: serine/arginine-rich splicing factor 6-like isoform X2 [Crassostrea gigas]	482700	536764	339601	165488	320349	246159	348744	313749	271790	274289	344524	274122
524907157	PREDICTED: lanC-like protein 3 isoform X3 [Aplysia californica]	137960	90097.3	46493.3	64969.5	35692.1	83637.2	65212.1	51179.3	68003.4	85582.2	71706.2	59183.3
762170312	PREDICTED: Williams-Beuren syndrome chromosomal region 27 protein-like isoform X1 [Crassostrea gigas]	181810	206716	171849	192362	249982	288427	189016	227198	175343	168562	160784	206060
762129214	PREDICTED: clathrin light chain A-like isoform X2 [Crassostrea gigas]	718070	581980	483608	841572	830767	623655	523316	726039	580710	688315	471366	570117
405955586	Putative beta-D-xylosidase 2 [Crassostrea gigas]	70986.6	41876.1	64015.5	57904.8	27291	69584.2	74048.1	23278.9	41139.8	44952.7	62493.2	43305.7
676455521	hypothetical protein LOTGIDRAFT_160698 [Lottia gigantea]	87192.6	109604	68454.3	67241.3	109629	91373.7	86621.8	93136.2	78506	73341.1	69958.1	63570.5
256009772	tropomyosin, partial [Xenoturbella bocki]	596622	479528	296561	548896	554508	385571	304361	595109	415615	506374	320244	352653
149287190	mitochondrial import inner membrane translocase subunit Tim8-like protein [Ornithodoros parkeri]	716316	741058	542349	1.1165e+06	1.23135e+06	685988	598226	1.13871e+06	687915	785525	462659	711768
676443143	hypothetical protein LOTGIDRAFT_231121 [Lottia gigantea]	76291.2	63564.9	66655.2	73713	72721.9	61428.9	59755.4	71799.4	60580.8	66780.8	47517.4	53987.1
762120424	PREDICTED: DNA replication licensing factor mcm7-like [Crassostrea gigas]	57520.5	72043.7	98025.8	78185.6	73244.9	59779.7	62257.3	58440.4	59164.3	68708.7	60954.7	72070.3
871240958	PREDICTED: U5 small nuclear ribonucleoprotein 200 kDa helicase-like [Aplysia californica]	176842	91091.8	113159	156833	156299	141659	93743.1	166128	134782	142874	80376.8	107603
291239607	PREDICTED: protein PBDC1-like [Saccoglossus kowalevskii]	34656.9	21186.6	24456.7	35974	32553.1	32079	23450.1	29719.2	27405.2	27764.5	21538.8	27091.9
762088224	PREDICTED: uncharacterized protein LOC105327563 [Crassostrea gigas]	6872.61	6807.72	3576.7	9822.73	7694.27	2616.97	7609.12	3261.44	6943.09	1246.43	9210.81	4161.18
762136476	PREDICTED: lupus La protein homolog [Crassostrea gigas]	161687	168002	158059	190454	188875	165059	147147	177454	146891	163774	119426	140528
543382508	PREDICTED: 40S ribosomal protein S5-like, partial [Pseudopodoces humilis]	492418	496117	464836	441680	459353	369813	413336	450430	341223	455793	335697	366310
405955166	hypothetical protein CGI_10002360 [Crassostrea gigas]	341457	410717	527668	469727	439536	412391	416675	316700	408604	336120	422994	353913
443698097	hypothetical protein CAPTEDRAFT_220338 [Capitella teleta]	102453	69853.1	38955.9	66442.2	121358	70290.5	64974.1	96355.7	64268.4	58765.3	60014.2	62219.7
232180	GBG_LOLFO RecName: Full=Guanine nucleotide-binding protein subunit gamma; Flags: Precursor [Loligo forbesii]	101465	342351	211448	347301	399519	391006	236989	327928	263459	276078	216789	231393
762123005	PREDICTED: death-associated protein 1-like [Crassostrea gigas]	151779	146729	131171	207714	197444	129462	97797.6	222273	117273	115137	135428	146338
762090134	PREDICTED: uncharacterized protein LOC105328327 [Crassostrea gigas]	65879.3	68311.1	47316.2	69306.9	78223.7	77205.5	52666.1	81685.9	62850	55031.6	43764	55403.4
443716614	hypothetical protein CAPTEDRAFT_181922 [Capitella teleta]	635397	447909	746970	629019	391491	629304	789240	546457	401479	484762	409083	378000
676495813	hypothetical protein LOTGIDRAFT_95271, partial [Lottia gigantea]	130605	177808	188478	311729	300670	193412	140474	308426	177770	194805	131798	172746
762170806	PREDICTED: peptidyl-prolyl cis-trans isomerase FKBP8-like [Crassostrea gigas]	64816.5	49723	51532.5	65664.9	74237	53779	43628.2	67556.9	45604.9	63152.1	22462.1	68543.3
391325923	PREDICTED: thiosulfate sulfurtransferase/rhodanese-like domain-containing protein 1-like [Metaseiulus occidentalis]	30410.4	17380.7	20418	32636.1	40782.8	35413.2	20298.6	28402.3	26522.9	26431.4	18882.2	32397.9
405965400	Synaptopodin-2 [Crassostrea gigas]	47028.7	30156.7	32906.6	49007.8	39933	31239.4	29401.1	38139.3	28393.7	34647	36318	32008.4
746847518	PREDICTED: protein alan shepard, partial [Acromyrmex echinatior]	235108	188371	188398	231589	224512	191886	157054	240785	176808	192585	147974	172756
260829983	hypothetical protein BRAFLDRAFT_114927 [Branchiostoma floridae]	1.32971e+06	1.13844e+06	1.07319e+06	1.17164e+06	1.22837e+06	1.06774e+06	981957	1.17019e+06	1.03877e+06	1.07814e+06	867434	910524
524915709	PREDICTED: ubiquitin-conjugating enzyme E2 L3-like [Aplysia californica]	2.90643e+06	2.3312e+06	2.36753e+06	3.49897e+06	3.65076e+06	3.21396e+06	2.2205e+06	3.0151e+06	2.66489e+06	2.57057e+06	2.28773e+06	2.73702e+06
762094151	PREDICTED: flocculation protein FLO11-like isoform X2 [Crassostrea gigas]	26436	14573.9	16107.8	34795.2	31475.2	25669.9	14345.3	27992	20785	24312.4	15636.8	25359.1
405960403	hypothetical protein CGI_10015075 [Crassostrea gigas]	6126.08	21261.9	26905.1	31468.7	30536.2	19783.1	18467.4	25090.3	21901.5	9563.11	12167.7	30033.5
762092826	PREDICTED: enolase-phosphatase E1-like [Crassostrea gigas]	52509.4	36516.5	42407.9	55703.1	50836.5	55217.7	39104.9	33111.8	54396.6	38422.6	41584.4	45928.1
443699641	hypothetical protein CAPTEDRAFT_129886 [Capitella teleta]	236674	187082	162623	273900	251181	201051	176868	261881	185531	188862	151273	164807
762170127	PREDICTED: protein tweety homolog 1-like [Crassostrea gigas]	11153.5	5684.52	13155.2	9550.69	4213.71	13621.8	9996.24	19231.5	9877.82	1955.49	3823.59	4475.76
318609972	paramyosin [Haliotis discus discus]	1.32873e+07	1.57186e+07	1.37647e+07	1.41227e+07	1.61189e+07	1.55482e+07	1.1867e+07	1.26309e+07	1.23591e+07	1.54656e+07	1.09281e+07	1.29316e+07
675363897	Coiled-coil domain-containing protein 58, partial [Stegodyphus mimosarum]	144643	124544	84034.7	209913	206236	130665	98644.6	193866	116115	148974	80100	135749
676472337	hypothetical protein LOTGIDRAFT_164694 [Lottia gigantea]	14177.9	1968.45	10521.5	10884	12830.3	5890.64	9032.55	10924.4	4987.29	2305.9	6914.94	14184.8
524883770	PREDICTED: nucleolin-like isoform X1 [Aplysia californica]	2.5389e+06	3.0284e+06	2.84385e+06	2.56869e+06	2.56933e+06	1.62103e+06	2.01144e+06	3.13109e+06	1.98797e+06	2.15588e+06	1.83859e+06	1.90792e+06
524869443	PREDICTED: syntaxin-7-like [Aplysia californica]	130412	110941	72441.5	193751	209261	128870	104163	159384	115241	133115	84108.2	130360
13516405	minor tachykinin precursor [Callistoctopus minor]	22254.1	16953.9	13062.9	23304.3	23378.5	17071.8	12364.1	24656.9	16963.4	19346.5	10031.5	16283.3
530597962	PREDICTED: charged multivesicular body protein 3 isoform X3 [Chrysemys picta bellii]	53543.4	34457.5	29552.1	125778	80264.6	41063.9	60286	101516	28788.5	36586	47333.2	38648.2
156404616	predicted protein [Nematostella vectensis]	548713	622895	660087	1.05406e+06	934797	662403	505598	802017	659256	685614	434667	760804
762150084	PREDICTED: importin subunit beta-1-like isoform X2 [Crassostrea gigas]	239892	214865	258175	280276	268073	254483	244114	181613	218456	233945	207585	214367
762111503	PREDICTED: tumor susceptibility gene 101 protein-like [Crassostrea gigas]	107268	82717.2	90294	137638	139559	111051	75437.4	114846	92431.6	110919	74083.3	105357
676425165	hypothetical protein LOTGIDRAFT_211598 [Lottia gigantea]	327643	265577	240885	397106	393186	278654	220794	380569	268558	285124	204436	271413
676490979	hypothetical protein LOTGIDRAFT_151060 [Lottia gigantea]	56376.8	67572.1	45331.3	75831.4	82438	40411.1	54046.9	59762.7	58409.5	64613.9	42723.2	35324.1
524865136	PREDICTED: 26S proteasome non-ATPase regulatory subunit 4-like [Aplysia californica]	494090	376570	358334	428685	457589	246072	285685	454085	273338	310003	308223	388705
321455834	hypothetical protein DAPPUDRAFT_302243 [Daphnia pulex]	287185	211344	203937	272304	255318	245448	172246	230021	248514	227817	172087	210963
646694345	Small ubiquitin-related modifier [Zootermopsis nevadensis]	614092	513137	432454	703458	677777	462907	382698	709608	424621	582252	328932	481096
762150322	PREDICTED: endophilin-B1-like isoform X5 [Crassostrea gigas]	64223.3	75028.3	53156.6	78152	80346.2	75635.6	61717.5	60898.1	59321	69958.4	51903.9	60190.8
676488969	hypothetical protein LOTGIDRAFT_236234 [Lottia gigantea]	337349	508801	533267	674425	706720	540046	459812	533240	443230	512759	406794	455933
291237487	PREDICTED: cofilin-like [Saccoglossus kowalevskii]	78189	72795	52256.1	84609.1	87901.8	74906.3	64396.6	78850.7	68468.9	49934.8	65750	56399.5
780135704	PREDICTED: geranylgeranyl pyrophosphate synthase [Strongylocentrotus purpuratus]	121369	41212.2	60108.8	278133	241561	247169	108154	127798	169478	201693	64784.3	170815
762115637	PREDICTED: uncharacterized protein LOC105337560 isoform X1 [Crassostrea gigas]	2.18516e+06	1.47344e+06	1.32241e+06	2.89276e+06	2.77894e+06	1.96198e+06	1.58384e+06	1.95825e+06	1.87497e+06	1.96527e+06	1.71495e+06	1.6451e+06
762080631	PREDICTED: basic salivary proline-rich protein 2-like isoform X1 [Crassostrea gigas]	120806	177197	147059	111773	105192	132358	115030	118053	100497	143922	103311	95658
646708180	Cytochrome c [Zootermopsis nevadensis]	1.79249e+06	1.53781e+06	1.49839e+06	3.04616e+06	2.95476e+06	1.96592e+06	1.50056e+06	2.38071e+06	1.92556e+06	1.73171e+06	1.38246e+06	1.97499e+06
871213081	PREDICTED: syntaxin-7-like [Aplysia californica]	148146	137556	127439	219173	218898	171080	110455	189421	165379	161188	106779	136827
734601349	PREDICTED: obscurin [Larimichthys crocea]	570135	908074	917729	1.18484e+06	1.18007e+06	886256	671809	961281	774572	822112	736629	839104
871264512	PREDICTED: fibroin heavy chain-like isoform X1 [Aplysia californica]	10614	4950	5429.2	8713.62	8120.97	6308.46	9259.39	5083.65	4649.57	4227.35	6257.11	8047.76
676488141	hypothetical protein LOTGIDRAFT_196347 [Lottia gigantea]	131560	117222	137556	122820	74958.7	81896.3	109451	87151.7	54075.5	130722	100203	84465.5
405962011	5'-AMP-activated protein kinase catalytic subunit alpha-2 [Crassostrea gigas]	4592.35	6518.82	15092.3	8420.98	4644.27	8680.8	9878	7552.6	2883.16	8054.43	530.098	11840
663070985	elongation factor 1-beta [Diaphorina citri]	57327.3	39111	39929.8	45575	54199.4	31555.2	30336.3	46031.1	36225.2	48148	29909.3	36688.3
676471583	hypothetical protein LOTGIDRAFT_164458 [Lottia gigantea]	24313.4	29521.9	41609.5	33914.1	44532.2	41143.8	34455.6	22757.8	38128.4	19529.2	29547.8	38100.5
676466939	hypothetical protein LOTGIDRAFT_163399 [Lottia gigantea]	37605.6	35621.5	39959.9	29984.3	13631.7	35776.5	34354.1	1851.27	33220.1	27176.8	32753.6	34084.1
762136427	PREDICTED: protein sel-1 homolog 1-like isoform X2 [Crassostrea gigas]	40579.1	35416.4	29261.3	51432.5	52641.6	32490.7	23437.5	42698.3	34651.4	44740.9	27353.7	32244.7
676426406	hypothetical protein LOTGIDRAFT_198478 [Lottia gigantea]	695866	717900	574970	791233	675097	727969	605585	538450	588279	690940	588045	533969
762161984	PREDICTED: uncharacterized protein LOC105322292 [Crassostrea gigas]	157963	175014	248013	121387	94034.4	142238	200227	103421	116956	84278.4	139154	151252
676439482	hypothetical protein LOTGIDRAFT_200762 [Lottia gigantea]	223302	171295	152759	235924	224916	202153	156824	194665	167677	205827	132806	167552
735659659	glyceraldehyde-3-phosphate dehydrogenase [Littorina littorea]	315873	489943	523445	519816	900498	358466	468567	357235	462937	340435	563657	440097
676465850	hypothetical protein LOTGIDRAFT_217219 [Lottia gigantea]	65676.5	72772.6	60495.8	66933.7	74445.1	60808.2	53160.8	62566.6	50382.2	66358.4	45809.5	61392.2
871228296	PREDICTED: protein enabled homolog [Aplysia californica]	276964	218639	213731	291231	287380	233196	173410	260693	205704	257660	168529	220892
821325111	uncoupling protein 3 [Danio rerio]	29531.8	25651.5	2325.2	25647.1	17059.4	37839.4	25870	10906.1	5072.87	26954.8	24138.9	23844
871276205	PREDICTED: ubiquitin-like-conjugating enzyme ATG3 [Aplysia californica]	31819.6	27233.6	26840	35183.5	50138.5	31089.6	20784.8	39431.6	28784.7	33406	23641.8	25039
871241766	PREDICTED: septin-2-like [Aplysia californica]	28940.9	42367.4	40199.2	33267	35865.2	38730.8	33239.3	27468.8	31670.5	40373	35314.7	17452
524866778	PREDICTED: C-terminal-binding protein-like isoform X1 [Aplysia californica]	167325	187314	174784	174397	153881	168054	166780	115238	141766	163450	134406	145569
405970417	Titin [Crassostrea gigas]	152261	138863	124915	129413	163143	63640.8	108505	115257	83272.8	99188.6	136709	109302
762137167	PREDICTED: uncharacterized protein LOC105345447 isoform X1 [Crassostrea gigas]	15208.2	7800.41	17223.8	20027.8	18362.6	15236.9	13319.6	14088.6	14045	10847.7	16524.8	10448.4
524909459	PREDICTED: succinyl-CoA ligase [ADP-forming] subunit beta, mitochondrial-like isoform X2 [Aplysia californica]	98686.5	113910	111272	300699	287314	214525	148673	90873.5	189844	177852	142672	201061
676422018	hypothetical protein LOTGIDRAFT_205558 [Lottia gigantea]	157669	136219	147875	189965	171028	161760	149909	126144	138048	141778	107286	151028
676473553	hypothetical protein LOTGIDRAFT_218864 [Lottia gigantea]	48815.1	54916.5	55216.1	9326.48	69769.9	35229.7	36668.9	55500.9	41838.9	53620.1	7479.95	35571.7
524883683	PREDICTED: THO complex subunit 4-like [Aplysia californica]	361428	333149	371108	486995	413327	248529	280063	463087	268191	342450	281699	232961
871243636	PREDICTED: mucin-5AC-like [Aplysia californica]	162446	213045	195544	386523	352626	272628	176399	309645	210864	250274	169246	218954
147898624	uncharacterized protein LOC414579 [Xenopus laevis]	4.56566e+06	4.62292e+06	2.70848e+06	4.44799e+06	2.96787e+06	3.02487e+06	3.21183e+06	4.19592e+06	2.34909e+06	4.30463e+06	2.18292e+06	2.59969e+06
762078274	PREDICTED: radixin-like isoform X3 [Crassostrea gigas]	1.85054e+06	1.64502e+06	1.64401e+06	2.33369e+06	2.1331e+06	1.70837e+06	1.63746e+06	1.77079e+06	1.4384e+06	1.66475e+06	1.5018e+06	1.52695e+06
405961221	DNA replication licensing factor mcm2 [Crassostrea gigas]	200110	187139	278260	177481	193881	190322	190696	184822	155467	168042	147209	188111
524872452	PREDICTED: 39S ribosomal protein L12, mitochondrial-like [Aplysia californica]	242901	237204	192465	387302	387847	224807	194733	376795	212506	266254	137405	221312
762150883	PREDICTED: reticulon-1-A-like isoform X9 [Crassostrea gigas]	628143	764896	700531	800171	740082	762567	623036	624162	605170	644861	559121	647276
871239933	PREDICTED: UPF0568 protein C14orf166-like [Aplysia californica]	280655	277772	282156	360816	376476	270432	249085	299080	250170	304292	187398	265952
524893470	PREDICTED: MICOS complex subunit Mic19-like isoform X3 [Aplysia californica]	127002	130149	125755	179897	157181	143814	96588.3	161150	142291	100534	110982	115606
212168987	S1 type peptidase [Octopus kaurna]	471235	695832	697472	476563	493869	572407	532476	577910	388842	385601	428884	553143
Q55BM1	Y0444_DICDI Probable inactive protein kinase DDB_G0270444 OS=Dictyostelium discoideum GN=DDB_G0270444 PE=1 SV=1	36217.3	31117.4	26582.8	28252.2	37617.5	6594.84	24572.7	37776	21378.1	15637.8	23929.8	16604.2
325296731	ELAV 2-like protein [Aplysia californica]	2.49994e+06	2.10137e+06	2.08251e+06	2.63838e+06	2.83848e+06	2.50226e+06	1.66934e+06	2.75011e+06	1.97418e+06	2.26176e+06	1.52601e+06	2.14682e+06
871224133	PREDICTED: titin-like [Aplysia californica]	1.0098e+06	4.20874e+06	3.59811e+06	5.43867e+06	5.37093e+06	3.5371e+06	2.67071e+06	4.59264e+06	2.8163e+06	3.40048e+06	2.67494e+06	3.31636e+06
405959793	ATP-dependent RNA helicase A-like protein [Crassostrea gigas]	110862	110535	113560	141252	139495	129744	84587.8	122367	102733	110032	89824.4	117048
548421505	PREDICTED: elongation factor 1-delta-like isoform X2 [Pundamilia nyererei]	8126.89	28612.1	48257.5	51321.4	46302.2	26780.5	25060.8	33440.7	25564.9	31200.3	25702.5	34982.6
871264340	PREDICTED: collagen alpha-3(VI) chain-like isoform X2 [Aplysia californica]	333557	551307	559903	344136	263247	405652	351268	298083	328970	335941	457059	293142
762117827	PREDICTED: uncharacterized protein LOC105338382 [Crassostrea gigas]	41876.8	41493.5	36768.9	14195.2	45037.1	41284.5	25390	38167.1	26578.9	31054.8	32995.4	31029
762114382	PREDICTED: importin-7-like isoform X1 [Crassostrea gigas]	193545	141426	176335	239849	229487	144938	165086	206408	142461	156396	122960	151461
405951422	Eukaryotic translation initiation factor 3 subunit G-A [Crassostrea gigas]	288487	312326	305417	316728	690979	265937	275242	296577	312514	373522	298705	269772
762167339	PREDICTED: STE20-like serine/threonine-protein kinase [Crassostrea gigas]	72414.9	67902.4	50952.7	91012.6	100388	74506.1	44718.1	96664.2	61187	72278.9	42503	65647.7
524911700	PREDICTED: charged multivesicular body protein 4c-like [Aplysia californica]	312955	156778	197897	266901	280853	143605	147421	313847	159126	199548	134051	183836
394337181	high mobility group protein 1 [Azumapecten farreri]	102540	246911	241877	489432	225894	304035	177207	227228	320842	152949	285207	184080
762111966	PREDICTED: neurabin-1-like isoform X1 [Crassostrea gigas]	268911	191388	149863	143173	250613	143840	141492	225669	124636	186364	146687	134995
762122991	PREDICTED: spectrin alpha chain-like isoform X7 [Crassostrea gigas]	956010	1.03043e+06	859070	1.13159e+06	1.12172e+06	938644	834330	883756	791337	984141	743613	810358
762090170	PREDICTED: neuronal calcium sensor 2-like [Crassostrea gigas]	145833	104084	85370.2	192542	185938	176848	122040	142372	130244	109936	97422.9	142298
762092822	PREDICTED: ribosome-binding protein 1-like isoform X12 [Crassostrea gigas]	668752	475759	529325	763534	817294	510868	498330	652117	547097	537278	404092	506452
345306629	PREDICTED: RNA-binding motif protein, X chromosome [Ornithorhynchus anatinus]	1.48026e+06	1.75032e+06	1.56028e+06	2.32315e+06	2.14425e+06	1.49482e+06	1.21081e+06	2.15077e+06	1.3188e+06	1.66899e+06	1.18471e+06	1.44114e+06
157818179	elongation factor 1-beta [Rattus norvegicus]	2.65006e+06	2.85327e+06	2.97335e+06	4.07187e+06	4.42003e+06	2.74159e+06	2.33737e+06	3.71713e+06	2.63337e+06	2.88501e+06	2.09899e+06	2.77879e+06
52346130	60S ribosomal protein L23a [Xenopus (Silurana) tropicalis]	1.1622e+06	1.04712e+06	960685	989452	1.06851e+06	854653	866330	1.00585e+06	801154	968252	635628	797189
762105376	PREDICTED: protein quaking-B-like isoform X5 [Crassostrea gigas]	227260	204240	198428	246859	232418	214400	158588	219910	181950	222005	146743	174921
762072073	PREDICTED: general transcription factor IIF subunit 1-like [Crassostrea gigas]	32491.7	25453.2	23739.3	27349.1	28873.3	16541	20058.2	31603.8	13741.1	23263.4	18987.1	21127.2
Q29243	DAG1_PIG Dystroglycan OS=Sus scrofa GN=DAG1 PE=2 SV=2	527659	330855	432152	467416	597267	546799	309401	514326	415824	406277	332958	440980
577147996	polyubiquitin-B [Plasmodium vinckei petteri]	131333	94819	60574.3	121156	107739	82541.7	78478.6	152538	57743	144908	6671.62	58111
676482685	hypothetical protein LOTGIDRAFT_128909, partial [Lottia gigantea]	636518	383028	390562	491746	564494	476655	417359	356286	432515	451869	379608	414435
699585553	PREDICTED: calmodulin-A-like [Apaloderma vittatum]	262342	207895	208711	307157	313155	209656	163032	299408	183580	239203	143573	227460
676429153	hypothetical protein LOTGIDRAFT_203414 [Lottia gigantea]	90812.1	86722.8	96749.8	89126.2	96256.1	96399	75826.4	81264.6	73678.9	87519.8	72211.8	72422.2
762131826	PREDICTED: E3 ubiquitin-protein ligase arih1-like [Crassostrea gigas]	55506.1	38648	48561.3	58355.1	50338.5	35275.7	40897.6	44465	36907.2	45697.5	30743.8	39931.6
780672647	PREDICTED: sortilin-related receptor-like isoform X1 [Wasmannia auropunctata]	116906	159835	151254	169979	192597	159901	113515	158255	143997	111259	124418	139062
377652574	SAM domain and HD domain-containing protein 1 [Nasalis larvatus]	284187	306977	105375	148831	49431.1	232997	100095	257123	79161.5	190237	269638	41228.6
325297110	fragile X mental retardation protein [Aplysia californica]	254155	254254	283344	273277	254779	262355	214006	213880	221075	233757	210563	221674
405978430	Calcyphosin-like protein [Crassostrea gigas]	52017.6	28130.9	28079.3	72049.4	57891.6	44672.6	35496	40039.9	45124.6	42559.7	26796	44727.3
576250929	mitogen-activated protein kinase p38 [Scylla paramamosain]	42866	47916.1	44672.9	97906.2	93785.1	53921.7	39615.6	68830.8	56199.2	54110	33188.5	64314.3
443695556	hypothetical protein CAPTEDRAFT_21125 [Capitella teleta]	170915	131434	141258	13049.9	175449	121034	117873	97529.9	95076.2	92600.6	113257	108538
157128477	AAEL011157-PA [Aedes aegypti]	388383	444625	345364	561389	566136	432132	300905	509427	349879	401667	290579	418857
405950801	La-related protein 1 [Crassostrea gigas]	99977.5	90043.2	85182.8	121341	78612.1	100670	64143.8	124924	74558.2	56421.4	71017.2	86380.7
676486625	hypothetical protein LOTGIDRAFT_207166 [Lottia gigantea]	763224	478045	469504	1.05179e+06	1.02889e+06	691672	484422	749187	629106	773252	384509	695901
871247218	PREDICTED: TOM1-like protein 2 isoform X3 [Aplysia californica]	88462	77626.1	90474.9	136367	152237	110812	85392	124930	87671.5	106235	49606.3	89885.1
762122357	PREDICTED: protein bicaudal D-like isoform X1 [Crassostrea gigas]	37914.3	31883.5	37877.8	53859.3	57609.5	29086.8	32110	35044	40837.3	30559.7	25114	42052.2
762150610	PREDICTED: alkaline phosphatase, tissue-nonspecific isozyme-like [Crassostrea gigas]	380539	410831	444680	226942	334525	282985	308907	285321	267265	266266	276995	318559
676427106	hypothetical protein LOTGIDRAFT_136131, partial [Lottia gigantea]	78069.5	61198.2	35198.1	115812	100350	76655.3	54863	86327.7	66084	62842.9	49091.2	67741.8
762142998	PREDICTED: protein scribble homolog isoform X7 [Crassostrea gigas]	58997.8	55612.9	83128.9	64512.1	61951.2	61834.8	59325.2	62012.6	54193.1	66704	57196.9	19996
405966464	Guanine nucleotide-binding protein subunit gamma-1 [Crassostrea gigas]	228720	224346	160398	226650	223009	165429	164704	238545	134525	197533	109329	171679
676449482	hypothetical protein LOTGIDRAFT_187854 [Lottia gigantea]	353072	282724	287012	331305	334620	276190	234766	306925	229623	281967	231102	255691
676468861	hypothetical protein LOTGIDRAFT_191571 [Lottia gigantea]	624278	451326	344224	451107	552274	357043	359028	471409	327316	409521	311178	416615
762170219	PREDICTED: heterochromatin protein 1-binding protein 3-like [Crassostrea gigas]	317776	301459	267351	328976	299907	312350	251255	287026	230958	253342	240496	245649
762142480	PREDICTED: epsin-2-like isoform X3 [Crassostrea gigas]	28691.8	14253.4	22942.5	30527	32267.8	23116.1	14057.8	27899.4	21311.2	21455.8	16639.7	23896.9
266616	NF60_DORPE RecName: Full=60 kDa neurofilament protein; Short=NF60 [Doryteuthis pealeii]	53917.5	65436.5	40349.8	60394.5	73485.8	57609.7	46435.6	54041.6	37222.3	57881.7	42049.2	52099.9
762106715	PREDICTED: B-cell receptor-associated protein 31-like [Crassostrea gigas]	57276.8	36955.6	51607.3	36299.5	33055	41698.5	29799.3	36648.9	41155.8	29607.2	33780.3	40827.9
524865797	PREDICTED: endophilin-A3-like isoform X3 [Aplysia californica]	98099.2	74794.1	74640.7	101047	92352.7	73808.4	64605.6	82480.9	67212.5	69509.6	66648.8	73701.1
676457360	hypothetical protein LOTGIDRAFT_227355 [Lottia gigantea]	1.15456e+06	1.1299e+06	911725	1.39459e+06	1.49422e+06	1.17593e+06	902793	1.32811e+06	947920	1.14013e+06	572604	1.086e+06
676460331	hypothetical protein LOTGIDRAFT_228660 [Lottia gigantea]	5790.96	9410.76	10383.6	2603.23	14020.4	8997.97	4879.77	9619.85	7679.32	7821.41	4711.58	7437
554862164	PREDICTED: collagen alpha-1(VII) chain-like [Haplochromis burtoni]	287682	298871	303834	288479	338682	332757	269259	255912	266436	226991	221819	281803
405950379	Protein phosphatase 1 regulatory subunit 12A [Crassostrea gigas]	35391.1	23221.3	24142.2	39170.5	48805.4	25601.7	20600.9	39587.6	26272.8	32786.5	20717.9	21457.4
170592090	thioredoxin [Brugia malayi]	78340.4	90408.9	125367	80300.2	65797.4	90627.4	69072.2	76630.9	74305.2	86843.9	69567.6	59922.6
676485505	hypothetical protein LOTGIDRAFT_154924 [Lottia gigantea]	190493	105912	93624.5	263075	247005	158256	110780	185012	137140	161732	115672	159286
762114473	PREDICTED: deoxyhypusine hydroxylase-like [Crassostrea gigas]	319755	288134	271290	421552	351841	358512	264022	271255	285271	327406	244408	259656
405971473	Cytoplasmic dynein 1 light intermediate chain 1 [Crassostrea gigas]	502818	261789	242564	280144	266285	265198	269862	188099	243314	282932	238597	269928
762148975	PREDICTED: zinc finger CCHC domain-containing protein 8-like [Crassostrea gigas]	5914.35	15778.1	9943.24	15220.6	11669.6	22742.1	5922.15	11667.7	19889.5	6616.76	5386.57	17197.3
126697378	mitochondrial ATP synthase delta chain [Haliotis discus discus]	1.69544e+06	1.57163e+06	1.46571e+06	2.1581e+06	2.36874e+06	1.50929e+06	1.19343e+06	2.05765e+06	1.26884e+06	1.45917e+06	1.23306e+06	1.59917e+06
871274397	PREDICTED: titin-like [Aplysia californica]	70356.4	65535.1	86593.8	62240.2	32047.4	62985.5	70698.2	22306.3	28296.4	26668.7	69330.1	92498.4
524884741	PREDICTED: polyadenylate-binding protein 2-B-like [Aplysia californica]	347415	404624	354759	451925	460838	378353	298878	402219	309744	330880	296255	317519
Q2HJ81	TBB6_BOVIN Tubulin beta-6 chain OS=Bos taurus GN=TUBB6 PE=2 SV=1	1.8325e+06	1.62651e+06	2.07655e+06	1.39912e+06	1.60901e+06	1.30188e+06	1.344e+06	1.42017e+06	1.24392e+06	1.20002e+06	1.43813e+06	1.37974e+06
74820990	CPLX_DORPE RecName: Full=Complexin; AltName: Full=Synaphin; Flags: Precursor [Doryteuthis pealeii]	1.28422e+06	1.06838e+06	786034	1.34234e+06	1.22874e+06	879199	673207	1.33618e+06	820802	917612	736064	873512
443708545	hypothetical protein CAPTEDRAFT_186176 [Capitella teleta]	1.51067e+06	1.17447e+06	1.10741e+06	3.33383e+06	2.98491e+06	1.52691e+06	1.06471e+06	2.56796e+06	1.55659e+06	1.79902e+06	764965	1.70808e+06
115390	CABO_DORPE RecName: Full=Squidulin; AltName: Full=Optic lobe calcium-binding protein; AltName: Full=SCABP [Doryteuthis pealeii]	3.16706e+06	3.20442e+06	2.15706e+06	4.43886e+06	5.11733e+06	2.76161e+06	2.25501e+06	4.37473e+06	2.67917e+06	2.797e+06	2.21993e+06	2.60961e+06
676472430	hypothetical protein LOTGIDRAFT_84087, partial [Lottia gigantea]	70139.2	46727.1	38521	80992.1	73269.6	49144.7	38439	65155.9	50121.9	62140.7	34165.7	41453.8
762119873	PREDICTED: transcriptional regulator ATRX-like isoform X1 [Crassostrea gigas]	30421.8	19370	22774.3	22614.8	29524.6	16586.3	18890.2	25522.8	18459.6	21934	15947.5	14025.6
241017244	stathmin [Octopus vulgaris]	32481.5	28754.6	32830.9	62295.4	58764.2	34581.2	29550.8	45881.8	30447.7	35006.9	27692.4	34190.4
143346991	Elav [Platynereis dumerilii]	288820	302272	305291	192152	200617	214392	206465	202477	183380	201996	232955	193557
762142838	PREDICTED: protein phosphatase inhibitor 2-like [Crassostrea gigas]	39346.6	31358.8	29695	41197.1	45059.5	29717.7	18994.7	51903.5	21553.7	23160.1	25493	34496.3
817737473	hypothetical protein AK88_00621 [Plasmodium fragile]	185700	133282	154848	201484	180398	118840	113360	201698	113392	113051	105340	143569
676496561	hypothetical protein LOTGIDRAFT_223566 [Lottia gigantea]	737352	915043	828592	1.51366e+06	1.5042e+06	1.04642e+06	746364	1.14673e+06	813892	1.00461e+06	663482	933298
871259492	PREDICTED: uncharacterized protein LOC101847901 [Aplysia californica]	23483.3	3379.2	18242.8	27430.2	28202.1	43957.6	30807.6	16052.4	14034.4	18634.8	14408.8	23373.2
83415124	uncharacterized protein LOC562839 [Danio rerio]	710447	553428	531433	926581	905262	631944	459220	812848	543090	605862	421699	606443
524871443	PREDICTED: forkhead box protein K2-like [Aplysia californica]	20531.4	17656.3	20462	24425.4	26143.6	17394.8	19502.8	19097.2	13668.3	19827.5	13808.6	16616.7
405971182	MAP kinase-activating death domain protein [Crassostrea gigas]	3628.53	3431.25	2882.19	820.652	175.587	4370.18	2117.16	2881.7	2937.8	2013.62	1152.15	1258.88
676480897	hypothetical protein LOTGIDRAFT_210667 [Lottia gigantea]	372627	202180	369729	251012	261268	216700	144553	465966	145373	203321	243751	146533
576644009	sepiatocin precursor [Sepia officinalis]	130541	108606	76349.6	195956	210972	136902	97764.3	170005	117022	102205	75622.3	129946
675388979	heat- and acid-stable phosphoprotein, partial [Stegodyphus mimosarum]	295649	226534	218344	411672	420809	236111	174610	369926	229612	267212	180406	234312
676448283	hypothetical protein LOTGIDRAFT_152943 [Lottia gigantea]	72359.9	83387.9	64343.9	66263.1	76231.6	64135.5	49983.8	70934.6	48511.4	56596	50756.4	66422.3
241913776	ribosomal protein S12 [Pinctada maxima]	2.45677e+06	3.01612e+06	2.63596e+06	2.94688e+06	3.16928e+06	2.21257e+06	2.27129e+06	2.67221e+06	1.99315e+06	2.40245e+06	1.66221e+06	2.21679e+06
871214476	PREDICTED: uncharacterized protein LOC101851628 [Aplysia californica]	27383.4	33208.3	39906.6	12871.5	14104.1	19163	16242.2	13093.2	20129.2	21192	23140.3	24096.9
443684707	hypothetical protein CAPTEDRAFT_89350 [Capitella teleta]	88819	102199	100736	153758	146363	113765	68496.2	131835	91252.2	100389	72846.3	102337
762145329	PREDICTED: ubiquitin-like domain-containing CTD phosphatase 1 [Crassostrea gigas]	39877.8	42358.2	34692.7	76788.4	45580.4	48082.1	24133.8	51646.6	41013	46037.7	30405	37720
524913816	PREDICTED: heterogeneous nuclear ribonucleoprotein A1-like isoform X1 [Aplysia californica]	3.14718e+06	3.00028e+06	3.0003e+06	4.93049e+06	4.74884e+06	3.60697e+06	2.58777e+06	3.71007e+06	3.12548e+06	2.81447e+06	2.69482e+06	3.08147e+06
676492133	hypothetical protein LOTGIDRAFT_222631 [Lottia gigantea]	77403.7	56546.6	51003.1	45285.2	45517.6	52592.1	54641.8	36361.4	38081.6	39456.7	60464.8	34590.6
524896689	PREDICTED: NADH dehydrogenase [ubiquinone] 1 alpha subcomplex subunit 8-like [Aplysia californica]	411884	273002	276615	483765	442250	314851	219373	450770	276847	328362	212011	280186
405970058	Eukaryotic translation initiation factor 3 subunit A [Crassostrea gigas]	1.07141e+06	1.02259e+06	1.06953e+06	1.39217e+06	1.24747e+06	1.04662e+06	925629	996832	871736	1.12073e+06	718244	861982
524898322	PREDICTED: flap endonuclease 1-like [Aplysia californica]	110222	120268	116199	144566	134827	107057	104485	126718	77926.1	120276	74004	84565.7
676455118	hypothetical protein LOTGIDRAFT_215051 [Lottia gigantea]	20933.1	17307.4	19938.8	20212.8	18926.9	10638.8	11835.4	24303.1	19357.8	13717.5	1785.27	15571.8
405975372	hypothetical protein CGI_10026945 [Crassostrea gigas]	633597	443200	380506	578544	700505	426251	287539	655652	391466	514248	275411	411482
871267727	PREDICTED: PDZ and LIM domain protein 7-like isoform X1 [Aplysia californica]	1.02391e+06	819964	1.06705e+06	684185	657423	878223	746700	438268	668931	703465	917502	632734
159741	omega-crystallin [Enteroctopus dofleini]	4.30615e+06	1.7066e+06	1.5527e+06	6.50629e+06	5.46251e+06	4.96958e+06	2.67703e+06	2.5409e+06	3.66548e+06	4.03027e+06	2.4454e+06	4.24992e+06
405960687	Host cell factor [Crassostrea gigas]	28354.9	20014.2	1757.13	21764.2	25334.5	2473.14	11889.5	19068.4	12574.6	12526.4	11526	12196.8
483523815	Cathepsin Z, partial [Anas platyrhynchos]	322675	78419.2	83874.4	134438	138023	113321	93169.2	114042	108754	143429	104551	132766
443697718	hypothetical protein CAPTEDRAFT_154791 [Capitella teleta]	108492	56349	45371.4	185338	193903	109181	70981.2	127435	92294	125741	49303.8	92697
260799776	hypothetical protein BRAFLDRAFT_124447 [Branchiostoma floridae]	47920.6	29062.9	28083.2	40204.6	44033.1	35030.1	24604.8	37776.1	27531.9	42225.8	20119.9	27059.1
443716636	hypothetical protein CAPTEDRAFT_163399 [Capitella teleta]	536957	391865	407963	496968	582461	360926	312741	594428	315656	389815	246593	359930
762131939	PREDICTED: mitochondrial fission 1 protein-like isoform X1 [Crassostrea gigas]	63909	97025.6	75850.6	160912	125819	81043.3	68954.1	128240	62274.7	91756.7	51297	80246.2
Q61474	MSI1H_MOUSE RNA-binding protein Musashi homolog 1 OS=Mus musculus GN=Msi1 PE=1 SV=1	44028.2	47311.6	48228.4	44445.6	46820.6	36668.7	28033.5	50080.6	31965.9	35193.7	30598.5	37624.1
126697400	putative mitochondrial ATP synthase [Haliotis discus discus]	5.82203e+06	5.36756e+06	4.2232e+06	7.71335e+06	7.43627e+06	5.66287e+06	3.71075e+06	7.13988e+06	4.68488e+06	5.44306e+06	3.40437e+06	4.50494e+06
762161060	PREDICTED: zinc finger homeobox protein 4-like isoform X1 [Crassostrea gigas]	45490.6	64497.7	69120.8	75155.1	82737	54995	56485.4	54888.2	45175.5	48650.9	54983.3	52368.3
385145416	alpha tubulin 6 [Sepia officinalis]	174356	208624	263101	151553	152224	181223	168097	99273.6	152307	132828	150040	198245
762115623	PREDICTED: FCH and double SH3 domains protein 2-like isoform X6 [Crassostrea gigas]	109007	97810.3	72297.2	115526	108756	92009.3	61837.3	111970	72211	82695.6	71778.6	73661.1
762083280	PREDICTED: cysteine-rich with EGF-like domain protein 2-B isoform X1 [Crassostrea gigas]	640001	800548	744615	1.07753e+06	1.09726e+06	658437	597041	944487	563686	662966	524199	702971
524911475	PREDICTED: T-complex protein 1 subunit beta-like [Aplysia californica]	3.00635e+06	2.27996e+06	2.36547e+06	2.79867e+06	2.68109e+06	2.19346e+06	1.97826e+06	2.21086e+06	1.93315e+06	2.35478e+06	1.70556e+06	2.01125e+06
871243636	PREDICTED: mucin-5AC-like [Aplysia californica]	273297	323412	254242	338379	390751	240107	207444	343432	220811	226574	221220	228122
762103546	PREDICTED: poly(rC)-binding protein 3-like isoform X3 [Crassostrea gigas]	295981	257467	255561	287194	334236	248926	204791	278919	190581	236576	189663	234130
126697332	calcineurin B [Haliotis discus discus]	313560	270868	150451	298188	327141	234547	223957	281621	194082	258778	104081	204805
P57759	ERP29_MOUSE Endoplasmic reticulum resident protein 29 OS=Mus musculus GN=Erp29 PE=1 SV=2	152806	158180	143573	185736	170432	278739	175530	167193	113072	232234	89858.3	87870.3
530623668	PREDICTED: fatty-acid amide hydrolase 2 isoform X1 [Chrysemys picta bellii]	14360.6	17302.2	13730.7	5347.51	34466.1	13260.3	21897.6	14615.4	13634.3	4874.33	17280.8	5931.21
301622459	PREDICTED: barrier-to-autointegration factor [Xenopus (Silurana) tropicalis]	198663	131876	129511	204494	224725	173051	122406	167108	128990	168445	100645	156405
676490918	hypothetical protein LOTGIDRAFT_168891 [Lottia gigantea]	6078.37	5896.63	5931.09	7054.85	6216.52	5313.81	3294.11	7335.51	4037.63	5022.49	4259.49	5041.67
676485505	hypothetical protein LOTGIDRAFT_154924 [Lottia gigantea]	234259	101367	92969.7	300333	264219	176138	106921	223104	160509	169296	90315.1	178071
762131067	PREDICTED: programmed cell death protein 6-like isoform X2 [Crassostrea gigas]	532839	464307	451031	835104	726381	620315	373982	547239	454915	534082	352532	618532
675885622	hypothetical protein HELRODRAFT_180780 [Helobdella robusta]	31570	8814.88	169982	32462.9	214676	163707	152779	22749.3	152286	16248.3	24648.2	124287
762133645	PREDICTED: nascent polypeptide-associated complex subunit alpha-like [Crassostrea gigas]	661736	648986	632259	955770	1.10085e+06	645281	557477	802433	590945	611307	509324	614346
668458378	hypothetical protein ZHAS_00014279 [Anopheles sinensis]	3.03385e+06	2.28114e+06	1.78573e+06	3.24321e+06	3.34423e+06	2.01425e+06	1.45789e+06	3.31866e+06	1.85262e+06	2.18428e+06	1.54461e+06	2.09587e+06
161292	neurofilament protein [Doryteuthis pealeii]	28652.7	24423.3	20517.7	30943.7	30910.6	34631.3	15584	33193.8	24230.5	18029	17059.9	26780.4
762143522	PREDICTED: neo-calmodulin-like isoform X1 [Crassostrea gigas]	530572	377035	315701	687342	602616	482573	320490	477234	416896	468259	282418	407141
568252012	OCIA domain-containing protein 1 [Anopheles darlingi]	39817.3	25012.4	28954.2	37259.8	41122.4	29217.4	20838.5	38492.6	31026.3	21519.2	19141.7	28319.2
676428763	hypothetical protein LOTGIDRAFT_94316, partial [Lottia gigantea]	1.7827e+06	1.86038e+06	1.80268e+06	1.92868e+06	2.02135e+06	1.69079e+06	1.24212e+06	1.98299e+06	1.32192e+06	1.4819e+06	1.31417e+06	1.42722e+06
524907404	PREDICTED: serine/threonine-protein kinase 3-like isoform X2 [Aplysia californica]	44149.1	53778.6	49738.4	77557.9	73467.1	65315	43836.9	61877.2	45359.8	62694.8	28495.4	45686.5
405962245	Neuronal membrane glycoprotein M6-b [Crassostrea gigas]	518871	518310	441375	480595	425518	508830	453299	369911	369461	335709	391891	366196
762104107	PREDICTED: stress-induced-phosphoprotein 1-like [Crassostrea gigas]	1.23495e+06	910218	909615	1.23539e+06	1.45302e+06	1.01787e+06	807245	1.05787e+06	897004	1.03614e+06	644120	898500
762107887	PREDICTED: nuclear pore complex protein Nup93-like [Crassostrea gigas]	51156.8	54796.1	52426.5	57114.7	49137.4	41125.6	40951	30573.6	40182.8	52126.5	35186.9	42446.3
524888474	PREDICTED: heterogeneous nuclear ribonucleoprotein D-like-B isoform X1 [Aplysia californica]	467315	466622	437153	380468	424925	347166	332277	420962	283842	321444	314482	319545
762078017	PREDICTED: exportin-1-like [Crassostrea gigas]	30200.7	37519.1	27787.3	30066	27918.9	35627.8	28267.4	10921.3	27518	34200.5	26411.9	21985.5
307170257	SUMO-conjugating enzyme UBC9 [Camponotus floridanus]	62963	66465.3	43387.5	90536.8	74540.3	74396.7	64532.1	37987.5	43451.9	63786.1	58968.1	56731.9
405952168	La-related protein 4 [Crassostrea gigas]	57115.8	36507	46607.6	73664.1	63574.7	40302.7	35863.3	51494.3	38953.5	47936.2	30741	45789.6
524906144	PREDICTED: uncharacterized protein LOC101857145 isoform X2 [Aplysia californica]	569284	449074	456256	653705	582023	498347	364784	534601	371036	454721	343609	462688
871268837	PREDICTED: cyclin-G-associated kinase-like [Aplysia californica]	37262.9	21427.4	31685.1	45344.1	40171.9	36295.3	19552.1	33491.9	28551	32988.4	21100.4	31599.7
762141356	PREDICTED: small nuclear ribonucleoprotein G-like [Crassostrea gigas]	190418	230435	226188	178313	207313	153568	152605	217655	123213	149171	110503	181905
676435774	hypothetical protein LOTGIDRAFT_139359 [Lottia gigantea]	57259.9	52553.8	54831.7	50563.5	52200.3	58432.5	39797.7	45331.7	43794	54069.5	31207.3	42623.8
573890431	PREDICTED: mitochondrial import inner membrane translocase subunit Tim8 A-like [Lepisosteus oculatus]	223046	169953	135047	270120	306764	161666	132229	273875	147975	172884	106528	164318
260789520	hypothetical protein BRAFLDRAFT_60179 [Branchiostoma floridae]	650834	502994	453645	779700	833022	569071	423543	668428	504811	524182	348398	515534
358253754	cell division cycle protein 37 [Clonorchis sinensis]	217949	151359	125809	226232	250618	188076	117730	198949	159203	176751	108963	152050
Q4A0V8	UAFA_STAS1 Uro-adherence factor A OS=Staphylococcus saprophyticus subsp. saprophyticus (strain ATCC 15305 / DSM 20229) GN=uafA PE=1 SV=1	479736	339483	324400	599913	567508	372479	264420	546929	339875	351054	243854	366963
556972470	PREDICTED: myosin regulatory light polypeptide 9 isoform X1 [Latimeria chalumnae]	450363	280975	250283	601225	584876	400271	309482	369333	351628	410577	240291	337945
405954873	hypothetical protein CGI_10002658 [Crassostrea gigas]	110140	114373	130427	63750.7	54397.4	107148	94563.4	45357.3	63956.3	68824.1	96793.7	86176.6
676444223	hypothetical protein LOTGIDRAFT_158663 [Lottia gigantea]	1.57889e+06	394298	472677	2.37868e+06	2.17013e+06	2.27289e+06	920059	1.01548e+06	1.51206e+06	1.40307e+06	662027	1.7627e+06
762122993	PREDICTED: spectrin alpha chain-like isoform X8 [Crassostrea gigas]	4.92439e+06	4.2868e+06	4.0186e+06	5.86567e+06	5.95629e+06	4.65505e+06	3.7023e+06	4.56733e+06	3.79269e+06	4.29434e+06	3.16418e+06	3.78646e+06
260803876	hypothetical protein BRAFLDRAFT_130590 [Branchiostoma floridae]	73936.3	48902.3	44744.9	101756	86970.8	59996.2	64216.2	65372.8	50625.2	44484.7	56991.9	44900.5
762106689	PREDICTED: uncharacterized abhydrolase domain-containing protein DDB_G0269086-like isoform X4 [Crassostrea gigas]	217697	153307	150813	282202	268970	189428	126981	239905	165975	168765	121159	165956
780104901	PREDICTED: traB domain-containing protein [Strongylocentrotus purpuratus]	61228.2	56310.2	52982.2	80416.3	77223.9	40847	43081	82217.4	49250.7	40666.8	28567.3	45131.3
762163028	PREDICTED: transcription elongation regulator 1-like isoform X1 [Crassostrea gigas]	213796	236539	256272	429485	403996	305498	190225	287748	249193	301970	171417	244325
762150708	PREDICTED: succinate dehydrogenase assembly factor 4, mitochondrial-like [Crassostrea gigas]	26131.8	34028	26555.5	35367.8	43729.8	21581	17234.6	39866.7	19991.8	27436.9	18409.1	23729.5
156400995	predicted protein [Nematostella vectensis]	49169.9	74619	65772.4	91850.5	96046.5	57096.1	48845.2	71801.4	43822.4	63519.7	49111.8	62420.8
405973648	Pericentriolar material 1 protein [Crassostrea gigas]	37415	32845.8	31089.5	52962.4	47912.3	30724.6	24395.4	41357.4	22586.6	38404.2	19770.5	35423.8
762151104	PREDICTED: uncharacterized abhydrolase domain-containing protein DDB_G0269086-like isoform X4 [Crassostrea gigas]	361811	215635	224340	353451	323060	253713	193368	284833	202027	257883	185442	228259
762085926	PREDICTED: mucin-17-like [Crassostrea gigas]	217799	129800	145672	147775	173633	394076	124272	127450	129539	173380	157828	230897
574990296	hypothetical protein PFMALIP_00476 [Plasmodium falciparum MaliPS096_E11]	289373	206723	194722	332801	313722	218647	145078	305428	171707	182850	179285	229523
762116485	PREDICTED: presenilin-1-like [Crassostrea gigas]	26990.3	20938.4	20530.9	42072	33382.7	32052.9	16441.6	26256.9	25241.5	27645.9	19573.6	22099.5
762164587	PREDICTED: SWI/SNF complex subunit SMARCC2-like isoform X6 [Crassostrea gigas]	178811	143430	176372	135377	158718	121874	114953	142446	106925	119924	110209	118762
524892173	PREDICTED: heterogeneous nuclear ribonucleoprotein A1-like [Aplysia californica]	1.17448e+06	773650	798522	1.24246e+06	1.05614e+06	812933	916420	882463	652016	501747	721103	890761
859779831	PREDICTED: glucosidase 2 subunit beta isoform X3 [Mustela putorius furo]	1.20721e+06	900454	788203	1.45171e+06	1.56266e+06	843314	669840	1.29535e+06	782473	941763	598353	968960
762114431	PREDICTED: peroxidasin-like isoform X1 [Crassostrea gigas]	4222.51	2716.74	3545.85	3372.82	2841.06	3736.05	2247.71	2358.56	1590.89	2988.12	3073.99	3643.52
260818256	hypothetical protein BRAFLDRAFT_115113 [Branchiostoma floridae]	736969	583100	469731	832550	867020	512203	417467	802602	468942	593827	317001	512239
676467024	hypothetical protein LOTGIDRAFT_233455 [Lottia gigantea]	36126.9	41033.3	35334.8	52863.4	50070	37183.6	31910.8	42070.2	31413	38066.9	23696.8	29205.4
676495224	hypothetical protein LOTGIDRAFT_134504 [Lottia gigantea]	281685	584972	516318	203950	1.62887e+06	1.1144e+06	636244	334145	565229	544229	736774	542270
762135523	PREDICTED: histone-binding protein N1/N2-like [Crassostrea gigas]	394994	303960	253130	389168	374957	291922	233269	330517	243829	273693	211560	262335
470440973	IgA-specific serine endopeptidase [Acanthamoeba castellanii str. Neff]	763503	627242	583715	853266	882055	576138	418065	784794	480102	591111	480713	563052
Q91XD4	FTCD_MOUSE Formimidoyltransferase-cyclodeaminase OS=Mus musculus GN=Ftcd PE=1 SV=1	46256.4	86585.1	120170	56034.8	72516.4	76905.5	62349.4	51222.1	64170.5	55639	87316.4	34071.6
657543162	PREDICTED: microtubule-associated protein RP/EB family member 3 isoform X1 [Stegastes partitus]	884362	780280	774766	1.31627e+06	1.21724e+06	1.00982e+06	676633	974167	774995	875761	579589	740241
805792532	PREDICTED: LOW QUALITY PROTEIN: titin-like [Megachile rotundata]	124782	131243	109768	137453	150332	132663	86234.4	137963	85736.1	102495	85033.4	109118
762135519	PREDICTED: histone-binding protein N1/N2-like isoform X1 [Crassostrea gigas]	81677.6	30970.1	31222.1	99705.5	4440.76	68995.9	54864.1	86754.5	5612.26	3884.34	37804.9	55495.8
Q54NE6	PGAM_DICDI Probable phosphoglycerate mutase OS=Dictyostelium discoideum GN=gpmA PE=1 SV=1	5.72777e+06	6.67934e+06	7.02716e+06	7.72856e+06	7.23109e+06	7.47333e+06	4.69854e+06	5.1627e+06	5.34476e+06	6.33259e+06	4.96466e+06	5.73413e+06
291225390	PREDICTED: dynactin subunit 2-like isoform X1 [Saccoglossus kowalevskii]	143967	116529	94446.8	157643	171260	108394	76116.3	155311	86019.7	109118	80174.8	103244
762085731	PREDICTED: serrate RNA effector molecule homolog isoform X3 [Crassostrea gigas]	48705.5	53618.9	48129.9	38843.6	47148.4	38038.8	36373.5	41551.4	31837.9	39285	30490.3	31793.6
405974726	U1 small nuclear ribonucleoprotein A [Crassostrea gigas]	292784	255078	191427	315865	291275	211554	184563	299287	170797	240942	139028	163090
405966815	hypothetical protein CGI_10014470 [Crassostrea gigas]	8556.81	12978.1	14398.1	3589.68	5879.06	13537.6	10592	8720.87	8640.51	6462.55	2259.76	8596.48
871243339	PREDICTED: latrophilin-1-like [Aplysia californica]	50825	31854.2	34699.5	29757.4	40309.7	37298.2	25115.1	32388.3	28265.8	30753.1	23631.9	32469.7
752864514	PREDICTED: ATP synthase subunit e, mitochondrial [Camponotus floridanus]	452068	388811	283341	549686	487010	239185	380641	473311	195219	299953	176315	317141
573881219	PREDICTED: acidic leucine-rich nuclear phosphoprotein 32 family member A-like isoform X2 [Lepisosteus oculatus]	3.68429e+06	2.61159e+06	2.52216e+06	3.71969e+06	4.31373e+06	3.16693e+06	2.13218e+06	3.46093e+06	2.30501e+06	3.11951e+06	1.87141e+06	2.47429e+06
443695383	hypothetical protein CAPTEDRAFT_153835 [Capitella teleta]	663129	520116	430640	771769	676003	544653	385985	569904	402774	575870	335405	496046
676473175	hypothetical protein LOTGIDRAFT_234262 [Lottia gigantea]	85853.7	51151.3	57743.9	125025	107980	81629.6	46167.5	82136.2	69867.8	75288.3	46829.3	70293.1
577029959	proteasomal ubiquitin receptor adrm1, partial [Biomphalaria glabrata]	179759	144387	144890	210685	225544	135010	102289	197324	114524	134087	102292	147009
524882642	PREDICTED: ralBP1-associated Eps domain-containing protein 1-like isoform X1 [Aplysia californica]	24961	18041	20747	33383.3	34575.6	29350.6	19502.6	21663.5	22975.6	23610.4	14972.7	20737.6
348514674	PREDICTED: glutathione S-transferase Mu 3-like [Oreochromis niloticus]	4.12641e+06	3.26856e+06	3.20146e+06	5.11857e+06	5.05415e+06	4.49246e+06	2.9071e+06	3.31583e+06	3.56044e+06	3.69686e+06	2.82164e+06	3.01183e+06
524913816	PREDICTED: heterogeneous nuclear ribonucleoprotein A1-like isoform X1 [Aplysia californica]	3.37093e+06	3.53244e+06	3.26585e+06	3.70849e+06	3.61423e+06	2.95111e+06	2.14782e+06	3.64344e+06	2.29435e+06	2.66088e+06	2.22661e+06	2.65576e+06
657757959	PREDICTED: protein FAM83B-like isoform X2 [Cynoglossus semilaevis]	24695.6	17017.8	15323.9	30052.5	29774.7	21160.6	18315.5	23984.8	12901.1	16857.6	15536	17900.6
762110086	PREDICTED: PDZ and LIM domain protein 3-like isoform X2 [Crassostrea gigas]	377096	292518	312000	332151	232679	464775	254423	221611	272002	230019	274716	283044
212169133	NP2 [Octopus kaurna]	34229.1	46066.3	46478.2	38554	38414.7	36834.4	34007.8	53212.8	22472.8	17161.5	24892.8	31957.9
676451297	hypothetical protein LOTGIDRAFT_174762 [Lottia gigantea]	66522.5	72517.1	55845.7	90011.8	79790.3	55290.8	41125.5	78521.4	47188.2	63050.9	43244.2	46957.7
443731158	hypothetical protein CAPTEDRAFT_182031 [Capitella teleta]	802827	632468	664819	781542	517301	290770	742212	646847	277497	327761	269807	546876
762110088	PREDICTED: PDZ and LIM domain protein 7-like isoform X1 [Crassostrea gigas]	1.29375e+06	1.21173e+06	1.22705e+06	2.05672e+06	1.64409e+06	1.6464e+06	945483	1.45585e+06	1.22594e+06	1.23544e+06	929014	1.12323e+06
524901267	PREDICTED: transcription elongation factor S-II-like [Aplysia californica]	159139	123404	128997	174769	170911	133804	101643	146355	111653	108393	94841.9	115606
675870050	hypothetical protein HELRODRAFT_157245 [Helobdella robusta]	1.87048e+06	1.38063e+06	1.3279e+06	2.15202e+06	2.2733e+06	1.62614e+06	1.04405e+06	1.88275e+06	1.33008e+06	1.37408e+06	1.13194e+06	1.32317e+06
37700237	translationally-controlled tumor protein homolog [Danio rerio]	2.6422e+06	2.01603e+06	1.85607e+06	3.81014e+06	3.80462e+06	2.24117e+06	1.76812e+06	2.9619e+06	1.88446e+06	2.43379e+06	1.26937e+06	2.11597e+06
405974177	Tubulin polymerization-promoting protein family member 2 [Crassostrea gigas]	56785.2	56887.1	53695	86274	80738.6	56308.1	39899.1	71174.8	46651	44610.4	45918.6	48476.9
823327709	chitin binding beak protein 2 [Dosidicus gigas]	25071.1	32723	15587	30982.6	44487.9	21190.4	15757.7	22569.5	26242.2	21863.8	19228.9	23465
555956361	PREDICTED: c-Jun-amino-terminal kinase-interacting protein 4 isoform X1 [Bos mutus]	249632	193363	161282	222760	254094	190836	151173	177427	148490	193314	123391	171387
762132192	PREDICTED: DNA topoisomerase 2-alpha-like [Crassostrea gigas]	163516	143995	148956	194949	193855	130714	97979.5	106778	131794	132821	116271	154529
524878917	PREDICTED: uncharacterized protein LOC101849999 [Aplysia californica]	19139.5	19776	20669.7	54364.5	19700.3	20061.3	21651.9	19163.6	24545	19737.5	13957.9	17492.4
762084507	PREDICTED: LIM and SH3 domain protein Lasp-like isoform X7 [Crassostrea gigas]	100567	78686	61680.2	98835.7	79325.7	68351.8	57083.5	78955.3	65381.9	69261.6	44492.4	54131.9
676458833	hypothetical protein LOTGIDRAFT_215757 [Lottia gigantea]	192008	152907	110453	216832	188918	134957	84307.1	186084	119577	136024	116659	111916
657553256	PREDICTED: eukaryotic translation initiation factor 5A-1 [Stegastes partitus]	3.10302e+06	2.04161e+06	1.96649e+06	3.58341e+06	4.00125e+06	2.31547e+06	1.69651e+06	3.10237e+06	1.90049e+06	2.12336e+06	1.66991e+06	2.39301e+06
755975209	PREDICTED: papilin-like [Fopius arisanus]	44274.3	22560.1	26804	66655.2	42576.7	39514.3	35561.6	34308.1	31249.7	28116.3	29278.9	24994.5
[truncated: 343 more rows]

## Sheet: Supplementary Table 3B
Supplementary Table 3B. Differential abundance test for O. vulgaris of 20 days post-hatching paralarvae fed on Mix (OPM_20) vs Artemia (OPA_20) diet comparison. Fold changes, resulting p-values (Mann-Whithney test) and q-values for each of the 2,341 quantified proteins are shown.
gi/UniProt accession	Protein name [species]	Fold change (M vs A)	p-value	q-value
321468619	chymotrypsin-like protein [Daphnia pulex]	6.89468	0.0021645	0.0532537
501296606	ganglioside induced differentiation associated protein [Riptortus pedestris]	5.49445	0.132035	0.168628
676490520	hypothetical protein LOTGIDRAFT_203267 [Lottia gigantea]	3.66935	0.00865801	0.0668034
390360333	PREDICTED: retinol dehydrogenase 12 isoform X1 [Strongylocentrotus purpuratus]	3.39533	0.24026	0.233451
871250970	LIM and SH3 domain protein [Aplysia californica]	2.76935	0.00865801	0.0668034
23394916	AF484963_1 high mobility group protein 1 [Biomphalaria glabrata]	2.66692	0.0930736	0.144654
762089209	PREDICTED: arrestin domain-containing protein 3-like [Crassostrea gigas]	2.63616	0.0649351	0.119258
676447445	hypothetical protein LOTGIDRAFT_228209 [Lottia gigantea]	2.58021	0.025974	0.0842521
755981826	PREDICTED: serine/threonine-protein kinase mig-15 isoform X10 [Fopius arisanus]	2.55029	0.004329	0.055342
134281	SCRY3_ENTDO RecName: Full=S-crystallin 3; AltName: Full=OL3 [Enteroctopus dofleini]	2.38689	0.0930736	0.144654
755257709	heat shock protein 20 [Pinctada martensii]	2.34785	0.0151515	0.0726365
159741	omega-crystallin [Enteroctopus dofleini]	2.33929	0.393939	0.311324
557276463	PREDICTED: ADP-ribosylation factor-like protein 3 [Alligator sinensis]	2.32107	0.24026	0.233451
762129940	PREDICTED: titin-like isoform X6 [Crassostrea gigas]	2.22128	0.0021645	0.0532537
242020664	tyrosine-protein phosphatase corkscrew, putative [Pediculus humanus corporis]	2.19641	0.818182	0.489396
871214476	PREDICTED: uncharacterized protein LOC101851628 [Aplysia californica]	2.14517	0.0151515	0.0726365
676423133	hypothetical protein LOTGIDRAFT_228067 [Lottia gigantea]	2.13793	0.00865801	0.0668034
134272	SCRY1_OCTVU RecName: Full=S-crystallin 1 [Octopus vulgaris]	2.13597	0.0151515	0.0726365
676460331	hypothetical protein LOTGIDRAFT_228660 [Lottia gigantea]	2.13114	0.132035	0.168628
405963231	hypothetical protein CGI_10019048 [Crassostrea gigas]	2.126	0.0151515	0.0726365
815907918	PREDICTED: SAFB-like transcription modulator isoform X1 [Bombus impatiens]	2.1167	0.004329	0.055342
678200283	Vitellogenin-2, partial [Picoides pubescens]	2.11193	0.004329	0.055342
405974565	RNA-binding protein 4 [Crassostrea gigas]	2.07009	0.00865801	0.0668034
546678931	hypothetical protein D910_06835 [Dendroctonus ponderosae]	2.06873	0.937229	0.531818
676492747	hypothetical protein LOTGIDRAFT_133731 [Lottia gigantea]	2.06399	0.004329	0.055342
676429203	hypothetical protein LOTGIDRAFT_203419 [Lottia gigantea]	2.05746	0.0151515	0.0726365
762106002	PREDICTED: uncharacterized protein LOC105334014 isoform X3 [Crassostrea gigas]	2.02352	0.0021645	0.0532537
Q9IBG7	KCP_XENLA Kielin/chordin-like protein OS=Xenopus laevis GN=kcp PE=2 SV=1	2.00006	0.004329	0.055342
354465052	PREDICTED: calmodulin-like protein 5 isoform X1 [Cricetulus griseus]	1.98537	0.132035	0.168628
524911068	PREDICTED: pumilio homolog 2-like isoform X3 [Aplysia californica]	1.97942	0.00865801	0.0668034
391347875	PREDICTED: histone H1.0-A-like [Metaseiulus occidentalis]	1.9793	0.00865801	0.0668034
762132835	PREDICTED: SH2 domain-containing adapter protein E-like isoform X1 [Crassostrea gigas]	1.97607	0.0411255	0.100424
405964948	Fructose-bisphosphate aldolase [Crassostrea gigas]	1.94665	0.24026	0.233451
762150796	PREDICTED: RNA-binding protein 25-like [Crassostrea gigas]	1.93794	0.025974	0.0842521
159741	omega-crystallin [Enteroctopus dofleini]	1.92498	0.24026	0.233451
557243715	nucleosome assembly protein, putative [Eimeria necatrix]	1.91569	0.0649351	0.119258
481044167	soluble guanylate cyclase alpha-like protein [Euprymna scolopes]	1.91296	0.0151515	0.0726365
566553581	myosin heavy chain isoform A [Octopus bimaculoides]	1.91003	0.0021645	0.0532537
762101023	PREDICTED: RNA binding protein fox-1 homolog 2-like isoform X9 [Crassostrea gigas]	1.90801	0.0021645	0.0532537
159741	omega-crystallin [Enteroctopus dofleini]	1.9072	0.393939	0.311324
488509554	SoxB1 [Sepia officinalis]	1.90669	0.025974	0.0842521
126322353	PREDICTED: KH domain-containing, RNA-binding, signal transduction-associated protein 3 [Monodelphis domestica]	1.89989	0.004329	0.055342
762132698	PREDICTED: cysteine-rich venom protein pseudechetoxin-like isoform X2 [Crassostrea gigas]	1.88189	0.393939	0.311324
524885451	PREDICTED: methionine aminopeptidase 2-like [Aplysia californica]	1.87894	0.132035	0.168628
260796497	hypothetical protein BRAFLDRAFT_120123 [Branchiostoma floridae]	1.87746	0.0930736	0.144654
212168866	S1 type peptidase [Octopus kaurna]	1.87035	0.309524	0.270516
260787370	hypothetical protein BRAFLDRAFT_238317 [Branchiostoma floridae]	1.8623	0.0151515	0.0726365
762142254	PREDICTED: ubiquitin-like [Crassostrea gigas]	1.86066	0.309524	0.270516
676487522	hypothetical protein LOTGIDRAFT_235987 [Lottia gigantea]	1.85851	0.0930736	0.144654
342160860	ataxin 2 [Octopus tankahkeei]	1.85649	0.0151515	0.0726365
676464369	hypothetical protein LOTGIDRAFT_233112 [Lottia gigantea]	1.85582	0.0151515	0.0726365
676449207	hypothetical protein LOTGIDRAFT_187724 [Lottia gigantea]	1.85193	0.00865801	0.0668034
443706878	hypothetical protein CAPTEDRAFT_117881, partial [Capitella teleta]	1.85131	0.179654	0.197025
676425479	hypothetical protein LOTGIDRAFT_211656 [Lottia gigantea]	1.83828	0.0021645	0.0532537
762122166	PREDICTED: lysine-specific demethylase 3A-like isoform X3 [Crassostrea gigas]	1.82322	0.0649351	0.119258
159006	peroxidase-like protein, partial [Euprymna scolopes]	1.81808	0.025974	0.0842521
405957901	hypothetical protein CGI_10026321 [Crassostrea gigas]	1.81653	0.0021645	0.0532537
562860286	PREDICTED: calmodulin-like protein 5 [Tupaia chinensis]	1.81333	0.393939	0.311324
498995139	PREDICTED: uncharacterized protein LOC101449652 [Ceratitis capitata]	1.81148	0.00865801	0.0668034
391347875	PREDICTED: histone H1.0-A-like [Metaseiulus occidentalis]	1.79882	0.0021645	0.0532537
675878194	hypothetical protein HELRODRAFT_193284 [Helobdella robusta]	1.79629	0.0151515	0.0726365
7416981	AF183909_3 catchin [Argopecten irradians]	1.78908	0.025974	0.0842521
871264367	PREDICTED: uncharacterized protein LOC101853496 isoform X7 [Aplysia californica]	1.77875	0.0411255	0.100424
375073583	Divalent cation tolerant protein CUTA, partial [Ostrea edulis]	1.7776	0.179654	0.197025
762111595	PREDICTED: plasminogen activator inhibitor 1 RNA-binding protein-like isoform X2 [Crassostrea gigas]	1.76669	0.0151515	0.0726365
762150014	PREDICTED: small acidic protein-like [Crassostrea gigas]	1.75509	0.0930736	0.144654
134272	SCRY1_OCTVU RecName: Full=S-crystallin 1 [Octopus vulgaris]	1.75177	0.0930736	0.144654
212374120	ribosomal protein [Mytilus galloprovincialis]	1.7443	0.0151515	0.0726365
699254894	PREDICTED: collagen alpha-6(VI) chain-like [Ciona intestinalis]	1.74385	0.132035	0.168628
645004167	PREDICTED: probable protein phosphatase CG10417 [Nasonia vitripennis]	1.74303	0.24026	0.233451
871219210	PREDICTED: fibril-forming collagen alpha chain [Aplysia californica]	1.74108	0.0151515	0.0726365
871220101	PREDICTED: protein lingerer-like isoform X4 [Aplysia californica]	1.73973	0.0151515	0.0726365
871243797	PREDICTED: uncharacterized protein LOC101860584 [Aplysia californica]	1.73084	0.0930736	0.144654
676466073	hypothetical protein LOTGIDRAFT_233352 [Lottia gigantea]	1.72982	0.004329	0.055342
871214992	PREDICTED: collagen alpha-1(XI) chain-like [Aplysia californica]	1.72868	0.004329	0.055342
871214838	PREDICTED: trithorax group protein osa-like isoform X4 [Aplysia californica]	1.72152	0.025974	0.0842521
50080844	tropomysin-like protein [Todarodes pacificus]	1.71506	0.025974	0.0842521
676431765	hypothetical protein LOTGIDRAFT_111061 [Lottia gigantea]	1.71098	0.025974	0.0842521
405961548	T-complex protein 1 subunit theta [Crassostrea gigas]	1.7086	0.309524	0.270516
50080844	tropomysin-like protein [Todarodes pacificus]	1.7079	0.0151515	0.0726365
676435708	hypothetical protein LOTGIDRAFT_139279, partial [Lottia gigantea]	1.70546	0.132035	0.168628
554884821	PREDICTED: UBX domain-containing protein 4-like isoform X2 [Haplochromis burtoni]	1.70382	0.132035	0.168628
762129970	PREDICTED: titin-like [Crassostrea gigas]	1.70121	0.0151515	0.0726365
134280	SCRY2_OCTVU RecName: Full=S-crystallin 2 [Octopus vulgaris]	1.70054	0.025974	0.0842521
134281	SCRY3_ENTDO RecName: Full=S-crystallin 3; AltName: Full=OL3 [Enteroctopus dofleini]	1.69804	0.0649351	0.119258
762074198	PREDICTED: tropomyosin isoform X7 [Crassostrea gigas]	1.69457	0.0411255	0.100424
762134391	PREDICTED: calponin-2-like isoform X2 [Crassostrea gigas]	1.69335	0.0151515	0.0726365
597757244	PREDICTED: annexin A11-like [Astyanax mexicanus]	1.68786	0.309524	0.270516
405951447	Virulence metalloprotease [Crassostrea gigas]	1.68783	0.393939	0.311324
676431223	hypothetical protein LOTGIDRAFT_137913 [Lottia gigantea]	1.68731	0.0151515	0.0726365
676478803	hypothetical protein LOTGIDRAFT_219822 [Lottia gigantea]	1.68136	0.0411255	0.100424
676484758	hypothetical protein LOTGIDRAFT_130231, partial [Lottia gigantea]	1.68027	0.0151515	0.0726365
762169310	PREDICTED: tRNA wybutosine-synthesizing protein 5-like [Crassostrea gigas]	1.67701	0.179654	0.197025
P00522	ABL_DROME Tyrosine-protein kinase Abl OS=Drosophila melanogaster GN=Abl PE=1 SV=3	1.67571	0.0411255	0.100424
327285294	PREDICTED: cathepsin Z-like [Anolis carolinensis]	1.67509	0.484848	0.351238
676454252	hypothetical protein LOTGIDRAFT_116635 [Lottia gigantea]	1.67434	0.0021645	0.0532537
212169133	NP2 [Octopus kaurna]	1.66568	0.025974	0.0842521
676450554	hypothetical protein LOTGIDRAFT_231723 [Lottia gigantea]	1.66086	0.0411255	0.100424
675219071	liver stage antigen 3, fragment, partial [Plasmodium chabaudi chabaudi]	1.6592	0.025974	0.0842521
123429255	hypothetical protein [Trichomonas vaginalis G3]	1.65668	0.0151515	0.0726365
762111487	PREDICTED: uncharacterized protein LOC105336001 [Crassostrea gigas]	1.65475	0.132035	0.168628
443694314	hypothetical protein CAPTEDRAFT_220985 [Capitella teleta]	1.65401	0.0411255	0.100424
254839632	C Chain C, Crystal Structure Of Rigor-Like Squid Myosin S1	1.64957	0.004329	0.055342
871238124	PREDICTED: zinc finger protein on ecdysone puffs-like isoform X3 [Aplysia californica]	1.6467	0.0411255	0.100424
676480681	hypothetical protein LOTGIDRAFT_229329 [Lottia gigantea]	1.64061	0.0151515	0.0726365
405975507	Disks large-associated protein 1 [Crassostrea gigas]	1.63968	0.0151515	0.0726365
821135801	PREDICTED: calmodulin-like [Dasypus novemcinctus]	1.63666	0.393939	0.311324
871207636	PREDICTED: leucine-rich repeat flightless-interacting protein 1-like isoform X2 [Aplysia californica]	1.63393	0.0151515	0.0726365
Q28247	CO4A5_CANLF Collagen alpha-5(IV) chain OS=Canis lupus familiaris GN=COL4A5 PE=2 SV=2	1.63337	0.393939	0.311324
443716139	hypothetical protein CAPTEDRAFT_221371 [Capitella teleta]	1.63332	0.0151515	0.0726365
370987917	beta-D-mannosidase [Aplysia kurodai]	1.63287	0.132035	0.168628
428230094	tropomyosin [Jasus lalandii]	1.63115	0.179654	0.197025
134272	SCRY1_OCTVU RecName: Full=S-crystallin 1 [Octopus vulgaris]	1.62985	0.025974	0.0842521
405952378	Eukaryotic translation initiation factor 4 gamma 2 [Crassostrea gigas]	1.62582	0.00865801	0.0668034
762093293	PREDICTED: transcription initiation factor IIA subunit 1-like isoform X1 [Crassostrea gigas]	1.6214	0.0930736	0.144654
676468132	hypothetical protein LOTGIDRAFT_209765 [Lottia gigantea]	1.61917	0.0021645	0.0532537
676462642	hypothetical protein LOTGIDRAFT_119841, partial [Lottia gigantea]	1.61556	0.004329	0.055342
676445936	hypothetical protein LOTGIDRAFT_206222 [Lottia gigantea]	1.61301	0.025974	0.0842521
676434102	hypothetical protein LOTGIDRAFT_149649 [Lottia gigantea]	1.6095	0.24026	0.233451
134281	SCRY3_ENTDO RecName: Full=S-crystallin 3; AltName: Full=OL3 [Enteroctopus dofleini]	1.60333	0.0649351	0.119258
143346991	Elav [Platynereis dumerilii]	1.60322	0.0021645	0.0532537
134281	SCRY3_ENTDO RecName: Full=S-crystallin 3; AltName: Full=OL3 [Enteroctopus dofleini]	1.59855	0.24026	0.233451
871228359	PREDICTED: protein FAM98A-like, partial [Aplysia californica]	1.59727	0.0151515	0.0726365
762123706	PREDICTED: neurofilament heavy polypeptide-like isoform X1 [Crassostrea gigas]	1.59723	0.0151515	0.0726365
Q7Z6J6	FRMD5_HUMAN FERM domain-containing protein 5 OS=Homo sapiens GN=FRMD5 PE=1 SV=1	1.59709	0.00865801	0.0668034
762095339	PREDICTED: PERQ amino acid-rich with GYF domain-containing protein 2-like [Crassostrea gigas]	1.59461	0.0411255	0.100424
296531410	eukaryotic translation initiation factor 6 [Saccoglossus kowalevskii]	1.58776	0.393939	0.311324
675892498	hypothetical protein HELRODRAFT_104422 [Helobdella robusta]	1.58751	0.0411255	0.100424
762078296	PREDICTED: membrane frizzled-related protein-like [Crassostrea gigas]	1.57789	0.0151515	0.0726365
699653071	PREDICTED: uncharacterized protein LOC104298476 [Picoides pubescens]	1.57725	0.0649351	0.119258
405970417	Titin [Crassostrea gigas]	1.57703	0.0151515	0.0726365
524905953	PREDICTED: nuclear pore complex protein Nup50-like isoform X2 [Aplysia californica]	1.57621	0.24026	0.233451
762165475	PREDICTED: enhancer of rudimentary homolog [Crassostrea gigas]	1.57146	0.132035	0.168628
762092223	PREDICTED: proteasome activator complex subunit 3-like [Crassostrea gigas]	1.57128	0.004329	0.055342
676439219	hypothetical protein LOTGIDRAFT_149783 [Lottia gigantea]	1.57112	0.0411255	0.100424
134281	SCRY3_ENTDO RecName: Full=S-crystallin 3; AltName: Full=OL3 [Enteroctopus dofleini]	1.5702	0.179654	0.197025
676484758	hypothetical protein LOTGIDRAFT_130231, partial [Lottia gigantea]	1.56261	0.0411255	0.100424
127189	MLR_TODPA RecName: Full=Myosin regulatory light chain LC-2, mantle muscle; Short=RLC [Todarodes pacificus]	1.55653	0.0151515	0.0726365
762167231	PREDICTED: aspartyl/asparaginyl beta-hydroxylase-like [Crassostrea gigas]	1.55559	0.0649351	0.119258
871235468	PREDICTED: probable global transcription activator SNF2L2 [Aplysia californica]	1.55277	0.025974	0.0842521
762126649	PREDICTED: protein DDI1 homolog 2-like [Crassostrea gigas]	1.55243	0.132035	0.168628
871236028	PREDICTED: troponin I-like [Aplysia californica]	1.55208	0.00865801	0.0668034
676432378	hypothetical protein LOTGIDRAFT_230500 [Lottia gigantea]	1.54962	0.0411255	0.100424
762076743	PREDICTED: upstream activation factor subunit spp27-like isoform X1 [Crassostrea gigas]	1.54885	0.0930736	0.144654
871262320	PREDICTED: uncharacterized protein LOC101855139 [Aplysia californica]	1.54451	0.0021645	0.0532537
762087415	PREDICTED: alpha-adducin-like isoform X9 [Crassostrea gigas]	1.54265	0.025974	0.0842521
387598187	ribosomal protein P1 [Ostrea edulis]	1.53442	0.00865801	0.0668034
344256640	hypothetical protein I79_023908 [Cricetulus griseus]	1.53429	0.0411255	0.100424
762136401	PREDICTED: WAS/WASL-interacting protein family member 1-like isoform X1 [Crassostrea gigas]	1.53363	0.0649351	0.119258
405951447	Virulence metalloprotease [Crassostrea gigas]	1.5312	0.484848	0.351238
405970416	Titin [Crassostrea gigas]	1.52938	0.025974	0.0842521
762142802	PREDICTED: enolase-phosphatase E1-like isoform X1 [Crassostrea gigas]	1.52555	0.0411255	0.100424
291242935	PREDICTED: epididymal secretory protein E1-like [Saccoglossus kowalevskii]	1.52518	0.0930736	0.144654
50080844	tropomysin-like protein [Todarodes pacificus]	1.52331	0.0649351	0.119258
676471653	hypothetical protein LOTGIDRAFT_233962 [Lottia gigantea]	1.52324	0.0649351	0.119258
354465052	PREDICTED: calmodulin-like protein 5 isoform X1 [Cricetulus griseus]	1.52208	0.004329	0.055342
558118597	PREDICTED: LOW QUALITY PROTEIN: neuroblast differentiation-associated protein AHNAK-like [Pelodiscus sinensis]	1.52161	0.0411255	0.100424
34784434	Eno1 protein [Mus musculus]	1.52022	1	0.554173
524910869	PREDICTED: calumenin-like isoform X2 [Aplysia californica]	1.51948	0.0649351	0.119258
325297000	cortactin [Aplysia californica]	1.51771	0.0649351	0.119258
762144378	PREDICTED: G kinase-anchoring protein 1-like [Crassostrea gigas]	1.51663	0.179654	0.197025
762085729	PREDICTED: serrate RNA effector molecule homolog isoform X2 [Crassostrea gigas]	1.51631	0.0151515	0.0726365
646704141	hypothetical protein L798_13723 [Zootermopsis nevadensis]	1.51286	0.025974	0.0842521
134281	SCRY3_ENTDO RecName: Full=S-crystallin 3; AltName: Full=OL3 [Enteroctopus dofleini]	1.51137	0.132035	0.168628
762124495	PREDICTED: LOW QUALITY PROTEIN: uncharacterized protein LOC105340758 [Crassostrea gigas]	1.51076	0.0649351	0.119258
675374685	Ubiquitin-conjugating enzyme E2 G1, partial [Stegodyphus mimosarum]	1.50906	0.0649351	0.119258
762123821	PREDICTED: caprin-1-like isoform X2 [Crassostrea gigas]	1.50689	0.0151515	0.0726365
762132698	PREDICTED: cysteine-rich venom protein pseudechetoxin-like isoform X2 [Crassostrea gigas]	1.50585	0.393939	0.311324
762116962	PREDICTED: ADP-ribosylation factor GTPase-activating protein 2-like isoform X1 [Crassostrea gigas]	1.50517	0.0411255	0.100424
871209276	PREDICTED: junctophilin-1-like [Aplysia californica]	1.50507	0.00865801	0.0668034
557147545	hypothetical protein, conserved [Eimeria tenella]	1.50246	0.179654	0.197025
762106583	PREDICTED: alpha-taxilin-like isoform X3 [Crassostrea gigas]	1.50175	0.0930736	0.144654
405963725	Sarcoplasmic reticulum histidine-rich calcium-binding protein [Crassostrea gigas]	1.50171	0.0151515	0.0726365
762152382	PREDICTED: RILP-like protein 1 isoform X3 [Crassostrea gigas]	1.4993	0.0649351	0.119258
676463960	hypothetical protein LOTGIDRAFT_190618 [Lottia gigantea]	1.49831	0.00865801	0.0668034
762131867	PREDICTED: protein PRRC2C-like [Crassostrea gigas]	1.49714	0.0649351	0.119258
762151258	PREDICTED: U1 small nuclear ribonucleoprotein 70 kDa-like isoform X2 [Crassostrea gigas]	1.49585	0.393939	0.311324
524867425	PREDICTED: uncharacterized protein LOC101860221 isoform X2 [Aplysia californica]	1.4955	0.0649351	0.119258
762095268	PREDICTED: protein CDV3 homolog isoform X2 [Crassostrea gigas]	1.49501	0.0649351	0.119258
134281	SCRY3_ENTDO RecName: Full=S-crystallin 3; AltName: Full=OL3 [Enteroctopus dofleini]	1.49491	0.179654	0.197025
762072706	PREDICTED: cleavage stimulation factor subunit 2 tau variant-like isoform X3 [Crassostrea gigas]	1.49247	0.0411255	0.100424
443684394	hypothetical protein CAPTEDRAFT_148023 [Capitella teleta]	1.48716	0.24026	0.233451
724965112	PREDICTED: cytochrome c oxidase copper chaperone [Rhinopithecus roxellana]	1.4865	0.0649351	0.119258
33772687	ferritin [Haemaphysalis longicornis]	1.48309	0.0649351	0.119258
637340564	PREDICTED: LOW QUALITY PROTEIN: titin [Anolis carolinensis]	1.48149	0.132035	0.168628
524910869	PREDICTED: calumenin-like isoform X2 [Aplysia californica]	1.48055	0.0649351	0.119258
676451433	hypothetical protein LOTGIDRAFT_239286 [Lottia gigantea]	1.47895	0.0151515	0.0726365
212168971	S1 type peptidase [Octopus kaurna]	1.47729	0.0151515	0.0726365
675369816	Ran-specific GTPase-activating protein, partial [Stegodyphus mimosarum]	1.47478	0.025974	0.0842521
584067550	PREDICTED: perilipin-4 [Myotis davidii]	1.47345	0.025974	0.0842521
354465052	PREDICTED: calmodulin-like protein 5 isoform X1 [Cricetulus griseus]	1.47059	0.588745	0.397775
795031304	PREDICTED: probable histone-binding protein Caf1 isoform X5 [Vollenhovia emeryi]	1.46985	0.588745	0.397775
762134296	PREDICTED: CD2 antigen cytoplasmic tail-binding protein 2 homolog isoform X1 [Crassostrea gigas]	1.46912	0.132035	0.168628
478492251	PREDICTED: tubulin-specific chaperone A [Ceratotherium simum simum]	1.46706	0.132035	0.168628
451173798	astacin-like metalloprotease [Sepiella maindroni]	1.46552	0.393939	0.311324
762083866	PREDICTED: serine/threonine-protein phosphatase alpha-2 isoform [Crassostrea gigas]	1.46249	0.484848	0.351238
762102249	PREDICTED: CAP-Gly domain-containing linker protein 1-like isoform X15 [Crassostrea gigas]	1.46242	0.0930736	0.144654
676464391	hypothetical protein LOTGIDRAFT_233117 [Lottia gigantea]	1.46096	0.0151515	0.0726365
524913271	PREDICTED: cysteine--tRNA ligase, cytoplasmic-like [Aplysia californica]	1.4607	0.484848	0.351238
676422020	hypothetical protein LOTGIDRAFT_202995 [Lottia gigantea]	1.45742	0.00865801	0.0668034
Q08BG7	SCOCA_DANRE Short coiled-coil protein A OS=Danio rerio GN=scoca PE=3 SV=1	1.45727	0.132035	0.168628
260805885	hypothetical protein BRAFLDRAFT_130183 [Branchiostoma floridae]	1.45657	0.0411255	0.100424
676486625	hypothetical protein LOTGIDRAFT_207166 [Lottia gigantea]	1.4565	0.025974	0.0842521
871236365	PREDICTED: protein bunched, class 2/F/G isoform-like, partial [Aplysia californica]	1.45424	0.179654	0.197025
405970177	Eukaryotic translation initiation factor 4B [Crassostrea gigas]	1.4542	0.0151515	0.0726365
871270603	PREDICTED: chromodomain-helicase-DNA-binding protein 4-like isoform X4 [Aplysia californica]	1.45384	0.00865801	0.0668034
871217893	PREDICTED: liprin-alpha-1-like [Aplysia californica]	1.4528	0.0649351	0.119258
762167825	PREDICTED: RNA-binding protein 24-A-like isoform X1 [Crassostrea gigas]	1.45185	0.0649351	0.119258
676483563	hypothetical protein LOTGIDRAFT_220800 [Lottia gigantea]	1.45104	0.0411255	0.100424
347965770	AGAP001372-PC [Anopheles gambiae str. PEST]	1.44905	0.393939	0.311324
308922621	Y-box binding protein [Sepiella maindroni]	1.44886	0.0151515	0.0726365
405951359	Leucine-rich repeat flightless-interacting protein 2 [Crassostrea gigas]	1.44788	0.025974	0.0842521
676461402	hypothetical protein LOTGIDRAFT_232681 [Lottia gigantea]	1.44787	0.0930736	0.144654
405952567	hypothetical protein CGI_10006238 [Crassostrea gigas]	1.44757	0.393939	0.311324
90101566	H2A_SEPOF RecName: Full=Histone H2A [Sepia officinalis]	1.44754	0.0411255	0.100424
808859777	Tubulin alpha-1C chain [Larimichthys crocea]	1.44591	0.025974	0.0842521
543368951	PREDICTED: hsc70-interacting protein isoform X2 [Pseudopodoces humilis]	1.44204	0.0151515	0.0726365
762131132	PREDICTED: zygotic DNA replication licensing factor mcm3-like [Crassostrea gigas]	1.4416	0.0930736	0.144654
524870471	PREDICTED: nuclear pore complex protein Nup153-like isoform X1 [Aplysia californica]	1.4412	0.0411255	0.100424
676443436	hypothetical protein LOTGIDRAFT_205260 [Lottia gigantea]	1.44091	0.24026	0.233451
871259634	PREDICTED: microtubule-associated protein tau-like [Aplysia californica]	1.44084	0.0151515	0.0726365
156542977	PREDICTED: splicing factor 3B subunit 1-like isoform X1 [Nasonia vitripennis]	1.44021	0.0151515	0.0726365
762107588	PREDICTED: BAG family molecular chaperone regulator 3-like [Crassostrea gigas]	1.43975	0.132035	0.168628
676460331	hypothetical protein LOTGIDRAFT_228660 [Lottia gigantea]	1.43909	0.588745	0.397775
762115139	PREDICTED: double-strand-break repair protein rad21 homolog [Crassostrea gigas]	1.43896	0.24026	0.233451
405969088	ATP-dependent RNA helicase DDX42 [Crassostrea gigas]	1.43747	0.025974	0.0842521
556757989	PREDICTED: uncharacterized protein LOC102336132 [Pantholops hodgsonii]	1.4373	0.393939	0.311324
597746215	PREDICTED: myotrophin [Astyanax mexicanus]	1.43664	0.0930736	0.144654
405978156	Plasma membrane calcium-transporting ATPase 3 [Crassostrea gigas]	1.43604	0.0930736	0.144654
762101092	PREDICTED: uncharacterized protein LOC105332204 isoform X1 [Crassostrea gigas]	1.43437	0.0649351	0.119258
402122771	CuZn superoxide dismutase [Mytilus galloprovincialis]	1.43157	0.025974	0.0842521
342160860	ataxin 2 [Octopus tankahkeei]	1.4308	0.132035	0.168628
762133337	PREDICTED: tripartite motif-containing protein 45-like isoform X6 [Crassostrea gigas]	1.43047	0.24026	0.233451
762108032	PREDICTED: coiled-coil domain-containing protein 6-like [Crassostrea gigas]	1.43019	0.0649351	0.119258
443705649	hypothetical protein CAPTEDRAFT_203586 [Capitella teleta]	1.4294	0.0649351	0.119258
676476648	hypothetical protein LOTGIDRAFT_125960 [Lottia gigantea]	1.42879	0.699134	0.445142
P20397	NUCL_XENLA Nucleolin OS=Xenopus laevis GN=ncl PE=2 SV=3	1.42816	0.025974	0.0842521
762170615	PREDICTED: programmed cell death protein 5-like [Crassostrea gigas]	1.42793	0.0411255	0.100424
390345173	PREDICTED: poly(U)-binding-splicing factor PUF60 isoform X2 [Strongylocentrotus purpuratus]	1.4279	0.0411255	0.100424
676484163	hypothetical protein LOTGIDRAFT_235604 [Lottia gigantea]	1.42769	0.132035	0.168628
O73775	FBLN1_CHICK Fibulin-1 OS=Gallus gallus GN=FBLN1 PE=2 SV=2	1.42757	0.393939	0.311324
762085655	PREDICTED: protein couch potato-like isoform X15 [Crassostrea gigas]	1.42185	0.0411255	0.100424
17538378	C01F6.9, isoform a [Caenorhabditis elegans]	1.42182	0.0930736	0.144654
676489036	hypothetical protein LOTGIDRAFT_176120, partial [Lottia gigantea]	1.4213	0.24026	0.233451
399207821	nucleoporin 62, partial [Sepiella maindroni]	1.4208	0.132035	0.168628
762104376	PREDICTED: chromobox protein homolog 1-like isoform X3 [Crassostrea gigas]	1.41834	0.025974	0.0842521
676484360	hypothetical protein LOTGIDRAFT_235650 [Lottia gigantea]	1.41794	0.0930736	0.144654
676441808	hypothetical protein LOTGIDRAFT_141698 [Lottia gigantea]	1.41728	0.004329	0.055342
405976660	Ran GTPase-activating protein 1 [Crassostrea gigas]	1.41666	0.00865801	0.0668034
443733543	hypothetical protein CAPTEDRAFT_218966 [Capitella teleta]	1.41586	0.132035	0.168628
620957921	PREDICTED: uncharacterized protein LOC100093342 [Ornithorhynchus anatinus]	1.41559	0.0649351	0.119258
871209492	PREDICTED: uncharacterized protein LOC106012782 [Aplysia californica]	1.41552	0.025974	0.0842521
762160716	PREDICTED: U6 snRNA-associated Sm-like protein LSm5 [Crassostrea gigas]	1.41535	0.0930736	0.144654
762125660	PREDICTED: probable signal peptidase complex subunit 2 isoform X2 [Crassostrea gigas]	1.4152	0.0649351	0.119258
676436358	hypothetical protein LOTGIDRAFT_111836 [Lottia gigantea]	1.41237	0.393939	0.311324
749793973	PREDICTED: cytochrome b-c1 complex subunit 6, mitochondrial [Harpegnathos saltator]	1.4123	0.309524	0.270516
524875601	PREDICTED: lamin-B1-like [Aplysia californica]	1.41167	0.179654	0.197025
546686709	hypothetical protein D910_00356 [Dendroctonus ponderosae]	1.41078	0.132035	0.168628
254587296	Gag-Pol polyprotein [Schistosoma japonicum]	1.41042	0.0411255	0.100424
676451073	hypothetical protein LOTGIDRAFT_239238 [Lottia gigantea]	1.40841	0.0411255	0.100424
719761625	PREDICTED: splicing factor 3A subunit 1 [Tinamus guttatus]	1.40834	0.0649351	0.119258
762099059	PREDICTED: serine/arginine repetitive matrix protein 1-like isoform X2 [Crassostrea gigas]	1.40624	0.025974	0.0842521
405963180	Protein SET [Crassostrea gigas]	1.40447	0.025974	0.0842521
154814650	lospin 7 [Amblyomma americanum]	1.40443	0.309524	0.270516
762138383	PREDICTED: eukaryotic translation initiation factor 4 gamma 1-like isoform X2 [Crassostrea gigas]	1.40416	0.132035	0.168628
405973281	Drebrin-like protein [Crassostrea gigas]	1.40135	0.0930736	0.144654
871270401	PREDICTED: WASH complex subunit FAM21C-like isoform X2 [Aplysia californica]	1.39989	0.24026	0.233451
524911945	PREDICTED: uncharacterized protein LOC101852657 [Aplysia californica]	1.39948	0.0649351	0.119258
762118090	PREDICTED: cohesin subunit SA-1-like isoform X3 [Crassostrea gigas]	1.39772	0.24026	0.233451
762113596	PREDICTED: glutenin, high molecular weight subunit PW212-like [Crassostrea gigas]	1.39759	0.0930736	0.144654
762113892	PREDICTED: splicing factor 3A subunit 3-like [Crassostrea gigas]	1.39687	0.0649351	0.119258
762093795	PREDICTED: uncharacterized protein LOC105329712 isoform X1 [Crassostrea gigas]	1.39616	0.179654	0.197025
676473137	hypothetical protein LOTGIDRAFT_179011 [Lottia gigantea]	1.39392	0.588745	0.397775
Q7M3Y3	TNNI_CHLNI Troponin I OS=Chlamys nipponensis akazara PE=1 SV=2	1.39245	0.0649351	0.119258
762101196	PREDICTED: eukaryotic translation initiation factor 3 subunit J-A-like [Crassostrea gigas]	1.38941	0.179654	0.197025
405958653	hypothetical protein CGI_10006272 [Crassostrea gigas]	1.38838	0.0930736	0.144654
405960381	Monocarboxylate transporter 12 [Crassostrea gigas]	1.38707	0.179654	0.197025
817074482	PREDICTED: protein LSM14 homolog B-B-like isoform X1 [Athalia rosae]	1.3849	0.179654	0.197025
198432681	PREDICTED: histone H2A.V [Ciona intestinalis]	1.38417	0.0649351	0.119258
762131701	PREDICTED: probable WRKY transcription factor protein 1 isoform X2 [Crassostrea gigas]	1.38354	0.588745	0.397775
762107602	PREDICTED: protein canopy homolog 2-like [Crassostrea gigas]	1.38325	0.179654	0.197025
871268141	PREDICTED: epidermal growth factor receptor substrate 15-like 1 isoform X2 [Aplysia californica]	1.38199	0.025974	0.0842521
817087887	PREDICTED: NADH dehydrogenase [ubiquinone] 1 alpha subcomplex subunit 1 [Athalia rosae]	1.37994	0.309524	0.270516
676474381	hypothetical protein LOTGIDRAFT_106733 [Lottia gigantea]	1.37921	0.484848	0.351238
676485093	hypothetical protein LOTGIDRAFT_204607 [Lottia gigantea]	1.37849	0.24026	0.233451
19879404	non-muscle myosin II heavy chain [Doryteuthis pealeii]	1.37769	0.588745	0.397775
762144065	PREDICTED: LOW QUALITY PROTEIN: uncharacterized protein LOC105347787 [Crassostrea gigas]	1.37723	0.004329	0.055342
676482327	hypothetical protein LOTGIDRAFT_128630 [Lottia gigantea]	1.37537	0.0930736	0.144654
752870842	PREDICTED: chitobiosyldiphosphodolichol beta-mannosyltransferase [Camponotus floridanus]	1.37291	0.588745	0.397775
762110864	PREDICTED: altered inheritance of mitochondria protein 3-like isoform X3 [Crassostrea gigas]	1.37234	0.0411255	0.100424
762168468	PREDICTED: SUZ domain-containing protein 1-like [Crassostrea gigas]	1.37196	0.179654	0.197025
871266405	PREDICTED: rac guanine nucleotide exchange factor B-like [Aplysia californica]	1.37188	0.132035	0.168628
762152944	PREDICTED: E3 ubiquitin-protein ligase HUWE1-like isoform X3 [Crassostrea gigas]	1.37143	0.309524	0.270516
762132145	PREDICTED: rho guanine nucleotide exchange factor 7-like isoform X6 [Crassostrea gigas]	1.37037	0.179654	0.197025
391347875	PREDICTED: histone H1.0-A-like [Metaseiulus occidentalis]	1.36984	0.132035	0.168628
25453302	TNNC_TODPA RecName: Full=Troponin C; Short=TN-C [Todarodes pacificus]	1.36975	0.0151515	0.0726365
762078497	PREDICTED: muscle M-line assembly protein unc-89-like isoform X5 [Crassostrea gigas]	1.36774	0.025974	0.0842521
296434195	uncharacterized protein LOC100376325 [Saccoglossus kowalevskii]	1.36745	0.179654	0.197025
645004167	PREDICTED: probable protein phosphatase CG10417 [Nasonia vitripennis]	1.36722	0.0151515	0.0726365
871263000	PREDICTED: troponin T-like [Aplysia californica]	1.36619	0.025974	0.0842521
241675487	microtubule-associated protein tau, putative [Ixodes scapularis]	1.36466	0.179654	0.197025
405963231	hypothetical protein CGI_10019048 [Crassostrea gigas]	1.36372	0.24026	0.233451
115910522	PREDICTED: cytochrome c oxidase subunit 6B1 [Strongylocentrotus purpuratus]	1.36185	0.025974	0.0842521
762137521	PREDICTED: nucleobindin-2-like isoform X3 [Crassostrea gigas]	1.35979	0.309524	0.270516
762107356	PREDICTED: zinc metalloproteinase nas-13-like [Crassostrea gigas]	1.35857	0.0411255	0.100424
762102328	PREDICTED: xaa-Pro aminopeptidase 1-like [Crassostrea gigas]	1.35838	0.818182	0.489396
161110488	TFG beta signaling pathway factor [Pinctada fucata]	1.35791	0.0021645	0.0532537
159741	omega-crystallin [Enteroctopus dofleini]	1.35635	0.393939	0.311324
762150583	PREDICTED: tyrosine-protein kinase PR2-like isoform X6 [Crassostrea gigas]	1.35616	0.0411255	0.100424
Q6DID3	SCAF8_MOUSE Protein SCAF8 OS=Mus musculus GN=Scaf8 PE=1 SV=1	1.35516	0.0151515	0.0726365
524865797	PREDICTED: endophilin-A3-like isoform X3 [Aplysia californica]	1.35331	0.0649351	0.119258
405953105	Ankyrin-1 [Crassostrea gigas]	1.35079	0.24026	0.233451
657799149	PREDICTED: M-phase phosphoprotein 8 isoform X1 [Cynoglossus semilaevis]	1.34931	0.0649351	0.119258
20336352	SNAP25 fusion protein [Doryteuthis pealeii]	1.34862	0.0411255	0.100424
676460331	hypothetical protein LOTGIDRAFT_228660 [Lottia gigantea]	1.34851	0.24026	0.233451
676474526	hypothetical protein LOTGIDRAFT_229048 [Lottia gigantea]	1.3481	0.309524	0.270516
443691518	hypothetical protein CAPTEDRAFT_181658 [Capitella teleta]	1.34757	0.0151515	0.0726365
676445425	hypothetical protein LOTGIDRAFT_239016 [Lottia gigantea]	1.347	0.0649351	0.119258
290794772	tropomyosin [Heterololigo bleekeri]	1.34632	0.179654	0.197025
676439146	hypothetical protein LOTGIDRAFT_112382 [Lottia gigantea]	1.34337	0.309524	0.270516
871272625	PREDICTED: adenylate kinase 8-like [Aplysia californica]	1.34323	0.00865801	0.0668034
405977975	Synapse-associated protein 1 [Crassostrea gigas]	1.34306	0.0411255	0.100424
676493545	hypothetical protein LOTGIDRAFT_236865 [Lottia gigantea]	1.34225	0.24026	0.233451
871274397	PREDICTED: titin-like [Aplysia californica]	1.34189	0.484848	0.351238
642102817	unnamed protein product [Oncorhynchus mykiss]	1.3418	0.393939	0.311324
762141691	PREDICTED: heterogeneous nuclear ribonucleoprotein K-like isoform X1 [Crassostrea gigas]	1.34026	0.00865801	0.0668034
676477978	hypothetical protein LOTGIDRAFT_234764 [Lottia gigantea]	1.33841	0.309524	0.270516
762148527	PREDICTED: protein polybromo-1-like isoform X12 [Crassostrea gigas]	1.33602	0.0151515	0.0726365
762090166	PREDICTED: small glutamine-rich tetratricopeptide repeat-containing protein beta-like [Crassostrea gigas]	1.33237	0.0411255	0.100424
871248220	PREDICTED: calmodulin-like protein 3 [Aplysia californica]	1.33075	0.0649351	0.119258
443684394	hypothetical protein CAPTEDRAFT_148023 [Capitella teleta]	1.33029	0.179654	0.197025
Q8WZ42	TITIN_HUMAN Titin OS=Homo sapiens GN=TTN PE=1 SV=4	1.32982	0.24026	0.233451
762084277	PREDICTED: signal transducing adapter molecule 2-like isoform X3 [Crassostrea gigas]	1.32949	0.0930736	0.144654
871204743	PREDICTED: trichohyalin-like [Aplysia californica]	1.32879	0.0411255	0.100424
198437413	PREDICTED: 5'-AMP-activated protein kinase subunit beta-1 [Ciona intestinalis]	1.32869	0.179654	0.197025
762074425	PREDICTED: signal recognition particle subunit SRP72-like [Crassostrea gigas]	1.32858	0.025974	0.0842521
762129387	PREDICTED: mesencephalic astrocyte-derived neurotrophic factor homolog [Crassostrea gigas]	1.32822	0.393939	0.311324
478255399	hypothetical protein YQE_07799, partial [Dendroctonus ponderosae]	1.32817	0.025974	0.0842521
762119241	PREDICTED: heterogeneous nuclear ribonucleoprotein L-like isoform X1 [Crassostrea gigas]	1.32786	0.309524	0.270516
676445633	hypothetical protein LOTGIDRAFT_174239 [Lottia gigantea]	1.32773	0.484848	0.351238
762107576	PREDICTED: myelin expression factor 2-like isoform X1 [Crassostrea gigas]	1.32478	0.00865801	0.0668034
645031715	PREDICTED: tropomyosin 1 isoform X12 [Nasonia vitripennis]	1.32413	0.132035	0.168628
871222330	PREDICTED: nucleoprotein TPR-like isoform X2 [Aplysia californica]	1.32259	0.0151515	0.0726365
Q8IIG7	YPF05_PLAF7 Uncharacterized protein PF11_0207 OS=Plasmodium falciparum (isolate 3D7) GN=PF11_0207 PE=1 SV=2	1.32183	0.179654	0.197025
524914367	PREDICTED: filaggrin-like [Aplysia californica]	1.32105	0.179654	0.197025
755975209	PREDICTED: papilin-like [Fopius arisanus]	1.32083	0.309524	0.270516
657553256	PREDICTED: eukaryotic translation initiation factor 5A-1 [Stegastes partitus]	1.32017	0.132035	0.168628
676458833	hypothetical protein LOTGIDRAFT_215757 [Lottia gigantea]	1.32006	0.132035	0.168628
762084507	PREDICTED: LIM and SH3 domain protein Lasp-like isoform X7 [Crassostrea gigas]	1.3199	0.0649351	0.119258
524878917	PREDICTED: uncharacterized protein LOC101849999 [Aplysia californica]	1.31886	0.484848	0.351238
762132192	PREDICTED: DNA topoisomerase 2-alpha-like [Crassostrea gigas]	1.31859	0.0411255	0.100424
555956361	PREDICTED: c-Jun-amino-terminal kinase-interacting protein 4 isoform X1 [Bos mutus]	1.31785	0.025974	0.0842521
823327709	chitin binding beak protein 2 [Dosidicus gigas]	1.31686	0.309524	0.270516
405974177	Tubulin polymerization-promoting protein family member 2 [Crassostrea gigas]	1.31664	0.025974	0.0842521
37700237	translationally-controlled tumor protein homolog [Danio rerio]	1.31661	0.24026	0.233451
675870050	hypothetical protein HELRODRAFT_157245 [Helobdella robusta]	1.31466	0.0649351	0.119258
524901267	PREDICTED: transcription elongation factor S-II-like [Aplysia californica]	1.31324	0.0151515	0.0726365
762110088	PREDICTED: PDZ and LIM domain protein 7-like isoform X1 [Crassostrea gigas]	1.31306	0.0649351	0.119258
443731158	hypothetical protein CAPTEDRAFT_182031 [Capitella teleta]	1.3126	0.24026	0.233451
676451297	hypothetical protein LOTGIDRAFT_174762 [Lottia gigantea]	1.31207	0.0649351	0.119258
212169133	NP2 [Octopus kaurna]	1.30958	0.0649351	0.119258
762110086	PREDICTED: PDZ and LIM domain protein 3-like isoform X2 [Crassostrea gigas]	1.30955	0.025974	0.0842521
657757959	PREDICTED: protein FAM83B-like isoform X2 [Cynoglossus semilaevis]	1.30835	0.179654	0.197025
524913816	PREDICTED: heterogeneous nuclear ribonucleoprotein A1-like isoform X1 [Aplysia californica]	1.30803	0.0411255	0.100424
348514674	PREDICTED: glutathione S-transferase Mu 3-like [Oreochromis niloticus]	1.30796	0.0649351	0.119258
524882642	PREDICTED: ralBP1-associated Eps domain-containing protein 1-like isoform X1 [Aplysia californica]	1.30451	0.132035	0.168628
577029959	proteasomal ubiquitin receptor adrm1, partial [Biomphalaria glabrata]	1.30438	0.0930736	0.144654
676473175	hypothetical protein LOTGIDRAFT_234262 [Lottia gigantea]	1.30416	0.179654	0.197025
443695383	hypothetical protein CAPTEDRAFT_153835 [Capitella teleta]	1.30381	0.0930736	0.144654
573881219	PREDICTED: acidic leucine-rich nuclear phosphoprotein 32 family member A-like isoform X2 [Lepisosteus oculatus]	1.303	0.0411255	0.100424
752864514	PREDICTED: ATP synthase subunit e, mitochondrial [Camponotus floridanus]	1.30258	0.24026	0.233451
871243339	PREDICTED: latrophilin-1-like [Aplysia californica]	1.30193	0.0411255	0.100424
405966815	hypothetical protein CGI_10014470 [Crassostrea gigas]	1.30189	0.588745	0.397775
405974726	U1 small nuclear ribonucleoprotein A [Crassostrea gigas]	1.30081	0.0930736	0.144654
762085731	PREDICTED: serrate RNA effector molecule homolog isoform X3 [Crassostrea gigas]	1.29884	0.025974	0.0842521
291225390	PREDICTED: dynactin subunit 2-like isoform X1 [Saccoglossus kowalevskii]	1.29879	0.0930736	0.144654
Q54NE6	PGAM_DICDI Probable phosphoglycerate mutase OS=Dictyostelium discoideum GN=gpmA PE=1 SV=1	1.29872	0.00865801	0.0668034
762135519	PREDICTED: histone-binding protein N1/N2-like isoform X1 [Crassostrea gigas]	1.29702	0.699134	0.445142
805792532	PREDICTED: LOW QUALITY PROTEIN: titin-like [Megachile rotundata]	1.29619	0.0411255	0.100424
657543162	PREDICTED: microtubule-associated protein RP/EB family member 3 isoform X1 [Stegastes partitus]	1.29458	0.0649351	0.119258
Q91XD4	FTCD_MOUSE Formimidoyltransferase-cyclodeaminase OS=Mus musculus GN=Ftcd PE=1 SV=1	1.2923	0.309524	0.270516
470440973	IgA-specific serine endopeptidase [Acanthamoeba castellanii str. Neff]	1.29178	0.0649351	0.119258
762135523	PREDICTED: histone-binding protein N1/N2-like [Crassostrea gigas]	1.29124	0.0411255	0.100424
676495224	hypothetical protein LOTGIDRAFT_134504 [Lottia gigantea]	1.28917	0.937229	0.531818
676467024	hypothetical protein LOTGIDRAFT_233455 [Lottia gigantea]	1.28645	0.0930736	0.144654
260818256	hypothetical protein BRAFLDRAFT_115113 [Branchiostoma floridae]	1.28582	0.179654	0.197025
762114431	PREDICTED: peroxidasin-like isoform X1 [Crassostrea gigas]	1.285	0.132035	0.168628
859779831	PREDICTED: glucosidase 2 subunit beta isoform X3 [Mustela putorius furo]	1.28474	0.24026	0.233451
524892173	PREDICTED: heterogeneous nuclear ribonucleoprotein A1-like [Aplysia californica]	1.28342	0.179654	0.197025
762164587	PREDICTED: SWI/SNF complex subunit SMARCC2-like isoform X6 [Crassostrea gigas]	1.28233	0.00865801	0.0668034
762116485	PREDICTED: presenilin-1-like [Crassostrea gigas]	1.28201	0.179654	0.197025
574990296	hypothetical protein PFMALIP_00476 [Plasmodium falciparum MaliPS096_E11]	1.28184	0.0930736	0.144654
762085926	PREDICTED: mucin-17-like [Crassostrea gigas]	1.28132	0.309524	0.270516
762151104	PREDICTED: uncharacterized abhydrolase domain-containing protein DDB_G0269086-like isoform X4 [Crassostrea gigas]	1.28125	0.132035	0.168628
405973648	Pericentriolar material 1 protein [Crassostrea gigas]	1.28038	0.309524	0.270516
156400995	predicted protein [Nematostella vectensis]	1.2799	0.0930736	0.144654
762150708	PREDICTED: succinate dehydrogenase assembly factor 4, mitochondrial-like [Crassostrea gigas]	1.27767	0.179654	0.197025
762163028	PREDICTED: transcription elongation regulator 1-like isoform X1 [Crassostrea gigas]	1.27733	0.24026	0.233451
780104901	PREDICTED: traB domain-containing protein [Strongylocentrotus purpuratus]	1.27722	0.179654	0.197025
762106689	PREDICTED: uncharacterized abhydrolase domain-containing protein DDB_G0269086-like isoform X4 [Crassostrea gigas]	1.27679	0.24026	0.233451
260803876	hypothetical protein BRAFLDRAFT_130590 [Branchiostoma floridae]	1.2747	0.309524	0.270516
762122993	PREDICTED: spectrin alpha chain-like isoform X8 [Crassostrea gigas]	1.27457	0.025974	0.0842521
676444223	hypothetical protein LOTGIDRAFT_158663 [Lottia gigantea]	1.27382	0.484848	0.351238
405954873	hypothetical protein CGI_10002658 [Crassostrea gigas]	1.27337	0.24026	0.233451
556972470	PREDICTED: myosin regulatory light polypeptide 9 isoform X1 [Latimeria chalumnae]	1.27175	0.309524	0.270516
Q4A0V8	UAFA_STAS1 Uro-adherence factor A OS=Staphylococcus saprophyticus subsp. saprophyticus (strain ATCC 15305 / DSM 20229) GN=uafA PE=1 SV=1	1.26995	0.24026	0.233451
358253754	cell division cycle protein 37 [Clonorchis sinensis]	1.26968	0.179654	0.197025
260789520	hypothetical protein BRAFLDRAFT_60179 [Branchiostoma floridae]	1.26948	0.24026	0.233451
573890431	PREDICTED: mitochondrial import inner membrane translocase subunit Tim8 A-like [Lepisosteus oculatus]	1.26938	0.309524	0.270516
676435774	hypothetical protein LOTGIDRAFT_139359 [Lottia gigantea]	1.26873	0.0151515	0.0726365
762141356	PREDICTED: small nuclear ribonucleoprotein G-like [Crassostrea gigas]	1.26863	0.0649351	0.119258
871268837	PREDICTED: cyclin-G-associated kinase-like [Aplysia californica]	1.26843	0.0649351	0.119258
524906144	PREDICTED: uncharacterized protein LOC101857145 isoform X2 [Aplysia californica]	1.26754	0.0649351	0.119258
405952168	La-related protein 4 [Crassostrea gigas]	1.26714	0.179654	0.197025
307170257	SUMO-conjugating enzyme UBC9 [Camponotus floridanus]	1.2668	0.0930736	0.144654
762078017	PREDICTED: exportin-1-like [Crassostrea gigas]	1.26667	0.0649351	0.119258
524888474	PREDICTED: heterogeneous nuclear ribonucleoprotein D-like-B isoform X1 [Aplysia californica]	1.26654	0.00865801	0.0668034
762107887	PREDICTED: nuclear pore complex protein Nup93-like [Crassostrea gigas]	1.26625	0.025974	0.0842521
762104107	PREDICTED: stress-induced-phosphoprotein 1-like [Crassostrea gigas]	1.26591	0.0649351	0.119258
405962245	Neuronal membrane glycoprotein M6-b [Crassostrea gigas]	1.26549	0.00865801	0.0668034
524907404	PREDICTED: serine/threonine-protein kinase 3-like isoform X2 [Aplysia californica]	1.26413	0.132035	0.168628
676428763	hypothetical protein LOTGIDRAFT_94316, partial [Lottia gigantea]	1.2641	0.0411255	0.100424
568252012	OCIA domain-containing protein 1 [Anopheles darlingi]	1.26388	0.132035	0.168628
762143522	PREDICTED: neo-calmodulin-like isoform X1 [Crassostrea gigas]	1.26277	0.179654	0.197025
161292	neurofilament protein [Doryteuthis pealeii]	1.26099	0.132035	0.168628
668458378	hypothetical protein ZHAS_00014279 [Anopheles sinensis]	1.26084	0.24026	0.233451
762133645	PREDICTED: nascent polypeptide-associated complex subunit alpha-like [Crassostrea gigas]	1.2602	0.025974	0.0842521
675885622	hypothetical protein HELRODRAFT_180780 [Helobdella robusta]	1.26007	0.393939	0.311324
762131067	PREDICTED: programmed cell death protein 6-like isoform X2 [Crassostrea gigas]	1.25985	0.24026	0.233451
676485505	hypothetical protein LOTGIDRAFT_154924 [Lottia gigantea]	1.25971	0.393939	0.311324
676490918	hypothetical protein LOTGIDRAFT_168891 [Lottia gigantea]	1.25872	0.0649351	0.119258
301622459	PREDICTED: barrier-to-autointegration factor [Xenopus (Silurana) tropicalis]	1.25868	0.0649351	0.119258
530623668	PREDICTED: fatty-acid amide hydrolase 2 isoform X1 [Chrysemys picta bellii]	1.25863	0.818182	0.489396
P57759	ERP29_MOUSE Endoplasmic reticulum resident protein 29 OS=Mus musculus GN=Erp29 PE=1 SV=2	1.2584	0.393939	0.311324
126697332	calcineurin B [Haliotis discus discus]	1.25836	0.132035	0.168628
762103546	PREDICTED: poly(rC)-binding protein 3-like isoform X3 [Crassostrea gigas]	1.25827	0.0151515	0.0726365
871243636	PREDICTED: mucin-5AC-like [Aplysia californica]	1.25738	0.0411255	0.100424
524911475	PREDICTED: T-complex protein 1 subunit beta-like [Aplysia californica]	1.25678	0.0151515	0.0726365
762083280	PREDICTED: cysteine-rich with EGF-like domain protein 2-B isoform X1 [Crassostrea gigas]	1.25606	0.132035	0.168628
762115623	PREDICTED: FCH and double SH3 domains protein 2-like isoform X6 [Crassostrea gigas]	1.25572	0.0930736	0.144654
385145416	alpha tubulin 6 [Sepia officinalis]	1.25565	0.132035	0.168628
762161060	PREDICTED: zinc finger homeobox protein 4-like isoform X1 [Crassostrea gigas]	1.25418	0.0649351	0.119258
126697400	putative mitochondrial ATP synthase [Haliotis discus discus]	1.254	0.132035	0.168628
Q61474	MSI1H_MOUSE RNA-binding protein Musashi homolog 1 OS=Mus musculus GN=Msi1 PE=1 SV=1	1.25296	0.0930736	0.144654
762131939	PREDICTED: mitochondrial fission 1 protein-like isoform X1 [Crassostrea gigas]	1.25228	0.309524	0.270516
443716636	hypothetical protein CAPTEDRAFT_163399 [Capitella teleta]	1.25143	0.0930736	0.144654
260799776	hypothetical protein BRAFLDRAFT_124447 [Branchiostoma floridae]	1.25105	0.0930736	0.144654
443697718	hypothetical protein CAPTEDRAFT_154791 [Capitella teleta]	1.25102	0.699134	0.445142
483523815	Cathepsin Z, partial [Anas platyrhynchos]	1.2498	0.937229	0.531818
405960687	Host cell factor [Crassostrea gigas]	1.24963	0.393939	0.311324
159741	omega-crystallin [Enteroctopus dofleini]	1.24962	0.393939	0.311324
871267727	PREDICTED: PDZ and LIM domain protein 7-like isoform X1 [Aplysia californica]	1.24909	0.179654	0.197025
405975372	hypothetical protein CGI_10026945 [Crassostrea gigas]	1.24718	0.24026	0.233451
676455118	hypothetical protein LOTGIDRAFT_215051 [Lottia gigantea]	1.24704	0.393939	0.311324
524898322	PREDICTED: flap endonuclease 1-like [Aplysia californica]	1.24689	0.132035	0.168628
405970058	Eukaryotic translation initiation factor 3 subunit A [Crassostrea gigas]	1.24652	0.025974	0.0842521
524896689	PREDICTED: NADH dehydrogenase [ubiquinone] 1 alpha subcomplex subunit 8-like [Aplysia californica]	1.246	0.393939	0.311324
676492133	hypothetical protein LOTGIDRAFT_222631 [Lottia gigantea]	1.24565	0.179654	0.197025
524913816	PREDICTED: heterogeneous nuclear ribonucleoprotein A1-like isoform X1 [Aplysia californica]	1.24536	0.132035	0.168628
762145329	PREDICTED: ubiquitin-like domain-containing CTD phosphatase 1 [Crassostrea gigas]	1.2443	0.393939	0.311324
443684707	hypothetical protein CAPTEDRAFT_89350 [Capitella teleta]	1.24417	0.179654	0.197025
871214476	PREDICTED: uncharacterized protein LOC101851628 [Aplysia californica]	1.24381	0.699134	0.445142
241913776	ribosomal protein S12 [Pinctada maxima]	1.24357	0.0649351	0.119258
676448283	hypothetical protein LOTGIDRAFT_152943 [Lottia gigantea]	1.24335	0.0649351	0.119258
675388979	heat- and acid-stable phosphoprotein, partial [Stegodyphus mimosarum]	1.24246	0.309524	0.270516
576644009	sepiatocin precursor [Sepia officinalis]	1.24079	0.24026	0.233451
676480897	hypothetical protein LOTGIDRAFT_210667 [Lottia gigantea]	1.2401	0.179654	0.197025
405971182	MAP kinase-activating death domain protein [Crassostrea gigas]	1.23841	0.484848	0.351238
524871443	PREDICTED: forkhead box protein K2-like [Aplysia californica]	1.235	0.0649351	0.119258
83415124	uncharacterized protein LOC562839 [Danio rerio]	1.23482	0.179654	0.197025
871259492	PREDICTED: uncharacterized protein LOC101847901 [Aplysia californica]	1.23343	0.393939	0.311324
676496561	hypothetical protein LOTGIDRAFT_223566 [Lottia gigantea]	1.23301	0.393939	0.311324
817737473	hypothetical protein AK88_00621 [Plasmodium fragile]	1.23297	0.132035	0.168628
762142838	PREDICTED: protein phosphatase inhibitor 2-like [Crassostrea gigas]	1.23219	0.179654	0.197025
143346991	Elav [Platynereis dumerilii]	1.23158	0.24026	0.233451
241017244	stathmin [Octopus vulgaris]	1.23148	0.484848	0.351238
762119873	PREDICTED: transcriptional regulator ATRX-like isoform X1 [Crassostrea gigas]	1.23098	0.132035	0.168628
676472430	hypothetical protein LOTGIDRAFT_84087, partial [Lottia gigantea]	1.23095	0.24026	0.233451
115390	CABO_DORPE RecName: Full=Squidulin; AltName: Full=Optic lobe calcium-binding protein; AltName: Full=SCABP [Doryteuthis pealeii]	1.23093	0.24026	0.233451
443708545	hypothetical protein CAPTEDRAFT_186176 [Capitella teleta]	1.23008	0.818182	0.489396
74820990	CPLX_DORPE RecName: Full=Complexin; AltName: Full=Synaphin; Flags: Precursor [Doryteuthis pealeii]	1.22988	0.179654	0.197025
Q2HJ81	TBB6_BOVIN Tubulin beta-6 chain OS=Bos taurus GN=TUBB6 PE=2 SV=1	1.22671	0.0649351	0.119258
524884741	PREDICTED: polyadenylate-binding protein 2-B-like [Aplysia californica]	1.22624	0.0151515	0.0726365
871274397	PREDICTED: titin-like [Aplysia californica]	1.22583	0.699134	0.445142
126697378	mitochondrial ATP synthase delta chain [Haliotis discus discus]	1.22217	0.0930736	0.144654
762148975	PREDICTED: zinc finger CCHC domain-containing protein 8-like [Crassostrea gigas]	1.21878	0.588745	0.397775
405971473	Cytoplasmic dynein 1 light intermediate chain 1 [Crassostrea gigas]	1.21844	0.588745	0.397775
762114473	PREDICTED: deoxyhypusine hydroxylase-like [Crassostrea gigas]	1.21735	0.025974	0.0842521
676485505	hypothetical protein LOTGIDRAFT_154924 [Lottia gigantea]	1.21704	0.699134	0.445142
170592090	thioredoxin [Brugia malayi]	1.21657	0.0930736	0.144654
405950379	Protein phosphatase 1 regulatory subunit 12A [Crassostrea gigas]	1.21626	0.309524	0.270516
554862164	PREDICTED: collagen alpha-1(VII) chain-like [Haplochromis burtoni]	1.21553	0.0021645	0.0532537
676460331	hypothetical protein LOTGIDRAFT_228660 [Lottia gigantea]	1.21491	0.393939	0.311324
676457360	hypothetical protein LOTGIDRAFT_227355 [Lottia gigantea]	1.2147	0.132035	0.168628
524865797	PREDICTED: endophilin-A3-like isoform X3 [Aplysia californica]	1.21356	0.0151515	0.0726365
762106715	PREDICTED: B-cell receptor-associated protein 31-like [Crassostrea gigas]	1.21279	0.179654	0.197025
266616	NF60_DORPE RecName: Full=60 kDa neurofilament protein; Short=NF60 [Doryteuthis pealeii]	1.21214	0.132035	0.168628
762142480	PREDICTED: epsin-2-like isoform X3 [Crassostrea gigas]	1.21186	0.179654	0.197025
762170219	PREDICTED: heterochromatin protein 1-binding protein 3-like [Crassostrea gigas]	1.2115	0.004329	0.055342
676468861	hypothetical protein LOTGIDRAFT_191571 [Lottia gigantea]	1.2114	0.24026	0.233451
676449482	hypothetical protein LOTGIDRAFT_187854 [Lottia gigantea]	1.21093	0.025974	0.0842521
405966464	Guanine nucleotide-binding protein subunit gamma-1 [Crassostrea gigas]	1.20883	0.309524	0.270516
762142998	PREDICTED: protein scribble homolog isoform X7 [Crassostrea gigas]	1.20853	0.393939	0.311324
676427106	hypothetical protein LOTGIDRAFT_136131, partial [Lottia gigantea]	1.2076	0.393939	0.311324
762150610	PREDICTED: alkaline phosphatase, tissue-nonspecific isozyme-like [Crassostrea gigas]	1.20727	0.179654	0.197025
762122357	PREDICTED: protein bicaudal D-like isoform X1 [Crassostrea gigas]	1.20666	0.484848	0.351238
871247218	PREDICTED: TOM1-like protein 2 isoform X3 [Aplysia californica]	1.20647	0.309524	0.270516
676486625	hypothetical protein LOTGIDRAFT_207166 [Lottia gigantea]	1.20632	0.588745	0.397775
405950801	La-related protein 1 [Crassostrea gigas]	1.20606	0.132035	0.168628
157128477	AAEL011157-PA [Aedes aegypti]	1.20548	0.179654	0.197025
443695556	hypothetical protein CAPTEDRAFT_21125 [Capitella teleta]	1.20527	0.0649351	0.119258
576250929	mitogen-activated protein kinase p38 [Scylla paramamosain]	1.20493	0.818182	0.489396
405978430	Calcyphosin-like protein [Crassostrea gigas]	1.2049	0.393939	0.311324
325297110	fragile X mental retardation protein [Aplysia californica]	1.20321	0.0021645	0.0532537
377652574	SAM domain and HD domain-containing protein 1 [Nasalis larvatus]	1.203	0.484848	0.351238
780672647	PREDICTED: sortilin-related receptor-like isoform X1 [Wasmannia auropunctata]	1.20236	0.0411255	0.100424
762131826	PREDICTED: E3 ubiquitin-protein ligase arih1-like [Crassostrea gigas]	1.20131	0.179654	0.197025
676429153	hypothetical protein LOTGIDRAFT_203414 [Lottia gigantea]	1.2012	0.004329	0.055342
699585553	PREDICTED: calmodulin-A-like [Apaloderma vittatum]	1.20112	0.24026	0.233451
676482685	hypothetical protein LOTGIDRAFT_128909, partial [Lottia gigantea]	1.20021	0.132035	0.168628
577147996	polyubiquitin-B [Plasmodium vinckei petteri]	1.20005	0.484848	0.351238
Q29243	DAG1_PIG Dystroglycan OS=Sus scrofa GN=DAG1 PE=2 SV=2	1.19935	0.132035	0.168628
762072073	PREDICTED: general transcription factor IIF subunit 1-like [Crassostrea gigas]	1.19931	0.179654	0.197025
762105376	PREDICTED: protein quaking-B-like isoform X5 [Crassostrea gigas]	1.19879	0.0649351	0.119258
52346130	60S ribosomal protein L23a [Xenopus (Silurana) tropicalis]	1.19869	0.0649351	0.119258
157818179	elongation factor 1-beta [Rattus norvegicus]	1.19814	0.179654	0.197025
345306629	PREDICTED: RNA-binding motif protein, X chromosome [Ornithorhynchus anatinus]	1.19809	0.132035	0.168628
762092822	PREDICTED: ribosome-binding protein 1-like isoform X12 [Crassostrea gigas]	1.19717	0.309524	0.270516
762090170	PREDICTED: neuronal calcium sensor 2-like [Crassostrea gigas]	1.19656	0.309524	0.270516
762122991	PREDICTED: spectrin alpha chain-like isoform X7 [Crassostrea gigas]	1.19612	0.025974	0.0842521
762111966	PREDICTED: neurabin-1-like isoform X1 [Crassostrea gigas]	1.19581	0.179654	0.197025
394337181	high mobility group protein 1 [Azumapecten farreri]	1.19531	0.588745	0.397775
524911700	PREDICTED: charged multivesicular body protein 4c-like [Aplysia californica]	1.19437	0.588745	0.397775
762167339	PREDICTED: STE20-like serine/threonine-protein kinase [Crassostrea gigas]	1.19368	0.179654	0.197025
405951422	Eukaryotic translation initiation factor 3 subunit G-A [Crassostrea gigas]	1.19358	0.699134	0.445142
762114382	PREDICTED: importin-7-like isoform X1 [Crassostrea gigas]	1.19138	0.309524	0.270516
762117827	PREDICTED: uncharacterized protein LOC105338382 [Crassostrea gigas]	1.19135	0.0930736	0.144654
871264340	PREDICTED: collagen alpha-3(VI) chain-like isoform X2 [Aplysia californica]	1.19053	0.393939	0.311324
548421505	PREDICTED: elongation factor 1-delta-like isoform X2 [Pundamilia nyererei]	1.1901	0.393939	0.311324
405959793	ATP-dependent RNA helicase A-like protein [Crassostrea gigas]	1.18969	0.0649351	0.119258
871224133	PREDICTED: titin-like [Aplysia californica]	1.18961	0.179654	0.197025
325296731	ELAV 2-like protein [Aplysia californica]	1.18938	0.179654	0.197025
Q55BM1	Y0444_DICDI Probable inactive protein kinase DDB_G0270444 OS=Dictyostelium discoideum GN=DDB_G0270444 PE=1 SV=1	1.1893	0.309524	0.270516
212168987	S1 type peptidase [Octopus kaurna]	1.18854	0.24026	0.233451
524893470	PREDICTED: MICOS complex subunit Mic19-like isoform X3 [Aplysia californica]	1.18792	0.132035	0.168628
871239933	PREDICTED: UPF0568 protein C14orf166-like [Aplysia californica]	1.18787	0.132035	0.168628
762150883	PREDICTED: reticulon-1-A-like isoform X9 [Crassostrea gigas]	1.18705	0.00865801	0.0668034
524872452	PREDICTED: 39S ribosomal protein L12, mitochondrial-like [Aplysia californica]	1.18703	0.309524	0.270516
405961221	DNA replication licensing factor mcm2 [Crassostrea gigas]	1.18644	0.0649351	0.119258
762078274	PREDICTED: radixin-like isoform X3 [Crassostrea gigas]	1.18601	0.0411255	0.100424
147898624	uncharacterized protein LOC414579 [Xenopus laevis]	1.1854	0.179654	0.197025
871243636	PREDICTED: mucin-5AC-like [Aplysia californica]	1.18529	0.588745	0.397775
524883683	PREDICTED: THO complex subunit 4-like [Aplysia californica]	1.18523	0.24026	0.233451
676473553	hypothetical protein LOTGIDRAFT_218864 [Lottia gigantea]	1.18464	0.588745	0.397775
676422018	hypothetical protein LOTGIDRAFT_205558 [Lottia gigantea]	1.18463	0.0649351	0.119258
524909459	PREDICTED: succinyl-CoA ligase [ADP-forming] subunit beta, mitochondrial-like isoform X2 [Aplysia californica]	1.18447	0.699134	0.445142
762137167	PREDICTED: uncharacterized protein LOC105345447 isoform X1 [Crassostrea gigas]	1.18399	0.132035	0.168628
405970417	Titin [Crassostrea gigas]	1.18399	0.132035	0.168628
524866778	PREDICTED: C-terminal-binding protein-like isoform X1 [Aplysia californica]	1.18282	0.00865801	0.0668034
871241766	PREDICTED: septin-2-like [Aplysia californica]	1.18247	0.179654	0.197025
871276205	PREDICTED: ubiquitin-like-conjugating enzyme ATG3 [Aplysia californica]	1.18246	0.309524	0.270516
821325111	uncoupling protein 3 [Danio rerio]	1.18211	0.588745	0.397775
871228296	PREDICTED: protein enabled homolog [Aplysia californica]	1.18203	0.132035	0.168628
676465850	hypothetical protein LOTGIDRAFT_217219 [Lottia gigantea]	1.18095	0.0930736	0.144654
735659659	glyceraldehyde-3-phosphate dehydrogenase [Littorina littorea]	1.18045	0.484848	0.351238
676439482	hypothetical protein LOTGIDRAFT_200762 [Lottia gigantea]	1.18042	0.132035	0.168628
762161984	PREDICTED: uncharacterized protein LOC105322292 [Crassostrea gigas]	1.18026	0.393939	0.311324
676426406	hypothetical protein LOTGIDRAFT_198478 [Lottia gigantea]	1.17989	0.0411255	0.100424
762136427	PREDICTED: protein sel-1 homolog 1-like isoform X2 [Crassostrea gigas]	1.17889	0.309524	0.270516
[truncated: 1,772 more rows]
