# Supplementary material for: Proteogenomic Study of the Effect of an Improved Mixed Diet of Live Preys on the Aquaculture of Octopus vulgaris Paralarvae
Source: Frontiers journal article supplement (doi:10.3389/fmars.2021.817701), 2022-02-17
Supplement: Table_4.DOCX [file Table_4.DOCX]

Supplementary Material

**Supplementary Table 4.** Differential abundance for the statistically significant proteins found in the SWATH-MS proteomics analysis between *O. vulgaris* 20 days post-hatching paralarvae (PL20) fed on mixed diet (M) and *Artemi*a-based diet (A).

| UniProt accession | UniProt protein name/species | NCBI accession | NCBI protein name/species | Fold-change  (M *vs* A) | p-values Mann-Whitney | Change | Biological process/  GO_ID | Molecular function/ GO_ID |
| --- | --- | --- | --- | --- | --- | --- | --- | --- |
| E9GLZ0 | Chymotrypsin-like protein/*Daphnia pulex* | gi|321468619  gb|EFX79603.1 | Chymotrypsin-like protein/*Daphnia pulex* | 6.89 | 2.2E-03 | ↑ | Proteolysis/ GO:0006508 | Serine-type endopeptidase activity / GO: 0004252Peptidase activity/GO:0008233Serine-type peptidase activity/GO:0008236Hydrolase activity/GO:0016787 |
| V3ZTE3 | Uncharacterized protein/*Lottia gigantea* | gi|676490520  XP_009065297.1 | Hypothetical protein LOTGIDRAFT_203267/*Lottia gigantea* | 3.67 | 8.7E-03 | ↑ | Vacuolar transport/ GO:0007034 | _ |
| *A0A6P7SI33 | LIM and SH3 domain protein F42H10.3 isoform X18/ *Octopus vulgaris* | gi|871250970  XP_012941291.1 | LIM and SH3 domain protein 1/ *Aplysia californica* | 2.77 | 8.7E-03 | ↑ |  | Metal ion binding/ GO:0046872 |
| *A0A6P7SUE8 | Misshapen-like kinase 1 isoform X4/ *Octopus vulgaris* | gi|755981826  XP_011309716.1 | PREDICTED: serine/threonine-protein kinase mig-15 isoform X10/*Fopius arisanus* | 2.55 | 4.3E-03 | ↑ | Protein  phosphorylation/GO:0006468  Phosphorylation / GO:0016310 | ATP binding /  GO:0005524  Protein kinase activity  GO:004672  Kinase activity  GO:0016301  Nucleotide binding/  GO:0000166 |
| *A0A7E6FHL6 | Titin-like isoform X6/ *Octopus vulgaris* | gi|762129940  XP_011448097.1 | PREDICTED: titin-like isoform X6/*Crassostrea gigas* | 2.22 | 2.2E-03 | ↑ | _ | _ |
| V4BCR7 | UBA domain-containing protein/ *Lottia gigantea* | gi|676423133 XP_009044061.1 | Hypothetical proteinLOTGIDRAFT_228067/  *Lottia gigantea* | 2.14 | 8.7E-03 | ↑ | _ | _ |
| A0A6P3URJ4 | SAFB-like transcription modulator isoform X1/ *Bombus impatiens* | gi|815907918  XP_012239672.1 | PREDICTED: SAFB-like transcription modulator isoform X1/*Bombus impatiens* | 2.12 | 4.3E-03 | **↑** | **_** | RNA binding / GO:0003723  Nucleic acid binding / GO:0003676 |
| A0A093GAN7 | Phosvitin/ *Picoides pubescens* | gi|678200283  gb|KFV67265.1 | Vitellogenin-2, partial/*Picoides pubescens* | 2.11 | 4.3E-03 | ↑ | Lipid transport / GO:0006869 | Nutrient reservoir activity/GO:0045735 Lipid transporter activity / GO:0005319 |
| K1RD19 | RNA-binding protein 4/*Crassostrea gigas* | gi|405974565  EKC39200.1 | RNA-binding protein 4/*Crassostrea gigas* | 2.07 | 8.7E-03 | ↑ | _ | Nucleic acid binding / GO:0003676  Zinc ion binding/  GO:0008270  RNA binding / GO:0003723 |
| V4B4B3 | Uncharacterized protein/*Lottia gigantea* | gi|676492747  XP_009066021.1 | Hypothetical protein LOTGIDRAFT_133731/*Lottia gigantea* | 2.06 | 4.3E-03 | ↑ | RNA processing / GO:0006396 | RNA binding / GO:0003723  Adenosine deaminase activity / GO:0004000 |
| _ |  | gi|762106002  XP_011435580.1 | PREDICTED: uncharacterized protein LOC105334014 isoform X3 / *Crassostrea gigas* | 2.02 | 2.16E-03 | ↑ | _ | _ |
| Q9IBG7 | Kielin/chordin-like protein/ *Xenopus laevis* | sp|Q9IBG7 | Kielin/chordin-like protein/ *Xenopus laevis* | 2.00 | 4.3E-03 | ↑ | _ | _ |
| V3ZM47 | Uncharacterized protein/ *Lottia gigantea* | gi|676464632  XP_009056983.1 | Hypothetical protein LOTGIDRAFT_162734 / *Lottia gigantea* | 0.50 | 4.3E-03 | ↓ | Negative regulation of nucleic acid-templated transcription /GO:0045892 | Transcription corepressor activity / GO:0003714 |
| I6XSF1 | Caspase 3 / *Cynops orientalis* | gi|395395171  gb|AFN55260.1 | Caspase 3 / *Cynops orientalis* | 0.50 | 4.3E-03 | ↓ | Proteolysis / GO:000650  Apoptotic process / GO:0006915 | Cysteine-type peptidase activity /GO:0008234  Cysteine-type endopeptidase activity/  GO:0004197  Peptidase activity /GO:0008233  Hydrolase activity / GO:0016787 |
| A0A6P7T833 | 3-oxoacyl-[acyl-carrier-protein] reductase FabG/ *Octopus vulgaris* | gi|1697406406  XP_029646407.1 | 3-oxoacyl-[acyl-carrier-protein] reductase FabG/*Octopus sinensis* | 0.49 | 2.2E-03 | ↓ | _ | Oxidoreductase activity /GO:0016491 |
| A0A6P7TI21 | Delta-1-pyrroline-5-carboxylate synthase /*Octopus vulgaris* | gi|1697419816  XP_029649427.1 | Delta-1-pyrroline-5-carboxylate synthase /*Octopus sinensis* | 0.49 | 4.3E-03 | ↓ | Proline biosynthetic process / GO:0006561 L-proline biosynthetic process/ GO:0055129 Phosphorylation/ GO:0016310 Cellular amino acid biosynthetic process/ GO:0008652Metabolic process /GO:0008152 | Glutamate 5-kinase activity/ GO:0004349 Glutamate-5-semialdehyde dehydrogenase activity /GO:0004350Oxidoreductase activity /GO:0016491 Oxidoreductase activity, acting on the aldehyde or oxo group of donors, NAD or NADP as acceptor/ GO:0016620 Catalytic activity/ GO:0003824ATP binding/ GO:0005524 Kinase activity/ GO:0016301  Transferase activity/  GO:0016740  Nucleotide binding/GO:0000166 |
| M1VBI1 | Carbonic anhydrase / *Crassostrea gigas* | gi|456359321  dbj|BAM93475 | Carbonic anhydrase / *Crassostrea gigas* | 0.49 | 4.3E-03 | ↓ | _ | Carbonate dehydratase activity / GO:0004089  Zinc ion binding / GO:0008270 Lyase activity/ GO:0016829 Metal ion binding / GO:0046872 |
| V4ARC8 | Glyco_18 domain-containing protein/ *Lottia gigantea* | gi|676452477  XP_009053044.1 | Hypothetical protein LOTGIDRAFT_94382, partial*/ Lottia gigantea* | 0.49 | 4.3E-03 | ↓ | Carbohydrate metabolic process / GO:0005975 Metabolic process/ GO:0008152 | Chitin binding / GO:0008061 Hydrolase activity / GO:0016787Hydrolase activity, acting on glycosyl bonds/ GO:0016798 Hydrolase activity, hydrolyzing O-glycosyl compounds /  GO:0004553 |
| **K1QYG7 | Glutamine--fructose-6-phosphate transaminase (isomerizing)/ *Crassostrea gigas* | gi|762127166  XP_011446658.1 | Glutamine--fructose-6-phosphate aminotransferase [isomerizing] 1 isoform X5/ *Crassostrea gigas* | 0.48 | 2.2E-03 | ↓ | Carbohydrate derivative metabolic process / GO:1901135  Glutamine metabolic process / GO:0006541 | Carbohydrate derivative binding, / GO:0097367  Transferase activity /  GO:0016740  Glutamine-fructose-6-phosphate transaminase (isomerizing) activity / GO:0004360  Transaminase activity, GO:0008483 |
| V4ABP3 | NTP_transferase domain-containing protein/ *Lottia gigantea* | gi|676469579  XP_009058578.1 | Hypothetical protein LOTGIDRAFT_227532 / *Lottia gigantea* | 0.47 | 2.2E-03 | ↓ | Biosynthetic process / GO:0009058 | Transferase activity / GO:0016740  Nucleotidyltransferase activity / GO:0016779 |
| K1PJC1 | Adipophilin / *Crassostrea gigas* | gi|405954235 gb|EKC21733.1 | Adipophilin / *Crassostrea gigas* | 0.47 | 4.3E-03 | ↓ | Negative regulation of transcription, DNA-templated/ GO:0045892 | Transcription corepressor activity / GO:0003714 |
| K1QT65 | Collagen alpha-3(VI) chain/ *Crassostrea gigas* | gi|405966888  gb|EKC32120.1 | Collagen alpha-3(VI) chain */ Crassostrea gigas* | 0.47 | 2.2E-03 | ↓ | _ |  |
| D2KX87 | Serine protease 1/ *Heterololigo bleekeri* | gi|283837550  dbj|BAI66447.1 | Serine protease 1 / *Heterololigo bleekeri* | 0.46 | 4.3E-03 | ↓ | Proteolysis / GO:0006508 | Serine-type endopeptidase activity /  GO:0004252  Hydrolase activity/ GO:0016787  Peptidase activity/  GO:0008233 Serine-type peptidase activity/GO:0008236 |
| **A0A6P7TL40 | Calcium load-activated calcium channel/ *Octopus vulgaris* | gi|871252834  XP_012941615.1 | Calcium load-activated calcium channel/ *Aplysia californica* | 0.45 | 2.2E-03 | ↓ | Calcium ion transport/ GO:0006816 Ion transport/  GO:0006811  Calcium ion transmembrane transport / GO:0070588  Endoplasmic reticulum calcium ion homeostasis / GO:0032469 | Calcium channel activity / GO:0005262 |
| A0A0H5ANU0 | Beta arrestin */ Idiosepius paradoxus* | gi|827883539  dbj|BAR90777.1 | Beta arrestin */ Idiosepius paradoxus* | 0.44 | 8.7E-03 | ↓ | Signal transduction / GO:0007165 | _ |
| V4B2N8 | Derlin/ *Lottia gigantean* | gi|676494434  XP_009066562.1 | Hypothetical protein LOTGIDRAFT_205920 / *Lottia gigantean* | 0.44 | 4.3E-03 | ↓ | _ | _ |
| *A0A6P7SKG2 | Glutamine--fructose-6-phosphate transaminase (isomerizing)/ *Octopus vulgaris* | gi|762127168  XP_011446659.1 | Glutamine--fructose-6-phosphate aminotransferase [isomerizing] 1 isoform X6 / *Crassostrea gigas* | 0.42 | 8.7E-03 | ↓ | UDP-N-acetylglucosamine biosynthetic process / GO:0006048  Carbohydrate derivative biosynthetic process / GO:1901137  Carbohydrate derivative metabolic process / GO:1901135  Glutamine metabolic process / GO:0006541 | Carbohydrate derivative binding / GO:0097367  Transaminase activity / GO:0008483  Transferase activity /  GO:0016740  Glutamine-fructose-6-phosphate transaminase (isomerizing) activity / GO:0004360 |
| A0A6P7SU44 | Cartilage matrix protein-like/ *Octopus vulgaris* | gi|1697453666  XP_029641815.1 | Cartilage matrix protein-like/*Octopus sinensis* | 0.42 | 4.3E-03 | ↓ | _ | _ |
| **A0A7E6FKQ8 | Collagen alpha-4(VI) chain-like/ *Octopus vulgaris* | gi|762116501  XP_011441088.1 | PREDICTED: collagen alpha-4(VI) chain-like / *Crassostrea gigas* | 0.40 | 4.3E-03 | ↓ | _ | _ |
| A0A6P7TZN0 | UPF0462 protein C4orf33 homolog isoform X3 /*Octopus vulgaris* | gi|1697376434  XP_029657914.1 | UPF0462 protein C4orf33 homolog isoform X3 /*Octopus sinensis* | 0.38 | 2.2E-03 | ↓ | _ | _ |
| W5M2B7 | Tyrosine--tRNA ligas/ *Lepisosteus oculatus* | gi|573887259  XP_006631409.1 | PREDICTED: tyrosine--tRNA ligase, cytoplasmic-like / *Lepisosteus oculatus* | 0.36 | 2.2E-03 | ↓ | Tyrosyl-tRNA aminoacylation / GO:0006437  RNA aminoacylation for protein translation / GO:0006418  Translation / GO:0006412 | Tyrosine-tRNA ligase activity /  GO:0004831 ATP binding/ GO: GO:0005524 Aminoacyl-tRNA ligase activity /  GO:0004812  Ligase / GO:0016874  tRNA binding /  GO:0000049  Nucleotide binding / GO:0000166  RNA binding / GO:0003723 |
| A0A6P7TFX6 | Golgi-associated plant pathogenesis-related protein 1-like/*Octopus vulgaris* | gi|1697419007  XP_029649150.1 | Golgi-associated plant pathogenesis-related protein 1 /*Octopus sinensis* | 0.33 | 4.3E-03 | ↓ | _ | _ |
| Q7QIX6 | Nucleoside diphosphate kinase/*Anopheles gambiae* | gi|158286242  XP_308641.4 | AGAP007120-PA / *Anopheles gambiae* str. PEST | 0.31 | 8.7E-03 | ↓ | CTP biosynthetic process / GO:0006241  UTP biosynthetic process /  GO:0006228  GTP biosynthetic process / GO:0006183  Nucleoside diphosphate phosphorylation / GO:0006165  Phosphorylation / GO:0016310 | Nucleoside diphosphate kinase activity/  GO:0004550  Kinase activity /  GO:0016301  ATP binding/  GO:0005524  Transferase activity/  GO:0016740  Nucleotide binding /  GO:0000166 |
| V3ZYP8 | Uncharacterized protein/*Lottia gigantea* | gi|676479144  XP_009061653.1 | Hypothetical protein LOTGIDRAFT_127363*/Lottia gigantea* | 0.28 | 2.2E-03 | ↓ | Carboxylic acid metabolic process / GO:0019752 | Pyridoxal phosphate binding / GO:0030170  Carbon-carbon lyase activity/ GO:0016830  Carboxy-lyase activity / GO:0016831 Catalytic activity/GO:0003824 Lyase activity /  GO:0016829 |
| V3ZV16 | Uncharacterized protein*/Lottia gigantea* | gi|676488352  XP_009064588.1 | Hypothetical protein LOTGIDRAFT_168464 /*Lottia gigantea* | 0.26 | 2.2E-03 | ↓ | Inorganic anion transport / GO:0015698  Transmembrane transport / GO:0055085  Anion transmembrane transport / GO:0098656 | Voltage-gated anion channel activity / GO:0008308 Porin activity/GO:0015288 |
| **A0A6P7SNY5 | Sulfotransferase 6B1/*Octopus vulgaris* | gi|871245287  XP_005102442.2 | Sulfotransferase 6B1-like, partial/*Aplysia californica* | 0.26 | 2.2E-03 | ↓ | _ | Sulfotransferase activity / GO:0008146  Transferase activity/GO:0016740 |
| U5YCS3 | Actin/*Rapana venosa* | gi|557132944  gb|AGZ87937.1 | Actin/*Rapana venosa* | 0.20 | 2.2E-03 | ↓ | _ | _ |
| E9FS40 | Uncharacterized protein/*Daphnia pulex* | gi|321479428  gb|EFX90384.1 | Hypothetical protein DAPPUDRAFT_309644 /*Daphnia pulex* | 0.18 | 8.7E-03 | ↓ | Extracellular matrix organization / GO:0030198  Cell adhesion / GO:0007155 | Cell adhesion molecule binding / GO:0050839 |
| D6WHD6 | Protein disulfide-isomerase/ *Tribolium castaneum* | gi|642916360  XP_008190988.1 | PREDICTED: protein disulfide-isomerase / *Tribolium castaneum* | 0.18 | 8.7E-03 | ↓ | Response to endoplasmic reticulum stress / GO:0034976  Protein folding / GO:0006457 | Isomerase activity / GO:0016853  Protein disulfide isomerase activity / GO:0003756 |
| Q06268 | Omega-crystallin / *Enteroctopus dofleini* | gi|159741  gb|AAA16613.1 | Omega-crystallin / *Enteroctopus dofleini* | 0.16 | 2.2E-03 | ↓ | _ | _ |
| A7RPG9 | Homogentisate 1,2-dioxygenase/ *Nematostella vectensis* | gi|156400021  XP_001638799.1 | Predicted protein /  *Nematostella vectensis* | 0.16 | 2.2E-03 | ↓ | L-phenylalanine catabolic process / GO:0006559  Tyrosine metabolic process / GO:0006570 | Homogentisate 1,2-dioxygenase activity /  GO:0004411 Metal ion binding /GO:0046872 |
| E9GAM4 | 2-phospho-D-glycerate hydro-lyase/*Daphnia pulex* | gi|321472306  EFX83276.1 | Enolase/*Daphnia pulex* | 0.14 | 4.3E-03 | ↓ | Glycolytic process / GO:0006096 Regulation of vacuole fusion, non-autophagic/GO:0032889 | Phosphopyruvate hydratase activity /  GO:0004634  Lyase activity/  GO:0016829  Magnesium ion binding/  GO:0000287 |
| E9HR84 | Calcium-transporting ATPase/ *Daphnia pulex* | gi|321454575gb|EFX65740.1 | Hypothetical protein  DAPPUDRAFT_65262 /  *Daphnia pulex* | 0.13 | 4.3E-03 | ↓ | Calcium ion transport / GO:0006816 Ion transport/GO:0006811Proton transmembrane transport/ GO:1902600 Cellular calcium ion homeostasis / GO:0006874  Calcium ion transmembrane transport / GO:0070588 | P-type calcium transporter activity/GO:0005388 ATP binding /  GO:0005524  Nucleotide binding/  GO:0000166  ATPase activity/ GO: 0016887 P-type proton-exporting transporter activity/ GO:0008553 |

Footnote: GO ID: GO annotations on QuickGO for Biological process and Molecular function. **(*)** UniProt accession selected by best alignment hit; (**) UniProt accession selected by protein name/species.
