# Supplementary material for: Proteogenomic Study of the Effect of an Improved Mixed Diet of Live Preys on the Aquaculture of Octopus vulgaris Paralarvae
Source: Frontiers journal article supplement (doi:10.3389/fmars.2021.817701), 2022-02-17
Supplement: Table_5.XLSX [file Table_5.XLSX]

## Sheet: Supplementary Table 5A
	Supplementary Table 5A: Summary of Biological process: Quick GO terms of proteins with significant differences in expression caused by diet in 20 days post-hatching paralarvae of O. vulgaris (M vs A comparision). In Bold proteins Up-regulated
	Specific GO term	GO_ID	Up/down proteins	Specific GO term	GO_ID	Protein name	NCBI Protein accession
	Biological regulation	GO:00065007	0/7	Negative regulation of nucleic acid-templated transcription	GO:0045892	Hypothetical protein LOTGIDRAFT_162734	gi|676464632
				Negative regulation of transcription, DNA-templated	GO:0045892	Adipophilin	gi|405954235
				Signal transduction	GO:0007165	Beta arrestin	gi|827883539
				Negative regulation of endopeptidase activity	GO:0010951	PREDICTED: collagen alpha-4(VI) chain-like	gi|762116501
				Cell redox homeostasis	GO:0045454	PREDICTED: protein disulfide-isomerase	gi|642916360
				Regulation of vacuole fusion, non-autophagic	GO:0032889	Enolase	gi|321472306
				Cellular calcium ion homeostasis	GO:0006874	Hypothetical proteinDAPPUDRAFT_65262	gi|321454575
	Biological adhesion	GO:0022610	0/1	Endoplasmic reticulum calcium ion homeostasis	GO:0032469	Calcium load-activated calcium channel	gi|871252834
				Cell adhesion	GO:0007155	Hypothetical protein DAPPUDRAFT_309644	gi|321479428
	Metabolic process	GO:0008152	3/16	Proteolysis	GO:0006508	Chymotrypsin-like protein	gi|321468619
				Phosphorylation	GO:0016310	PREDICTED: serine/threonine-protein kinase mig-15 isoform X10	gi|755981826
				Protein phosphorylation	GO:0006468
				RNA processing	GO:0006396	Hypothetical protein LOTGIDRAFT_133731	gi|676492747
				Activation of protein kinase activity	GO:0032147
				Negative regulation of nucleic acid-templated transcription	GO:1903507	Hypothetical protein LOTGIDRAFT_162734	gi|676464632
				Proteolysis	GO:0006508	Caspase 3	gi|395395171
				L-proline biosynthetic process	GO:0055129	Delta-1-pyrroline-5-carboxylate synthase	gi|1697419816
				Proline biosynthetic process	GO:0006561
				Phosphorylation	GO:0016310
				Cellular amino acid biosynthetic process	GO:0008652
				Carbohydrate metabolic process	GO:0005975	Hypothetical protein LOTGIDRAFT_94382, partial	gi|676452477
				Carbohydrate derivative metabolic process	GO:1901135	Glutamine--fructose-6-phosphate aminotransferase [isomerizing] 1 isoform X5	gi|762127166
				Glutamine metabolic process	GO:0006541
				Biosynthetic process	GO:0009058	Hypothetical protein LOTGIDRAFT_227532	gi|676469579
				Proteolysis	GO:0006508	Serine protease 1	gi|283837550
				Carbohydrate derivative metabolic process	GO:1901135	Glutamine--fructose-6-phosphate aminotransferase [isomerizing] 1 isoform X6	gi|762127168
				Carbohydrate derivative biosynthetic process	GO:1901137
				Glutamine metabolic process	GO:0006541
				UDP-N-acetylglucosamine biosynthetic process	GO:0006048
				Negative regulation of endopeptidase activity	GO:0010951	PREDICTED: collagen alpha-4(VI) chain-like	gi|762116501
				RNA aminoacylation for protein translation	GO:0006418
				Tyrosyl-tRNA aminoacylation	GO:0006437	PREDICTED: tyrosine--tRNA ligase, cytoplasmic-like	gi|573887259
				Translation	GO:0006412
				CTP biosynthetic process	GO:0006241	AGAP007120-PA	gi|158286242
				UTP biosynthetic process	GO:0006228
				GTP biosynthetic process	GO:0006183
				Nucleoside diphosphate phosphorylation	GO:0006165
				Phosphorylation	GO:0016310
				Carboxylic acid metabolic process	GO:0019752	Hypothetical protein LOTGIDRAFT_127363	gi|676479144
				Cell adhesion	GO:0007155	Hypothetical protein DAPPUDRAFT_309644	gi|321479428
				L-phenylalanine catabolic process	GO:0006559	Predicted protein	gi|156400021
				Tyrosine metabolic process	GO:0006570
				Glycolytic process	GO:0006096	Enolase	gi|321472306
				Cellular calcium ion homeostasis	GO:0006874	Hypothetical proteinDAPPUDRAFT_65262	gi|321454575
	Cellular process	GO:0009987	3/16	Vacuolar transport	GO:0007034	Hypothetical protein LOTGIDRAFT_203267	gi|676490520
				Protein phosphorylation	GO:0006468	PREDICTED: serine/threonine-protein kinase mig-15 isoform X10	gi|755981826
				Phosphorylation	GO:0016310
				RNA processing	GO:0006396	Hypothetical protein LOTGIDRAFT_133731	gi|676492747
				Negative regulation of nucleic acid-templated transcription	GO:1903507	Negative regulation of nucleic acid-templated transcription	gi|676464632
				Apoptotic process	GO:0006915	Caspase 3	gi|395395171
				L-proline biosynthetic process	GO:0055129	Delta-1-pyrroline-5-carboxylate synthase	gi|1697419816
				Proline biosynthetic process	GO:0006561
				Phosphorylation	GO:0016310
				Cellular amino acid biosynthetic process	GO:0008652
				Negative regulation of nucleic acid-templated transcription	GO:1903507	Adipophilin	gi|405954235
				Endoplasmic reticulum calcium ion homeostasis	GO:0032469	Calcium load-activated calcium channel	gi|871252834
				Calcium ion transmembrane transport	GO:0070588
				Glutamine metabolic process	GO:0006541	Glutamine--fructose-6-phosphate aminotransferase [isomerizing] 1 isoform X6	gi|762127168
				Signal transduction	GO:0007165	Beta arrestin	gi|827883539
				Negative regulation of endopeptidase activity	GO:0010951	PREDICTED: collagen alpha-4(VI) chain-like	gi|762116501
				RNA aminoacylation for protein translation	GO:0006418	PREDICTED: tyrosine--tRNA ligase, cytoplasmic-like	gi|573887259
				tyrosyl-tRNA aminoacylation,	GO:0006437
				Translation	GO:0006412
				CTP biosynthetic process	GO:0006241	AGAP007120-PA	gi|158286242
				UTP biosynthetic process	GO:0006228
				GTP biosynthetic process	GO:0006183
				Nucleoside diphosphate phosphorylation	GO:0006165
				Phosphorylation	GO:0016310
				Carboxylic acid metabolic process	GO:0019752	Hypothetical protein LOTGIDRAFT_127363	gi|676479144
				Transmembrane transport	GO:0055085	Hypothetical protein LOTGIDRAFT_168464	gi|676488352
				Anion transmembrane transport	GO:0098656
				Extracellular matrix organization	GO:0030198	Hypothetical protein DAPPUDRAFT_309644	gi|321479428
				Cell adhesion	GO:0007155
				Response to endoplasmic reticulum stress	GO:0034976	PREDICTED: protein disulfide-isomerase	gi|642916360
				Protein folding	GO:0006457
				L-phenylalanine catabolic process	GO:0006559	Predicted protein	gi|156400021
				Tyrosine metabolic process	GO:0006570
				Glycolytic process	GO:0006096	Enolase	gi|321472306
				Regulation of vacuole fusion, non-autophagic	GO:0032889
				Calcium ion transmembrane transport	GO:0070588	Hypothetical proteinDAPPUDRAFT_65262	gi|321454575
				Cellular calcium ion homeostasis	GO:0006874
	Response to stimulus	GO:0050896	0/2	Signal transduction	GO:0007165	Beta arrestin	gi|827883539
				Response to endoplasmic reticulum stress /	GO:0034976	PREDICTED: protein disulfide-isomerase	gi|642916360
	Transport	GO:0006810	2/3	Vacuolar transport	GO:0007034	Hypothetical protein LOTGIDRAFT_203267	gi|676490520
				Lipid transport	GO:0006869	Vitellogenin-2, partial	gi|678200283
				Calcium ion transmembrane transport	GO:0070588	Hypothetical proteinDAPPUDRAFT_65262	gi|321454575
				Calcium ion transport	GO:0006816
				Ion transport	GO:0006811
				Proton transmembrane transport	GO:1902600
				Calcium ion transport	GO:0006816	Calcium load-activated calcium channel	gi|871252834
				Ion transport	GO:0006811
				Calcium ion transmembrane transport	GO:0070588
				Inorganic anion transport	GO:0015698	Hypothetical protein LOTGIDRAFT_168464	gi|676488352
				Transmembrane transport	GO:0055085
				Anion transmembrane transport	GO:0098656
	Localization	GO:0051179	0/3	Inorganic anion transport	GO:0015698	Hypothetical protein LOTGIDRAFT_168464	gi|676488352
				Transmembrane transport	GO:0055085
				Anion transmembrane transport	GO:0098656
				Calcium ion transmembrane transport	GO:0070588	Calcium load-activated calcium channel	gi|871252834
				Calcium ion transmembrane transport	GO:0070588	Hypothetical proteinDAPPUDRAFT_65262	gi|321454575
				Calcium ion transport	GO:0006816
				Ion transport	GO:0006811
				Proton transmembrane transport	GO:1902600

## Sheet: Supplementary Table 5B 
	Supplementary Table 5B: Summary of Molecular function: Quick GO terms of protein with significant differences in expression caused by diet (M vs A comparision). In Bold proteins Up-regulated
	Specific GO term	GO_ID	Up/down proteins	Specific GO term	GO_ID	Protein name	NCBI Protein accession
	Catalitic activity	GO:0003824	3/17	Serine-type endopeptidase activity	GO: 0004252	Chymotrypsin-like protein	gi|321468619
				Peptidase activity	GO:0008233
				Serine-type peptidase activity/	GO:0008236
				Hydrolase activity	GO:0016787
				Kinase activity	GO:0016301	PREDICTED: serine/threonine-protein kinase mig-15 isoform X10	gi|755981826
				Protein kinase activity	GO:004672
				Adenosine deaminase activity	GO:0004000	Hypothetical protein LOTGIDRAFT_133731	gi|676492747
				Cysteine-type peptidase activity	GO:0008234	Caspase 3	gi|395395171
				Cysteine-type endopeptidase activity	GO:0004197
				Hydrolase activity	GO:0016787
				Peptidase activity	GO:0008233
				Oxidoreductase activity	GO:0016491	3-oxoacyl-[acyl-carrier-protein] reductase FabG/Octopus sinensis	gi|1697406406
				Glutamate 5-kinase activity	GO:0004349	Delta-1-pyrroline-5-carboxylate synthase	gi|1697419816
				Glutamate-5-semialdehyde dehydrogenase activity,	GO:0004350
				Oxidoreductase activity	GO:0016491
				Oxidoreductase activity, acting on the aldehyde or oxo group of donors, NAD or NADP as acceptor/	GO:0016620
				kinase activity	GO:0016301
				Transferase	GO:0016740
				Carbonate dehydratase activity	GO:0004089	Carbonic anhydrase	gi|456359321
				Lyase activity	GO:0016829
				Hydrolase activity	GO:0016787	Hypothetical protein LOTGIDRAFT_94382, partial	gi|676452477
				hydrolase activity, acting on glycosyl bonds	GO:0016798
				Hydrolyzing O-glycosyl compounds	GO:0004553
				Glutamine-fructose-6-phosphate transaminase (isomerizing) activity,	GO:0004360	Glutamine--fructose-6-phosphate aminotransferase [isomerizing] 1 isoform X5	gi|762127166
				Transferase activity	GO:0016740
				Transaminase activity	GO:0008483
				Transferase activity	GO:0016740	Hypothetical protein LOTGIDRAFT_227532	gi|676469579
				Nucleotidyl transferase activity	GO:0016779
				serine-type endopeptidase activity	GO:0004252	Serine protease 1	gi|283837550
				serine-type peptidase activity	GO:0008236
				peptidase activity	GO:0008233
				hydrolase activity	GO:0016787
				Glutamine-fructose-6-phosphate transaminase (isomerizing) activity,	GO:0004360	Glutamine--fructose-6-phosphate aminotransferase [isomerizing] 1 isoform X6	gi|762127168
				Transferase activity	GO:0016740
				Transaminase activity	GO:0008483
				Tyrosine-tRNA ligase activity	GO:0004831	PREDICTED: tyrosine--tRNA ligase, cytoplasmic-like	gi|573887259
				Aminoacyl-tRNA ligase activity	GO:0004812
				Ligase	GO:0016874
				Nucleoside diphosphate kinase activity	GO:0004550	AGAP007120-PA	gi|158286242
				Transferase activity	GO:0016740
				kinase activity	GO:0016301
				Carboxy-lyase activity	GO:0016831	Hypothetical protein LOTGIDRAFT_127363	gi|676479144
				Lyase activity	GO:0016829
				Sulfotransferase activity	GO:0008146	Sulfotransferase 6B1-like, partial	gi|871245287
				Transferase activity	GO:0016740
				Isomerase activity	GO:0016853	PREDICTED: protein disulfide-isomerase	gi|642916360
				Protein disulfide isomerase activity	GO:0003756
				Homogentisate 1,2-dioxygenase activity	GO:0004411	Predicted protein	gi|156400021
				Phosphopyruvate hydratase activity	GO:0004634	Enolase	gi|321472306
				Lyase activity	GO:0016829
				ATPase activity	GO:0016887	Hypothetical proteinDAPPUDRAFT_65262	gi|321454575
	Binding	GO:000548	5/13	Metal ion binding	GO:0046872	LIM and SH3 domain protein	gi|871250970
				ATP binding	GO:0005524	PREDICTED: serine/threonine-protein kinase mig-15 isoform X10	gi|755981826
				Nucleotide binding	GO:0000166
				Nucleic acid binding	GO:0003676	PREDICTED: SAFB-like transcription modulator isoform X1	gi|815907918
				RNA binding	GO:0003723
				Nucleic acid binding	GO:0003676	RNA-binding protein 4	gi|405974565
				Zinc ion binding	GO:0008270
				RNA binding	GO:0003723
				RNA binding	GO:0003723	Hypothetical protein LOTGIDRAFT_133731	gi|676492747
				ATP binding	GO:0005524	Delta-1-pyrroline-5-carboxylate synthase	gi|1697419816
				Nucleotide binding	GO:0000166
				Metal ion binding	GO:0046872	Carbonic anhydrase	gi|456359321
				Zinc ion binding	GO:0008270
				Chitin binding	GO:0008061	Hypothetical protein LOTGIDRAFT_94382, partial	gi|676452477
				Carbohydrate derivative binding	GO:0097367	Glutamine--fructose-6-phosphate aminotransferase [isomerizing] 1 isoform X5	gi|762127166
				Protein binding	GO:0005515	Collagen alpha-3(VI) chain	gi|405966888
				Carbohydrate derivative binding	GO:0097367	Gutamine-fructose-6-phosphate aminotransferase [isomerizing] 1 isoform X6	gi|762127168
				tRNA binding	GO:0000049	PREDICTED: tyrosine--tRNA ligase, cytoplasmic-like	gi|573887259
				Nucleotide binding	GO:0000166
				RNA binding	GO: 0003723
				Nucleotide binding	GO:0000166	AGAP007120-PA	gi|158286242
				ATP binding	GO:0005524
				Pyridoxal phosphate binding	GO:0030170	Hypothetical protein LOTGIDRAFT_127363	gi|676479144
				Cell adhesion molecule binding	GO:0050839	Hypothetical protein DAPPUDRAFT_309644	gb|EFX90384.1
				Metal ion binding	GO:0046872	Predicted protein	gi|156400021
				Magnesium ion binding	GO:0000287	Enolase	gi|321472306
				Nucleotide binding	GO:0000166	Hypothetical proteinDAPPUDRAFT_65262	gi|321454575
				ATP binding	GO:0005524
	Transporter activity	GO:0005215	1/3	Lipid transporter activity,	GO:0005319	Vitellogenin-2, partial	gi|678200283
				Calcium channel activity	GO:0005262	Calcium load-activated calcium channel	gi|871252834
				Voltage-gated anion channel activit	GO:0008308	Hypothetical protein LOTGIDRAFT_168464	gi|676488352
				Porin activity	GO:0015288
				P-type calcium transporter activity	GO:0005388	Hypothetical proteinDAPPUDRAFT_65262	gi|321454575
				P-type proton-exporting transporter activity/	GO:0008553
	Transcription regulator activity	GO:0140110	0/2	Transcription corepressor activity	GO:0003714	Hypothetical protein LOTGIDRAFT_162734	gi|676464632
				Transcription corepressor activity	GO:0003714	Adipophilin	gi|405954235
